# Supplementary material for: 5‐(Cyano)dibenzothiophenium Triflate: A Sulfur‐Based Reagent for Electrophilic Cyanation and Cyanocyclizations
Source: PubMed Central journal article supplement — Angew Chem Int Ed Engl. 2019 Jun 6;58(28):9496–500. doi: 10.1002/anie.201904557 (PMC6618300; doi:10.1002/anie.201904557), 2019-06-06

Supporting Information

**5-(Cyano)dibenzothiophenium Triflate: A Sulfur-Based Reagent for  
Electrophilic Cyanation and Cyanocyclizations**

*Xiangdong Li, Christopher Golz, and Manuel Alcarazo\**

anie\_201904557\_sm\_miscellaneous\_information.pdf

## Supporting Information

| <b>Table of Contents</b>                                              | <b>Page</b> |
|-----------------------------------------------------------------------|-------------|
| 1. General methods                                                    | 2           |
| 2. Synthesis of 5-(cyano)dibenzothiophenium triflate <b>9</b>         | 3           |
| 3. Preparation of substrates                                          | 3           |
| 4. Direct metal-free cyanation of nucleophiles using <b>9</b>         | 14          |
| 5. Metal-free cyano-cyclization of indole derivatives                 | 31          |
| 6. Metal-free cyano-Povarov cycloaddition of indole derivatives       | 41          |
| 7. Intermolecular cyano-[4+2] cycloaddition using unactivated olefins | 45          |
| 8. Control experiments                                                | 47          |
| 9. X-ray crystal structures                                           | 48          |
| 10. References                                                        | 62          |
| 11. NMR spectra                                                       | 64          |

## 1. General methods

All dry solvents were obtained from a solvent purification system MBSPS7 from M.Braun. All reactions were carried out under nitrogen atmosphere unless stated otherwise.  $^1\text{H}$  and  $^{13}\text{C}$  NMR spectra were recorded at room temperature in  $\text{CDCl}_3$ ,  $\text{CD}_3\text{CN}$  or  $\text{DMSO-}d_6$  on Bruker AV 500, 400 or DPX 300 NMR spectrometer.  $^1\text{H}$  NMR spectra was recorded with  $\text{CDCl}_3$  (tetramethylsilane,  $\delta = 0.00$  ppm),  $\text{CD}_3\text{CN}$  ( $\delta = 1.94$  ppm), Methylene Chloride- $d_2$  or  $\text{DMSO-}d_6$  ( $\delta = 2.50$  ppm) as internal reference;  $^{13}\text{C}$  NMR spectra was recorded with  $\text{CDCl}_3$  ( $\delta = 77.16$  ppm),  $\text{CD}_3\text{CN}$  ( $\delta = 1.32$  ppm) or  $\text{DMSO-}d_6$  ( $\delta = 39.52$  ppm) as internal reference. Mass spectra were measured on a Finnigan MAT 8200 (70 eV) (EI), a Finnigan MAT 95 (ESI), or a Bruker APEX III FT-MS (7 T magnet) mass spectrometer. IR spectra were recorded on a JASCO FT/IR-4100 spectrometer at room temperature, the stretching frequencies are reported in wavenumbers ( $\text{cm}^{-1}$ ). Column chromatography was performed either on Merck 60 (40-63  $\mu\text{m}$ ) silica gel or Biotage One automated column chromatography system on CHROMABOND<sup>®</sup> Flash BT 15g (or 25g) SiOH 40-63  $\mu\text{m}$  from Macherey-Nagel. Thin-layer chromatography (TLC) analysis was performed using POLYGRAM<sup>®</sup> SIL G/UV254 TLC plates from Macherey-Nagel and visualized by UV irradiation and/or phosphomolybdic acid staining. All commercially available compounds (Acros, ABCR, Alfa Aesar, Aldrich, Fluorochem, TCI) were used as received unless stated otherwise.

## 2. Synthesis of 5-(cyano)dibenzothiophenium triflate **9**

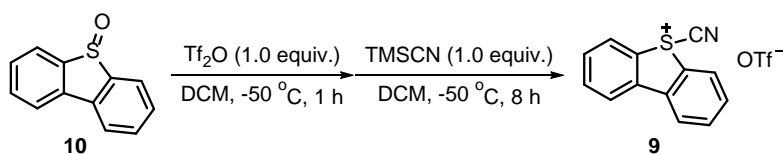

Tf<sub>2</sub>O (25 mmol, 1 equiv, 4.205 mL) was added dropwise within 5 minutes to a solution of dibenzo[*b,d*]thiophene 5-oxide **10**<sup>[1]</sup> (1.0 equiv., 25 mmol, 5.007 g) in dry dichloromethane (350 mL) at -50°C under N<sub>2</sub>. After stirring the resulting mixture for 1 hour, TMSCN (25 mmol, 1.0 equiv., 3.35 mL) was added dropwise and the mixture was further stirred at -50°C for 8 additional hours. Then, the cooling system was removed, and the formed suspension was allowed reaching room temperature. Filtration of the solvents afforded **9** as a white/beige solid, which was further washed with dichloromethane (2 x 50 mL), and finally dried under vacuum (5.39 g, 15.0 mmol, 60%). <sup>1</sup>H NMR (300 MHz, Acetonitrile-*d*<sub>3</sub>) δ = 8.56 (d, *J* = 8.4 Hz, 2H), 8.34 (dd, *J* = 7.8, 1.2 Hz, 2H), 8.04 (td, *J* = 7.8, 1.2 Hz, 2H), 7.89-7.83 (m, 2H). <sup>13</sup>C NMR (75 MHz, Acetonitrile-*d*<sub>3</sub>) δ 141.7, 137.2, 133.7, 130.0, 127.2, 126.4, 121.9 (q, *J* = 320.4 Hz), 103.9. IR (neat): 3097, 2192, 1578, 1484, 1448, 1423, 1278, 1250, 1221, 1174, 1161, 1152, 1024, 780, 754, 700, 648, 631, 575, 514 cm<sup>-1</sup>; HRMS calculated *m/z* for C<sub>13</sub>H<sub>8</sub>NS<sup>+</sup> [M-OTf]<sup>+</sup>: 210.0372, found (ESI) 210.0365.

## 3. Preparation of substrates

Anilines **S1**, **S2**, **S3**, **S4**, **S5**, **S6**, **S7**, **S8**, **S9**, **S10**, **S11**, **S27**, carbazole **S12**, amine **S13**, thiols **S14**, **S15**, **S16**, **S17**, **S18**, silyl enol ether **S20**, alkene **S21**, pyrrole **S22**, indoles **S25**, **39**, **42**, 3*H*-benzo[*e*]indole **44**, and arenes **S26**, **S28** are commercially available and used as received. Silyl enol ether **S19** is commercially available and was freshly distilled before use. Indoles **S23**,<sup>[2]</sup> **S24**<sup>[3]</sup> were prepared according to the previously reported literature procedures.

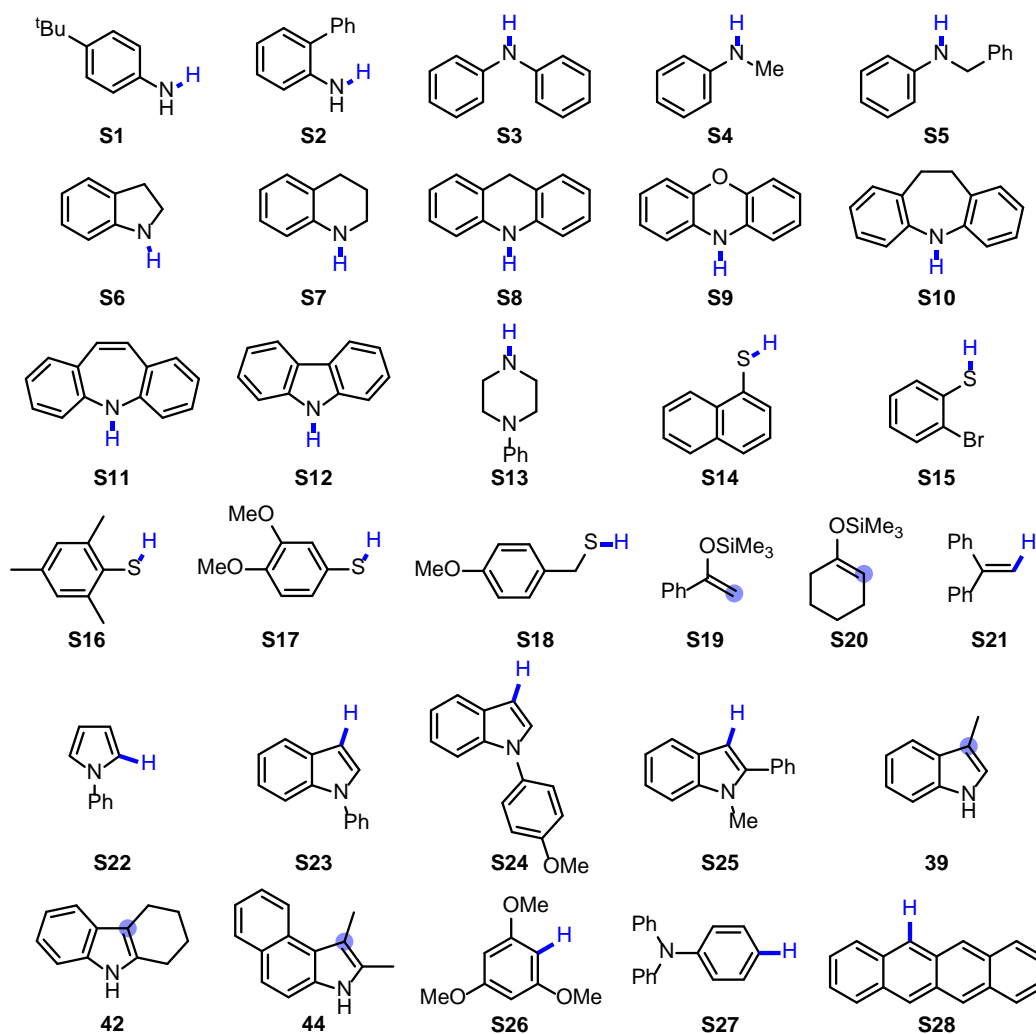

Tryptamine derivatives **S29**,<sup>[4]</sup> **S30**,<sup>[5]</sup> **S31**,<sup>[6]</sup> **S32**,<sup>[7]</sup> **S35**,<sup>[8]</sup> **S36**,<sup>[9]</sup> **S38**,<sup>[5]</sup> tryptophol derivatives **S40**,<sup>[10]</sup> **S41**,<sup>[10]</sup> **S42**,<sup>[11]</sup> and indole derivatives **S44**,<sup>[12]</sup> **S48**,<sup>[13]</sup> **S49**<sup>[13]</sup> were prepared according to the previously reported literature procedures. Tryptophol **S39** is commercially available and used as received. Tryptamine derivatives **S33**, **S34**, **S37** and indole derivatives **S43**, **S45**, **S46**, **S47**, **S50**, **S51** were prepared according to the following procedure:

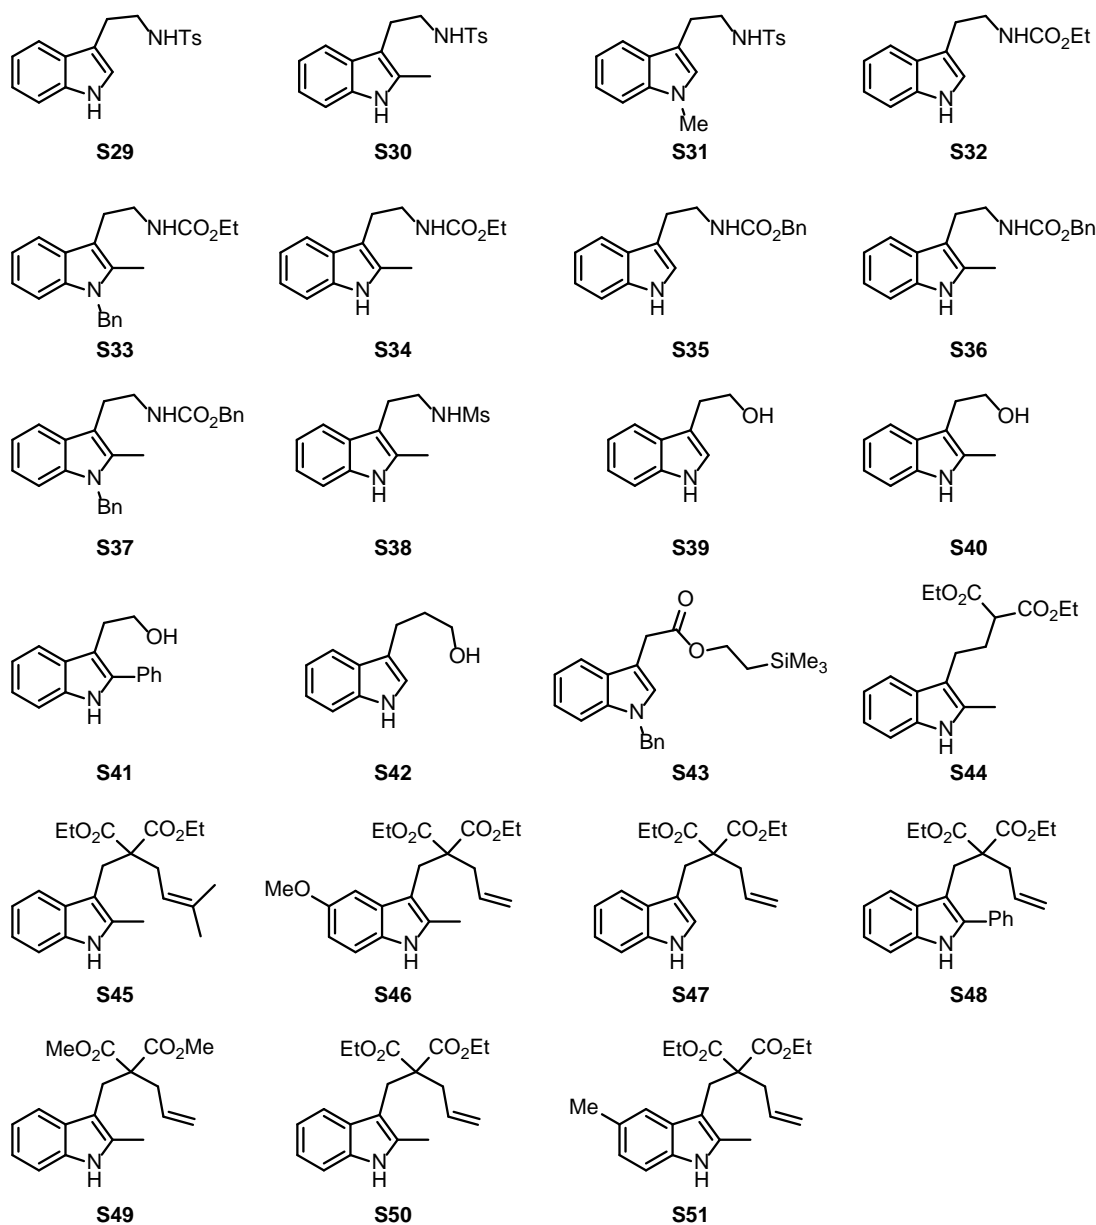

### Procedure for the preparation of S34

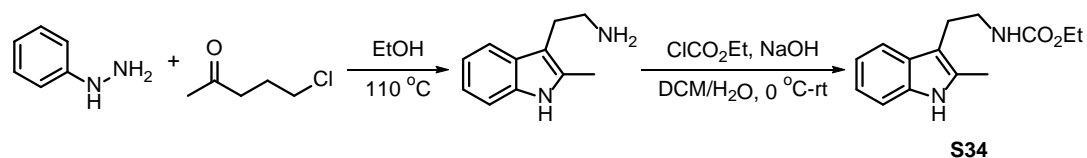

In a sealed tube, 5-chloropentan-2-one (20 mmol, 2.0 equiv, 2.29 mL) was added dropwise to a solution of phenylhydrazine (1.0 equiv., 10 mmol, 985  $\mu$ L) in ethanol (30 mL) at room temperature. The resulting mixture was stirred at 110  $^{\circ}$ C for 10 h. After cooling to room temperature, the solvent was removed under vacuum. Then, DCM (20 mL) and NaOH aqueous (800 mg NaOH dissolved in 20 mL H<sub>2</sub>O) was added. The resulting mixture was

stirred at 0 °C for 5 minutes. Then, ethyl chloroformiate (952  $\mu\text{L}$ , 10 mmol, 1.0 equiv) was added to the mixture dropwise at 0 °C and the resulting mixture was stirred at room temperature for 5 h. The solution thus obtained was extracted with DCM, washed with brine and dried over anhydrous  $\text{Na}_2\text{SO}_4$ . Solvent evaporation from the organic phase under the reduced pressure afforded a residue, which was purified by column chromatography on silica gel (eluent: hexane/ethyl acetate = 4:1) to afford **S34** (1.53 g, 62% overall yield) as a colorless dense oil.  $^1\text{H}$  NMR (400 MHz,  $\text{DMSO-}d_6$ , 100 °C)  $\delta$  = 10.34 (bs, 1H), 7.45 – 7.38 (m, 1H), 7.25-7.22 (m, 1H), 7.01 – 6.89 (m, 2H), 6.52 (bs, 1H), 4.02 (q,  $J$  = 7.2 Hz, 2H), 3.25 – 3.13 (m, 2H), 2.85 – 2.76 (m, 2H), 2.34 (s, 3H), 1.17 (t,  $J$  = 7.2 Hz, 3H).  $^{13}\text{C}$  NMR (101 MHz,  $\text{DMSO-}d_6$ , 100 °C)  $\delta$  = 155.7, 135.0, 131.5, 128.1, 119.3, 117.5, 116.7, 109.8, 107.2, 58.9, 40.9, 24.1, 14.0, 10.5. IR (neat): 3398, 3318, 2979, 2931, 1623, 1517, 1461, 1436, 1383, 1337, 1300, 1171, 1138, 1107, 1077, 1032, 1010, 955, 873, 778, 671, 584, 565, 507  $\text{cm}^{-1}$ ; HRMS calculated  $m/z$  for  $\text{C}_{14}\text{H}_{19}\text{N}_2\text{O}_2^+$   $[\text{M}+\text{H}]^+$ : 247.1441, found (ESI) 247.1444.

### Procedure for the preparation of **S33**

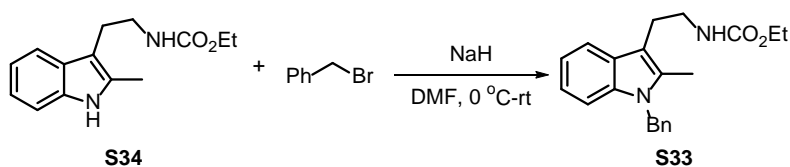

To a stirred solution of **S34** (665 mg, 2.70 mmol, 1.0 equiv) in DMF (20 mL), NaH (w/w 60% in mineral oil, 119 mg, 2.97 mmol, 1.1 equiv) was added under nitrogen flow. The resulting mixture was stirred at 0 °C for 0.5 h, Then, benzyl bromide (353  $\mu\text{L}$ , 2.97 mmol, 1.1 equiv) was added to the mixture dropwise. The resulting mixture was stirred at room temperature for 4 h. The reaction was quenched with water, extracted with ethyl acetate and dried over  $\text{Na}_2\text{SO}_4$ . Evaporation of the organic solvent under the reduced pressure afforded a residue, which was purified by column chromatography on silica gel (eluent: hexane/ethyl acetate = 8:1) to afford **S33** (375 mg, 41% yield) as a light yellow sticky oil.  $^1\text{H}$  NMR (400 MHz,  $\text{DMSO-}d_6$ , 100 °C)  $\delta$  = 7.55 – 7.50 (m, 1H), 7.31 – 7.24 (m, 3H), 7.24 – 7.18 (m, 1H), 7.06 – 6.97 (m, 4H), 6.56 (s, 1H), 5.36 (s, 2H), 4.01 (q,  $J$  = 7.2 Hz, 2H), 3.28 – 3.16 (m, 2H), 2.90-2.87 (m, 2H), 2.32 (s, 3H), 1.16 (t,  $J$  = 7.2 Hz, 3H).  $^{13}\text{C}$  NMR (101 MHz,  $\text{DMSO-}d_6$ , 100

$^{\circ}\text{C}$ )  $\delta = 155.7, 138.0, 135.9, 132.9, 127.9, 127.4, 126.3, 125.6, 119.8, 118.1, 117.0, 108.7, 108.1, 58.9, 45.5, 40.9, 24.4, 14.0, 9.2$ . IR (neat): 3352, 2978, 2929, 1689, 1612, 1536, 1495, 1468, 1452, 1417, 1336, 1287, 1250, 1204, 1177, 1139, 1090, 1035, 980, 924, 878, 776, 737, 694, 608, 561, 520  $\text{cm}^{-1}$ ; HRMS calculated  $m/z$  for  $\text{C}_{21}\text{H}_{25}\text{N}_2\text{O}_2^+$   $[\text{M}+\text{H}]^+$ : 337.1911, found (ESI) 337.1917.

### Procedure for the preparation of **S37**

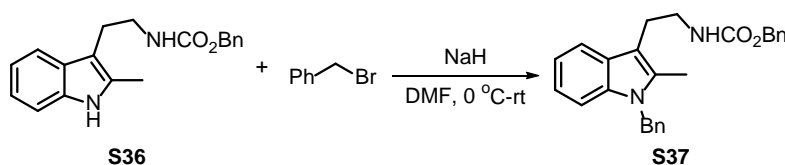

To a stirred solution of **S36**<sup>[9]</sup> (2.22 g, 7.20 mmol, 1.0 equiv) in DMF (50 mL), NaH (w/w 60% in mineral oil, 317 mg, 7.92 mmol, 1.1 equiv) was added under nitrogen flow. The resulting mixture was stirred at 0  $^{\circ}\text{C}$  for 0.5 h. Then, benzyl bromide (856  $\mu\text{L}$ , 7.20 mmol, 1.0 equiv) was added to the mixture dropwise. The resulting mixture was stirred at room temperature for 10 h. The reaction was quenched with water, extracted with ethyl acetate, dried over  $\text{Na}_2\text{SO}_4$ . The solvent was evaporated under the reduced pressure and the residue was purified by column chromatography on silica gel (eluent: hexane/ethyl acetate = 20:1 to 10:1) to afford **S37** (1.30 g, 45% yield) as a light yellow sticky oil.  $^1\text{H}$  NMR (400 MHz,  $\text{DMSO}-d_6$ , 100  $^{\circ}\text{C}$ )  $\delta = 7.54 - 7.48$  (m, 1H), 7.45 - 7.08 (m, 9H), 7.06 - 6.95 (m, 4H), 6.80 (s, 1H), 5.36 (s, 2H), 5.05 (s, 2H), 3.31 - 3.21 (m, 2H), 2.92-2.89 (m, 2H), 2.30 (s, 3H).  $^{13}\text{C}$  NMR (101 MHz,  $\text{DMSO}-d_6$ , 100  $^{\circ}\text{C}$ )  $\delta = 155.5, 137.9, 136.9, 135.9, 132.9, 127.9, 127.6, 127.4, 127.0, 126.9, 126.3, 125.6, 119.8, 118.1, 117.0, 108.7, 108.1, 64.7, 45.5, 41.0, 24.4, 9.2$ . IR (neat): 3380, 2942, 1693, 1532, 1496, 1468, 1453, 1336, 1286, 1242, 1179, 1135, 1002, 737, 697, 608, 555  $\text{cm}^{-1}$ ; HRMS calculated  $m/z$  for  $\text{C}_{26}\text{H}_{27}\text{N}_2\text{O}_2^+$   $[\text{M}+\text{H}]^+$ : 399.2067, found (ESI) 399.2068.



### Procedure for the preparation of S43

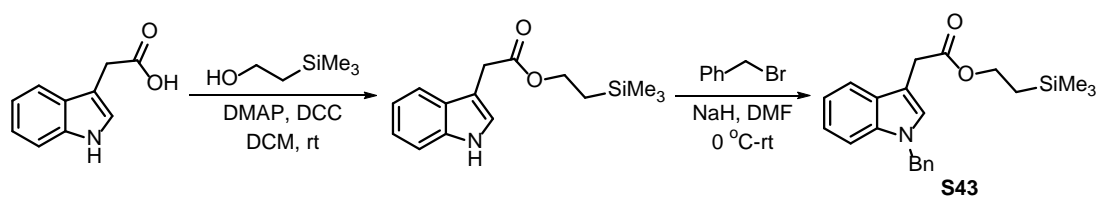

To a stirred solution of indole-3-acetic acid (876 mg, 5.0 mmol, 1.0 equiv) in DCM (25 mL) was added 4-dimethylaminepyridine (30.5 mg, 0.25 mmol, 0.05 equiv), dicyclohexylcarbodiimide (1.135 g, 5.5 mmol, 1.1 equiv) and 2-(trimethylsilyl)ethan-1-ol (1.43 mL, 10 mmol, 2.0 equiv), sequentially. The resulting mixture was stirred at room temperature for 28 h. Then, the reaction mixture was filtered through a pad of celite. The obtained organic phase was washed with water and dried over Na<sub>2</sub>SO<sub>4</sub>. The solvent was evaporated under reduced pressure and the residue purified by column chromatography on silica gel (eluent: hexane/ethyl acetate = 10:1) to afford 2-(trimethylsilyl)ethyl 2-(1*H*-indol-3-yl)acetate.<sup>[14]</sup>

To a stirred solution of 2-(trimethylsilyl)ethyl 2-(1*H*-indol-3-yl)acetate (1.19 g, 4.33 mmol, 1.0 equiv) in DMF (25 mL), NaH (w/w 60% in mineral oil, 190 mg, 4.76 mmol, 1.1 equiv) was added under nitrogen. The resulting mixture was stirred at 0 °C for 0.5 h. Then, benzyl bromide (540 μL, 4.54 mmol, 1.05 equiv) was added to the mixture dropwise. The resulting reaction mixture was stirred at room temperature for 4 h and subsequently quenched with water and extracted with ethyl acetate. The organic phase was dried over Na<sub>2</sub>SO<sub>4</sub>, the solvent evaporated under the reduced pressure and finally the residue was purified by column chromatography on silica gel (eluent: hexane/ethyl acetate = 50:1) to afford **S43** (656 mg, 41% yield) as a colorless oil.

<sup>1</sup>H NMR (400 MHz, Chloroform-*d*) δ = 7.68 (d, *J* = 8.0 Hz, 1H), 7.36-7.27 (m, 4H), 7.26 – 7.11 (m, 5H), 5.32 (s, 2H), 4.31 – 4.19 (m, 2H), 3.80 (s, 2H), 1.06-1.02 (m, 2H), 0.06 (s, 9H). <sup>13</sup>C NMR (101 MHz, Chloroform-*d*) δ = 172.3, 137.6, 136.7, 128.9, 128.1, 127.7, 127.2, 127.0, 122.0, 119.5, 119.3, 109.8, 107.9, 63.1, 50.1, 31.7, 17.5, -1.4. IR (neat): 2952, 1727, 1614, 1496, 1467, 1454, 1357, 1334, 1248, 1147, 1041, 1014, 963, 857, 834, 735, 695, 608, 551 cm<sup>-1</sup>; HRMS calculated *m/z* for C<sub>22</sub>H<sub>28</sub>NO<sub>2</sub>Si<sup>+</sup> [M+H]<sup>+</sup>: 366.1884, found (ESI) 366.1878.

### Procedure for the preparation of S45<sup>[15][16][17]</sup>

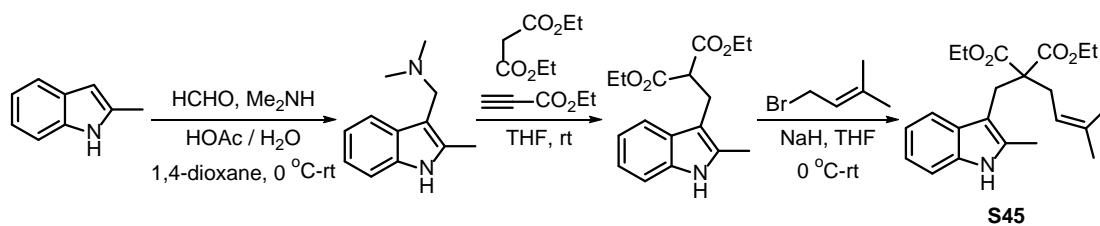

To a stirred solution of formaldehyde (37 wt% in water, 1.65 mL, 22 mmol, 1.1 equiv.) in 1,4-dioxane (100 mL) water (1.54 mL) and glacial acetic acid (20 mL) were added sequentially. The resulting solution was stirred at 0 °C for 5 minutes. Then, dimethylamine (40 wt% in water, 2.73 mL, 22 mmol, 1.1 equiv.) and 2-methyl-1*H*-indole (2.624, 20 mmol, 1.0 equiv.) were added to the mixture, sequentially. The mixture was stirred at 0 °C for 2 h, and for further 5 hours at room temperature. Then, the reaction was treated with NaOH aqueous (16 g NaOH dissolved in 200 mL H<sub>2</sub>O) at 0 °C. The resulting mixture was extracted with ethyl acetate, and the organic phase was washed with brine and dried over anhydrous Na<sub>2</sub>SO<sub>4</sub>. Evaporation of the solvent under the reduced pressure afforded a residue, which was used directly for the next step without further purification.<sup>[15]</sup>

Diethyl malonate (3.04 mL, 20 mmol, 1.0 equiv.) and ethyl propionate (2.03 mL, 20 mmol, 1.0 equiv.) were added sequentially to a stirred solution of the above residue in THF (100 mL). The resulting solution was stirred at room temperature for 12 h. Then, the reaction was quenched with water, extracted with ethyl acetate and the organic phase dried over anhydrous Na<sub>2</sub>SO<sub>4</sub>. Evaporation of the solvent under reduced pressure afforded a residue, which was purified by column chromatography on silica gel (eluent: hexane/ethyl acetate = 8:1) to afford diethyl 2-((2-methyl-1*H*-indol-3-yl)methyl)malonate.<sup>[16]</sup>

NaH (w/w 60% in mineral oil, 120 mg, 3.0 mmol, 1.0 equiv) was added at 0 °C under nitrogen flow to a stirred solution of diethyl 2-((2-methyl-1*H*-indol-3-yl)methyl)malonate (910 mg, 3.0 mmol, 1.0 equiv) in THF (15 mL).<sup>[17]</sup> The resulting mixture was stirred at that temperature for 0.5 h. Then, 1-bromo-3-methylbut-2-ene (347 μL, 3.0 mmol, 1.0 equiv) was added to the mixture dropwise and the resulting solution was stirred at room temperature for 2 h. Then, it was quenched with saturated NH<sub>4</sub>Cl (aq) and extracted with ethyl acetate. The organic phase was finally dried over anhydrous Na<sub>2</sub>SO<sub>4</sub> and the solvent evaporated under reduced pressure. Compound **S45** (931 mg, 84% yield) was obtained as a light yellow sticky

oil after purification by column chromatography on silica gel (eluent: hexane/ethyl acetate = 8:1 to 4:1).

$^1\text{H}$  NMR (400 MHz, Chloroform-*d*)  $\delta$  = 7.84 (bs, 1H), 7.44 (d,  $J$  = 7.6, 1H), 7.19-7.16 (m, 1H), 7.07-6.98 (m, 2H), 5.27 – 5.19 (m, 1H), 4.17 – 4.00 (m, 4H), 3.40 (s, 2H), 2.59 (d,  $J$  = 6.8 Hz, 2H), 2.30 (s, 3H), 1.74 (d,  $J$  = 1.6 Hz, 3H), 1.57 (s, 3H), 1.17 (t,  $J$  = 7.2 Hz, 6H).  $^{13}\text{C}$  NMR (101 MHz, Chloroform-*d*)  $\delta$  = 172.0, 135.3, 135.2, 133.4, 129.6, 121.0, 119.1, 118.7, 118.7, 110.1, 106.4, 61.2, 59.1, 31.6, 27.9, 26.2, 18.3, 14.0, 12.2. IR (neat): 3350, 2979, 1750, 1713, 1493, 1462, 1444, 1366, 1323, 1297, 1248, 1211, 1175, 1117, 1096, 1071, 1053, 1026, 858, 816, 740, 665, 624, 567, 542, 517  $\text{cm}^{-1}$ ; HRMS calculated  $m/z$  for  $\text{C}_{22}\text{H}_{30}\text{NO}_4^+$   $[\text{M}+\text{H}]^+$ : 372.2169, found (ESI) 372.2164.

### Procedure for the preparation of S46

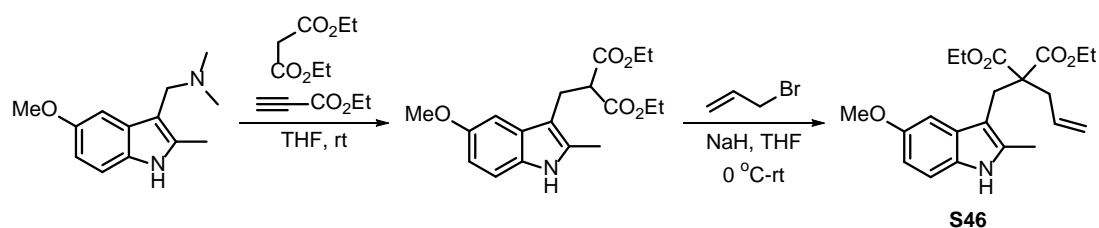

Diethyl malonate (911  $\mu\text{L}$ , 6.0 mmol, 1.0 equiv.) and ethyl propiolate (669  $\mu\text{L}$ , 6.6 mmol, 1.1 equiv.), were added sequentially to a stirred solution of 1-(5-methoxy-2-methyl-1H-indol-3-yl)-*N,N*-dimethylmethanamine (1.44 g, 6.6 mmol, 1.1 equiv.) in THF (30 mL). The resulting solution was stirred at room temperature for 18 h. Then, the reaction was quenched with water, extracted with ethyl acetate, washed with brine, and the organic phase was dried over anhydrous  $\text{Na}_2\text{SO}_4$ . Evaporation of the solvent under reduced pressure afforded a residue, which was purified by column chromatography on silica gel (hexane/ethyl acetate = 4:1) to afford diethyl 2-((5-methoxy-2-methyl-1H-indol-3-yl)methyl)malonate.<sup>[16]</sup>

NaH (w/w 60% in mineral oil, 198 mg, 4.94 mmol, 1.1 equiv) was added to a stirred solution of diethyl 2-((5-methoxy-2-methyl-1H-indol-3-yl)methyl)malonate (1.50 g, 4.49 mmol, 1.0 equiv) in THF (15 mL) at 0 °C under nitrogen. The resulting mixture was stirred at 0 °C for 0.5 h; then, allyl bromide (427  $\mu\text{L}$ , 4.94 mmol, 1.1 equiv) was added to the mixture dropwise and the resulting mixture stirred at room temperature for 3 h. Then, the reaction was quenched with water, extracted with ethyl acetate and the organic phase was dried over anhydrous

Na<sub>2</sub>SO<sub>4</sub>. Evaporation of the solvent under the reduced pressure let a residue, which was purified by column chromatography on silica gel (eluent: hexane/ethyl acetate = 5:1) to afford **S46** (1.19 g, 71% yield) as a light yellow sticky oil. <sup>1</sup>H NMR (400 MHz, Chloroform-*d*) δ = 7.77 (bs, 1H), 7.07 (d, *J* = 8.4 Hz, 1H), 6.96 (d, *J* = 2.4 Hz, 1H), 6.72 (dd, *J* = 8.4, 2.4 Hz, 1H), 5.98-5.88 (m, 1H), 5.20 – 5.04 (m, 2H), 4.21 – 3.98 (m, 4H), 3.82 (s, 3H), 3.37 (s, 2H), 2.66 (d, *J* = 7.2 Hz, 2H), 2.30 (s, 3H), 1.16 (t, *J* = 7.2 Hz, 6H). <sup>13</sup>C NMR (101 MHz, Chloroform-*d*) δ = 171.7, 153.9, 134.3, 133.5, 130.4, 130.0, 118.7, 110.8, 110.8, 106.2, 101.5, 61.3, 59.4, 56.1, 37.9, 28.5, 14.1, 12.5. IR (neat): 3360, 2936, 1747, 1716, 1590, 1487, 1449, 1365, 1303, 1254, 1200, 1093, 1045, 1010, 967, 930, 891, 867, 843, 829, 792, 775, 745, 690, 670, 626, 583, 541 cm<sup>-1</sup>; HRMS calculated *m/z* for C<sub>21</sub>H<sub>28</sub>NO<sub>5</sub><sup>+</sup> [M+H]<sup>+</sup>: 374.1962, found (ESI) 374.1963.

### Procedure for the preparation of **S47**

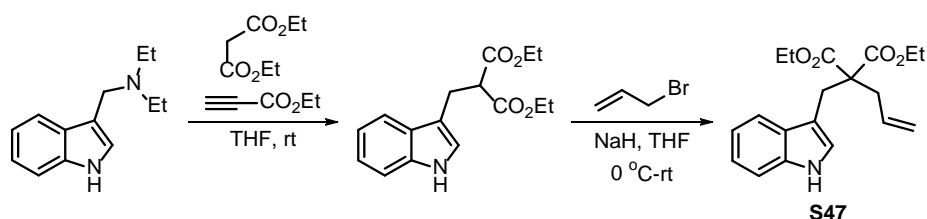

Diethyl malonate (1.52 mL, 10 mmol, 1.0 equiv.) and ethyl propiolate (1.114 mL, 11 mmol, 1.1 equiv.) were subsequently added to a stirred solution of *N*-((1*H*-indol-3-yl)methyl)-*N*-ethylethanamine (2.225 g, 11 mmol, 1.1 equiv.) in THF (30 mL). The resulting solution was stirred at room temperature for 16 h, and then the reaction was quenched with water, extracted with ethyl acetate and the organic phase dried over anhydrous Na<sub>2</sub>SO<sub>4</sub>. The organic solvent was evaporated under reduced pressure and the residue obtained was used directly for the next step without further purification.

NaH (w/w 60% in mineral oil, 400 mg, 10.0 mmol, 1.0 equiv) was added at 0 °C under nitrogen to a stirred solution of the above residue in THF (50 mL). The resulting mixture was stirred at 0 °C for 0.5 h and then, allyl bromide (865 μL, 10.0 mmol, 1.0 equiv) was added to the mixture dropwise. The solution thus obtained was stirred at room temperature for 1 h and then quenched with water and extracted with ethyl acetate. The organic phase was subsequently dried over anhydrous Na<sub>2</sub>SO<sub>4</sub> and the solvent evaporated under the reduced pressure. The residue obtained was purified by column chromatography on silica gel (eluent:

hexane/ethyl acetate = 10:1) to afford **S47** (976 mg, 30% yield) as a light yellow sticky oil.  $^1\text{H}$  NMR (400 MHz, Chloroform-*d*)  $\delta$  = 8.10 (bs, 1H), 7.58-7.55 (m, 1H), 7.32-7.29 (m, 1H), 7.17-7.13 (m, 1H), 7.10-7.06 (m, 1H), 6.98 (d,  $J$  = 2.8 Hz, 1H), 5.92 – 5.72 (m, 1H), 5.17 – 5.13 (m, 1H), 5.13 – 5.07 (m, 1H), 4.20 – 4.12 (m, 2H), 4.12 – 4.03 (m, 2H), 3.42 (d,  $J$  = 0.8 Hz, 2H), 2.68 (dt,  $J$  = 7.6, 1.6 Hz, 2H), 1.19 (t,  $J$  = 7.2 Hz, 6H).  $^{13}\text{C}$  NMR (101 MHz, Chloroform-*d*)  $\delta$  = 171.4, 135.9, 133.1, 128.3, 123.3, 122.0, 119.4, 119.1, 119.0, 111.2, 110.2, 61.4, 58.9, 37.4, 28.0, 14.1. IR (neat): 3347, 2976, 1752, 1714, 1641, 1459, 1444, 1361, 1290, 1245, 1193, 1151, 1097, 1066, 1039, 1017, 916, 860, 803, 745, 656, 614, 578, 563, 545  $\text{cm}^{-1}$ ; HRMS calculated  $m/z$  for  $\text{C}_{19}\text{H}_{24}\text{NO}_4^+$   $[\text{M}+\text{H}]^+$ : 330.1700, found (ESI) 330.1701.

### Procedure for the preparation of **S50**

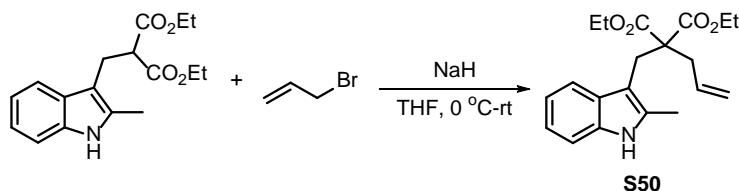

NaH (w/w 60% in mineral oil, 120 mg, 3.0 mmol, 1.0 equiv) was added at 0 °C under nitrogen to a stirred solution of diethyl 2-((2-methyl-1*H*-indol-3-yl)methyl)malonate (910 mg, 3.0 mmol, 1.0 equiv) in THF (15 mL). The resulting mixture was stirred at 0 °C for 0.5 h. and then allyl bromide (260  $\mu\text{L}$ , 3.0 mmol, 1.0 equiv) was added dropwise and stirred at room temperature for two additional hours. Then, the reaction was quenched with saturated  $\text{NH}_4\text{Cl}$  solution, extracted with ethyl acetate and the organic phase was dried over anhydrous  $\text{Na}_2\text{SO}_4$ . Evaporation of the solvent under reduced pressure afforded a residue, which was purified by column chromatography on silica gel (eluent: hexane/ethyl acetate = 10:1 to 5:1) to afford **S50** (852 mg, 83% yield) as a light yellow sticky oil.  $^1\text{H}$  NMR (400 MHz, Chloroform-*d*)  $\delta$  = 7.82 (bs, 1H), 7.46 (d,  $J$  = 7.6, 1H), 7.22-7.19 (m, 1H), 7.12 – 6.98 (m, 2H), 5.97-5.87 (m, 1H), 5.20 – 5.01 (m, 2H), 4.25 – 3.93 (m, 4H), 3.40 (s, 2H), 2.66-2.64 (m, 2H), 2.34 (s, 3H), 1.17 (t,  $J$  = 7.2 Hz, 6H).  $^{13}\text{C}$  NMR (101 MHz, Chloroform-*d*)  $\delta$  = 171.6, 135.3, 133.5, 133.4, 129.6, 121.1, 119.2, 118.7, 118.7, 110.1, 110.1, 106.4, 61.3, 59.4, 38.0, 28.4, 14.1, 12.5. IR (neat): 3372, 2981, 1743, 1713, 1491, 1462, 1440, 1392, 1366, 1297, 1198, 1158, 1120, 1096, 1062,

1046, 1020, 946, 862, 744, 690, 667, 611, 579, 564, 515  $\text{cm}^{-1}$ ; HRMS calculated  $m/z$  for  $\text{C}_{20}\text{H}_{26}\text{NO}_4^+$   $[\text{M}+\text{H}]^+$ : 344.1856, found (ESI) 344.1856.

### Procedure for the preparation of S51

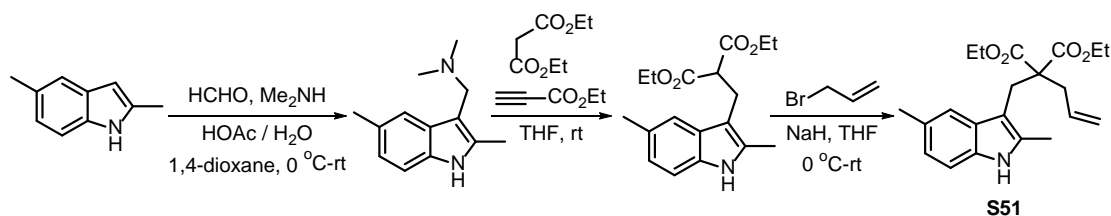

To a stirred solution of formaldehyde (37 wt% in water, 825  $\mu\text{L}$ , 11 mmol, 1.1 equiv.) in 1,4-dioxane (50 mL) water (770  $\mu\text{L}$ ) and glacial acetic acid (10 mL) were added sequentially. The resulting solution was stirred at 0  $^{\circ}\text{C}$  for 5 minutes. Then, dimethylamine (40 wt% in water, 1.365 mL, 11 mmol, 1.1 equiv.) and 2,5-dimethyl-1*H*-indole (1.452, 10 mmol, 1.0 equiv.) were added and the mixture stirred 2 h at 0 $^{\circ}\text{C}$  and 10 additional hours at room temperature. Then, the reaction was treated with aqueous NaOH solution (8 g NaOH dissolved in 100 mL  $\text{H}_2\text{O}$ ) at 0  $^{\circ}\text{C}$  and the resulting mixture extracted with ethyl acetate and washed with brine. The organic solvents were dried over anhydrous  $\text{Na}_2\text{SO}_4$  and evaporated under reduced pressure. The residue thus obtained was used directly for the next step without further purification.<sup>[15]</sup>

Diethyl malonate (1.52 mL, 10 mmol, 1.0 equiv.) and ethyl propiolate (1.013 mL, 10 mmol, 1.0 equiv.), were sequentially added to a stirred solution of the above prepared residue in THF (30 mL). The resulting solution was stirred at room temperature for 12 h. Then, the reaction was quenched with water, extracted with ethyl acetate and the organic phase dried over anhydrous  $\text{Na}_2\text{SO}_4$ . Evaporation of the solvents under reduced pressure afforded a residue, which was purified by column chromatography on silica gel (eluent: hexane/ethyl acetate = 8:1 to 4:1) to afford diethyl 2-((2,5-dimethyl-1*H*-indol-3-yl)methyl)malonate.<sup>[16]</sup>

Finally, NaH (w/w 60% in mineral oil, 268 mg, 6.7 mmol, 1.0 equiv) was added at 0  $^{\circ}\text{C}$  to a stirred solution of diethyl 2-((2,5-dimethyl-1*H*-indol-3-yl)methyl)malonate (2.127 g, 6.7 mmol, 1.0 equiv) in THF (30 mL).<sup>[17]</sup> The resulting mixture was stirred at 0  $^{\circ}\text{C}$  for 0.5 h. and then allyl bromide (580  $\mu\text{L}$ , 6.7 mmol, 1.0 equiv) was added to the mixture dropwise. The resulting mixture was stirred at room temperature for 2 h. and then the reaction was quenched

with saturated  $\text{NH}_4\text{Cl}$  (aq), extracted with ethyl acetate, and the organic phase dried over anhydrous  $\text{Na}_2\text{SO}_4$ . Evaporation of the solvents in vacuo afforded a residue, which was purified by column chromatography on silica gel (eluent: hexane/ethyl acetate = 10:1 to 5:1) to afford **S51** (1.378 g, 58% yield) as a light yellow sticky oil.  $^1\text{H}$  NMR (400 MHz, Chloroform-*d*)  $\delta$  = 7.78 (bs, 1H), 7.223-7.217 (m, 1H), 7.05 (d,  $J$  = 8.0 Hz, 1H), 6.88 (dd,  $J$  = 8.0, 1.6 Hz, 1H), 5.96-5.86 (m, 1H), 5.19 – 5.05 (m, 2H), 4.20 – 4.01 (m, 4H), 3.37 (s, 2H), 2.65-2.63 (m, 2H), 2.40 (s, 3H), 2.27 (s, 3H), 1.19 (t,  $J$  = 7.2 Hz, 6H).  $^{13}\text{C}$  NMR (101 MHz, Chloroform-*d*)  $\delta$  = 171.6, 133.6, 133.6, 129.7, 128.1, 122.5, 118.6, 118.4, 109.8, 105.7, 61.2, 59.3, 37.8, 28.4, 21.6, 14.1, 12.5. IR (neat): 3346, 2978, 1746, 1714, 1590, 1440, 1366, 1299, 1200, 1148, 1093, 1060, 1042, 1023, 928, 861, 790, 754, 694, 670, 639, 604, 558, 517  $\text{cm}^{-1}$ ; HRMS calculated  $m/z$  for  $\text{C}_{21}\text{H}_{28}\text{NO}_4^+$   $[\text{M}+\text{H}]^+$ : 358.2013, found (ESI) 358.2018.

#### 4. Direct metal-free cyanation of nucleophiles using **9**

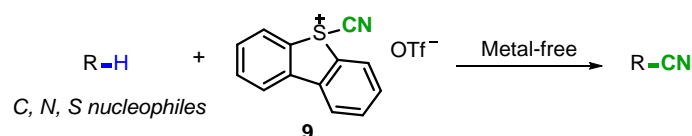

#### Procedure for the preparation of **11**

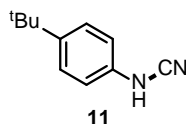

To a stirred solution of 4-(*tert*-butyl)aniline **S1** (31.9  $\mu\text{L}$ , 0.2 mmol, 1.0 equiv) in DCM (2 mL) was added  $\text{K}_3\text{PO}_4$  (42.5 mg, 0.2 mmol, 1.0 equiv) and **9** (107.8 mg, 0.3 mmol, 1.5 equiv) at 0  $^\circ\text{C}$  under nitrogen flow, sequentially. The resulting mixture was stirred at 0  $^\circ\text{C}$  for 2 h. Then, the reaction was quenched with water, extracted with DCM and the organic phase was dried over anhydrous  $\text{Na}_2\text{SO}_4$ . Evaporation of the solvent under the reduced pressure produced a residue, which was purified by column chromatography on silica gel (eluent: hexane to hexane/ethyl acetate = 20:1) to afford **11** (25.2 mg, 72% yield) as a colorless oil.  $^1\text{H}$  NMR (400 MHz, Chloroform-*d*)  $\delta$  = 7.35 (d,  $J$  = 8.4 Hz, 2H), 6.96 (d,  $J$  = 8.4 Hz, 2H), 6.61 (bs, 1H), 1.29 (s, 9H).  $^{13}\text{C}$  NMR (101 MHz, Chloroform-*d*)  $\delta$  = 146.8, 134.7, 126.7, 115.3, 111.9, 34.4, 31.5. The spectroscopic data are in agreement with those previously reported.<sup>[18]</sup>

## Procedure for the preparation of **12**

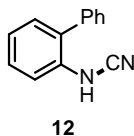

To a stirred solution of [1,1'-biphenyl]-2-amine **S2** (33.8 mg, 0.2 mmol, 1.0 equiv) in DCM (2 mL),  $K_3PO_4$  (42.5 mg, 0.2 mmol, 1.0 equiv) and **9** (107.8 mg, 0.3 mmol, 1.5 equiv) were added sequentially at  $-10\text{ }^\circ\text{C}$ . The resulting mixture was stirred at  $-10\text{ }^\circ\text{C}$  for 4 h. and then the reaction was quenched with brine, extracted with DCM, and the organic phase dried over anhydrous  $Na_2SO_4$ . Evaporation of the solvent under reduced pressure afforded a residue, which was purified by column chromatography on silica gel (eluent: hexane to hexane/ethyl acetate = 10:1) to afford **12** (37.7 mg, 97% yield) as a white solid.  $^1H$  NMR (300 MHz, Chloroform-*d*)  $\delta$  = 7.54 – 7.45 (m, 2H), 7.45 – 7.26 (m, 5H), 7.24-7.21 (m, 1H), 7.18 – 7.09 (m, 1H), 5.96 (bs, 1H).  $^{13}C$  NMR (75 MHz, Chloroform-*d*)  $\delta$  = 136.7, 134.2, 130.7, 129.6, 129.3, 129.2, 129.1, 128.5, 123.7, 115.2, 110.7. The spectroscopic data are in agreement with those previously reported.<sup>[19]</sup>

## General procedure for the preparation of **13-21**

$Cs_2CO_3$  (65.2 mg, 0.2 mmol, 1.0 equiv) and **9** (107.8 mg, 0.3 mmol, 1.5 equiv) were added sequentially at room temperature to a stirred solution of the desired aniline (0.2 mmol, 1.0 equiv) in DCM (2 mL). The resulting mixture was stirred at room temperature for 1.5-8 hours. Then, the reaction was quenched with brine, extracted with DCM, and the organic phase dried over anhydrous  $Na_2SO_4$ . Evaporation of the solvent under reduced pressure afforded a residue, which was purified by column chromatography on silica gel.

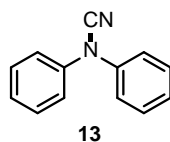

A mixture of diphenylamine **S3** (0.2 mmol, 33.8 mg),  $Cs_2CO_3$  (0.02 mmol, 65.2 mg) and **9** (0.3 mmol, 107.8 mg) in DCM (2 mL) was stirred at room temperature for 6 h. Column chromatography on silica gel (eluent: hexane to hexane/ethyl acetate = 9:1) afforded **13** in 98%



yield (38.0 mg) as a colorless oil.  $^1\text{H}$  NMR (300 MHz, Chloroform-*d*)  $\delta$  = 7.46 – 7.36 (m, 4H), 7.33 – 7.18 (m, 6H).  $^{13}\text{C}$  NMR (75 MHz, Chloroform-*d*)  $\delta$  = 139.2, 130.0, 126.4, 121.4, 112.7. The spectroscopic data are in agreement with those previously reported.<sup>[20]</sup>

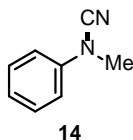

A mixture of *N*-methylaniline **S4** (0.2 mmol, 21.7  $\mu\text{L}$ ),  $\text{Cs}_2\text{CO}_3$  (0.02 mmol, 65.2 mg) and **9** (0.3 mmol, 107.8 mg) in DCM (2 mL) was stirred at room temperature for 1.5 h. Column chromatography on silica gel (eluent: hexane to hexane/ethyl acetate = 4:1) afforded **14** in 90% yield (23.7 mg) as a colorless oil.  $^1\text{H}$  NMR (300 MHz, Chloroform-*d*)  $\delta$  = 7.45 – 7.31 (m, 2H), 7.17 – 7.02 (m, 3H), 3.33 (s, 3H).  $^{13}\text{C}$  NMR (75 MHz, Chloroform-*d*)  $\delta$  = 140.4, 129.7, 123.4, 114.9, 114.2, 36.9. The spectroscopic data are in agreement with those previously reported.<sup>[21]</sup>

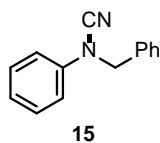

A mixture of *N*-benzylaniline **S5** (0.2 mmol, 36.7 mg),  $\text{Cs}_2\text{CO}_3$  (0.02 mmol, 65.2 mg) and **9** (0.3 mmol, 107.8 mg) in DCM (2 mL) was stirred at room temperature for 3 h. Column chromatography on silica gel (eluent: hexane to hexane/ethyl acetate = 9:1) afforded **15** in 91% yield (37.7 mg) as a colorless oil.  $^1\text{H}$  NMR (300 MHz, Chloroform-*d*)  $\delta$  = 7.42 – 7.26 (m, 7H), 7.16 – 7.02 (m, 3H), 4.78 (s, 2H).  $^{13}\text{C}$  NMR (75 MHz, Chloroform-*d*)  $\delta$  = 139.8, 134.4, 129.7, 129.1, 128.6, 127.4, 123.8, 116.1, 114.0, 53.8. The spectroscopic data are in agreement with those previously reported.<sup>[22]</sup>

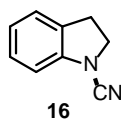

A mixture of indoline **S6** (0.2 mmol, 22.4  $\mu\text{L}$ ),  $\text{Cs}_2\text{CO}_3$  (0.02 mmol, 65.2 mg) and **9** (0.3 mmol, 107.8 mg) in DCM (2 mL) was stirred at room temperature for 2 h. Column

chromatography on silica gel (eluent: hexane to hexane/ethyl acetate = 4:1) afforded **16** in 95% yield (27.3 mg) as a colorless oil.  $^1\text{H}$  NMR (300 MHz, Chloroform-*d*)  $\delta$  = 7.25 – 7.13 (m, 2H), 7.04 – 6.92 (m, 2H), 4.05 (t,  $J$  = 8.4 Hz, 2H), 3.20 (t,  $J$  = 8.4Hz, 2H).  $^{13}\text{C}$  NMR (75 MHz, Chloroform-*d*)  $\delta$  = 142.3, 128.2, 127.9, 125.3, 123.3, 112.6, 110.5, 50.8, 28.6. IR (neat): 3052, 2919, 2858, 2209, 1607, 1595, 1486, 1458, 1441, 1379, 1328, 1278, 1197, 1155, 1083, 1029, 935, 866, 825, 751, 602  $\text{cm}^{-1}$ ; HRMS calculated  $m/z$  for  $\text{C}_9\text{H}_9\text{N}_2^+$   $[\text{M}+\text{H}]^+$ : 145.0760, found (ESI) 145.0766.

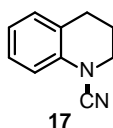

A mixture of 1,2,3,4-tetrahydroquinoline **S7** (0.2 mmol, 26.6 mg),  $\text{Cs}_2\text{CO}_3$  (0.02 mmol, 65.2 mg) and **9** (0.3 mmol, 107.8 mg) in DCM (2 mL) was stirred at room temperature for 3 h. Column chromatography on silica gel (eluent: hexane to hexane/ethyl acetate = 4:1) afforded **17** in 92% yield (29.0 mg) as a colorless oil.  $^1\text{H}$  NMR (300 MHz, Chloroform-*d*)  $\delta$  = 7.24 – 7.13 (m, 2H), 7.09-7.05 (m, 1H), 7.01-6.93 (m, 1H), 3.81 – 3.69 (m, 2H), 2.87 – 2.71 (m, 2H), 2.10 – 1.94 (m, 2H).  $^{13}\text{C}$  NMR (75 MHz, Chloroform-*d*)  $\delta$  = 135.6, 129.8, 127.7, 124.0, 122.9, 115.7, 113.6, 48.6, 26.3, 22.0. IR (neat): 2938, 2212, 1605, 1587, 1495, 1455, 1385, 1347, 1290, 1251, 1229, 1198, 1183, 1167, 1113, 1059, 1017, 937, 909, 876, 848, 794, 747, 713, 690, 612, 532, 504  $\text{cm}^{-1}$ ; HRMS calculated  $m/z$  for  $\text{C}_{10}\text{H}_{11}\text{N}_2^+$   $[\text{M}+\text{H}]^+$ : 159.0917, found (ESI) 159.0918.

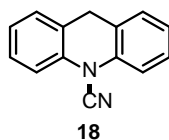

A mixture of 9,10-dihydroacridine **S8** (0.2 mmol, 36.2 mg),  $\text{Cs}_2\text{CO}_3$  (0.02 mmol, 65.2 mg) and **9** (0.3 mmol, 107.8 mg) in DCM (2 mL) was stirred at room temperature for 3 h. Column chromatography on silica gel (eluent: hexane to hexane/ethyl acetate = 19:1) afforded **18** in 88% yield (36.4 mg) as a colorless oil.  $^1\text{H}$  NMR (300 MHz, Chloroform-*d*)  $\delta$  = 7.41-7.37 (m, 2H), 7.32-7.26 (m, 2H), 7.24 – 7.08 (m, 4H), 4.04 (s, 2H).  $^{13}\text{C}$  NMR (75 MHz,

Chloroform-*d*)  $\delta$  = 134.6, 129.0, 128.9, 125.3, 123.3, 115.8, 109.4, 30.6. IR (neat): 2920, 2218, 1721, 1653, 1604, 1581, 1489, 1455, 1426, 1344, 1316, 1298, 1255, 1196, 1168, 1150, 1097, 1045, 958, 933, 922, 857, 800, 743, 687, 667, 636  $\text{cm}^{-1}$ ; HRMS calculated  $m/z$  for  $\text{C}_{14}\text{H}_{11}\text{N}_2^+$   $[\text{M}+\text{H}]^+$ : 207.0917, found (ESI) 207.0917.

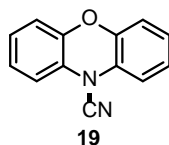

A mixture of 10*H*-phenoxazine **S9** (0.2 mmol, 36.6 mg),  $\text{Cs}_2\text{CO}_3$  (0.02 mmol, 65.2 mg) and **9** (0.3 mmol, 107.8 mg) in DCM (2 mL) was stirred at room temperature for 6 h. Column chromatography on silica gel (eluent: hexane to hexane/ethyl acetate = 19:1) afforded **19** in 71% yield (29.6 mg) as a white solid.  $^1\text{H}$  NMR (300 MHz, Chloroform-*d*)  $\delta$  = 7.12 – 6.94 (m, 6H), 6.91 – 6.80 (m, 2H).  $^{13}\text{C}$  NMR (75 MHz, Chloroform-*d*)  $\delta$  = 143.5, 126.3, 124.3, 123.9, 117.0, 115.7, 107.2. IR (neat): 2227, 1594, 1488, 1321, 1293, 1273, 1204, 1152, 1137, 1095, 1039, 927, 867, 812, 746, 689, 634  $\text{cm}^{-1}$ ; HRMS calculated  $m/z$  for  $\text{C}_{13}\text{H}_8\text{N}_2\text{ONa}^+$   $[\text{M}+\text{Na}]^+$ : 231.0529, found (ESI) 231.0532.

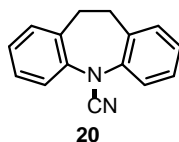

A mixture of 10,11-dihydro-5*H*-dibenzo[*b,f*]azepine **S10** (0.2 mmol, 39.1 mg),  $\text{Cs}_2\text{CO}_3$  (0.02 mmol, 65.2 mg) and **9** (0.3 mmol, 107.8 mg) in DCM (2 mL) was stirred at room temperature for 8 h. Column chromatography on silica gel (eluent: hexane to hexane/ethyl acetate = 9:1) afforded **20** in 94% yield (41.2 mg) as a colorless oil.  $^1\text{H}$  NMR (300 MHz, Chloroform-*d*)  $\delta$  = 7.56-7.53 (m, 2H), 7.30 – 7.10 (m, 6H), 3.16 (s, 4H).  $^{13}\text{C}$  NMR (75 MHz, Chloroform-*d*)  $\delta$  = 139.5, 134.1, 130.7, 127.5, 127.0, 122.4, 114.2, 31.5. IR (neat): 2908, 2202, 1578, 1488, 1448, 1427, 1332, 1286, 1251, 1219, 1177, 1135, 1110, 964, 941, 872, 854, 768, 751, 742, 708, 680, 640, 596, 563, 548, 515  $\text{cm}^{-1}$ ; HRMS calculated  $m/z$  for  $\text{C}_{15}\text{H}_{13}\text{N}_2^+$   $[\text{M}+\text{H}]^+$ : 221.1073, found (ESI) 221.1075.

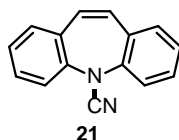

A mixture of 5*H*-dibenzo[*b,f*]azepine **S11** (0.2 mmol, 38.6 mg), Cs<sub>2</sub>CO<sub>3</sub> (0.02 mmol, 65.2 mg) and **9** (0.3 mmol, 107.8 mg) in DCM (2 mL) was stirred at room temperature for 6 h. Column chromatography on silica gel (eluent: hexane to hexane/ethyl acetate = 9:1) afforded **21** in 99% yield (43.2 mg) as a white solid. <sup>1</sup>H NMR (300 MHz, Chloroform-*d*) δ = 7.49-7.46 (m, 2H), 7.41 – 7.32 (m, 2H), 7.28 – 7.14 (m, 4H), 6.74 (s, 2H). <sup>13</sup>C NMR (75 MHz, Chloroform-*d*) δ = 140.8, 132.4, 131.1, 130.2, 130.1, 127.6, 122.9, 114.6. IR (neat): 3022, 2219, 1600, 1576, 1489, 1456, 1435, 1288, 1248, 1199, 1161, 1137, 1115, 941, 922, 803, 784, 754, 701, 681, 635, 556, 513 cm<sup>-1</sup>; HRMS calculated m/z for C<sub>15</sub>H<sub>11</sub>N<sub>2</sub><sup>+</sup> [M+H]<sup>+</sup>: 219.0917, found (ESI) 219.0918.

#### Procedure for the preparation of **22**

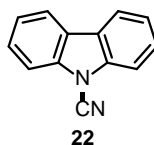

Compound **9** (107.8 mg, 0.3 mmol, 1.5 equiv) was added to a stirred solution of 9*H*-carbazole **S12** (33.4 mg, 0.2 mmol, 1.0 equiv) in DCE (2 mL) at room temperature. The resulting mixture was stirred at 50 °C for 14 h. and then the reaction was quenched with brine, extracted with DCM and the organic phase was dried over anhydrous Na<sub>2</sub>SO<sub>4</sub>. Evaporation of the solvent under the reduced pressure afforded a residue, which was purified by column chromatography on silica gel (eluent: hexane to hexane/ethyl acetate = 20:1) to afford **22** (26.0 mg, 68% yield) as a white solid. <sup>1</sup>H NMR (300 MHz, Chloroform-*d*) δ = 7.98-7.95 (m, 2H), 7.64-7.61 (m, 2H), 7.55-7.50 (m, 2H), 7.44-7.38 (m, 2H). <sup>13</sup>C NMR (75 MHz, Chloroform-*d*) δ = 138.1, 127.8, 124.4, 124.3, 121.0, 111.7, 107.0. IR (neat): 33061, 2236, 1904, 1603, 1490, 1476, 1444, 1341, 1304, 1260, 1217, 1152, 1110, 1023, 935, 910, 856, 798, 741, 716, 650, 611, 551, 527 cm<sup>-1</sup>; HRMS calculated m/z for C<sub>13</sub>H<sub>8</sub>N<sub>2</sub>Na<sup>+</sup> [M+Na]<sup>+</sup>: 215.0580, found (ESI) 215.0582.

### Procedure for the preparation of **23**

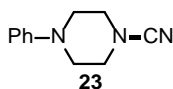

Compound **9** (107.8 mg, 0.3 mmol, 1.5 equiv) was added at -50 °C to a stirred solution of 1-phenylpiperazine **S13** (30.6  $\mu$ L, 0.2 mmol, 1.0 equiv) in DCM (2 mL). The resulting mixture was stirred at -50 °C for 6 h. Then, the reaction was quenched with brine, extracted with DCM, and the organic phase dried over anhydrous Na<sub>2</sub>SO<sub>4</sub>. Evaporation of the solvent under the reduced pressure afforded a residue, which was purified by column chromatography on silica gel (eluent: hexane to hexane/ethyl acetate = 4:1) to afford **23** (15.8 mg, 42% yield) as a colorless oil. <sup>1</sup>H NMR (300 MHz, Chloroform-*d*)  $\delta$  = 7.36 – 7.22 (m, 2H), 6.99 – 6.86 (m, 3H), 3.44 – 3.34 (m, 4H), 3.29 – 3.18 (m, 4H). <sup>13</sup>C NMR (75 MHz, Chloroform-*d*)  $\delta$  = 150.9, 129.5, 121.3, 117.6, 117.3, 49.2, 49.0. The spectroscopic data are in agreement with those previously reported.<sup>[23]</sup>

### Procedure for the preparation of **24**

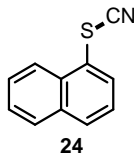

Compound **9** (107.8 mg, 0.3 mmol, 1.5 equiv) was added at -10 °C under nitrogen to a stirred solution of naphthalene-1-thiol **S14** (27.9  $\mu$ L, 0.2 mmol, 1.0 equiv) in DCM (2 mL). The resulting mixture was stirred at -10 °C for 0.5 h. and then the reaction was quenched with brine, extracted with DCM, and the organic phase dried over anhydrous Na<sub>2</sub>SO<sub>4</sub>. Evaporation of the solvent under reduced pressure afforded a residue, which was purified by column chromatography on silica gel (eluent: hexane to hexane/ethyl acetate = 20:1) to afford **24** (25.2 mg, 68% yield) as a colorless oil. <sup>1</sup>H NMR (300 MHz, Chloroform-*d*)  $\delta$  = 8.22 (d, *J* = 8.7 Hz, 1H), 7.99 – 7.86 (m, 3H), 7.71-7.65 (m, 1H), 7.62-7.57 (m, 1H), 7.51-7.46 (m, 1H). <sup>13</sup>C NMR (75 MHz, Chloroform-*d*)  $\delta$  = 134.5, 132.5, 132.3, 131.7, 129.1, 128.3, 127.3, 126.0, 124.3, 120.9, 110.8. The spectroscopic data are in agreement with those previously reported.<sup>[24]</sup>

### Procedure for the preparation of 25

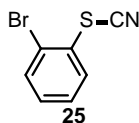

Compound **9** (107.8 mg, 0.3 mmol, 1.5 equiv) was added at -10 °C to a stirred solution of 2-bromobenzenethiol **S15** (23.5  $\mu$ L, 0.2 mmol, 1.0 equiv) in DCM (2 mL). The resulting mixture was stirred at -10 °C for 2.5 h. Then, the reaction was quenched with brine, extracted with DCM and the organic phase dried over anhydrous Na<sub>2</sub>SO<sub>4</sub>. Evaporation of the organic solvent under reduced pressure afforded a residue, which was purified by column chromatography on silica gel (eluent: hexane to hexane/ethyl acetate = 50:1) to afford **25** (26.1 mg, 61% yield) as a colorless oil. <sup>1</sup>H NMR (300 MHz, Chloroform-*d*)  $\delta$  = 7.73-7.70 (m, 1H), 7.63-7.60 (m, 1H), 7.47-7.41 (m, 1H), 7.31 – 7.21 (m, 1H). <sup>13</sup>C NMR (75 MHz, Chloroform-*d*)  $\delta$  = 133.7, 130.2, 129.6, 129.2, 127.3, 121.9, 109.7. The spectroscopic data is in agreement with that previously reported.<sup>[25]</sup>

### Procedure for the preparation of 26

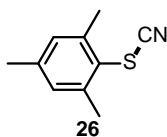

Compound **9** (107.8 mg, 0.3 mmol, 1.5 equiv) was added at -20 °C to a stirred solution of 2,4,6-trimethylbenzenethiol **S16** (29.7  $\mu$ L, 0.2 mmol, 1.0 equiv) in DCM (2 mL). The resulting mixture was stirred at -20 °C for 1 h. Then, the reaction was quenched with brine, extracted with DCM and the organic phase dried over anhydrous Na<sub>2</sub>SO<sub>4</sub>. Evaporation of the solvent under the reduced pressure afforded a residue, which was purified by column chromatography on silica gel (eluent: hexane to hexane/ethyl acetate = 50:1) to afford **26** (29.8 mg, 84% yield) as a colorless oil. <sup>1</sup>H NMR (300 MHz, Chloroform-*d*)  $\delta$  = 7.00 (s, 2H), 2.55 (s, 6H), 2.29 (s, 3H). <sup>13</sup>C NMR (75 MHz, Chloroform-*d*)  $\delta$  = 142.8, 141.6, 130.2, 119.2, 111.0, 22.0, 21.2. The spectroscopic data are in agreement with those previously reported.<sup>[26]</sup>

### Procedure for the preparation of 27

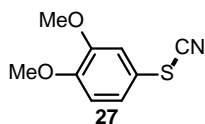

Compound **9** (107.8 mg, 0.3 mmol, 1.5 equiv) was added to a stirred solution of 3,4-dimethoxybenzenethiol **S17** (29.0  $\mu$ L, 0.2 mmol, 1.0 equiv) in DCM (2 mL) at -20 °C under nitrogen. The resulting mixture was stirred at -20 °C for 0.5 h. Then, the reaction was quenched with brine, extracted with DCM and the organic phase dried over anhydrous  $\text{Na}_2\text{SO}_4$ . Evaporation of the solvent under reduced pressure afforded a residue, which was purified by column chromatography on silica gel (eluent: hexane to hexane/ethyl acetate = 4:1) to afford **27** (23.8 mg, 61% yield) as a colorless oil.  $^1\text{H}$  NMR (300 MHz, Chloroform-*d*)  $\delta$  = 7.15 (dd,  $J$  = 8.4, 2.1 Hz, 1H), 7.05 (d,  $J$  = 2.1 Hz, 1H), 6.89 (d,  $J$  = 8.4 Hz, 1H), 3.91 (s, 3H), 3.90 (s, 3H).  $^{13}\text{C}$  NMR (75 MHz, Chloroform-*d*)  $\delta$  = 151.0, 150.2, 125.4, 114.6, 114.0, 112.3, 111.6, 56.3, 56.2. The spectroscopic data are in agreement with those previously reported.<sup>[24]</sup>

#### Procedure for the preparation of **28**

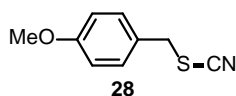

Compound **9** (107.8 mg, 0.3 mmol, 1.5 equiv) was added to a stirred suspension of (4-methoxyphenyl)methanethiol **S18** (27.5  $\mu$ L, 0.2 mmol, 1.0 equiv) and  $\text{Cs}_2\text{CO}_3$  (65.2 mg, 0.2 mmol, 1.0 equiv) in DCM (2 mL) at -50 °C. The resulting mixture was stirred at -50 °C for 5 h. Then, the reaction was quenched with brine, extracted with DCM and the organic phase dried over anhydrous  $\text{Na}_2\text{SO}_4$ . Evaporation of the solvent under reduced pressure afforded a residue, which was purified by column chromatography on silica gel (eluent: hexane to hexane/ethyl acetate = 10:1) to afford **28** (25.3 mg, 71% yield) as a colorless oil.  $^1\text{H}$  NMR (300 MHz, Chloroform-*d*)  $\delta$  = 7.28 (d,  $J$  = 8.7 Hz, 2H), 6.90 (d,  $J$  = 8.7 Hz, 2H), 4.14 (s, 2H), 3.81 (s, 3H).  $^{13}\text{C}$  NMR (75 MHz, Chloroform-*d*)  $\delta$  = 160.1, 130.5, 126.3, 114.6, 112.3, 55.4, 38.4. The spectroscopic data are in agreement with those previously reported.<sup>[24]</sup>

#### Procedure for the preparation of **29**

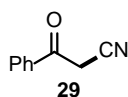

Compound **9** (71.9 mg, 0.2 mmol, 1.0 equiv) was added to a stirred solution of trimethyl((1-phenylvinyl)oxy)silane **S19** (61.5  $\mu$ L, 0.3 mmol, 1.5 equiv) in DCM (2 mL) at room temperature. The resulting mixture was stirred at room temperature for 15 minutes. Then, the reaction was quenched with brine, extracted with DCM and the organic phase dried over anhydrous  $\text{Na}_2\text{SO}_4$ . Evaporation of the solvent under reduced pressure afforded a residue, which was purified by column chromatography on silica gel (eluent: hexane to hexane/ethyl acetate = 5:1) to afford **29** (27.4 mg, 94% yield) as a light yellow solid.  $^1\text{H}$  NMR (300 MHz, Chloroform-*d*)  $\delta$  = 7.98 – 7.87 (m, 2H), 7.73 – 7.60 (m, 1H), 7.59 – 7.46 (m, 2H), 4.12 (s, 2H).  $^{13}\text{C}$  NMR (75 MHz, Chloroform-*d*)  $\delta$  187.3, 134.8, 134.3, 129.2, 128.5, 114.0, 29.5. The spectroscopic data are in agreement with those previously reported.<sup>[27]</sup>

### Procedure for the preparation of **30**

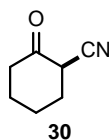

Compound **9** (71.9 mg, 0.2 mmol, 1.0 equiv) was added to a stirred solution of (cyclohex-1-en-1-yloxy)trimethylsilane **20** (58.4  $\mu$ L, 0.3 mmol, 1.5 equiv) in DCM (2 mL) at room temperature. The resulting mixture was stirred for 10 minutes. Then, the reaction was quenched with brine, extracted with DCM, and the organic phase dried over anhydrous  $\text{Na}_2\text{SO}_4$ . Because **30** is volatile on high vacuum line, the solvent was evaporated under the reduced pressure and then a  $^1\text{H}$  NMR analysis of the obtained mixture using  $\text{CH}_2\text{Br}_2$  as internal standard was conducted, which indicated that the desired product **30** had been obtained in 92% NMR yield.

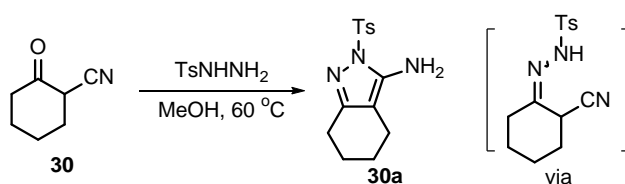

To a stirred solution of the above recovered NMR sample in MeOH (3 mL), 4-methylbenzenesulfonylhydrazide (55.9 mg, 0.3 mmol, 1.5 equiv.) was added and the



resulting solution stirred at 60 °C for 18 h. Then, the reaction was quenched with brine, extracted with DCM and the organic phase dried over anhydrous Na<sub>2</sub>SO<sub>4</sub>. Evaporation of the solvent under reduced pressure afforded a residue, which was purified by column chromatography on silica gel (eluent: hexane/ethyl acetate = 1:1) to afford a white solid (26.0 mg, 0.0892 mmol, 45% overall yield). <sup>1</sup>H NMR (300 MHz, Chloroform-*d*) δ = 7.95 – 7.76 (m, 2H), 7.34 – 7.27 (m, 2H), 4.66 (bs, 2H), 2.58 – 2.45 (m, 2H), 2.41 (s, 3H), 2.27 – 2.12 (m, 2H), 1.70-1.65 (m, 4H). <sup>13</sup>C NMR (75 MHz, Chloroform-*d*) δ = 156.4, 145.1, 144.7, 135.2, 129.9, 127.8, 99.2, 24.1, 22.8, 22.7, 21.8, 19.3. IR (neat): 3457, 3296, 2935, 2857, 1625, 1596, 1476, 1425, 1357, 1309, 1259, 1223, 1188, 1173, 1143, 1130, 1085, 1045, 956, 931, 856, 812, 730, 701, 687, 665, 614, 590, 542 cm<sup>-1</sup>; HRMS calculated m/z for C<sub>14</sub>H<sub>18</sub>N<sub>3</sub>O<sub>2</sub>S<sup>+</sup> [M+H]<sup>+</sup>: 292.1114, found (ESI) 292.1116.

### Procedure for the preparation of 31

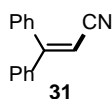

Compound **9** (107.8 mg, 0.3 mmol, 1.5 equiv) dissolved in CH<sub>3</sub>CN (0.7 mL) was added to a stirred solution of ethene-1,1-diphenylethylene **S21** (36.1 mg, 0.2 mmol, 1.0 equiv) in DCE (1.4 mL) at room temperature. The resulting mixture was stirred at room temperature for 21 h. Then, the reaction was quenched with brine, extracted with DCM and the organic phase dried over anhydrous Na<sub>2</sub>SO<sub>4</sub>. Evaporation of the solvent under the reduced pressure afforded a residue, which was purified by column chromatography on silica gel (eluent: hexane to hexane/ethyl acetate = 20:1) to afford **31** (30.5 mg, 74% yield) as a colorless oil. <sup>1</sup>H NMR (300 MHz, Chloroform-*d*) δ = 7.48 – 7.33 (m, 8H), 7.32 – 7.26 (m, 2H), 5.73 (s, 1H). <sup>13</sup>C NMR (75 MHz, Chloroform-*d*) δ = 163.2, 139.0, 137.2, 130.5, 130.1, 129.7, 128.8, 128.6, 128.6, 118.0, 95.0. The spectroscopic data is in agreement with that previously reported.<sup>[28]</sup>

### Procedure for the preparation of 32

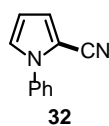

Compound **9** (107.8 mg, 0.3 mmol, 1.5 equiv) was added to a stirred suspension of 1-phenyl-1*H*-pyrrole **S22** (28.6 mg, 0.2 mmol, 1.0 equiv) and Cs<sub>2</sub>CO<sub>3</sub> (65.2 mg, 0.2 mmol, 1.0 equiv) in DCM (2 mL) at 0 °C. The resulting mixture was stirred at that temperature for 12 h. Then, the reaction was quenched with brine, extracted with DCM and the organic phase dried over anhydrous Na<sub>2</sub>SO<sub>4</sub>. Evaporation of the solvent under the reduced pressure afforded a residue, which was purified by column chromatography on silica gel (eluent: hexane to hexane/ethyl acetate = 10:1) to afford **32** (33.5 mg, 99% yield) as a colorless liquid. <sup>1</sup>H NMR (300 MHz, Chloroform-*d*) δ = 7.49 – 7.27 (m, 5H), 7.00 (dd, *J* = 2.8, 1.6 Hz, 1H), 6.91 (dd, *J* = 4.0, 1.6 Hz, 1H), 6.27 (dd, *J* = 4.0, 2.8 Hz, 1H). <sup>13</sup>C NMR (75 MHz, Chloroform-*d*) δ = 138.3, 129.8, 128.4, 127.1, 124.3, 122.3, 113.9, 110.7, 104.1. The spectroscopic data are in agreement with those previously reported.<sup>[29]</sup>

### Procedure for the preparation of **33**

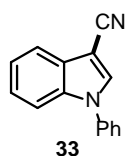

Compound **9** (143.7 mg, 0.4 mmol, 2.0 equiv) was added to a stirred suspension of 1-phenyl-1*H*-indole **S23** (38.7 mg, 0.2 mmol, 1.0 equiv) and K<sub>3</sub>PO<sub>4</sub> (63.7 mg, 0.3 mmol, 1.5 equiv) in DCM (2 mL) at 15 °C under nitrogen and the resulting mixture was stirred at that temperature for 20 h. Then, the reaction was quenched with brine, extracted with DCM and the organic phase dried over anhydrous Na<sub>2</sub>SO<sub>4</sub>. Evaporation of the solvent under the reduced pressure afforded a residue, which was purified by column chromatography on silica gel (eluent: hexane to hexane/ethyl acetate = 10:1) to afford **33** (30.4 mg, 70% yield) as a light yellow solid. <sup>1</sup>H NMR (300 MHz, Chloroform-*d*) δ = 7.86 – 7.80 (m, 1H), 7.78 (s, 1H), 7.62 – 7.53 (m, 2H), 7.53 – 7.42 (m, 4H), 7.37 – 7.29 (m, 2H). <sup>13</sup>C NMR (75 MHz, Chloroform-*d*) δ = 137.9, 135.7, 134.7, 130.1, 128.5, 128.0, 125.0, 124.6, 122.9, 120.1, 115.6, 111.6, 88.2. The spectroscopic data are in agreement with those previously reported.<sup>[30]</sup>

### Procedure for the preparation of **34**

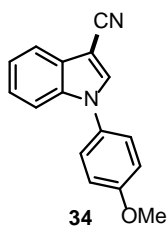

Compound **9** (143.7 mg, 0.4 mmol, 2.0 equiv) was added to a stirred suspension of 1-(4-methoxyphenyl)-1*H*-indole **S24** (44.7 mg, 0.2 mmol, 1.0 equiv) and K<sub>3</sub>PO<sub>4</sub> (42.5 mg, 0.2 mmol, 1.0 equiv) in DCM (2 mL) at 10 °C under nitrogen. The resulting mixture was stirred at that temperature for 5 h. Then, the reaction was quenched with brine, extracted with DCM, and the organic phase dried over anhydrous Na<sub>2</sub>SO<sub>4</sub>. Evaporation of the solvent under the reduced pressure afforded a residue, which was purified by column chromatography on silica gel (eluent: hexane to hexane/ethyl acetate = 10:1) to afford **34** (39.3 mg, 79% yield) as a white solid. <sup>1</sup>H NMR (300 MHz, Chloroform-*d*) δ = 7.85 – 7.76 (m, 1H), 7.72 (s, 1H), 7.47 – 7.26 (m, 5H), 7.11 – 6.99 (m, 2H), 3.89 (s, 3H). <sup>13</sup>C NMR (75 MHz, Chloroform-*d*) δ = 159.2, 136.1, 135.1, 130.7, 127.8, 126.5, 124.5, 122.7, 120.0, 115.8, 115.2, 111.6, 87.5, 55.8. The spectroscopic data are in agreement with those previously reported.<sup>[31]</sup>

### Procedure for the preparation of **35**

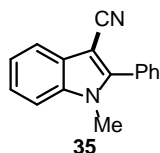

Compound **9** (71.9 mg, 0.2 mmol, 1.0 equiv) was added to a stirred solution of 1-methyl-2-phenyl-1*H*-indole **S25** (62.2 mg, 0.3 mmol, 1.5 equiv) in DCM (2 mL) at room temperature and the resulting mixture was stirred at that temperature for 5 minutes. Then, the reaction was quenched with brine, extracted with DCM and the organic phase dried over anhydrous Na<sub>2</sub>SO<sub>4</sub>. Evaporation of the solvent under the reduced pressure afforded a residue, which was purified by column chromatography on silica gel (eluent: hexane to hexane/ethyl acetate = 10:1) to afford **35** (24.6 mg, 53% yield) as a colorless oil. <sup>1</sup>H NMR (300 MHz, Chloroform-*d*) δ = 7.82 – 7.73 (m, 1H), 7.62 – 7.47 (m, 5H), 7.45 – 7.27 (m, 3H), 3.74 (s, 3H). <sup>13</sup>C NMR (75 MHz, Chloroform-*d*) δ = 148.2, 137.0, 130.0, 129.9, 129.1, 128.8, 127.7, 124.0,

122.5, 119.6, 116.7, 110.6, 85.6, 31.8. The spectroscopic data are in agreement with those previously reported.<sup>[23]</sup>

### Procedure for the preparation of **36**

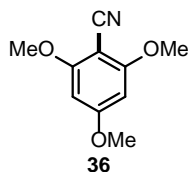

Compound **9** (107.8 mg, 0.3 mmol, 1.5 equiv) was added to a stirred suspension of 1,3,5-trimethoxybenzene **S26** (33.6 mg, 0.2 mmol, 1.0 equiv) and Cs<sub>2</sub>CO<sub>3</sub> (65.2 mg, 0.2 mmol, 1.0 equiv) in DCM (2 mL) at room temperature. The resulting mixture was stirred at room temperature for 4 h and then, quenched with brine, extracted with DCM, and the organic phase dried over anhydrous Na<sub>2</sub>SO<sub>4</sub>. Evaporation of the solvent under the reduced pressure afforded a residue, which was purified by column chromatography on silica gel (eluent: hexane to hexane/ethyl acetate = 4:1) to afford **36** (30.8 mg, 80% yield) as a white solid. <sup>1</sup>H NMR (300 MHz, Chloroform-*d*) δ = 6.04 (s, 2H), 3.85 (s, 6H), 3.84 (s, 3H). <sup>13</sup>C NMR (75 MHz, Chloroform-*d*) δ = 165.4, 163.8, 114.7, 90.4, 84.0, 56.2, 55.8. The spectroscopic data is in agreement with that previously reported.<sup>[32]</sup>

### Procedure for the preparation of **37**

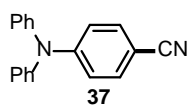

Salt **9** (143.7 mg, 0.4 mmol, 2.0 equiv) was added to a stirred solution of triphenylamine **S27** (49.1 mg, 0.2 mmol, 1.0 equiv) in DCE (2 mL) at room temperature under nitrogen and the resulting mixture stirred at 50 °C for 14 h. Then, the reaction was quenched with brine, extracted with DCM and the organic phase dried over anhydrous Na<sub>2</sub>SO<sub>4</sub>. The solvent was evaporated under reduced pressure and the residue obtained purified by column chromatography on silica gel (eluent: hexane to hexane/ethyl acetate = 20:1) to afford **37** (17.8 mg, 33% yield) as a light yellow solid. <sup>1</sup>H NMR (300 MHz, Chloroform-*d*) δ = 7.45 – 7.38 (m, 2H), 7.37 – 7.28 (m, 4H), 7.21 – 7.08 (m, 6H), 7.00 – 6.90 (m, 2H). <sup>13</sup>C NMR (75 MHz,

Chloroform-*d*)  $\delta = 151.7, 146.1, 133.3, 129.9, 126.3, 125.3, 119.8, 102.6$ . The spectroscopic data are in agreement with those previously reported.<sup>[33]</sup>

### Procedure for the preparation of **38**

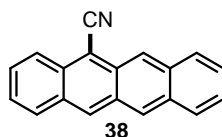

Salt **9** (71.9 mg, 0.2 mmol, 1.0 equiv) was added to a stirred solution of tetracene **S28** (45.7 mg, 0.2 mmol, 1.0 equiv) in DCE (2 mL) at room temperature. The resulting mixture was stirred at 50 °C for 7 h. After this another portion of **9** (71.9 mg, 0.2 mmol, 1.0 equiv) was added and the stirring continued for additional 11 h at the same temperature. Subsequently, the reaction was quenched with water, extracted with DCM and the organic phase dried over anhydrous Na<sub>2</sub>SO<sub>4</sub>. Evaporation of the solvent under the reduced pressure afforded a residue, which was purified by column chromatography on silica gel (eluent: hexane to hexane/ethyl acetate = 40:1) to afford **38** (13.8 mg, 27% yield) as a red solid. <sup>1</sup>H NMR (400 MHz, Chloroform-*d*)  $\delta = 8.95$  (s, 1H), 8.83 (s, 1H), 8.66 (s, 1H), 8.35 (d,  $J = 8.8$  Hz, 1H), 8.08 – 7.96 (m, 3H), 7.67 – 7.59 (m, 1H), 7.53 – 7.45 (m, 3H). <sup>13</sup>C NMR (101 MHz, Chloroform-*d*)  $\delta = 134.5, 133.5, 133.4, 132.0, 130.3, 130.3, 129.3, 128.9, 128.5, 128.3, 128.0, 127.2, 126.4, 126.0, 125.4, 123.9, 117.9, 104.9$ . IR (neat): 2918, 2849, 2220, 1674, 1483, 1457, 1259, 1098, 1019, 890, 801, 747, 697, 644, 626, 609, 577, 532 cm<sup>-1</sup>; HRMS calculated  $m/z$  for C<sub>19</sub>H<sub>11</sub>N<sup>+</sup> [M]<sup>+</sup>: 253.0886, found (ESI) 253.0885.

### Procedure for the preparation of **40** and **41**

Salt **9** (107.8 mg, 0.3 mmol, 1.5 equiv) was added to a stirred suspension of 3-methyl-1*H*-indole **39** (26.2 mg, 0.2 mmol, 1.0 equiv) and Cs<sub>2</sub>CO<sub>3</sub> (65.2 mg, 0.2 mmol, 1.0 equiv) in DCM (2 mL) at 0 °C under nitrogen. The resulting mixture was stirred at that temperature for 2 h. Then, the reaction was quenched with brine, extracted with DCM and the organic phase dried over anhydrous Na<sub>2</sub>SO<sub>4</sub>. Evaporation of the solvent under reduced pressure afforded a residue, which was purified by column chromatography on silica gel (eluent: hexane to hexane/ethyl acetate = 3:1) to afford **40** (14.4 mg, 50% yield) and **41** (9.3

mg, 30% yield), both as a white solids.

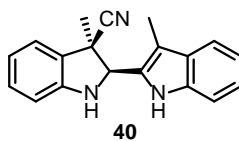

$^1\text{H}$  NMR (300 MHz, Dichloromethane- $d_2$ )  $\delta$  = 8.69 (bs, 1H), 7.63-7.60 (m, 1H), 7.40 – 7.32 (m, 1H), 7.32 – 7.09 (m, 4H), 7.00 – 6.91 (m, 1H), 6.89 – 6.79 (m, 1H), 5.06 – 4.92 (m, 1H), 4.31 (bs, 1H), 2.40 (s, 3H), 1.84 (s, 3H).  $^{13}\text{C}$  NMR (75 MHz, Dichloromethane- $d_2$ )  $\delta$  = 150.0, 135.9, 130.6, 129.7, 129.4, 128.6, 124.1, 123.1, 121.5, 121.2, 119.8, 119.2, 111.5, 111.4, 111.0, 67.3, 47.5, 22.8, 9.3. IR (neat): 3441, 3334, 2922, 2226, 1607, 1479, 1463, 1385, 1336, 1314, 1304, 1252, 1214, 1154, 1131, 1036, 1012, 945, 876, 854, 819, 782, 758, 707, 694, 635, 607, 578, 566, 555, 528  $\text{cm}^{-1}$ ; HRMS calculated  $m/z$  for  $\text{C}_{19}\text{H}_{18}\text{N}_3^+$   $[\text{M}+\text{H}]^+$ : 288.1495, found (ESI) 288.1496.

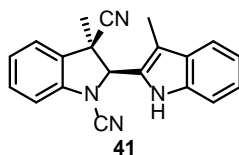

$^1\text{H}$  NMR (400 MHz, Chloroform- $d$ )  $\delta$  = 8.33 (bs, 1H), 7.65 – 7.58 (m, 1H), 7.50-7.46 (m, 1H), 7.43 – 7.33 (m, 2H), 7.31 – 7.22 (m, 2H), 7.21 – 7.12 (m, 2H), 5.35 (s, 1H), 2.43 (s, 3H), 1.88 (s, 3H).  $^{13}\text{C}$  NMR (101 MHz, Chloroform- $d$ )  $\delta$  = 141.3, 136.7, 131.4, 128.3, 127.3, 125.5, 124.3, 124.2, 122.7, 120.1, 119.5, 119.4, 115.4, 112.0, 111.8, 110.2, 69.6, 46.0, 23.4, 9.1. IR (neat): 3304, 2919, 2222, 1597, 1481, 1464, 1336, 1316, 1241, 1172, 1099, 987, 934, 795, 745, 651, 597, 566  $\text{cm}^{-1}$ ; HRMS calculated  $m/z$  for  $\text{C}_{20}\text{H}_{17}\text{N}_4^+$   $[\text{M}+\text{H}]^+$ : 313.1448, found (ESI) 313.1447.

### Procedure for the preparation of 43

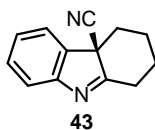

Salt **9** (107.8 mg, 0.3 mmol, 1.5 equiv) was added to a stirred solution of 2,3,4,9-tetrahydro-1*H*-carbazole **42** (34.2 mg, 0.2 mmol, 1.0 equiv) in CH<sub>3</sub>CN (2 mL) at room temperature and the resulting mixture stirred for 10 minutes. Then, the reaction was quenched with water, extracted with DCM, and the organic phase dried over anhydrous Na<sub>2</sub>SO<sub>4</sub>. Evaporation of the solvent under the reduced pressure afforded a residue, which was purified by column chromatography on silica gel (eluent: hexane to hexane/ethyl acetate = 4:1) to afford **43** (30.0 mg, 76% yield) as a white solid. <sup>1</sup>H NMR (400 MHz, Chloroform-*d*) δ = 7.65-7.63 (m, 1H), 7.57-7.54 (m, 1H), 7.47-7.43 (m, 1H), 7.33-7.29 (m, 1H), 3.08 – 2.96 (m, 1H), 2.93 – 2.75 (m, 2H), 2.36 – 2.23 (m, 1H), 2.12 – 1.97 (m, 1H), 1.98 – 1.86 (m, 1H), 1.60 – 1.43 (m, 1H), 1.32 – 1.17 (m, 1H). <sup>13</sup>C NMR (101 MHz, Chloroform-*d*) δ = 178.6, 155.1, 137.2, 130.0, 126.6, 122.7, 121.3, 117.6, 51.9, 39.2, 30.2, 28.4, 22.4. IR (neat): 2941, 2854, 2236, 1731, 1618, 1592, 1440, 1347, 1273, 1231, 1187, 1139, 1093, 1043, 1012, 956, 934, 906, 867, 854, 772, 757, 689, 672, 635, 608, 563, 525 cm<sup>-1</sup>; HRMS calculated m/z for C<sub>13</sub>H<sub>13</sub>N<sub>2</sub><sup>+</sup> [M+H]<sup>+</sup>: 197.1073, found (ESI) 197.1074.

#### Procedure for the preparation of **45**

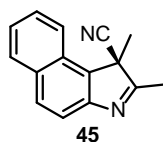

Salt **9** (107.8 mg, 0.3 mmol, 1.5 equiv) was added to a stirred solution of 1,2-dimethyl-3*H*-benzo[*e*]indole **44** (39.1 mg, 0.2 mmol, 1.0 equiv) in CH<sub>3</sub>CN (2 mL) at room temperature and the resulting mixture stirred for 10 minutes. Then, the reaction was quenched with water, extracted with DCM and the organic phase dried over anhydrous Na<sub>2</sub>SO<sub>4</sub>. Evaporation of the solvent under the reduced pressure afforded a residue, which was purified by column chromatography on silica gel (eluent: hexane to hexane/ethyl acetate = 4:1) to afford **45** (38.1 mg, 86% yield) as a light yellow oil. <sup>1</sup>H NMR (400 MHz, Chloroform-*d*) δ = 8.06-8.04 (m, 1H), 7.99 – 7.90 (m, 2H), 7.76 (d, *J* = 8.4 Hz, 1H), 7.66-7.62 (m, 1H), 7.54-7.50 (m, 1H), 2.60 (s, 3H), 1.85 (s, 3H). <sup>13</sup>C NMR (101 MHz, Chloroform-*d*) δ = 178.3, 152.1, 132.7, 131.3, 131.3, 129.7, 128.0, 127.9, 125.8, 122.3, 119.9, 117.9, 50.2, 22.5, 16.1. IR (neat): 3054, 2236, 1626, 1602, 1574, 1520, 1443, 1380, 1261, 1228, 1215, 1201, 1103, 1078, 1022, 968,

908, 866, 771, 755, 691, 662, 598, 589, 569, 553, 525  $\text{cm}^{-1}$ ; HRMS calculated  $m/z$  for  $\text{C}_{15}\text{H}_{13}\text{N}_2^+$   $[\text{M}+\text{H}]^+$ : 221.1073, found (ESI) 221.1072.

## 5. Metal-free cyano-cyclization of indole derivatives

### General procedure of the cyano-cyclisation of indole derivatives: preparation of 46-62.

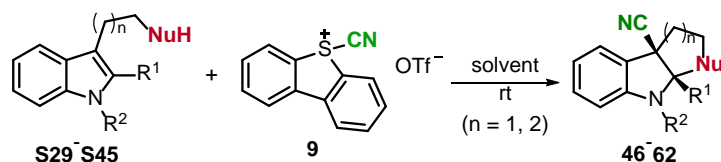

Compound **9** was added to a stirred solution of indole derivatives **S29-S45** (0.2 mmol, 1.0 equiv) in the appropriate solvent (2 mL) at room temperature under nitrogen flow and the resulting mixture was stirred at room temperature for the specified time (vide infra). Then, the reaction was quenched with water, extracted with DCM and the organic phase dried over anhydrous  $\text{Na}_2\text{SO}_4$ . Evaporation of the solvent under reduced pressure afforded a residue, which was purified by column chromatography on silica gel to afford the desired products.

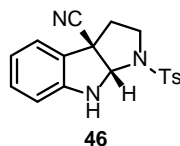

A mixture of **S29** (0.2 mmol, 62.9 mg, 1.0 equiv) and **9** (0.3 mmol, 107.8 mg, 1.5 equiv) in  $\text{CH}_3\text{CN}$  (2 mL) was stirred at room temperature for 10 minutes. Column chromatography on silica gel (eluent: hexane to hexane/ethyl acetate = 4:1) afforded **46** in 69% yield (46.5 mg) as a colorless oil.  $^1\text{H}$  NMR (400 MHz, Chloroform- $d$ )  $\delta$  = 7.83 – 7.70 (m, 2H), 7.36 (d,  $J$  = 8.0 Hz, 2H), 7.20-7.16 (m, 2H), 6.83 (t,  $J$  = 7.6 Hz, 1H), 6.67 (d,  $J$  = 7.6 Hz, 1H), 5.73 (s, 1H), 5.02 (bs, 1H), 3.58 – 3.44 (m, 1H), 3.30 – 3.13 (m, 1H), 2.54 – 2.24 (m, 5H).  $^{13}\text{C}$  NMR (101 MHz, Chloroform- $d$ )  $\delta$  = 148.5, 144.6, 135.1, 130.9, 130.3, 127.3, 123.79, 123.5, 120.4, 119.5, 110.5, 82.6, 49.7, 46.8, 37.4, 21.7. IR (neat): 3370, 2917, 2238, 1608, 1486, 1337, 1311, 1266, 1201, 1164, 1091, 1060, 1009, 931, 895, 848, 820, 707, 661, 592, 570, 543  $\text{cm}^{-1}$ ; HRMS calculated  $m/z$  for  $\text{C}_{18}\text{H}_{18}\text{N}_3\text{O}_2\text{S}^+$   $[\text{M}+\text{H}]^+$ : 340.1114, found (ESI) 340.1117.



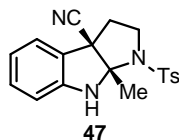

A mixture of **S30** (0.2 mmol, 65.7 mg, 1.0 equiv) and **9** (0.3 mmol, 107.8 mg, 1.5 equiv) in CH<sub>3</sub>CN (2 mL) was stirred at room temperature for 15 minutes. Column chromatography on silica gel (eluent: hexane to hexane/ethyl acetate = 4:1) afforded **47** in 85% yield (59.9 mg) as a white solid. <sup>1</sup>H NMR (400 MHz, Chloroform-*d*) δ = 7.63 (d, *J* = 8.0 Hz, 2H), 7.23 (d, *J* = 8.0 Hz, 2H), 7.20 – 7.08 (m, 2H), 6.79 (t, *J* = 7.6 Hz, 1H), 6.56 (d, *J* = 8.0 Hz, 1H), 5.36 (bs, 1H), 3.55 – 3.41 (m, 1H), 3.14 – 2.98 (m, 1H), 2.59 – 2.49 (m, 2H), 2.38 (s, 3H), 2.04 (s, 3H). <sup>13</sup>C NMR (101 MHz, Chloroform-*d*) δ = 148.1, 143.8, 136.5, 130.7, 129.8, 127.2, 123.7, 123.7, 120.3, 118.6, 110.3, 90.6, 55.2, 47.0, 34.0, 25.1, 21.6. IR (neat): 3361, 2889, 2236, 1610, 1485, 1470, 1403, 1378, 1328, 1311, 1247, 1210, 1165, 1023, 1011, 959, 893, 816, 764, 706, 695, 617, 518 cm<sup>-1</sup>; HRMS calculated m/z for C<sub>19</sub>H<sub>20</sub>N<sub>3</sub>O<sub>2</sub>S<sup>+</sup> [M+H]<sup>+</sup>: 354.1271, found (ESI) 354.1274.

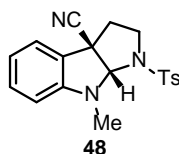

A mixture of **S31** (0.2 mmol, 65.7 mg, 1.0 equiv) and **9** (0.3 mmol, 107.8 mg, 1.5 equiv) in CH<sub>3</sub>CN (2 mL) was stirred at room temperature for 15 minutes. Column chromatography on silica gel (eluent: hexane to hexane/ethyl acetate = 4:1) afforded **48** in 61% yield (42.9 mg) as a white solid. <sup>1</sup>H NMR (300 MHz, Chloroform-*d*) δ = 7.87 – 7.74 (m, 2H), 7.44 – 7.35 (m, 2H), 7.23-7.18 (m, 1H), 7.16 – 7.06 (m, 1H), 6.75-6.69 (m, 1H), 6.45 (d, *J* = 7.8 Hz, 1H), 5.85 (s, 1H), 3.72-3.64 (m, 1H), 3.16-3.06 (m, 1H), 3.01 (s, 3H), 2.47 (s, 3H), 2.22-2.15 (m, 1H), 1.90-1.79 (m, 1H). <sup>13</sup>C NMR (75 MHz, Chloroform-*d*) δ = 149.9, 144.8, 135.50, 131.0, 130.5, 127.4, 123.7, 123.5, 119.8, 118.7, 106.9, 88.7, 48.7, 47.4, 39.1, 31.1, 21.7. IR (neat): 2890, 2233, 1603, 1497, 1445, 1430, 1349, 1318, 1306, 1254, 1211, 1159, 1105, 1089, 1021, 969, 919, 876, 841, 815, 802, 751, 724, 660, 603, 574, 532 cm<sup>-1</sup>; HRMS calculated m/z for C<sub>19</sub>H<sub>20</sub>N<sub>3</sub>O<sub>2</sub>S<sup>+</sup> [M+H]<sup>+</sup>: 354.1271, found (ESI) 354.1278.

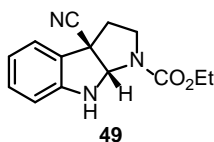

A mixture of **S32** (0.2 mmol, 46.5 mg, 1.0 equiv) and **9** (0.3 mmol, 107.8 mg, 1.5 equiv) in CH<sub>3</sub>CN (2 mL) was stirred at room temperature for 2 h. Column chromatography on silica gel (eluent: hexane to hexane/ethyl acetate = 4:1) afforded **49** in 68% yield (35.0 mg) as a colorless oil. <sup>1</sup>H NMR (400 MHz, DMSO-*d*<sub>6</sub>, 100 °C) δ = 7.34-7.31 (m, 1H), 7.17-7.13 (m, 1H), 6.78-6.74 (m, 1H), 6.70-6.68 (m, 1H), 6.54 (bs, 1H), 5.764-5.758 (m, 1H), 4.17-4.10 (m, 2H), 3.78-3.73 (m, 1H), 3.06-3.30 (m, 1H), 2.94 (s, 2H), 2.70-2.62 (m, 1H), 2.56 – 2.51 (m, 1H), 1.26 (t, *J* = 7.2 Hz, 3H). <sup>13</sup>C NMR (101 MHz, DMSO-*d*<sub>6</sub>, 100 °C) δ = 153.1, 149.1, 129.6, 123.7, 123.1, 119.8, 118.3, 109.3, 79.5, 60.4, 48.3, 44.1, 35.4, 13.8. IR (neat): 3276, 2981, 2240, 1692, 1607, 1471, 1416, 1380, 1346, 1319, 1258, 1237, 1201, 1172, 1111, 1026, 1008, 894, 820, 747, 609, 527 cm<sup>-1</sup>; HRMS calculated *m/z* for C<sub>14</sub>H<sub>16</sub>N<sub>3</sub>O<sub>2</sub><sup>+</sup> [M+H]<sup>+</sup>: 258.1237, found (ESI) 258.1237.

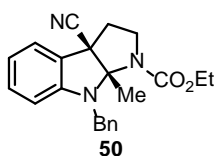

A mixture of **S33** (0.2 mmol, 67.3 mg, 1.0 equiv) and **9** (0.3 mmol, 107.8 mg, 1.5 equiv) in CH<sub>3</sub>CN (2 mL) was stirred at room temperature for 10 minutes. Column chromatography on silica gel (eluent: hexane to hexane/ethyl acetate = 4:1) afforded **50** in 89% yield (64.5 mg) as a white solid. <sup>1</sup>H NMR (400 MHz, DMSO-*d*<sub>6</sub>, 100 °C) δ = 7.38-7.36 (m, 1H), 7.34 – 7.25 (m, 2H), 7.27 – 7.17 (m, 3H), 7.11-7.06 (m, 1H), 6.77-6.73 (m, 1H), 6.26 (d, *J* = 8.0 Hz, 1H), 4.97 – 4.61 (m, 2H), 4.08-3.96 (m, 2H), 3.79-3.74 (m, 1H), 3.27 – 3.09 (m, 1H), 2.69 – 2.58 (m, 2H), 2.00 (s, 3H), 1.17 (t, *J* = 7.2 Hz, 3H). <sup>13</sup>C NMR (101 MHz, DMSO-*d*<sub>6</sub>, 100 °C) δ = 153.1, 147.8, 138.5, 129.7, 127.8, 126.0, 125.6, 123.4, 122.8, 118.6, 117.8, 107.2, 89.7, 60.2, 54.8, 46.5, 45.8, 32.2, 19.3, 13.7. IR (neat): 3417, 2982, 2241, 1702, 1681, 1605, 1488, 1465, 1449, 1401, 1376, 1347, 1313, 1232, 1212, 1186, 1157, 1118, 1103, 1073, 1055, 1027, 1007, 919, 880, 838, 771, 751, 739, 726, 694, 653, 637, 608, 555, 545, 530 cm<sup>-1</sup>; HRMS calculated *m/z* for C<sub>22</sub>H<sub>24</sub>N<sub>3</sub>O<sub>2</sub><sup>+</sup> [M+H]<sup>+</sup>: 362.1863, found (ESI) 362.1867.

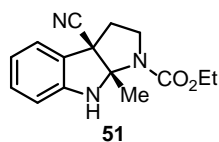

A mixture of **S34** (0.2 mmol, 49.3 mg, 1.0 equiv) and **9** (0.3 mmol, 107.8 mg, 1.5 equiv) in CH<sub>3</sub>CN (2 mL) was stirred at room temperature for 10 minutes. Column chromatography on silica gel (eluent: hexane to hexane/ethyl acetate = 4:1) afforded **51** in 71% yield (38.5 mg) as a colorless oil. <sup>1</sup>H NMR (400 MHz, DMSO-*d*<sub>6</sub>, 100 °C) δ = 7.36-7.33 (m, 1H), 7.17-7.12 (m, 1H), 6.79-6.75 (m, 1H), 6.73-6.71 (m, 1H), 6.50 (bs, 1H), 4.10 (q, *J* = 7.2 Hz, 2H), 3.64-3.59 (m, 1H), 3.08-3.01 (m, 1H), 2.70 – 2.55 (m, 2H), 1.86 (s, 3H), 1.22 (t, *J* = 7.2 Hz, 3H). <sup>13</sup>C NMR (101 MHz, DMSO-*d*<sub>6</sub>, 100 °C) δ = 152.6, 148.5, 129.6, 123.8, 123.2, 118.6, 118.4, 109.5, 86.5, 60.1, 53.7, 45.0, 31.7, 21.7, 13.8. IR (neat): 3369, 2981, 2239, 1687, 1609, 1485, 1470, 1407, 1377, 1333, 1233, 1205, 1160, 1103, 1075, 1055, 1028, 956, 881, 838, 820, 773, 750, 662, 608, 541 cm<sup>-1</sup>; HRMS calculated *m/z* for C<sub>15</sub>H<sub>18</sub>N<sub>3</sub>O<sub>2</sub><sup>+</sup> [M+H]<sup>+</sup>: 272.1394, found (ESI) 272.1394.

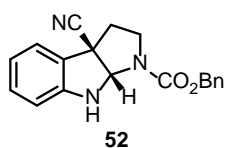

A mixture of **S35** (0.2 mmol, 58.9 mg, 1.0 equiv) and **9** (0.3 mmol, 107.8 mg, 1.5 equiv) in CH<sub>3</sub>CN (2 mL) was stirred at room temperature for 2 h. Column chromatography on silica gel (eluent: hexane to hexane/ethyl acetate = 4:1) afforded **52** in 56% yield (35.9 mg) as a colorless oil. <sup>1</sup>H NMR (400 MHz, DMSO-*d*<sub>6</sub>, 100 °C) δ = 7.50 – 7.26 (m, 6H), 7.17-7.13 (m, 1H), 6.79-6.75 (m, 1H), 6.71-6.68 (m, 1H), 6.58 (bs, 1H), 5.823-5.817 (m, 1H), 5.26 – 5.09 (m, 2H), 3.86 – 3.73 (m, 1H), 3.11-3.04 (m, 1H), 2.72-2.64 (m, 1H), 2.58 – 2.51 (m, 1H). <sup>13</sup>C NMR (101 MHz, DMSO-*d*<sub>6</sub>, 100 °C) δ = 152.9, 149.0, 136.2, 129.7, 127.8, 127.2, 127.0, 123.7, 123.1, 119.8, 118.4, 109.4, 79.6, 66.0, 48.4, 44.3, 35.4. IR (neat): 3254, 2953, 2240, 1698, 1606, 1485, 1471, 1411, 1353, 1318, 1258, 1236, 1200, 1108, 1027, 1008, 943, 888, 820, 747, 697, 585, 522 cm<sup>-1</sup>; HRMS calculated *m/z* for C<sub>19</sub>H<sub>18</sub>N<sub>3</sub>O<sub>2</sub><sup>+</sup> [M+H]<sup>+</sup>: 320.1394, found (ESI) 320.1396.

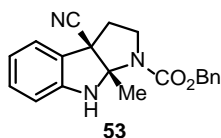

A mixture of **S36** (0.2 mmol, 61.7 mg, 1.0 equiv) and **9** (0.3 mmol, 107.8 mg, 1.5 equiv) in CH<sub>3</sub>CN (2 mL) was stirred at room temperature for 10 minutes. Column chromatography on silica gel (eluent: hexane to hexane/ethyl acetate = 4:1) afforded **53** in 81% yield (53.9 mg) as a colorless oil. <sup>1</sup>H NMR (400 MHz, DMSO-*d*<sub>6</sub>, 100 °C) δ = 7.44 – 7.26 (m, 6H), 7.17-7.13 (m, 1H), 6.80-6.76 (m, 1H), 6.73-6.71 (m, 1H), 6.54 (bs, 1H), 5.14 (s, 2H), 3.70-3.64 (m, 1H), 3.19 – 3.03 (m, 1H), 2.74 – 2.55 (m, 2H), 1.88 (s, 3H). <sup>13</sup>C NMR (101 MHz, DMSO-*d*<sub>6</sub>, 100 °C) δ = 152.5, 148.4, 136.2, 129.7, 127.8, 127.20 126.9, 123.8, 123.2, 118.6, 118.5, 109.5, 86.7, 65.6, 53.7, 45.1, 31.7, 21.6. IR (neat): 3371, 2982, 2239, 1692, 1609, 1486, 1470, 1401, 1350, 1267, 1233, 1204, 1161, 1103, 1072, 1053, 1027, 955, 894, 820, 749, 697, 661, 608, 587, 542, 523 cm<sup>-1</sup>; HRMS calculated m/z for C<sub>20</sub>H<sub>20</sub>N<sub>3</sub>O<sub>2</sub><sup>+</sup> [M+H]<sup>+</sup>: 334.1550, found (ESI) 334.1552.

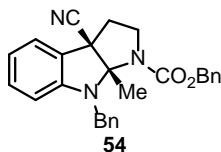

A mixture of **S37** (0.2 mmol, 79.7 mg, 1.0 equiv) and **9** (0.3 mmol, 107.8 mg, 1.5 equiv) in CH<sub>3</sub>CN (2 mL) was stirred at room temperature for 10 minutes. Column chromatography on silica gel (eluent: hexane to hexane/ethyl acetate = 4:1) afforded **54** in 93% yield (78.8 mg) as a white solid. <sup>1</sup>H NMR (400 MHz, DMSO-*d*<sub>6</sub>, 100 °C) δ = 7.46 – 7.25 (m, 8H), 7.24 – 7.16 (m, 3H), 7.11-7.07 (m, 1H), 6.83 – 6.69 (m, 1H), 6.26 (d, *J* = 7.6 Hz, 1H), 5.07 (s, 2H), 4.87 (d, *J* = 17.2 Hz, 1H), 4.63 (d, *J* = 17.2 Hz, 1H), 3.85-3.80 (m, 1H), 3.36 – 3.14 (m, 1H), 2.73 – 2.58 (m, 2H), 2.02 (s, 3H). <sup>13</sup>C NMR (101 MHz, DMSO-*d*<sub>6</sub>, 100 °C) δ = 153.0, 147.8, 138.4, 135.9, 129.7, 127.8, 127.3, 127.1, 126.0, 125.6, 123.4, 122.8, 118.5, 117.8, 107.2, 89.9, 65.9, 54.8, 46.5, 45.9, 32.1, 19.2. IR (neat): 3031, 2239, 1699, 1606, 1488, 1452, 1397, 1349, 1266, 1211, 1185, 1148, 1101, 1071, 1053, 1026, 917, 887, 858, 819, 787, 769, 696, 636, 590, 554, 523 cm<sup>-1</sup>; HRMS calculated m/z for C<sub>27</sub>H<sub>26</sub>N<sub>3</sub>O<sub>2</sub><sup>+</sup> [M+H]<sup>+</sup>: 424.2020, found (ESI) 424.2019.

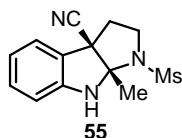

A mixture of **S38** (0.2 mmol, 50.5 mg, 1.0 equiv) and **9** (0.3 mmol, 107.8 mg, 1.5 equiv) in CH<sub>3</sub>CN (2 mL) was stirred at room temperature for 30 minutes. Column chromatography on silica gel (eluent: hexane to hexane/ethyl acetate = 2:1) afforded **55** in 68% yield (37.8 mg) as a white solid. <sup>1</sup>H NMR (400 MHz, Chloroform-*d*) δ = 7.30 – 7.25 (m, 1H), 7.25-7.20 (m, 1H), 6.92-6.88 (m, 1H), 6.71-6.69 (m, 1H), 5.17 (bs, 1H), 3.66-3.61 (m, 1H), 3.17-3.11 (m, 1H), 2.80 (s, 3H), 2.70 – 2.55 (m, 2H), 2.02 (s, 3H). <sup>13</sup>C NMR (101 MHz, Chloroform-*d*) δ = 148.0, 131.2, 124.2, 124.1, 121.0, 118.5, 110.6, 90.0, 55.5, 47.2, 38.9, 33.8, 25.6. IR (neat): 3366, 2876, 2234, 1609, 1484, 1472, 1400, 1386, 1346, 1329, 1244, 1205, 1165, 1110, 1035, 889, 863, 813, 732, 693, 652, 608, 555, 529 cm<sup>-1</sup>; HRMS calculated m/z for C<sub>13</sub>H<sub>16</sub>N<sub>3</sub>O<sub>2</sub>S<sup>+</sup> [M+H]<sup>+</sup>: 278.0958, found (ESI) 278.0956.

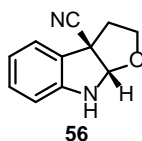

A mixture of **S39** (0.2 mmol, 32.2 mg, 1.0 equiv) and **9** (0.3 mmol, 107.8 mg, 1.5 equiv) in CH<sub>3</sub>CN (2 mL) was stirred at room temperature for 15 minutes. Column chromatography on silica gel (eluent: hexane to hexane/ethyl acetate = 5:1) afforded **56** in 55% yield (20.4 mg) as a colorless oil. <sup>1</sup>H NMR (300 MHz, Chloroform-*d*) δ = 7.28 (d, *J* = 7.5 Hz, 1H), 7.17 (t, *J* = 7.5 Hz, 1H), 6.84 (t, *J* = 7.5 Hz, 1H), 6.63 (d, *J* = 7.8 Hz, 1H), 6.01 (d, *J* = 2.4 Hz, 1H), 4.75 (bs, 1H), 4.14-4.08 (m, 1H), 3.67-3.59 (m, 1H), 2.99 – 2.60 (m, 1H), 2.48-2.41 (m, 1H). <sup>13</sup>C NMR (75 MHz, Chloroform-*d*) δ = 149.0, 130.5, 124.7, 124.5, 120.8, 120.2, 109.4, 97.6, 66.5, 49.8, 40.9. IR (neat): 3383, 2952, 2870, 2244, 1420, 1356, 1333, 1316, 1258, 1229, 1208, 1170, 1118, 1053, 945, 849, 778, 611, 585, 561, 544 cm<sup>-1</sup>; HRMS calculated m/z for C<sub>11</sub>H<sub>11</sub>N<sub>2</sub>O<sup>+</sup> [M+H]<sup>+</sup>: 187.0866, found (ESI) 187.0868.

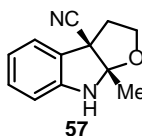

A mixture of **S40** (0.2 mmol, 35.0 mg, 1.0 equiv) and **9** (0.24 mmol, 86.2 mg, 1.2 equiv) in CH<sub>3</sub>CN (2 mL) was stirred at room temperature for 10 minutes. Column chromatography on silica gel (eluent: hexane to hexane/ethyl acetate = 4:1) afforded **57** in 66% yield (26.3 mg) as a white solid. <sup>1</sup>H NMR (400 MHz, Chloroform-*d*) δ = 7.28-7.25 (m, 1H), 7.17-7.13 (m, 1H), 6.84-6.80 (m, 1H), 6.58 (d, *J* = 8.0 Hz, 1H), 4.44 (bs, 1H), 4.07-4.02 (m, 1H), 3.65-3.59 (m, 1H), 2.78 – 2.54 (m, 1H), 2.46-2.42 (m, 1H), 1.81 (s, 3H). <sup>13</sup>C NMR (101 MHz, Chloroform-*d*) δ = 148.5, 130.5, 125.2, 124.7, 120.2, 120.0, 109.1, 103.7, 65.9, 53.5, 41.7, 24.8. IR (neat): 3348, 2991, 2874, 2243, 1609, 1487, 1471, 1416, 1383, 1343, 1318, 1282, 1198, 1181, 1133, 1110, 1092, 991, 943, 911, 896, 861, 678, 608, 567, 542 cm<sup>-1</sup>; HRMS calculated m/z for C<sub>12</sub>H<sub>13</sub>N<sub>2</sub>O<sup>+</sup> [M+H]<sup>+</sup>: 201.1022, found (ESI) 201.1022.

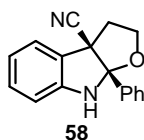

A mixture of **S41** (0.2 mmol, 47.5 mg, 1.0 equiv) and **9** (0.24 mmol, 86.2 mg, 1.2 equiv) in CH<sub>3</sub>CN (2 mL) was stirred at room temperature for 10 minutes. Column chromatography on silica gel (eluent: hexane to hexane/ethyl acetate = 4:1) afforded **58** in 89% yield (46.5 mg) as a white solid. <sup>1</sup>H NMR (400 MHz, Chloroform-*d*) δ = 7.67 – 7.55 (m, 2H), 7.47 – 7.34 (m, 3H), 7.29 – 7.15 (m, 2H), 6.87-6.83 (m, 1H), 6.67 (d, *J* = 8.0 Hz, 1H), 4.79 (bs, 1H), 4.42 – 4.20 (m, 1H), 3.83-3.76 (m, 1H), 2.89 – 2.66 (m, 1H), 2.53-2.49 (m, 1H). <sup>13</sup>C NMR (101 MHz, Chloroform-*d*) δ = 149.2, 139.2, 130.6, 129.5, 128.6, 126.6, 124.8, 124.2, 120.1, 119.6, 108.7, 106.4, 67.0, 56.8, 41.1. IR (neat): 3390, 2895, 2232, 1610, 1486, 1470, 1445, 1392, 1354, 1324, 1281, 1232, 1133, 1094, 1070, 1035, 1022, 958, 942, 916, 889, 852, 762, 699, 662, 583, 536 cm<sup>-1</sup>; HRMS calculated m/z for C<sub>17</sub>H<sub>15</sub>N<sub>2</sub>O<sup>+</sup> [M+H]<sup>+</sup>: 263.1179, found (ESI) 263.1183.

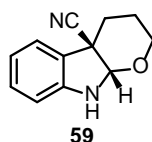

A mixture of **S42** (0.2 mmol, 35.0 mg, 1.0 equiv) and **9** (0.24 mmol, 86.2 mg, 1.2 equiv) in CH<sub>3</sub>CN (2 mL) was stirred at room temperature for 10 minutes. Column chromatography on silica gel (eluent: hexane to hexane/ethyl acetate = 4:1) afforded **59** in 64% yield (25.8 mg)

as a white solid.  $^1\text{H}$  NMR (400 MHz, Chloroform-*d*)  $\delta$  = 7.25 (d,  $J$  = 7.2 Hz, 1H), 7.19 (t,  $J$  = 7.6 Hz, 1H), 6.88 (t,  $J$  = 7.6 Hz, 1H), 6.75 (d,  $J$  = 8.0 Hz, 1H), 5.35 (s, 1H), 4.45 (bs, 1H), 3.91 – 3.79 (m, 1H), 3.69 – 3.52 (m, 1H), 2.34-2.31 (m, 2H), 1.79 – 1.64 (m, 1H), 1.61 – 1.46 (m, 1H).  $^{13}\text{C}$  NMR (101 MHz, Chloroform-*d*)  $\delta$  = 148.1, 130.1, 125.7, 123.4, 121.2, 120.5, 110.9, 91.3, 61.7, 42.0, 29.1, 19.9. IR (neat): 3300, 2975, 2936, 2873, 2231, 1607, 1486, 1470, 1420, 1362, 1348, 1323, 1271, 1238, 1211, 1159, 1090, 1066, 1051, 1004, 970, 943, 909, 891, 868, 762, 747, 706, 665, 596, 558, 529, 506  $\text{cm}^{-1}$ ; HRMS calculated  $m/z$  for  $\text{C}_{12}\text{H}_{13}\text{N}_2\text{O}^+$   $[\text{M}+\text{H}]^+$ : 201.1022, found (ESI) 201.1022.

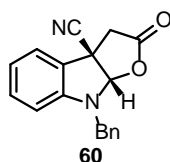

A mixture of **S43** (0.2 mmol, 73.1 mg, 1.0 equiv) and **9** (0.24 mmol, 86.2 mg, 1.2 equiv) in DCM (2 mL) was stirred at room temperature for 12 h. Column chromatography on silica gel (eluent: hexane to hexane/ethyl acetate = 4:1) afforded **60** in 19% yield (11.0 mg) as a white solid.  $^1\text{H}$  NMR (400 MHz, Chloroform-*d*)  $\delta$  = 7.44 – 7.22 (m, 7H), 6.99 – 6.89 (m, 1H), 6.61 (d,  $J$  = 8.0 Hz, 1H), 5.97 (s, 1H), 4.73 – 4.35 (m, 2H), 3.48 – 3.17 (m, 2H).  $^{13}\text{C}$  NMR (101 MHz, Chloroform-*d*)  $\delta$  = 170.7, 147.9, 135.3, 131.8, 129.2, 128.3, 128.1, 124.6, 124.4, 121.3, 117.6, 109.3, 98.8, 49.2, 44.1, 40.1. IR (neat): 2918, 2849, 2248, 1783, 1706, 1600, 1485, 1454, 1417, 1384, 1338, 1303, 1284, 1249, 1205, 1188, 1144, 1100, 1066, 1043, 1026, 1006, 973, 920, 905, 852, 825, 805, 740, 696, 655, 599, 561, 547  $\text{cm}^{-1}$ ; HRMS calculated  $m/z$  for  $\text{C}_{18}\text{H}_{15}\text{N}_2\text{O}_2^+$   $[\text{M}+\text{H}]^+$ : 291.1128, found (ESI) 291.1128.

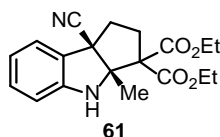

A mixture of **S44** (0.2 mmol, 63.5 mg, 1.0 equiv) and **9** (0.3 mmol, 107.8 mg, 1.5 equiv) in  $\text{CH}_3\text{CN}$  (2 mL) was stirred at room temperature for 5 minutes. Column chromatography on silica gel (eluent: hexane to hexane/ethyl acetate = 4:1) afforded **61** in 86% yield (59.1 mg) as a colorless oil.  $^1\text{H}$  NMR (400 MHz, Chloroform-*d*)  $\delta$  = 7.29 (d,  $J$  = 7.6 Hz, 1H), 7.13-7.09 (m,

1H), 6.83-6.79 (m, 1H), 6.57 (d,  $J = 8.0$  Hz, 1H), 4.39 – 4.20 (m, 4H), 4.07 (bs, 1H), 3.01-2.93 (m, 1H), 2.45-2.36 (m, 1H), 2.33 – 2.24 (m, 1H), 2.22 – 2.07 (m, 1H), 1.79 (s, 3H), 1.41 – 1.22 (m, 6H).  $^{13}\text{C}$  NMR (101 MHz, Chloroform- $d$ )  $\delta = 170.2, 169.4, 147.6, 129.74, 128.7, 124.3, 121.1, 120.0, 110.0, 79.4, 69.1, 62.1, 61.5, 55.4, 39.8, 32.8, 21.7, 14.1, 14.0$ . IR (neat): 3350, 2980, 2239, 1721, 1605, 1487, 1469, 1445, 1366, 1316, 1262, 1223, 1174, 1147, 1107, 1061, 1037, 1016, 941, 912, 858, 745, 649, 569, 532  $\text{cm}^{-1}$ ; HRMS calculated  $m/z$  for  $\text{C}_{19}\text{H}_{23}\text{N}_2\text{O}_4^+$   $[\text{M}+\text{H}]^+$ : 343.1652, found (ESI) 343.1656.

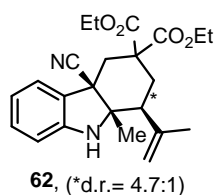

A mixture of **S45** (0.2 mmol, 74.3 mg, 1.0 equiv) and **9** (0.24 mmol, 86.2 mg, 1.2 equiv) in DCM (2 mL) was stirred at room temperature for 11 h. Column chromatography on silica gel (eluent: hexane to hexane/ethyl acetate = 10:1) afforded **62-minor** in 17% yield (13.4 mg) and **62-major** in 79% yield (62.6 mg) both as a colorless oils.

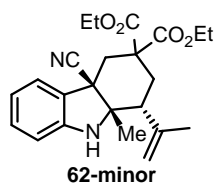

$^1\text{H}$  NMR (400 MHz, Chloroform- $d$ )  $\delta = 7.33 - 7.26$  (m, 1H), 7.16-7.12 (m, 1H), 6.85-6.81 (m, 1H), 6.69 (d,  $J = 8.0$  Hz, 1H), 5.14 – 4.94 (m, 2H), 4.48 – 4.35 (m, 1H), 4.33 – 4.19 (m, 1H), 4.23 – 4.03 (m, 2H), 3.59 (bs, 1H), 2.87-2.83 (m, 1H), 2.71-2.67 (m, 1H), 2.34 – 2.23 (m, 1H), 2.10 – 1.95 (m, 2H), 1.96 – 1.87 (m, 3H), 1.35 (t,  $J = 7.2$  Hz, 3H), 1.31 (s, 3H), 1.21 (t,  $J = 7.2$  Hz, 3H).  $^{13}\text{C}$  NMR (101 MHz, Chloroform- $d$ )  $\delta = 170.8, 169.7, 146.9, 145.9, 130.3, 129.5, 123.3, 120.0, 119.6, 114.4, 111.5, 67.8, 62.0, 62.0, 52.7, 47.7, 44.4, 38.4, 32.4, 25.1, 24.5, 14.1, 14.0$ . IR (neat): 3357, 2977, 2240, 1641, 1608, 1482, 1466, 1444, 1376, 1318, 1239, 1218, 1175, 1147, 1127, 1077, 1056, 1020, 907, 859, 807, 749, 732, 635, 601, 561, 516  $\text{cm}^{-1}$ ; HRMS calculated  $m/z$  for  $\text{C}_{23}\text{H}_{29}\text{N}_2\text{O}_4^+$   $[\text{M}+\text{H}]^+$ : 397.2122, found (ESI) 397.2127.



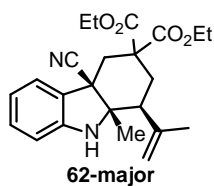

$^1\text{H}$  NMR (400 MHz, Chloroform-*d*)  $\delta$  = 7.21 (d,  $J$  = 7.6 Hz, 1H), 7.14-7.10 (m, 1H), 6.79-6.75 (m, 1H), 6.63 (d,  $J$  = 7.6 Hz, 1H), 5.03 (t,  $J$  = 1.6 Hz, 1H), 4.80 – 4.62 (m, 1H), 4.42 (bs, 1H), 4.34 – 4.15 (m, 2H), 4.16 – 4.03 (m, 1H), 4.02 – 3.87 (m, 1H), 3.11-3.07 (m, 1H), 2.76 (d,  $J$  = 15.2 Hz, 1H), 2.72-2.68 (m, 1H), 2.30-2.25 (m, 1H), 1.85 (t,  $J$  = 13.6 Hz, 1H), 1.80 (s, 3H), 1.47 (s, 3H), 1.27 (t,  $J$  = 7.2 Hz, 3H), 1.16 (t,  $J$  = 7.2 Hz, 3H).  $^{13}\text{C}$  NMR (101 MHz, Chloroform-*d*)  $\delta$  = 170.8, 170.0, 148.6, 143.9, 130.3, 125.5, 124.7, 120.6, 119.4, 116.0, 110.9, 68.0, 62.3, 61.9, 52.6, 50.0, 44.3, 32.1, 30.6, 21.8, 18.5, 14.1, 13.8. IR (neat): 3362, 2980, 2231, 1727, 1607, 1482, 1467, 1385, 1368, 1328, 1299, 1248, 1197, 1156, 1093, 1050, 1020, 964, 908, 858, 797, 730, 647, 621, 591, 551  $\text{cm}^{-1}$ ; HRMS calculated  $m/z$  for  $\text{C}_{23}\text{H}_{29}\text{N}_2\text{O}_4^+$   $[\text{M}+\text{H}]^+$ : 397.2122, found (ESI) 397.2126.

## 6. Metal-free cyanation/Povarov cycloaddition of indole derivatives

**General procedure of the cyanation/Povarov cycloaddition of indole derivatives: preparation of 63-68.**

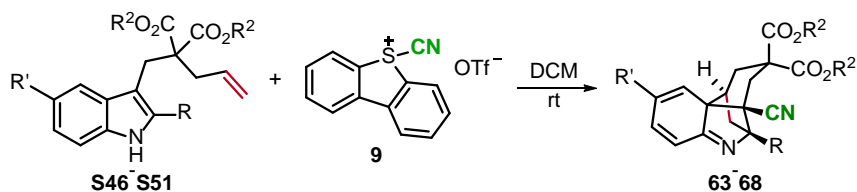

Compound **9** was added to a stirred solution of indole derivatives **S46-S51** (0.2 mmol, 1.0 equiv) in DCM (2 mL) at room temperature and the resulting mixture was stirred for the specified time (vide infra). Then, the reaction was quenched with water, extracted with DCM, and the organic phase dried over anhydrous  $\text{Na}_2\text{SO}_4$ . Evaporation of the solvent under reduced pressure afforded a residue, which was purified by column chromatography on silica gel to afford the desired products.

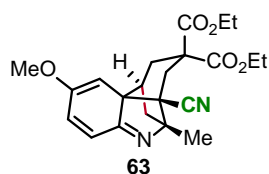

A mixture of **S46** (0.2 mmol, 74.7 mg, 1.0 equiv) and **9** (0.3 mmol, 107.8 mg, 1.5 equiv) in DCM (2 mL) was stirred at room temperature for 4 h. Column chromatography on silica gel (eluent: hexane to hexane/ethyl acetate = 2:1) afforded **63** in 80% yield (63.9 mg) as a colorless oil.  $^1\text{H}$  NMR (400 MHz, Chloroform-*d*)  $\delta$  = 6.63 – 6.40 (m, 2H), 5.36 (s, 1H), 4.42 – 4.11 (m, 4H), 3.72 (s, 3H), 3.03 (d,  $J$  = 16.4 Hz, 1H), 2.81-2.76 (m, 1H), 2.63-2.58 (m, 1H), 2.42 (d,  $J$  = 16.4 Hz, 1H), 1.72 (s, 3H), 1.70 – 1.60 (m, 1H), 1.37 – 1.21 (m, 7H), 1.08-1.03 (m, 1H).  $^{13}\text{C}$  NMR (101 MHz, Chloroform-*d*)  $\delta$  = 175.2, 172.3, 172.1, 156.0, 135.5, 122.9, 120.2, 94.6, 78.5, 67.1, 62.7, 62.6, 59.5, 55.0, 50.2, 35.0, 31.7, 30.5, 29.8, 16.8, 14.0, 14.0. IR (neat): 2963, 2254, 1724, 1642, 1568, 1463, 1414, 1386, 1367, 1239, 1212, 1189, 1141, 1086, 1029, 977, 913, 886, 860, 813, 784, 731, 649, 612, 541, 510  $\text{cm}^{-1}$ ; HRMS calculated  $m/z$  for  $\text{C}_{22}\text{H}_{27}\text{N}_2\text{O}_5^+$   $[\text{M}+\text{H}]^+$ : 399.1914, found (ESI) 399.1918.

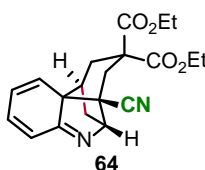

A mixture of **S47** (0.2 mmol, 65.9 mg, 1.0 equiv) and **9** (0.2 mmol, 71.9 mg, 1.0 equiv) in DCM (2 mL) was stirred at room temperature for 3 h. Column chromatography on silica gel (eluent: hexane to hexane/ethyl acetate = 1:1) followed by preparative HPLC afforded **64** in 67% yield (47.6 mg) as a colorless oil.  $^1\text{H}$  NMR (400 MHz, Chloroform-*d*)  $\delta$  = 6.79 – 6.67 (m, 1H), 6.65 – 6.46 (m, 3H), 4.60 (d,  $J$  = 3.6 Hz, 1H), 4.37 – 4.15 (m, 4H), 2.99 (d,  $J$  = 16.4 Hz, 1H), 2.83-2.79 (m, 1H), 2.61 – 2.46 (m, 2H), 1.75 – 1.65 (m, 1H), 1.65 – 1.55 (m, 1H), 1.36 – 1.21 (m, 6H), 0.97-0.92 (m, 1H).  $^{13}\text{C}$  NMR (101 MHz, Chloroform-*d*)  $\delta$  = 176.9, 172.4, 171.6, 134.6, 130.1, 128.7, 122.3, 120.4, 72.8, 64.5, 62.7, 62.7, 59.4, 50.2, 32.9, 30.9, 25.9, 14.1. IR (neat): 2981, 2237, 1633, 1560, 1444, 1367, 1253, 1190, 1145, 1092, 1051, 1019, 934, 909, 858, 809, 746, 696, 648, 627, 589, 565  $\text{cm}^{-1}$ ; HRMS calculated  $m/z$  for  $\text{C}_{20}\text{H}_{23}\text{N}_2\text{O}_4^+$   $[\text{M}+\text{H}]^+$ : 355.1652, found (ESI) 355.1654.

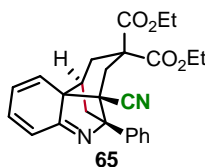

A mixture of **S48** (0.2 mmol, 81.1 mg, 1.0 equiv) and **9** (0.3 mmol, 107.8 mg, 1.5 equiv) in DCM (2 mL) was stirred at room temperature for 36 h. Column chromatography on silica gel (eluent: hexane to hexane/ethyl acetate = 2:1) afforded **65** in 78% yield (66.8 mg) as a white solid.  $^1\text{H NMR}$  (400 MHz, Chloroform-*d*)  $\delta$  = 7.65 (d,  $J$  = 8.0 Hz, 2H), 7.44 (t,  $J$  = 7.6 Hz, 2H), 7.41 – 7.32 (m, 1H), 6.81-6.77 (m, 1H), 6.72 – 6.53 (m, 3H), 4.42 – 4.09 (m, 4H), 3.05 (dd,  $J$  = 14.8, 3.6 Hz, 1H), 2.86 (d,  $J$  = 17.2 Hz, 1H), 2.67 (d,  $J$  = 17.2 Hz, 1H), 2.44 – 2.27 (m, 2H), 1.90-1.87 (m, 1H), 1.39 – 1.15 (m, 7H).  $^{13}\text{C NMR}$  (101 MHz, Chloroform-*d*)  $\delta$  = 176.0, 172.6, 172.1, 136.2, 134.9, 130.8, 128.4, 128.4, 128.2, 128.0, 122.1, 119.7, 83.1, 69.6, 62.8, 62.7, 61.3, 49.3, 34.9, 31.4, 29.5, 28.9, 14.0. IR (neat): 2977, 2235, 1748, 1720, 1634, 1566, 1499, 1445, 1365, 1316, 1298, 1252, 1234, 1193, 1147, 1093, 1073, 1031, 1007, 902, 864, 813, 763, 747, 720, 695, 645, 632, 607, 584, 552  $\text{cm}^{-1}$ ; HRMS calculated  $m/z$  for  $\text{C}_{26}\text{H}_{27}\text{N}_2\text{O}_4^+$   $[\text{M}+\text{H}]^+$ : 431.1965, found (ESI) 431.1966.

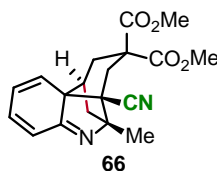

A mixture of **S49** (0.2 mmol, 63.1 mg, 1.0 equiv) and **9** (0.2 mmol, 71.9 mg, 1.0 equiv) in DCM (2 mL) was stirred at room temperature for 4 h. Column chromatography on silica gel (eluent: hexane to hexane/ethyl acetate = 1:1) afforded **66** in 76% yield (51.4 mg) as a colorless oil.  $^1\text{H NMR}$  (400 MHz, Chloroform-*d*)  $\delta$  = 6.77 – 6.69 (m, 1H), 6.64 – 6.55 (m, 2H), 6.52-6.49 (m, 1H), 3.84 (s, 3H), 3.78 (s, 3H), 3.03 (d,  $J$  = 16.4 Hz, 1H), 2.85-2.80 (m, 1H), 2.58-2.54 (m, 1H), 2.49 (d,  $J$  = 16.4 Hz, 1H), 1.81 – 1.74 (m, 1H), 1.73 (s, 3H), 1.32-1.28 (m, 1H), 1.05-0.99 (m, 1H).  $^{13}\text{C NMR}$  (101 MHz, Chloroform-*d*)  $\delta$  = 175.5, 172.7, 172.2, 134.7, 130.4, 128.5, 122.0, 119.9, 78.2, 67.5, 60.1, 53.8, 53.7, 50.3, 34.8, 31.3, 30.7, 29.8, 16.7. IR (neat): 2956, 2239, 1719, 1635, 1560, 1457, 1431, 1383, 1340, 1269, 1234, 1201, 1179, 1148, 1106, 1086, 1004, 969, 911, 872, 861, 838, 797, 749, 731, 649, 632, 611, 572  $\text{cm}^{-1}$ ; HRMS calculated  $m/z$  for  $\text{C}_{19}\text{H}_{21}\text{N}_2\text{O}_4^+$   $[\text{M}+\text{H}]^+$ : 341.1496, found (ESI) 341.1500.

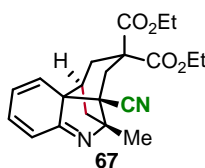

A mixture of **S50** (0.2 mmol, 68.7 mg, 1.0 equiv) and **9** (0.2 mmol, 71.9 mg, 1.0 equiv) in DCM (2 mL) was stirred at room temperature for 3 h. Column chromatography on silica gel (eluent: hexane to hexane/ethyl acetate = 1:1) afforded **67** in 85% yield (62.7 mg) as a colorless oil.  $^1\text{H}$  NMR (400 MHz, Chloroform-*d*)  $\delta$  = 6.75 – 6.71 (m, 1H), 6.62-6.56 (m, 2H), 6.50 (d,  $J$  = 9.6 Hz, 1H), 4.40 – 4.16 (m, 4H), 3.02 (d,  $J$  = 16.4 Hz, 1H), 2.83-2.78 (m, 1H), 2.60 – 2.51 (m, 1H), 2.51 – 2.40 (m, 1H), 1.74 (m, 4H), 1.30 (m, 7H), 1.04-0.99 (m, 1H).  $^{13}\text{C}$  NMR (101 MHz, Chloroform-*d*)  $\delta$  = 175.5, 172.3, 171.7, 134.6, 130.6, 128.4, 121.9, 120.0, 78.2, 67.4, 62.7, 62.7, 60.2, 50.3, 34.9, 31.2, 30.6, 29.7, 16.7, 14.1, 14.0. IR (neat): 2976, 2235, 1721, 1632, 1561, 1467, 1444, 1380, 1366, 1298, 1245, 1190, 1147, 1079, 1040, 1016, 909, 861, 819, 782, 749, 629, 608, 572, 511  $\text{cm}^{-1}$ ; HRMS calculated  $m/z$  for  $\text{C}_{21}\text{H}_{25}\text{N}_2\text{O}_4^+$   $[\text{M}+\text{H}]^+$ : 369.1809, found (ESI) 369.1812.

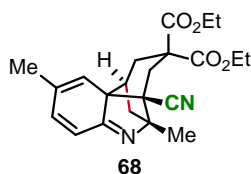

A mixture of **S51** (0.2 mmol, 71.5 mg, 1.0 equiv) and **9** (0.2 mmol, 71.9 mg, 1.0 equiv) in DCM (2 mL) was stirred at room temperature for 3 h. Column chromatography on silica gel (eluent: hexane to hexane/ethyl acetate = 1:1) afforded **68** in 81% yield (61.6 mg) as a colorless oil.  $^1\text{H}$  NMR (400 MHz, Chloroform-*d*)  $\delta$  = 6.59-6.56 (m, 1H), 6.47-6.45 (m, 1H), 6.26-6.24 (m, 1H), 4.43 – 3.99 (m, 4H), 3.01 (d,  $J$  = 16.4 Hz, 1H), 2.80-2.75 (m, 1H), 2.58-2.54 (m, 1H), 2.44 (d,  $J$  = 16.4 Hz, 1H), 2.05 (d,  $J$  = 1.6 Hz, 3H), 1.73-1.69 (m, 4H), 1.34-1.26 (m, 7H), 1.04-0.98 (m, 1H).  $^{13}\text{C}$  NMR (101 MHz, Chloroform-*d*)  $\delta$  = 175.5, 172.3, 171.7, 139.1, 136.5, 124.5, 121.5, 120.2, 78.3, 67.3, 62.7, 62.6, 60.0, 50.3, 34.7, 31.5, 30.4, 29.7, 22.4, 16.7, 14.0, 14.0. IR (neat): 2980, 1727, 1563, 1441, 1383, 1234, 1196, 1176, 1142, 1083, 1065,

1022, 905, 857, 799, 723, 644, 607, 549, 512  $\text{cm}^{-1}$ ; HRMS calculated  $m/z$  for  $\text{C}_{22}\text{H}_{27}\text{N}_2\text{O}_4^+$   
[M+H]<sup>+</sup>: 383.1965, found (ESI) 383.1968.

## 7. Intermolecular cyanation-[4+2] cycloaddition

### Procedure for the preparation of **69**

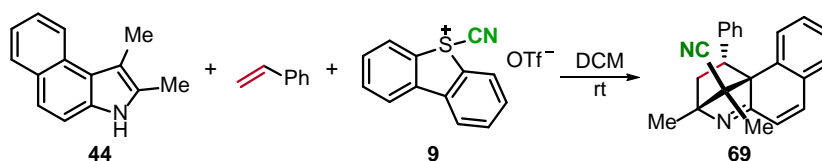

Salt **9** (86.2 mg, 0.24 mmol, 1.2 equiv) was added to a stirred solution of 1,2-dimethyl-3*H*-benzo[*e*]indole **44** (39.1 mg, 0.2 mmol, 1.0 equiv) in DCM (2 mL) at room temperature and the resulting mixture was stirred for 10 minutes. Then, styrene (34.5  $\mu$ L, 0.3 mmol, 1.5 equiv) was added and the resulting mixture stirred at room temperature for additional 11 h. Subsequently, the reaction was quenched with water, extracted with DCM and the organic phase dried over anhydrous  $\text{Na}_2\text{SO}_4$ . Evaporation of the solvent under reduced pressure afforded a residue, which was purified by column chromatography on silica gel (eluent: hexane to hexane/ethyl acetate = 4:1) to afford **69** (57.7 mg, 89% yield) as a white solid.  $^1\text{H}$  NMR (400 MHz, Chloroform-*d*)  $\delta$  = 7.99 (d,  $J$  = 7.6 Hz, 1H), 7.49 – 7.40 (m, 1H), 7.34 – 7.24 (m, 1H), 7.11 – 7.00 (m, 2H), 6.95 (t,  $J$  = 7.6 Hz, 2H), 6.72 – 6.61 (m, 2H), 6.55 (d,  $J$  = 9.6 Hz, 1H), 6.22 (d,  $J$  = 9.6 Hz, 1H), 4.08-4.04 (m, 1H), 2.75-2.69 (m, 1H), 1.85 – 1.73 (m, 4H), 0.97 (s, 3H).  $^{13}\text{C}$  NMR (101 MHz, Chloroform-*d*)  $\delta$  = 173.0, 139.1, 137.1, 135.3, 133.5, 129.4, 129.1, 128.2, 128.0, 127.5, 127.1, 125.8, 122.3, 121.8, 77.9, 67.5, 63.1, 51.0, 34.8, 16.8, 13.6. IR (neat): 2976, 2225, 1614, 1571, 1498, 1451, 1373, 1294, 1173, 1160, 1093, 1035, 909, 870, 847, 805, 754, 729, 706, 601, 581, 555, 535, 510  $\text{cm}^{-1}$ ; HRMS calculated  $m/z$  for  $\text{C}_{23}\text{H}_{21}\text{N}_2^+$   $[\text{M}+\text{H}]^+$ : 325.1699, found (ESI) 325.1703.

### Procedure for the preparation of **70**

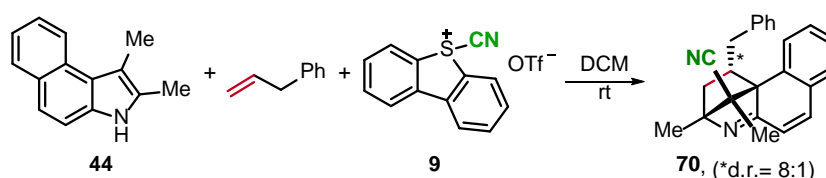

Salt **9** (86.2 mg, 0.24 mmol, 1.2 equiv) and allylbenzene (39.8  $\mu$ L, 0.3 mmol, 1.5 equiv) were successively added to a stirred solution of 1,2-dimethyl-3*H*-benzo[*e*]indole **44** (39.1 mg, 0.2 mmol, 1.0 equiv) in DCM (2 mL) at room temperature, and the resulting mixture was

stirred at room temperature for 37 h. Then, the reaction was quenched with water, extracted with DCM and the organic phase dried over anhydrous Na<sub>2</sub>SO<sub>4</sub>. Evaporation of the solvents under reduced pressure afforded a residue, which was purified by column chromatography on silica gel (eluent: hexane to hexane/ethyl acetate = 4:1) to afford **70** (58.7 mg, 87% yield, d.r.= 8:1 based on <sup>1</sup>H NMR analysis). Separation of the isomers was only possible by preparative HPLC.

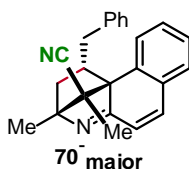

<sup>1</sup>H NMR (400 MHz, Chloroform-*d*)  $\delta$  = 7.89 (d,  $J$  = 7.6 Hz, 1H), 7.49 – 7.33 (m, 3H), 7.23 – 7.06 (m, 4H), 6.98 – 6.83 (m, 2H), 6.65 – 6.48 (m, 1H), 3.21 – 3.02 (m, 1H), 2.42-2.38 (m, 1H), 2.34 – 2.22 (m, 1H), 2.01 – 1.89 (m, 1H), 1.63 (s, 3H), 1.07-1.02 (m, 1H), 0.94 (s, 3H). <sup>13</sup>C NMR (101 MHz, Chloroform-*d*)  $\delta$  = 173.4, 140.1, 139.5, 135.8, 133.7, 129.8, 129.5, 128.6, 128.4, 128.4, 126.3, 125.7, 122.2, 121.9, 65.5, 63.0, 48.2, 36.3, 34.0, 16.9, 13.5. IR (neat): 2974, 2933, 2227, 1612, 1571, 1497, 1450, 1388, 1376, 1296, 1212, 1166, 1119, 982, 943, 906, 867, 808, 753, 735, 705, 660, 623, 585, 544, 509 cm<sup>-1</sup>; HRMS calculated  $m/z$  for C<sub>24</sub>H<sub>23</sub>N<sub>2</sub><sup>+</sup> [M+H]<sup>+</sup>: 339.1856, found (ESI) 339.1857.

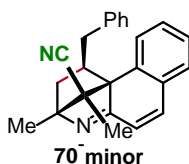

<sup>1</sup>H NMR (400 MHz, Chloroform-*d*)  $\delta$  = 7.87 – 7.78 (m, 1H), 7.47 – 7.35 (m, 3H), 7.24 – 7.17 (m, 2H), 7.18 – 7.11 (m, 2H), 7.11 – 7.03 (m, 2H), 6.43 (d,  $J$  = 9.6 Hz, 1H), 3.36 (t,  $J$  = 13.2 Hz, 1H), 2.62-2.57 (m, 1H), 2.11-2.06 (m, 1H), 2.01 – 1.87 (m, 1H), 1.68 (s, 3H), 1.39-1.33 (m, 1H), 1.00 (s, 3H). <sup>13</sup>C NMR (101 MHz, Chloroform-*d*)  $\delta$  = 176.0, 140.0, 139.9, 134.8, 133.0, 130.0, 128.8, 128.7, 128.6, 128.4, 128.3, 126.3, 123.5, 119.4, 65.1, 58.0, 43.0, 37.0, 36.9, 16.6, 14.9. IR (neat): 3026, 2968, 2934, 2226, 1614, 1573, 1496, 1450, 1404, 1384, 1293, 1210, 1163, 1119, 1030, 988, 951, 909, 864, 813, 757, 730, 700, 660, 642, 611, 584, 548, 531, 515 cm<sup>-1</sup>; HRMS calculated  $m/z$  for C<sub>24</sub>H<sub>23</sub>N<sub>2</sub><sup>+</sup> [M+H]<sup>+</sup>: 339.1856, found (ESI) 339.1859.

## 8. Control experiments

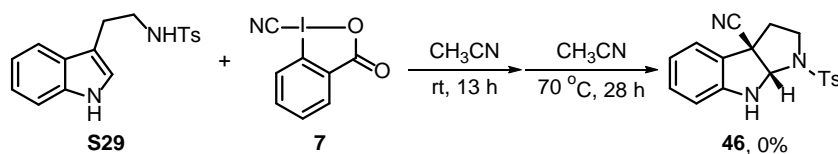

Compound **7**<sup>[25]</sup> (81.9 mg, 0.3 mmol, 1.5 equiv) was added at room temperature under nitrogen flow to a stirred solution of **S29** (62.9 mg, 0.2 mmol, 1.0 equiv) in  $\text{CH}_3\text{CN}$  (2 mL). The resulting mixture was stirred at room temperature for 13 h. No trace of desired product **46** was observed. Then, the reaction was stirred at  $70^\circ\text{C}$  for additional 28 h. without observing any change.

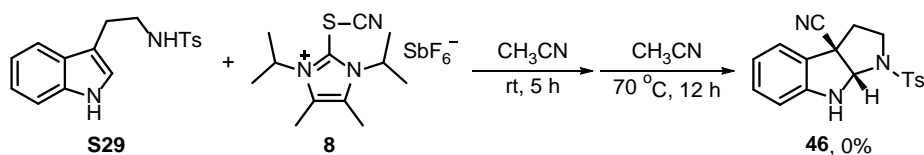

To a stirred solution of **S29** (62.9 mg, 0.2 mmol, 1.0 equiv) in  $\text{CH}_3\text{CN}$  (2 mL) **8**<sup>[23]</sup> (142.2 mg, 0.3 mmol, 1.5 equiv) was added at room temperature under nitrogen flow. The resulting mixture was stirred at room temperature for 5 h. No desired product **46** was observed. Stirring the reaction at  $70^\circ\text{C}$  for additional 12 h. did not change the result.



## 9. X-ray crystal structure

### X-ray crystal structure of 9

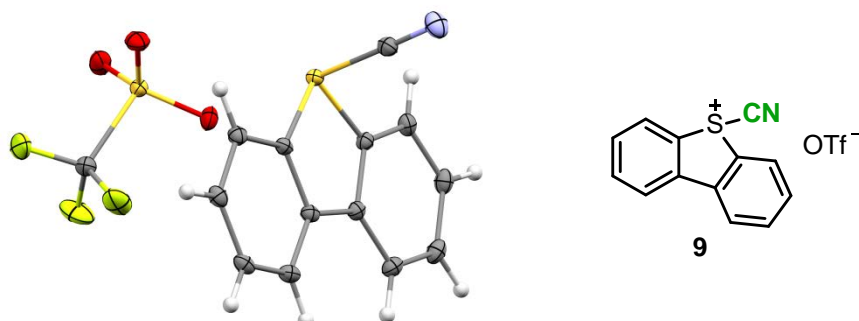

|                                             |                                                                              |
|---------------------------------------------|------------------------------------------------------------------------------|
| Empirical formula                           | C <sub>14</sub> H <sub>8</sub> F <sub>3</sub> NO <sub>3</sub> S <sub>2</sub> |
| Formula weight                              | 359.33                                                                       |
| Temperature/K                               | 101.44                                                                       |
| Crystal system                              | monoclinic                                                                   |
| Space group                                 | P2 <sub>1</sub> /n                                                           |
| a/Å                                         | 6.7928(3)                                                                    |
| b/Å                                         | 14.0411(6)                                                                   |
| c/Å                                         | 15.2306(7)                                                                   |
| α/°                                         | 90                                                                           |
| β/°                                         | 90.599(2)                                                                    |
| γ/°                                         | 90                                                                           |
| Volume/Å <sup>3</sup>                       | 1452.59(11)                                                                  |
| Z                                           | 4                                                                            |
| ρ <sub>calc</sub> /cm <sup>3</sup>          | 1.643                                                                        |
| μ/mm <sup>-1</sup>                          | 0.413                                                                        |
| F(000)                                      | 728.0                                                                        |
| Crystal size/mm <sup>3</sup>                | 0.416 × 0.27 × 0.263                                                         |
| Radiation                                   | MoKα (λ = 0.71073)                                                           |
| 2θ range for data collection/°              | 5.35 to 63.02                                                                |
| Index ranges                                | -9 ≤ h ≤ 9, -20 ≤ k ≤ 20, -22 ≤ l ≤ 22                                       |
| Reflections collected                       | 66179                                                                        |
| Independent reflections                     | 4789 [R <sub>int</sub> = 0.0186, R <sub>sigma</sub> = 0.0104]                |
| Data/restraints/parameters                  | 4789/0/208                                                                   |
| Goodness-of-fit on F <sup>2</sup>           | 1.079                                                                        |
| Final R indexes [I ≥ 2σ (I)]                | R <sub>1</sub> = 0.0251, wR <sub>2</sub> = 0.0680                            |
| Final R indexes [all data]                  | R <sub>1</sub> = 0.0252, wR <sub>2</sub> = 0.0682                            |
| Largest diff. peak/hole / e Å <sup>-3</sup> | 0.50/-0.34                                                                   |

## X-ray crystal structure of 22

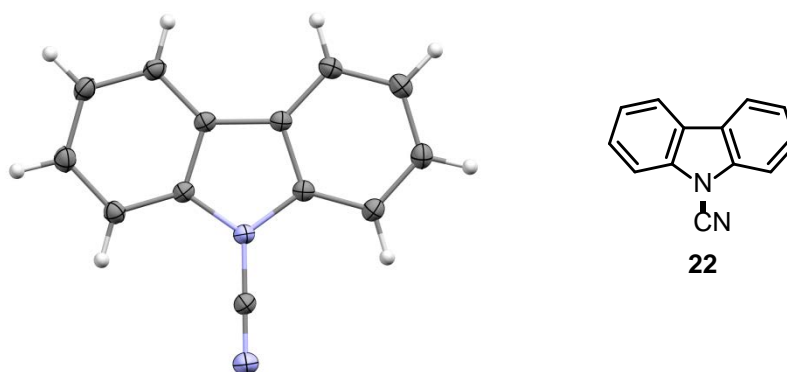

|                                             |                                                               |
|---------------------------------------------|---------------------------------------------------------------|
| Empirical formula                           | C <sub>13</sub> H <sub>8</sub> N <sub>2</sub>                 |
| Formula weight                              | 192.21                                                        |
| Temperature/K                               | 100.0                                                         |
| Crystal system                              | triclinic                                                     |
| Space group                                 | P-1                                                           |
| a/Å                                         | 8.0477(7)                                                     |
| b/Å                                         | 8.1521(7)                                                     |
| c/Å                                         | 14.5994(14)                                                   |
| α/°                                         | 94.263(3)                                                     |
| β/°                                         | 93.278(3)                                                     |
| γ/°                                         | 93.638(3)                                                     |
| Volume/Å <sup>3</sup>                       | 951.38(15)                                                    |
| Z                                           | 4                                                             |
| ρ <sub>calc</sub> /cm <sup>3</sup>          | 1.342                                                         |
| μ/mm <sup>-1</sup>                          | 0.081                                                         |
| F(000)                                      | 400.0                                                         |
| Crystal size/mm <sup>3</sup>                | 0.421 × 0.22 × 0.219                                          |
| Radiation                                   | MoKα (λ = 0.71073)                                            |
| 2θ range for data collection/°              | 5.082 to 63.192                                               |
| Index ranges                                | -11 ≤ h ≤ 11, -11 ≤ k ≤ 12, -21 ≤ l ≤ 21                      |
| Reflections collected                       | 34993                                                         |
| Independent reflections                     | 6331 [R <sub>int</sub> = 0.0279, R <sub>sigma</sub> = 0.0205] |
| Data/restraints/parameters                  | 6331/0/271                                                    |
| Goodness-of-fit on F <sup>2</sup>           | 1.153                                                         |
| Final R indexes [I ≥ 2σ (I)]                | R <sub>1</sub> = 0.0476, wR <sub>2</sub> = 0.1259             |
| Final R indexes [all data]                  | R <sub>1</sub> = 0.0503, wR <sub>2</sub> = 0.1277             |
| Largest diff. peak/hole / e Å <sup>-3</sup> | 0.49/-0.21                                                    |

## X-ray crystal structure of 30a

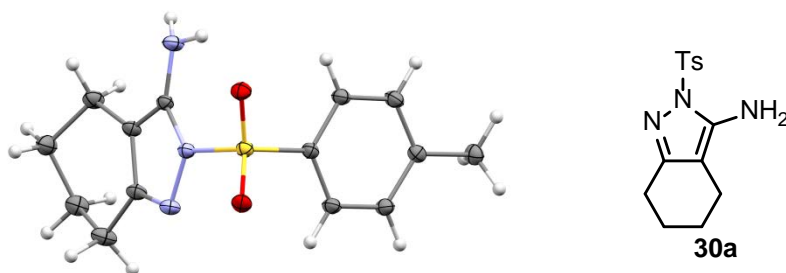

|                                             |                                                                 |
|---------------------------------------------|-----------------------------------------------------------------|
| Empirical formula                           | C <sub>14</sub> H <sub>17</sub> N <sub>3</sub> O <sub>2</sub> S |
| Formula weight                              | 291.36                                                          |
| Temperature/K                               | 100                                                             |
| Crystal system                              | monoclinic                                                      |
| Space group                                 | P2 <sub>1</sub> /c                                              |
| a/Å                                         | 13.7293(12)                                                     |
| b/Å                                         | 8.4475(6)                                                       |
| c/Å                                         | 12.0428(9)                                                      |
| α/°                                         | 90                                                              |
| β/°                                         | 100.898(4)                                                      |
| γ/°                                         | 90                                                              |
| Volume/Å <sup>3</sup>                       | 1371.51(19)                                                     |
| Z                                           | 4                                                               |
| ρ <sub>calc</sub> /cm <sup>3</sup>          | 1.411                                                           |
| μ/mm <sup>-1</sup>                          | 0.241                                                           |
| F(000)                                      | 616.0                                                           |
| Crystal size/mm <sup>3</sup>                | 0.45 × 0.316 × 0.214                                            |
| Radiation                                   | MoKα (λ = 0.71073)                                              |
| 2θ range for data collection/°              | 5.692 to 63.138                                                 |
| Index ranges                                | -16 ≤ h ≤ 20, -12 ≤ k ≤ 12, -17 ≤ l ≤ 17                        |
| Reflections collected                       | 18342                                                           |
| Independent reflections                     | 4579 [R <sub>int</sub> = 0.0280, R <sub>sigma</sub> = 0.0257]   |
| Data/restraints/parameters                  | 4579/0/209                                                      |
| Goodness-of-fit on F <sup>2</sup>           | 1.032                                                           |
| Final R indexes [I ≥ 2σ (I)]                | R <sub>1</sub> = 0.0363, wR <sub>2</sub> = 0.1021               |
| Final R indexes [all data]                  | R <sub>1</sub> = 0.0398, wR <sub>2</sub> = 0.1052               |
| Largest diff. peak/hole / e Å <sup>-3</sup> | 0.83/-0.62                                                      |

## X-ray crystal structure of 40

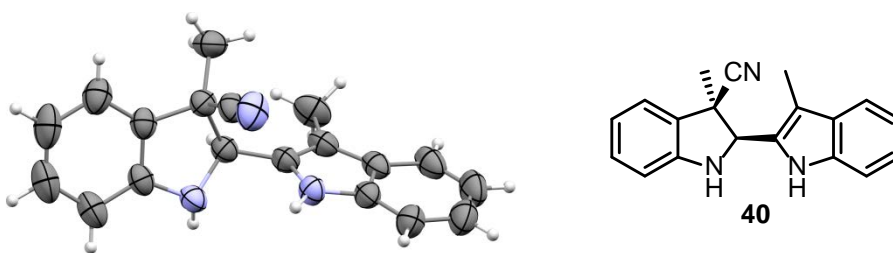

|                                             |                                                               |
|---------------------------------------------|---------------------------------------------------------------|
| Empirical formula                           | C <sub>19</sub> H <sub>17</sub> N <sub>3</sub>                |
| Formula weight                              | 287.35                                                        |
| Temperature/K                               | 298                                                           |
| Crystal system                              | monoclinic                                                    |
| Space group                                 | Cc                                                            |
| a/Å                                         | 10.0946(8)                                                    |
| b/Å                                         | 15.6754(11)                                                   |
| c/Å                                         | 10.9099(11)                                                   |
| α/°                                         | 90                                                            |
| β/°                                         | 113.486(3)                                                    |
| γ/°                                         | 90                                                            |
| Volume/Å <sup>3</sup>                       | 1583.3(2)                                                     |
| Z                                           | 4                                                             |
| ρ <sub>calc</sub> /cm <sup>3</sup>          | 1.205                                                         |
| μ/mm <sup>-1</sup>                          | 0.073                                                         |
| F(000)                                      | 608.0                                                         |
| Crystal size/mm <sup>3</sup>                | 0.363 × 0.286 × 0.166                                         |
| Radiation                                   | MoKα (λ = 0.71073)                                            |
| 2θ range for data collection/°              | 5.33 to 58.25                                                 |
| Index ranges                                | -13 ≤ h ≤ 13, -21 ≤ k ≤ 21, -14 ≤ l ≤ 14                      |
| Reflections collected                       | 19130                                                         |
| Independent reflections                     | 4229 [R <sub>int</sub> = 0.0210, R <sub>sigma</sub> = 0.0216] |
| Data/restraints/parameters                  | 4229/2/207                                                    |
| Goodness-of-fit on F <sup>2</sup>           | 1.071                                                         |
| Final R indexes [I ≥ 2σ (I)]                | R <sub>1</sub> = 0.0386, wR <sub>2</sub> = 0.1132             |
| Final R indexes [all data]                  | R <sub>1</sub> = 0.0398, wR <sub>2</sub> = 0.1147             |
| Largest diff. peak/hole / e Å <sup>-3</sup> | 0.18/-0.15                                                    |
| Flack parameter                             | -0.1(4)                                                       |

## X-ray crystal structure of 41

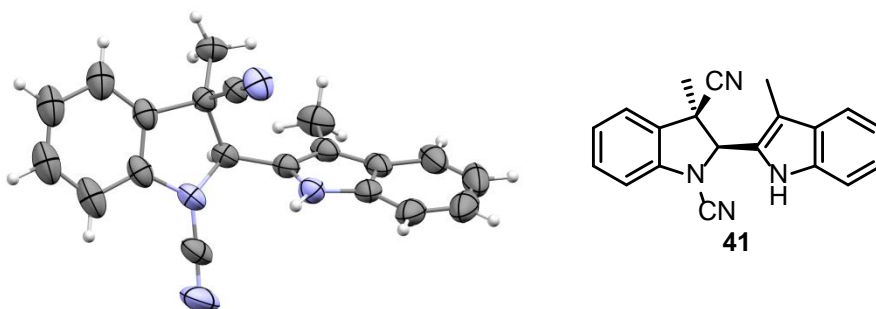

|                                             |                                                               |
|---------------------------------------------|---------------------------------------------------------------|
| Empirical formula                           | C <sub>20</sub> H <sub>16</sub> N <sub>4</sub>                |
| Formula weight                              | 312.37                                                        |
| Temperature/K                               | 298                                                           |
| Crystal system                              | orthorhombic                                                  |
| Space group                                 | Pna2 <sub>1</sub>                                             |
| a/Å                                         | 6.7642(4)                                                     |
| b/Å                                         | 25.5858(14)                                                   |
| c/Å                                         | 9.4556(5)                                                     |
| α/°                                         | 90                                                            |
| β/°                                         | 90                                                            |
| γ/°                                         | 90                                                            |
| Volume/Å <sup>3</sup>                       | 1636.46(16)                                                   |
| Z                                           | 4                                                             |
| ρ <sub>calc</sub> /cm <sup>3</sup>          | 1.268                                                         |
| μ/mm <sup>-1</sup>                          | 0.078                                                         |
| F(000)                                      | 656.0                                                         |
| Crystal size/mm <sup>3</sup>                | 0.363 × 0.354 × 0.136                                         |
| Radiation                                   | MoKα (λ = 0.71073)                                            |
| 2θ range for data collection/°              | 4.592 to 57.446                                               |
| Index ranges                                | -9 ≤ h ≤ 9, -34 ≤ k ≤ 34, -12 ≤ l ≤ 12                        |
| Reflections collected                       | 44432                                                         |
| Independent reflections                     | 4209 [R <sub>int</sub> = 0.0252, R <sub>sigma</sub> = 0.0174] |
| Data/restraints/parameters                  | 4209/38/222                                                   |
| Goodness-of-fit on F <sup>2</sup>           | 1.062                                                         |
| Final R indexes [I ≥ 2σ (I)]                | R <sub>1</sub> = 0.0377, wR <sub>2</sub> = 0.1114             |
| Final R indexes [all data]                  | R <sub>1</sub> = 0.0389, wR <sub>2</sub> = 0.1127             |
| Largest diff. peak/hole / e Å <sup>-3</sup> | 0.21/-0.20                                                    |
| Flack parameter                             | 0.0(3)                                                        |

## X-ray crystal structure of 43

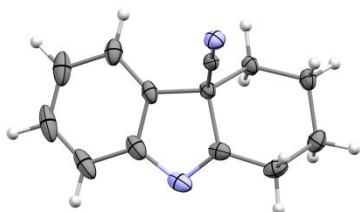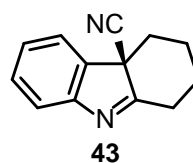

|                                             |                                                               |
|---------------------------------------------|---------------------------------------------------------------|
| Empirical formula                           | C <sub>13</sub> H <sub>12</sub> N <sub>2</sub>                |
| Formula weight                              | 196.25                                                        |
| Temperature/K                               | 100.01                                                        |
| Crystal system                              | monoclinic                                                    |
| Space group                                 | P2 <sub>1</sub> /c                                            |
| a/Å                                         | 6.7185(13)                                                    |
| b/Å                                         | 6.7629(15)                                                    |
| c/Å                                         | 23.087(4)                                                     |
| α/°                                         | 90                                                            |
| β/°                                         | 90.519(7)                                                     |
| γ/°                                         | 90                                                            |
| Volume/Å <sup>3</sup>                       | 1048.9(4)                                                     |
| Z                                           | 4                                                             |
| ρ <sub>calc</sub> /cm <sup>3</sup>          | 1.243                                                         |
| μ/mm <sup>-1</sup>                          | 0.075                                                         |
| F(000)                                      | 416.0                                                         |
| Crystal size/mm <sup>3</sup>                | 0.5 × 0.406 × 0.088                                           |
| Radiation                                   | MoKα (λ = 0.71073)                                            |
| 2θ range for data collection/°              | 6.064 to 54.348                                               |
| Index ranges                                | -8 ≤ h ≤ 8, -8 ≤ k ≤ 8, -28 ≤ l ≤ 29                          |
| Reflections collected                       | 24225                                                         |
| Independent reflections                     | 2344 [R <sub>int</sub> = 0.0331, R <sub>sigma</sub> = 0.0174] |
| Data/restraints/parameters                  | 2344/0/136                                                    |
| Goodness-of-fit on F <sup>2</sup>           | 1.093                                                         |
| Final R indexes [I ≥ 2σ (I)]                | R <sub>1</sub> = 0.0439, wR <sub>2</sub> = 0.1107             |
| Final R indexes [all data]                  | R <sub>1</sub> = 0.0471, wR <sub>2</sub> = 0.1126             |
| Largest diff. peak/hole / e Å <sup>-3</sup> | 0.24/-0.19                                                    |

## X-ray crystal structure of 48

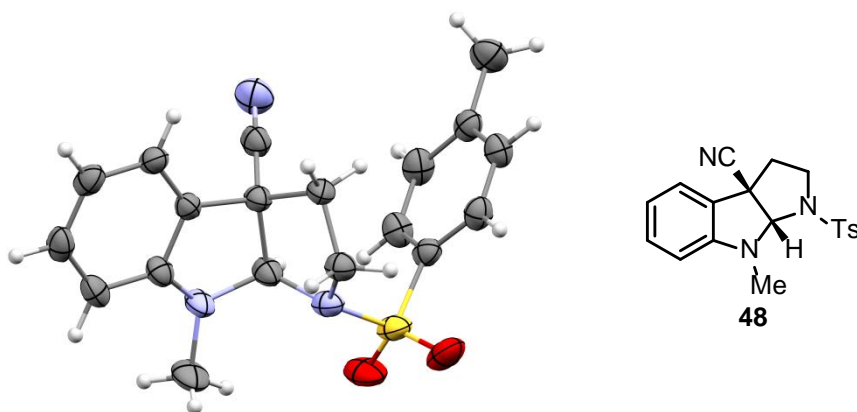

|                                             |                                                                 |
|---------------------------------------------|-----------------------------------------------------------------|
| Empirical formula                           | C <sub>19</sub> H <sub>19</sub> N <sub>3</sub> O <sub>2</sub> S |
| Formula weight                              | 353.43                                                          |
| Temperature/K                               | 199.98                                                          |
| Crystal system                              | monoclinic                                                      |
| Space group                                 | P2 <sub>1</sub> /n                                              |
| a/Å                                         | 11.1603(18)                                                     |
| b/Å                                         | 10.1311(13)                                                     |
| c/Å                                         | 15.642(3)                                                       |
| α/°                                         | 90                                                              |
| β/°                                         | 96.422(8)                                                       |
| γ/°                                         | 90                                                              |
| Volume/Å <sup>3</sup>                       | 1757.5(5)                                                       |
| Z                                           | 4                                                               |
| ρ <sub>calc</sub> /cm <sup>3</sup>          | 1.336                                                           |
| μ/mm <sup>-1</sup>                          | 0.202                                                           |
| F(000)                                      | 744.0                                                           |
| Crystal size/mm <sup>3</sup>                | 0.601 × 0.144 × 0.096                                           |
| Radiation                                   | MoKα (λ = 0.71073)                                              |
| 2θ range for data collection/°              | 5.446 to 57.424                                                 |
| Index ranges                                | -15 ≤ h ≤ 15, -13 ≤ k ≤ 13, -21 ≤ l ≤ 21                        |
| Reflections collected                       | 40943                                                           |
| Independent reflections                     | 4531 [R <sub>int</sub> = 0.0201, R <sub>sigma</sub> = 0.0126]   |
| Data/restraints/parameters                  | 4531/0/232                                                      |
| Goodness-of-fit on F <sup>2</sup>           | 1.041                                                           |
| Final R indexes [I ≥ 2σ (I)]                | R <sub>1</sub> = 0.0377, wR <sub>2</sub> = 0.1064               |
| Final R indexes [all data]                  | R <sub>1</sub> = 0.0404, wR <sub>2</sub> = 0.1091               |
| Largest diff. peak/hole / e Å <sup>-3</sup> | 0.30/-0.42                                                      |

## X-ray crystal structure of 54

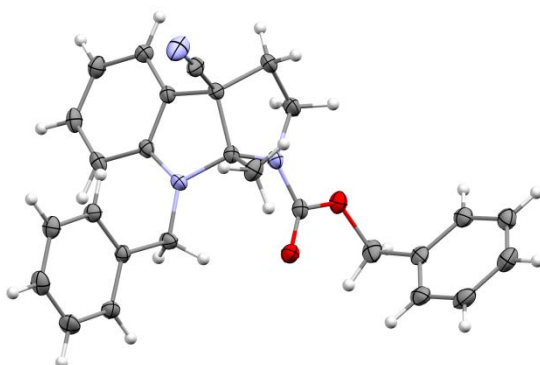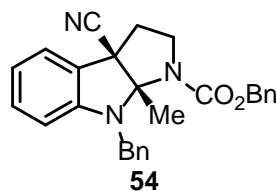

|                                             |                                                               |
|---------------------------------------------|---------------------------------------------------------------|
| Empirical formula                           | C <sub>27</sub> H <sub>25</sub> N <sub>3</sub> O <sub>2</sub> |
| Formula weight                              | 423.50                                                        |
| Temperature/K                               | 99.96                                                         |
| Crystal system                              | monoclinic                                                    |
| Space group                                 | P2 <sub>1</sub> /c                                            |
| a/Å                                         | 18.5268(18)                                                   |
| b/Å                                         | 7.8990(7)                                                     |
| c/Å                                         | 15.0062(15)                                                   |
| α/°                                         | 90                                                            |
| β/°                                         | 90                                                            |
| γ/°                                         | 90                                                            |
| Volume/Å <sup>3</sup>                       | 2196.1(4)                                                     |
| Z                                           | 4                                                             |
| ρ <sub>calc</sub> /cm <sup>3</sup>          | 1.281                                                         |
| μ/mm <sup>-1</sup>                          | 0.082                                                         |
| F(000)                                      | 896.0                                                         |
| Crystal size/mm <sup>3</sup>                | 0.67 × 0.634 × 0.586                                          |
| Radiation                                   | MoKα (λ = 0.71073)                                            |
| 2θ range for data collection/°              | 5.158 to 59.232                                               |
| Index ranges                                | -25 ≤ h ≤ 25, -10 ≤ k ≤ 10, -20 ≤ l ≤ 18                      |
| Reflections collected                       | 33215                                                         |
| Independent reflections                     | 6071 [R <sub>int</sub> = 0.0301, R <sub>sigma</sub> = 0.0244] |
| Data/restraints/parameters                  | 6071/0/291                                                    |
| Goodness-of-fit on F <sup>2</sup>           | 1.035                                                         |
| Final R indexes [I ≥ 2σ (I)]                | R <sub>1</sub> = 0.0399, wR <sub>2</sub> = 0.1039             |
| Final R indexes [all data]                  | R <sub>1</sub> = 0.0417, wR <sub>2</sub> = 0.1065             |
| Largest diff. peak/hole / e Å <sup>-3</sup> | 0.30/-0.22                                                    |



## X-ray crystal structure of 55

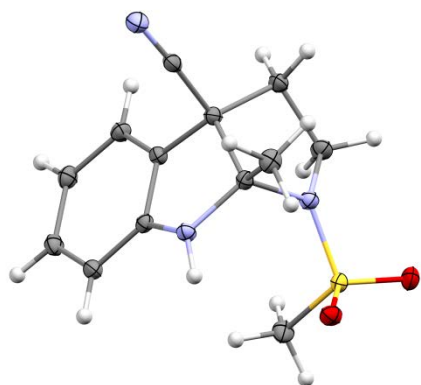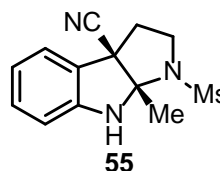

|                                             |                                                                 |
|---------------------------------------------|-----------------------------------------------------------------|
| Empirical formula                           | C <sub>13</sub> H <sub>15</sub> N <sub>3</sub> O <sub>2</sub> S |
| Formula weight                              | 277.34                                                          |
| Temperature/K                               | 100.0                                                           |
| Crystal system                              | monoclinic                                                      |
| Space group                                 | P2 <sub>1</sub> /c                                              |
| a/Å                                         | 13.2046(16)                                                     |
| b/Å                                         | 9.1200(10)                                                      |
| c/Å                                         | 11.4034(15)                                                     |
| α/°                                         | 90                                                              |
| β/°                                         | 110.802(4)                                                      |
| γ/°                                         | 90                                                              |
| Volume/Å <sup>3</sup>                       | 1283.7(3)                                                       |
| Z                                           | 4                                                               |
| ρ <sub>calc</sub> /cm <sup>3</sup>          | 1.435                                                           |
| μ/mm <sup>-1</sup>                          | 0.254                                                           |
| F(000)                                      | 584.0                                                           |
| Crystal size/mm <sup>3</sup>                | 0.936 × 0.364 × 0.08                                            |
| Radiation                                   | MoKα (λ = 0.71073)                                              |
| 2θ range for data collection/°              | 5.554 to 57.434                                                 |
| Index ranges                                | -17 ≤ h ≤ 17, -11 ≤ k ≤ 12, -15 ≤ l ≤ 15                        |
| Reflections collected                       | 13200                                                           |
| Independent reflections                     | 3291 [R <sub>int</sub> = 0.0244, R <sub>sigma</sub> = 0.0217]   |
| Data/restraints/parameters                  | 3291/0/177                                                      |
| Goodness-of-fit on F <sup>2</sup>           | 1.043                                                           |
| Final R indexes [I ≥ 2σ (I)]                | R <sub>1</sub> = 0.0301, wR <sub>2</sub> = 0.0765               |
| Final R indexes [all data]                  | R <sub>1</sub> = 0.0323, wR <sub>2</sub> = 0.0785               |
| Largest diff. peak/hole / e Å <sup>-3</sup> | 0.41/-0.44                                                      |

## X-ray crystal structure of 59

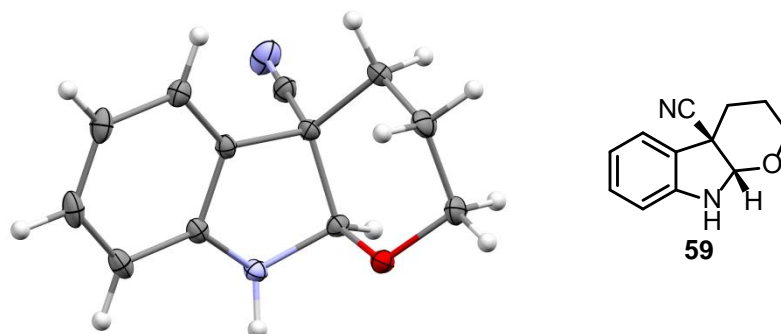

|                                             |                                                               |
|---------------------------------------------|---------------------------------------------------------------|
| Empirical formula                           | C <sub>12</sub> H <sub>12</sub> N <sub>2</sub> O              |
| Formula weight                              | 200.24                                                        |
| Temperature/K                               | 99.98                                                         |
| Crystal system                              | monoclinic                                                    |
| Space group                                 | P2 <sub>1</sub> /c                                            |
| a/Å                                         | 9.9515(8)                                                     |
| b/Å                                         | 7.1269(6)                                                     |
| c/Å                                         | 14.6312(11)                                                   |
| α/°                                         | 90                                                            |
| β/°                                         | 97.573(3)                                                     |
| γ/°                                         | 90                                                            |
| Volume/Å <sup>3</sup>                       | 1028.64(14)                                                   |
| Z                                           | 4                                                             |
| ρ <sub>calc</sub> /cm <sup>3</sup>          | 1.293                                                         |
| μ/mm <sup>-1</sup>                          | 0.084                                                         |
| F(000)                                      | 424.0                                                         |
| Crystal size/mm <sup>3</sup>                | 0.596 × 0.575 × 0.55                                          |
| Radiation                                   | MoKα (λ = 0.71073)                                            |
| 2θ range for data collection/°              | 4.128 to 61.154                                               |
| Index ranges                                | -14 ≤ h ≤ 14, -10 ≤ k ≤ 10, -20 ≤ l ≤ 20                      |
| Reflections collected                       | 31056                                                         |
| Independent reflections                     | 3122 [R <sub>int</sub> = 0.0254, R <sub>sigma</sub> = 0.0119] |
| Data/restraints/parameters                  | 3122/0/140                                                    |
| Goodness-of-fit on F <sup>2</sup>           | 1.087                                                         |
| Final R indexes [I ≥ 2σ (I)]                | R <sub>1</sub> = 0.0362, wR <sub>2</sub> = 0.1008             |
| Final R indexes [all data]                  | R <sub>1</sub> = 0.0375, wR <sub>2</sub> = 0.1032             |
| Largest diff. peak/hole / e Å <sup>-3</sup> | 0.39/-0.24                                                    |

## X-ray crystal structure of 60

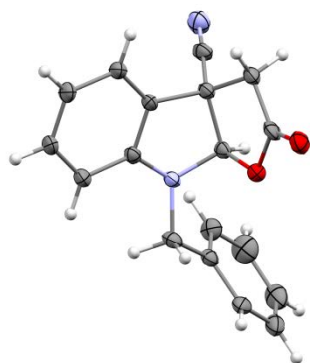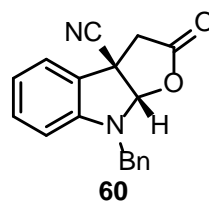

|                                             |                                                               |
|---------------------------------------------|---------------------------------------------------------------|
| Empirical formula                           | C <sub>18</sub> H <sub>14</sub> N <sub>2</sub> O <sub>2</sub> |
| Formula weight                              | 290.31                                                        |
| Temperature/K                               | 100.0                                                         |
| Crystal system                              | triclinic                                                     |
| Space group                                 | P-1                                                           |
| a/Å                                         | 8.3733(5)                                                     |
| b/Å                                         | 8.8124(6)                                                     |
| c/Å                                         | 9.8006(7)                                                     |
| α/°                                         | 92.376(3)                                                     |
| β/°                                         | 94.925(2)                                                     |
| γ/°                                         | 91.733(2)                                                     |
| Volume/Å <sup>3</sup>                       | 719.47(8)                                                     |
| Z                                           | 2                                                             |
| ρ <sub>calc</sub> /cm <sup>3</sup>          | 1.340                                                         |
| μ/mm <sup>-1</sup>                          | 0.089                                                         |
| F(000)                                      | 304.0                                                         |
| Crystal size/mm <sup>3</sup>                | 0.308 × 0.225 × 0.22                                          |
| Radiation                                   | MoKα (λ = 0.71073)                                            |
| 2θ range for data collection/°              | 6.096 to 59.182                                               |
| Index ranges                                | -11 ≤ h ≤ 11, -12 ≤ k ≤ 12, -13 ≤ l ≤ 13                      |
| Reflections collected                       | 18340                                                         |
| Independent reflections                     | 4034 [R <sub>int</sub> = 0.0232, R <sub>sigma</sub> = 0.0213] |
| Data/restraints/parameters                  | 4034/403/374                                                  |
| Goodness-of-fit on F <sup>2</sup>           | 1.191                                                         |
| Final R indexes [I ≥ 2σ (I)]                | R <sub>1</sub> = 0.0555, wR <sub>2</sub> = 0.1200             |
| Final R indexes [all data]                  | R <sub>1</sub> = 0.0572, wR <sub>2</sub> = 0.1207             |
| Largest diff. peak/hole / e Å <sup>-3</sup> | 0.30/-0.26                                                    |

## X-ray crystal structure of 65

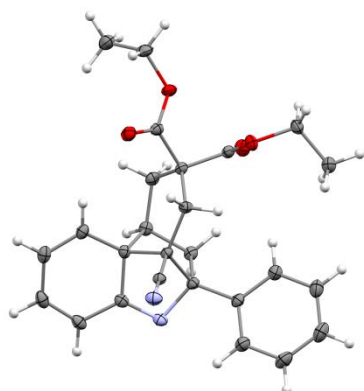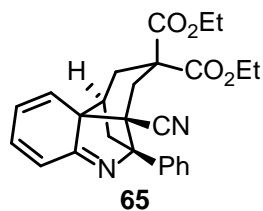

|                                             |                                                               |
|---------------------------------------------|---------------------------------------------------------------|
| Empirical formula                           | C <sub>26</sub> H <sub>26</sub> N <sub>2</sub> O <sub>4</sub> |
| Formula weight                              | 430.49                                                        |
| Temperature/K                               | 100.01                                                        |
| Crystal system                              | monoclinic                                                    |
| Space group                                 | P2 <sub>1</sub> /n                                            |
| a/Å                                         | 10.4697(7)                                                    |
| b/Å                                         | 20.5978(15)                                                   |
| c/Å                                         | 11.0885(7)                                                    |
| α/°                                         | 90                                                            |
| β/°                                         | 116.053(2)                                                    |
| γ/°                                         | 90                                                            |
| Volume/Å <sup>3</sup>                       | 2148.3(3)                                                     |
| Z                                           | 4                                                             |
| ρ <sub>calc</sub> /cm <sup>3</sup>          | 1.331                                                         |
| μ/mm <sup>-1</sup>                          | 0.090                                                         |
| F(000)                                      | 912.0                                                         |
| Crystal size/mm <sup>3</sup>                | 0.496 × 0.446 × 0.198                                         |
| Radiation                                   | MoKα (λ = 0.71073)                                            |
| 2θ range for data collection/°              | 4.76 to 59.232                                                |
| Index ranges                                | -14 ≤ h ≤ 14, -28 ≤ k ≤ 28, -15 ≤ l ≤ 15                      |
| Reflections collected                       | 41436                                                         |
| Independent reflections                     | 5990 [R <sub>int</sub> = 0.0270, R <sub>sigma</sub> = 0.0174] |
| Data/restraints/parameters                  | 5990/0/291                                                    |
| Goodness-of-fit on F <sup>2</sup>           | 1.037                                                         |
| Final R indexes [I ≥ 2σ (I)]                | R <sub>1</sub> = 0.0360, wR <sub>2</sub> = 0.0933             |
| Final R indexes [all data]                  | R <sub>1</sub> = 0.0400, wR <sub>2</sub> = 0.0978             |
| Largest diff. peak/hole / e Å <sup>-3</sup> | 0.40/-0.23                                                    |

## X-ray crystal structure of 69

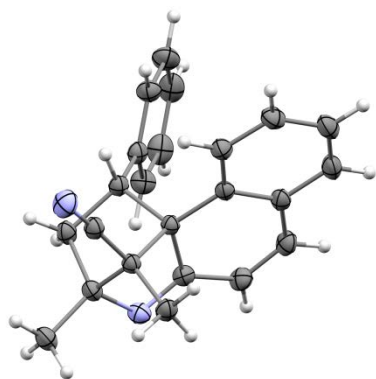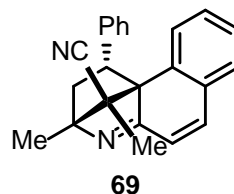

|                                             |                                                               |
|---------------------------------------------|---------------------------------------------------------------|
| Empirical formula                           | C <sub>23</sub> H <sub>20</sub> N <sub>2</sub>                |
| Formula weight                              | 324.41                                                        |
| Temperature/K                               | 175                                                           |
| Crystal system                              | triclinic                                                     |
| Space group                                 | P-1                                                           |
| a/Å                                         | 6.9386(7)                                                     |
| b/Å                                         | 10.8785(10)                                                   |
| c/Å                                         | 12.1498(10)                                                   |
| α/°                                         | 92.955(3)                                                     |
| β/°                                         | 99.134(3)                                                     |
| γ/°                                         | 107.607(3)                                                    |
| Volume/Å <sup>3</sup>                       | 858.20(14)                                                    |
| Z                                           | 2                                                             |
| ρ <sub>calc</sub> /cm <sup>3</sup>          | 1.255                                                         |
| μ/mm <sup>-1</sup>                          | 0.074                                                         |
| F(000)                                      | 344.0                                                         |
| Crystal size/mm <sup>3</sup>                | 0.517 × 0.459 × 0.152                                         |
| Radiation                                   | MoKα (λ = 0.71073)                                            |
| 2θ range for data collection/°              | 6.266 to 57.404                                               |
| Index ranges                                | -9 ≤ h ≤ 9, -14 ≤ k ≤ 14, -16 ≤ l ≤ 16                        |
| Reflections collected                       | 21504                                                         |
| Independent reflections                     | 4423 [R <sub>int</sub> = 0.0220, R <sub>sigma</sub> = 0.0206] |
| Data/restraints/parameters                  | 4423/0/229                                                    |
| Goodness-of-fit on F <sup>2</sup>           | 1.032                                                         |
| Final R indexes [I ≥ 2σ (I)]                | R <sub>1</sub> = 0.0393, wR <sub>2</sub> = 0.1033             |
| Final R indexes [all data]                  | R <sub>1</sub> = 0.0415, wR <sub>2</sub> = 0.1054             |
| Largest diff. peak/hole / e Å <sup>-3</sup> | 0.34/-0.19                                                    |

## X-ray crystal structure of 70-major

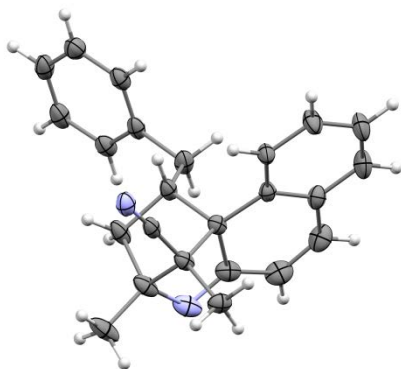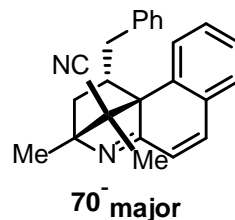

|                                             |                                                               |
|---------------------------------------------|---------------------------------------------------------------|
| Empirical formula                           | C <sub>24</sub> H <sub>22</sub> N <sub>2</sub>                |
| Formula weight                              | 338.43                                                        |
| Temperature/K                               | 99.97                                                         |
| Crystal system                              | orthorhombic                                                  |
| Space group                                 | Pna2 <sub>1</sub>                                             |
| a/Å                                         | 15.504(2)                                                     |
| b/Å                                         | 16.8542(18)                                                   |
| c/Å                                         | 7.0717(9)                                                     |
| α/°                                         | 90                                                            |
| β/°                                         | 90                                                            |
| γ/°                                         | 90                                                            |
| Volume/Å <sup>3</sup>                       | 1847.9(4)                                                     |
| Z                                           | 4                                                             |
| ρ <sub>calc</sub> /cm <sup>3</sup>          | 1.217                                                         |
| μ/mm <sup>-1</sup>                          | 0.071                                                         |
| F(000)                                      | 720.0                                                         |
| Crystal size/mm <sup>3</sup>                | 0.27 × 0.236 × 0.182                                          |
| Radiation                                   | MoKα (λ = 0.71073)                                            |
| 2θ range for data collection/°              | 5.254 to 57.502                                               |
| Index ranges                                | -20 ≤ h ≤ 20, -22 ≤ k ≤ 22, -9 ≤ l ≤ 9                        |
| Reflections collected                       | 41884                                                         |
| Independent reflections                     | 4791 [R <sub>int</sub> = 0.0313, R <sub>sigma</sub> = 0.0184] |
| Data/restraints/parameters                  | 4791/1/237                                                    |
| Goodness-of-fit on F <sup>2</sup>           | 1.065                                                         |
| Final R indexes [I ≥ 2σ (I)]                | R <sub>1</sub> = 0.0343, wR <sub>2</sub> = 0.0922             |
| Final R indexes [all data]                  | R <sub>1</sub> = 0.0352, wR <sub>2</sub> = 0.0932             |
| Largest diff. peak/hole / e Å <sup>-3</sup> | 0.33/-0.20                                                    |
| Flack parameter                             | -0.2(5)                                                       |

## 10. References

- [1] B. Waldecker, F. Kraft, C. Golz, M. Alcarazo, *Angew. Chem. Int. Ed.* **2018**, *57*, 12538-12542.
- [2] R. R. Singh, R.-S. Liu, *Chem. Commun.* **2017**, *53*, 4593-4596.
- [3] X.-H. Xu, G.-K. Liu, A. Azuma, E. Tokunaga, N. Shibata, *Org. Lett.* **2011**, *13*, 4854-4857.
- [4] D. L. Priebbenow, L. C. Henderson, F. M. Pfeffer, S. G. Stewart, *J. Org. Chem.* **2010**, *75*, 1787-1790.
- [5] T. D. Montgomery, A. E. Nibbs, Y. Zhu, V. H. Rawal, *Org. Lett.* **2014**, *16*, 3480-3483.
- [6] N. Zheng, Y.-Y. Chang, L.-J. Zhang, J.-X. Gong, Z. Yang, *Chem. Asian J.* **2016**, *11*, 371-375.
- [7] Y. Peng, L. Luo, C.-S. Yan, J.-J. Zhang, Y.-W. Wang, *J. Org. Chem.* **2013**, *78*, 10960-10967.
- [8] E. C. Gentry, L. J. Rono, M. E. Hale, R. Matsuura, R. R. Knowles, *J. Am. Chem. Soc.* **2018**, *140*, 3394-3402.
- [9] X.-W. Liang, C. Liu, W. Zhang, S.-L. You, *Chem. Commun.* **2017**, *53*, 5531-5534.
- [10] C. Liu, W. Zhang, L.-X. Dai, S.-L. You, *Org. Lett.* **2012**, *14*, 4525-4527.
- [11] K. R. Campos, J. C. S. Woo, S. Lee, R. D. Tillyer, *Org. Lett.* **2004**, *6*, 79-82.
- [12] R.-D. Gao, C. Liu, L.-X. Dai, W. Zhang, S.-L. You, *Org. Lett.* **2014**, *16*, 3919-3921.
- [13] M. Zhu, K. Zhou, X. Zhang, S.-L. You, *Org. Lett.* **2018**, *20*, 4379-4383.
- [14] G. E. Rudebusch, L. N. Zakharov, S.-Y. Liu, *Angew. Chem. Int. Ed.* **2013**, *52*, 9316 – 9319.
- [15] S.-G. Li, S. Z. Zard, *Org. Lett.* **2013**, *15*, 5898-5901.
- [16] D. T. Jones, G. D. Artman, R. M. Williams, *Tetrahedron Lett.* **2007**, *48*, 1291-1294.
- [17] G. Cera, P. Crispino, M. Monari, M. Bandini, *Chem. Commun.* **2011**, *47*, 7803-7805.
- [18] Z. Pan, S. Wang, J. T. Brethorst, C. J. Douglas, *J. Am. Chem. Soc.* **2018**, *140*, 3331–3338.
- [19] K. Skoch, I. Cisarova, and P. Stepnicka, *Chem. Eur. J.* **2018**, *24*, 13788 – 13791.
- [20] J. Li, X. Zheng, W. Li, W. Zhou, W. Zhu, Y. Zhang, *New J. Chem.* **2016**, *40*, 77-80.
- [21] Y.-Q. Wu, D. C. Limburg, D. E. Wilkinson, G. S. Hamilton, *Org. Lett.* **2000**, *2*, 795-797.
- [22] J. N. Ayres, M. W. Ashford, Y. Stöckl, V. Prudhomme, K. B. Ling, J. A. Platts, L. C.

- Morrill, *Org. Lett.* **2017**, *19*, 3835–3838.
- [23] G. Talavera, J. Pena, and M. Alcarazo, *J. Am. Chem. Soc.* **2015**, *137*, 8704–8707.
- [24] W. Guo, W. Tan, M. Zhao, L. Zheng, K. Tao, D. Chen, X. Fan, *J. Org. Chem.* **2018**, *83*, 6580–6588.
- [25] R. Frei, T. Courant, M. D. Wodrich, J. Waser, *Chem. Eur. J.* **2015**, *21*, 2662 – 2668.
- [26] A. Khazaei, A. Alizadeh, R. G. Vaghei, *Molecules*, **2001**, *6*, 253-257.
- [27] T. Nagata, H. Matsubara, K. Kiyokawa, S. Minakata, *Org. Lett.* **2017**, *19*, 4672–4675.
- [28] X. Wang, A. Studer, *Angew. Chem. Int. Ed.* **2018**, *57*, 11792 –11796.
- [29] S. Xu, X. Huang, X. Hong, B. Xu, *Org. Lett.* **2012**, *14*, 4614–4617.
- [30] Q. Wu, Y. Luo, A. Lei, J. You, *J. Am. Chem. Soc.* **2016**, *138*, 2885–2888.
- [31] L. Zhang, P. Lu, Y. Wang, *Org. Biomol. Chem.* **2015**, *13*, 8322–8329.
- [32] J. T. Reeves, C. A. Malapit, F. G. Buono, K. P. Sidhu, M. A. Marsini, C. A. Sader, K. R. Fandrick, C. A. Busacca, C. H. Senanayake, *J. Am. Chem. Soc.* **2015**, *137*, 9481–9488.
- [33] S. B. Mane, C.-F. Cheng, A. A. Sutanto, A. Datta, A. Dutta, C.-H. Hung, *Tetrahedron* **2015**, *71*, 7977-7984.



## 11. NMR spectra

### $^1\text{H}$ NMR (300 MHz, $\text{CD}_3\text{CN}$ )

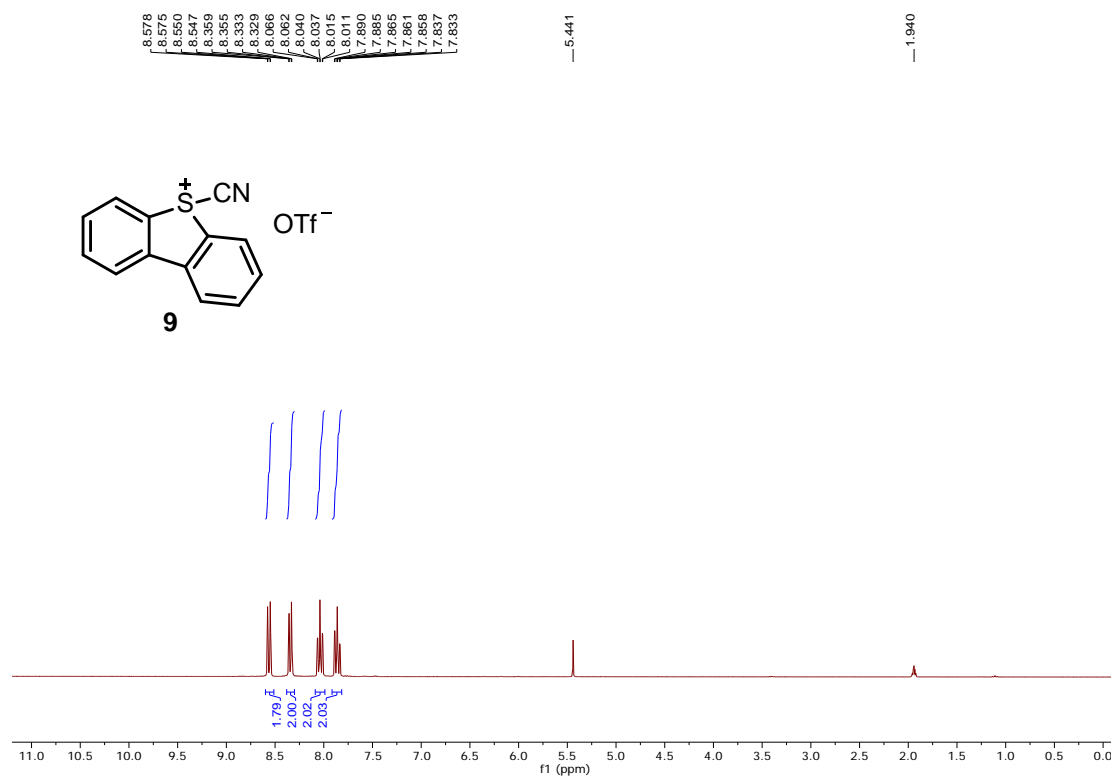

### $^{13}\text{C}$ NMR (75 MHz, $\text{CD}_3\text{CN}$ )

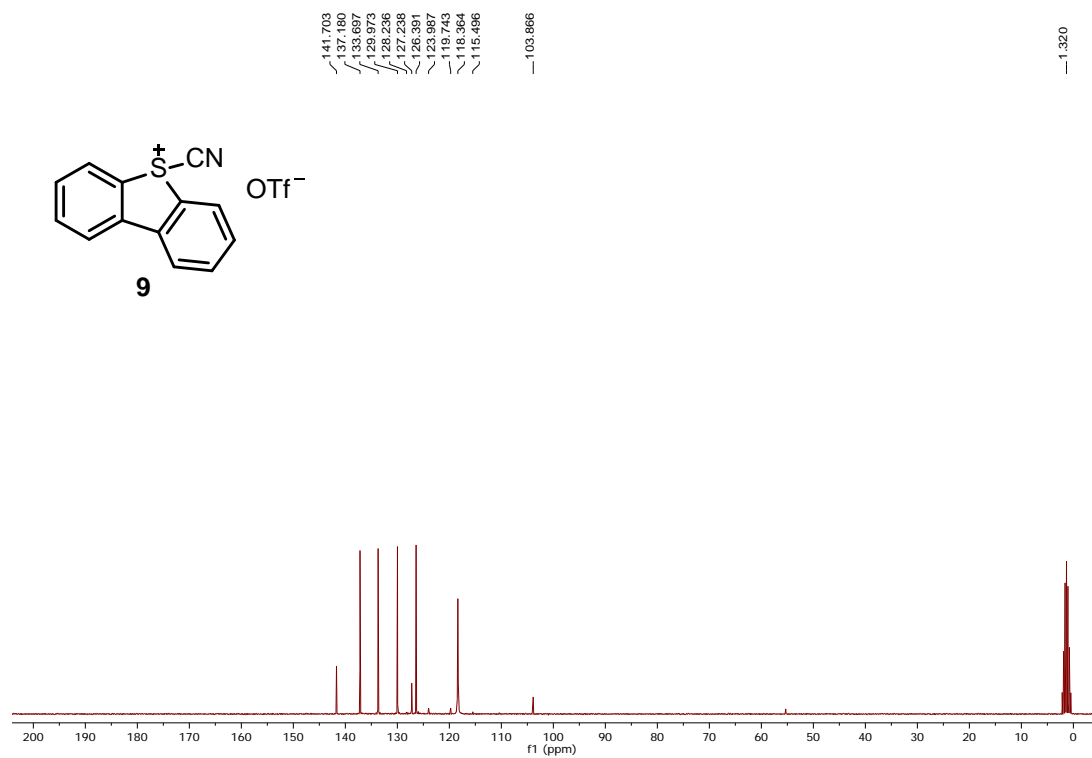

# <sup>1</sup>H NMR (400 MHz, DMSO-d<sub>6</sub>, 100 °C)

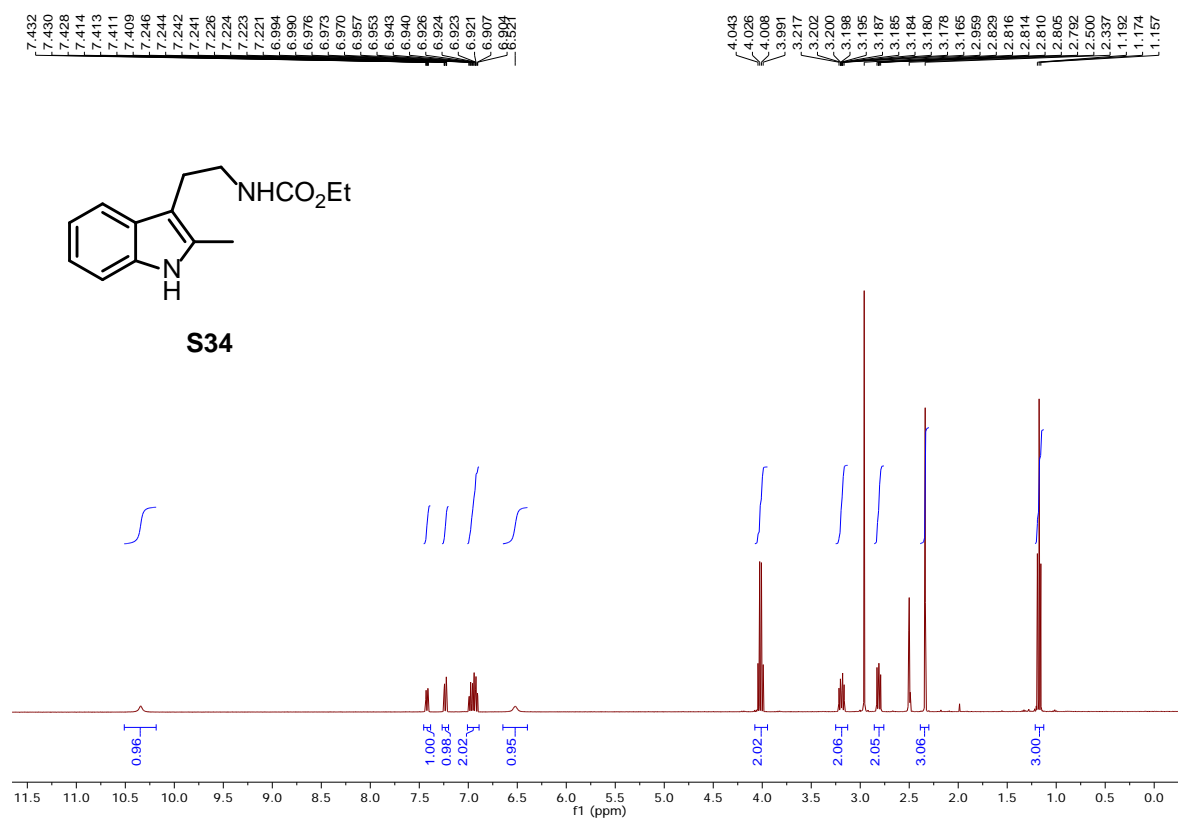

# <sup>13</sup>C NMR (101 MHz, DMSO-d<sub>6</sub>, 100 °C)

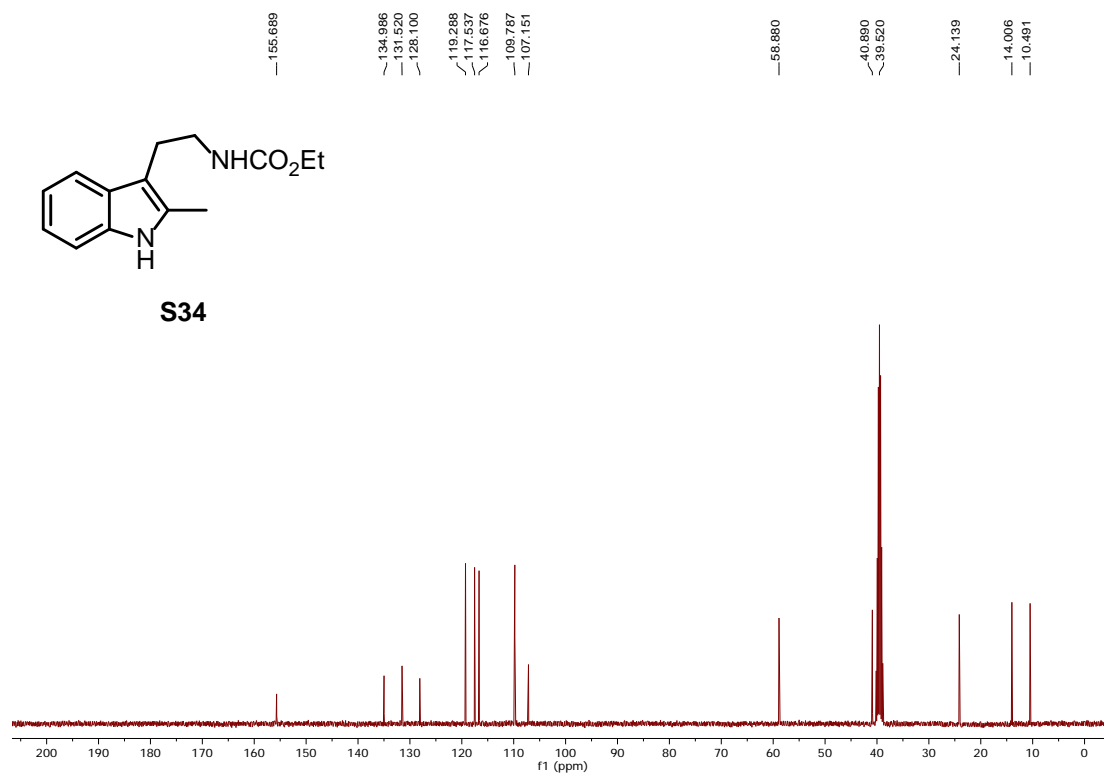

# <sup>1</sup>H NMR (400 MHz, DMSO-d<sub>6</sub>, 100 °C)

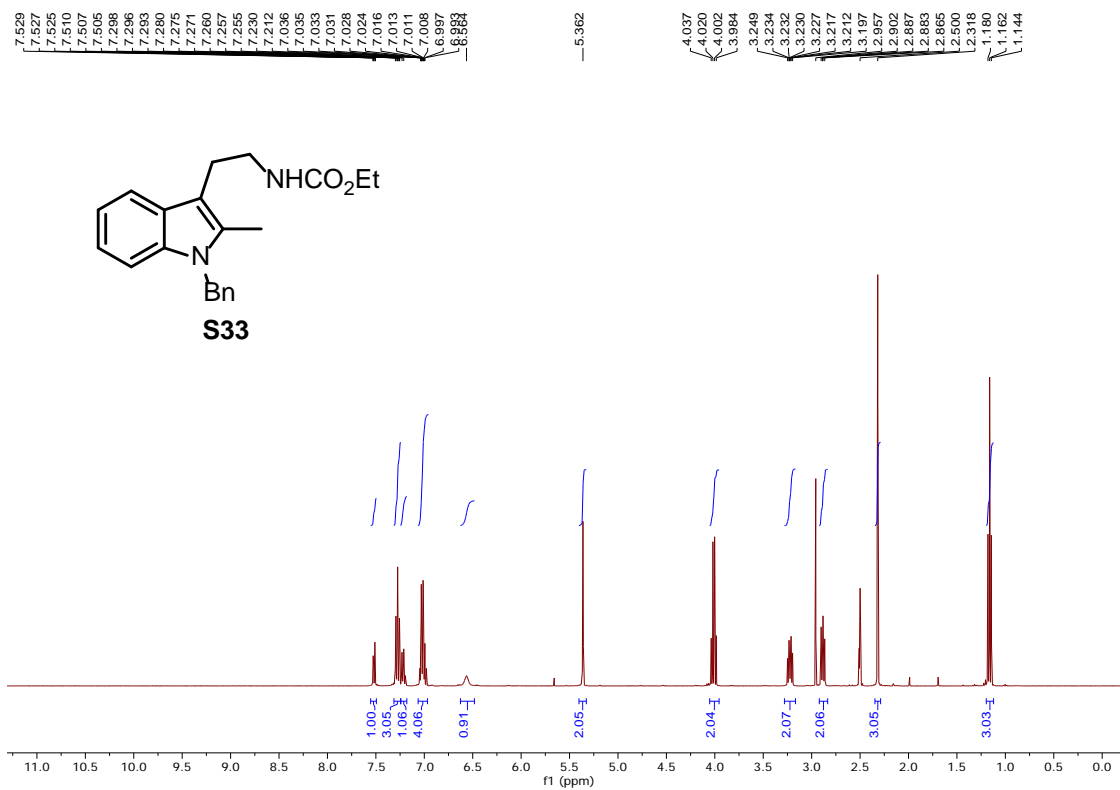

**<sup>13</sup>C NMR (101 MHz, DMSO-*d*<sub>6</sub>, 100 °C)**

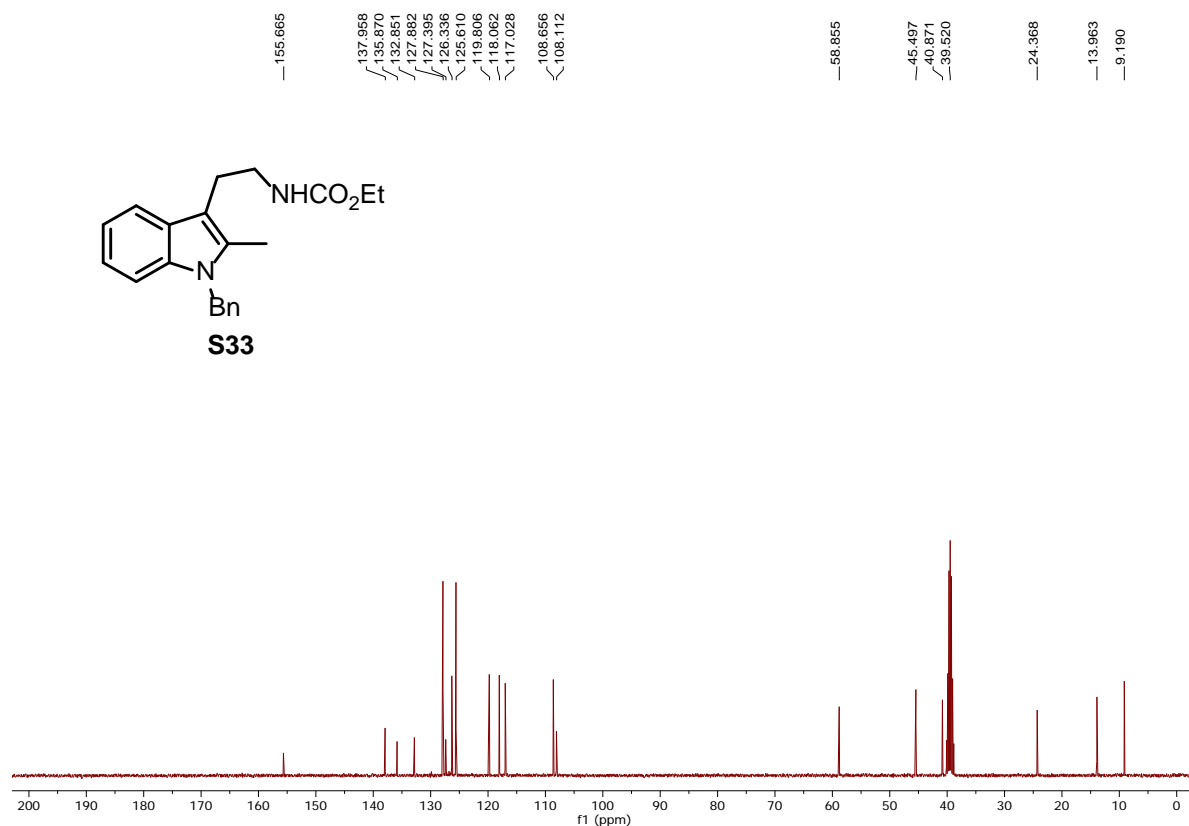

**<sup>1</sup>H NMR (400 MHz, DMSO-*d*<sub>6</sub>, 100 °C)**

7.522  
7.520  
7.519  
7.516  
7.510  
7.502  
7.499  
7.498  
7.354  
7.352  
7.351  
7.348  
7.346  
7.342  
7.340  
7.339  
7.300  
7.288  
7.287  
7.281  
7.251  
7.250  
7.249  
7.226  
7.208  
7.190  
7.152  
7.052  
7.034  
7.032  
7.030  
7.028  
7.026  
7.025  
7.023  
7.017  
7.015  
7.013  
7.011  
7.009  
7.008  
7.005  
7.005  
6.990  
6.987  
6.972  
6.969  
6.969  
5.049  
5.047  
3.291  
3.276  
3.274  
3.272  
3.269  
3.261  
3.258  
3.256  
3.254  
3.253  
3.223  
2.909  
2.907  
2.903  
2.886  
2.500  
2.300

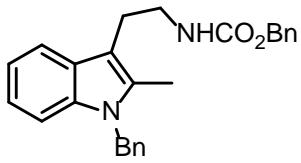

**S37**

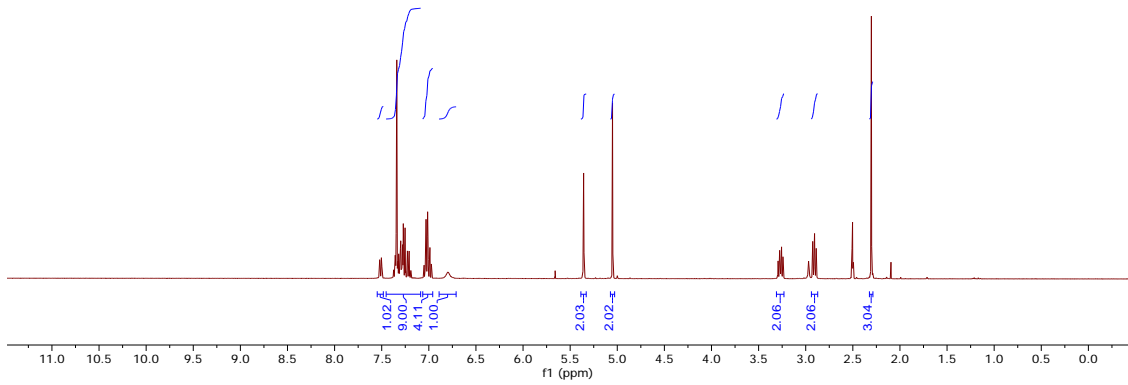

**<sup>13</sup>C NMR (101 MHz, DMSO-*d*<sub>6</sub>, 100 °C)**

155.513  
137.936  
136.860  
135.873  
132.877  
127.879  
127.631  
127.382  
126.976  
126.937  
126.329  
125.598  
119.813  
118.086  
117.029  
108.658  
108.055  
64.738  
45.500  
41.000  
40.146  
39.937  
39.731  
39.708  
39.521  
39.497  
39.314  
39.293  
39.102  
38.893  
24.361  
9.182

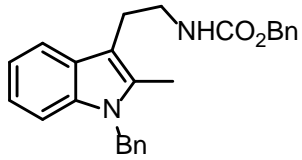

**S37**

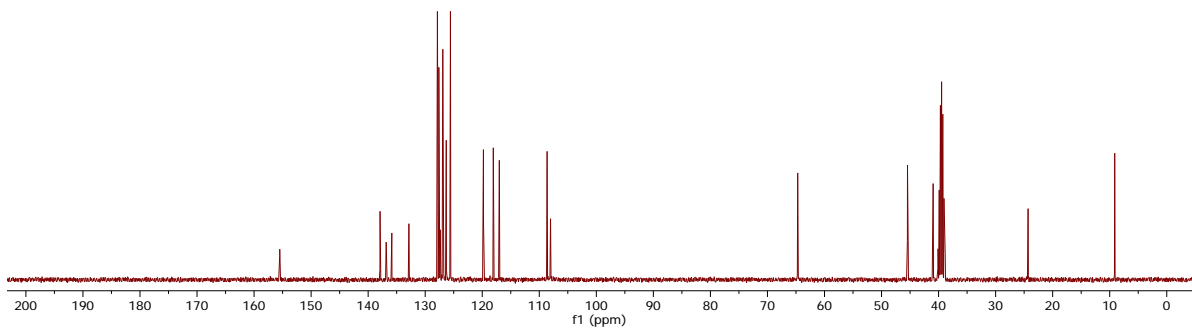

# <sup>1</sup>H NMR (400 MHz, Chloroform-*d*)

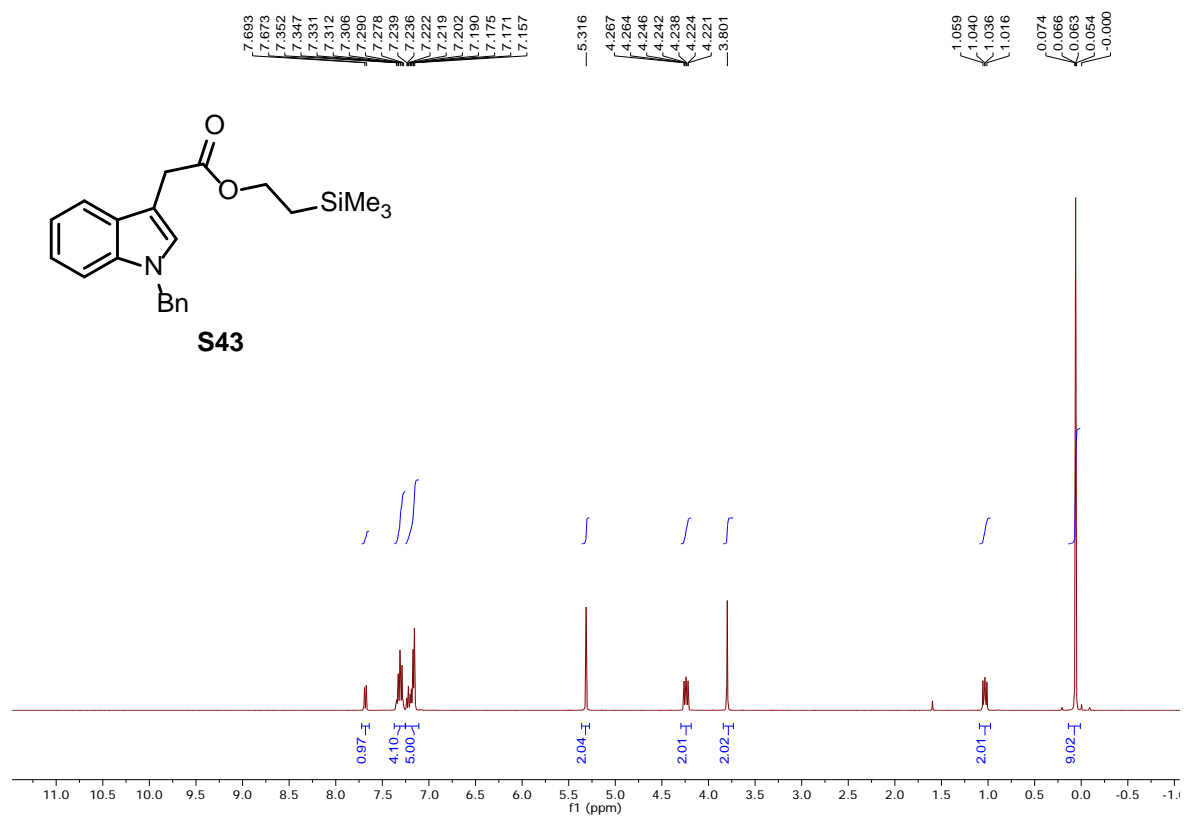

# <sup>13</sup>C NMR (101 MHz, Chloroform-*d*)

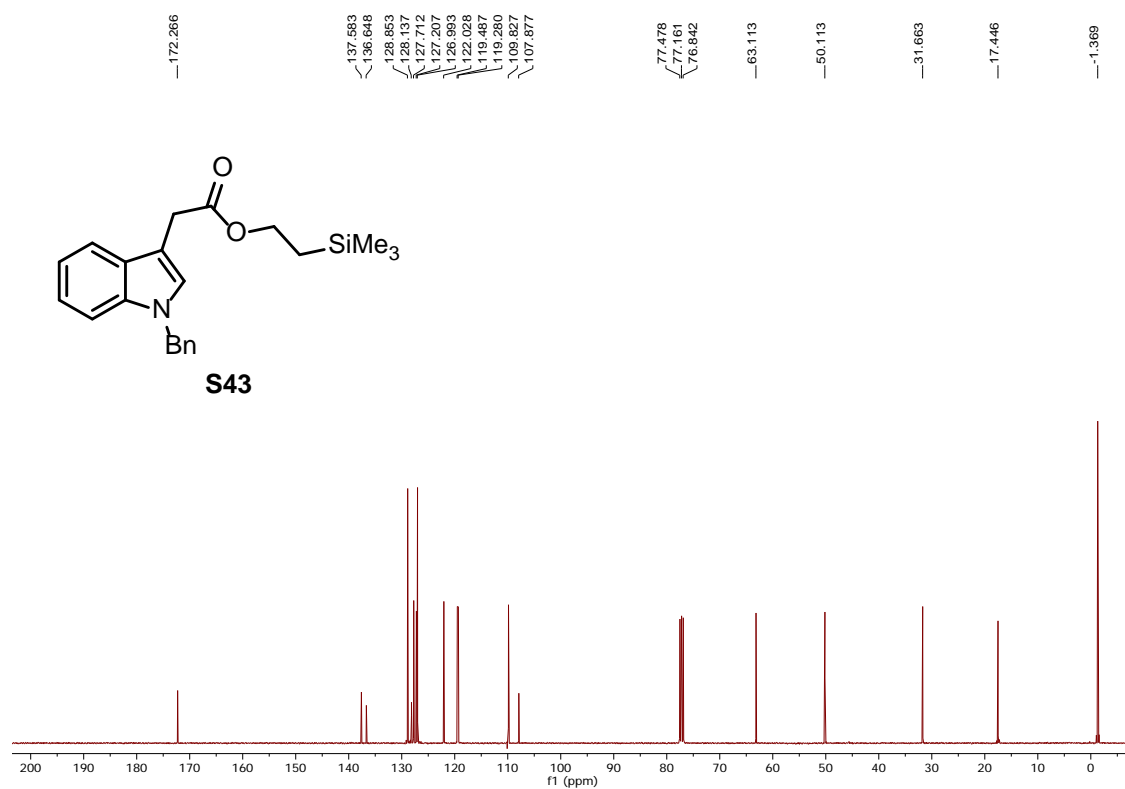

# <sup>1</sup>H NMR (400 MHz, Chloroform-d)

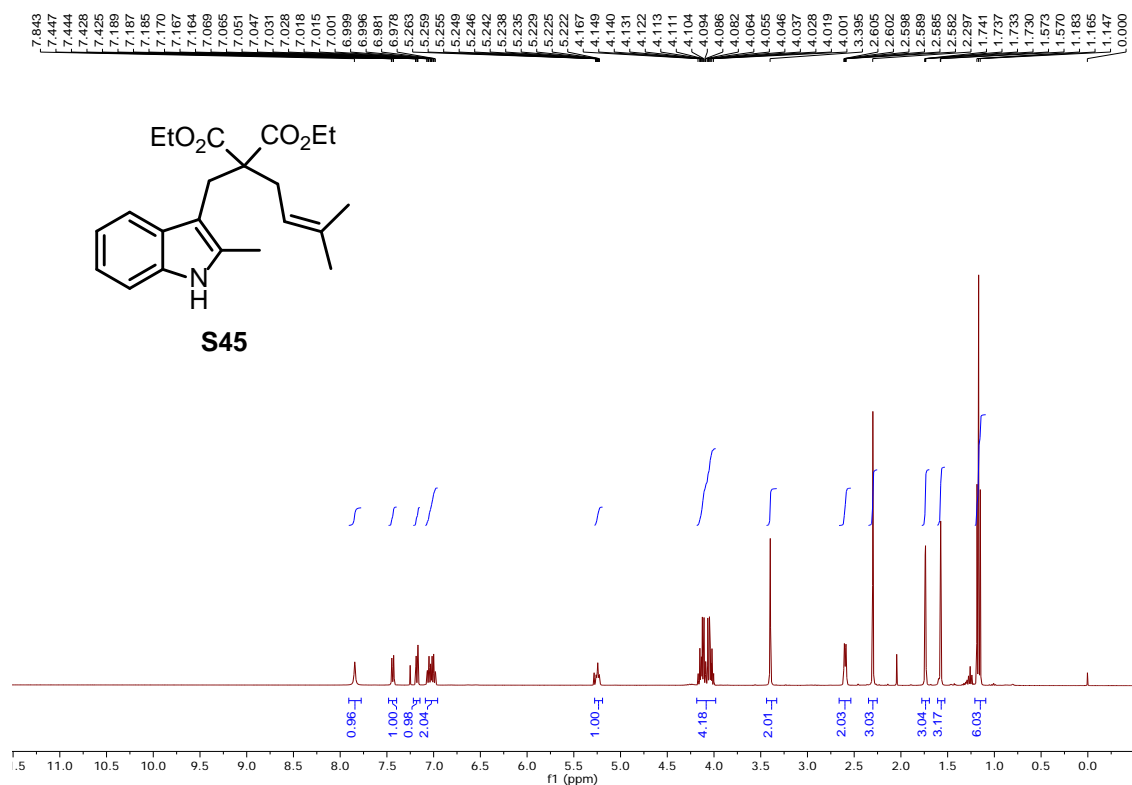

# <sup>13</sup>C NMR (101 MHz, Chloroform-d)

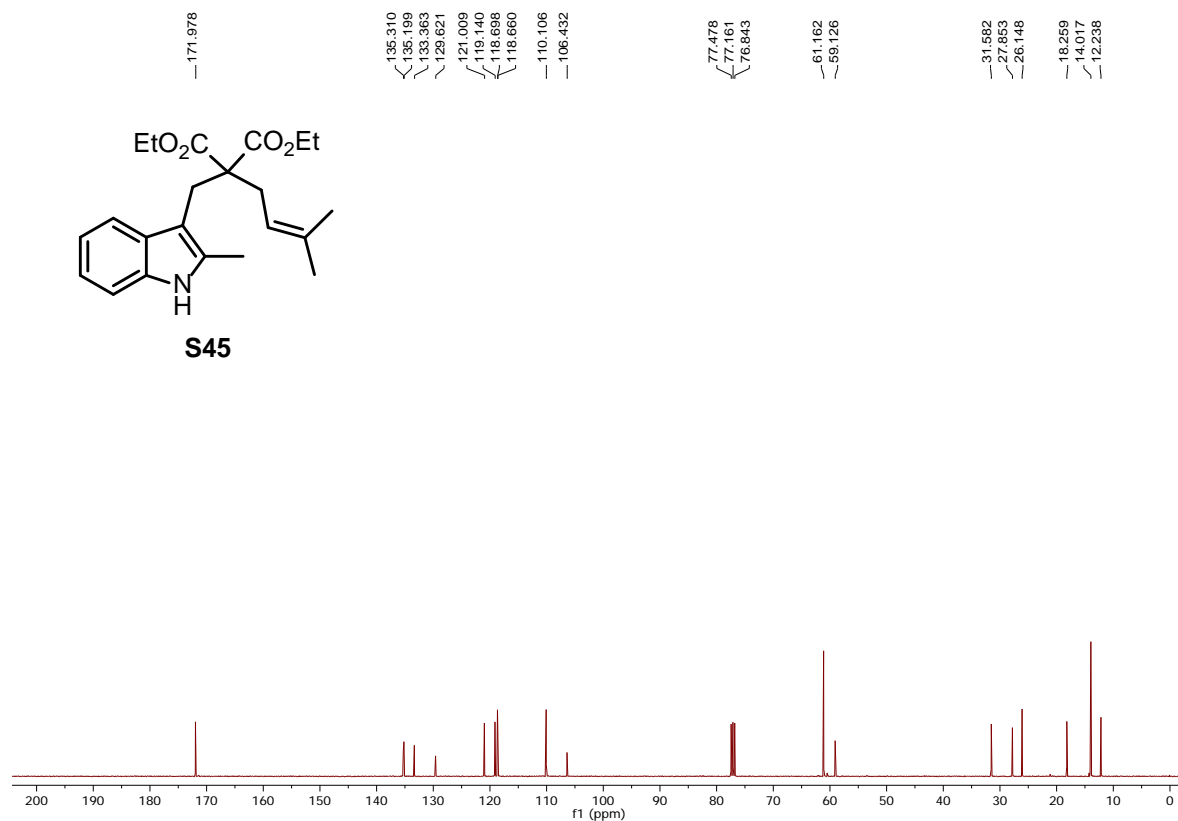

# <sup>1</sup>H NMR (400 MHz, Chloroform-d)

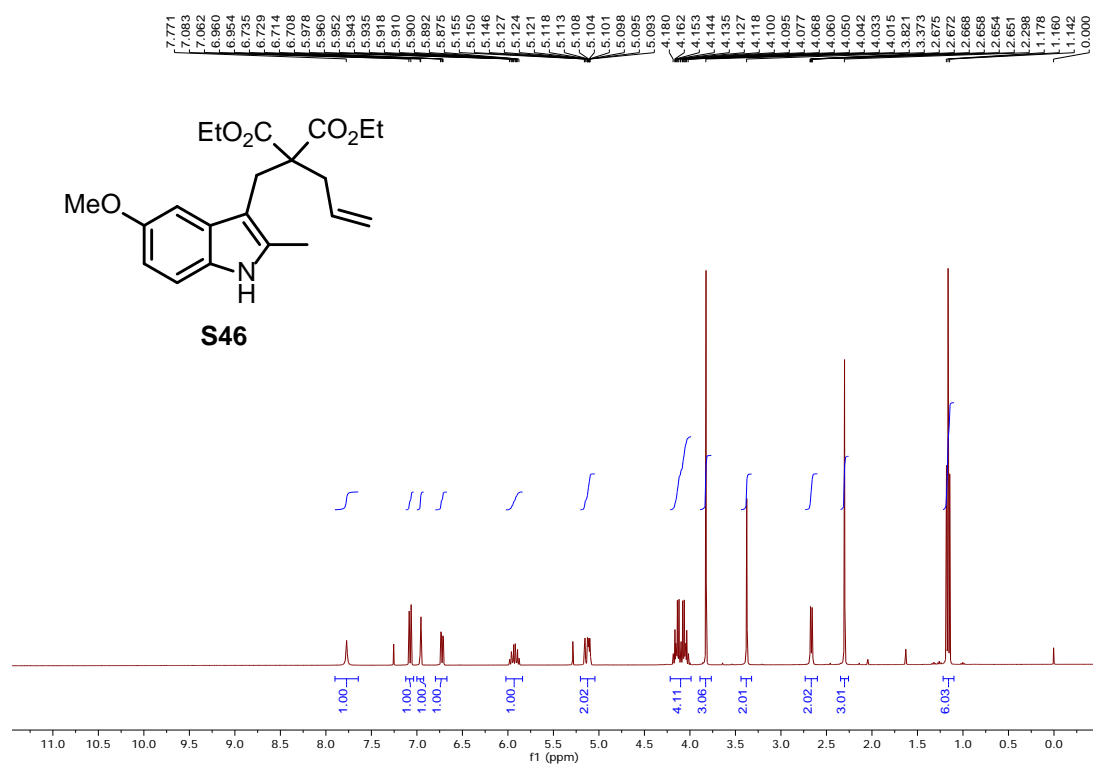

# <sup>13</sup>C NMR (101 MHz, Chloroform-d)

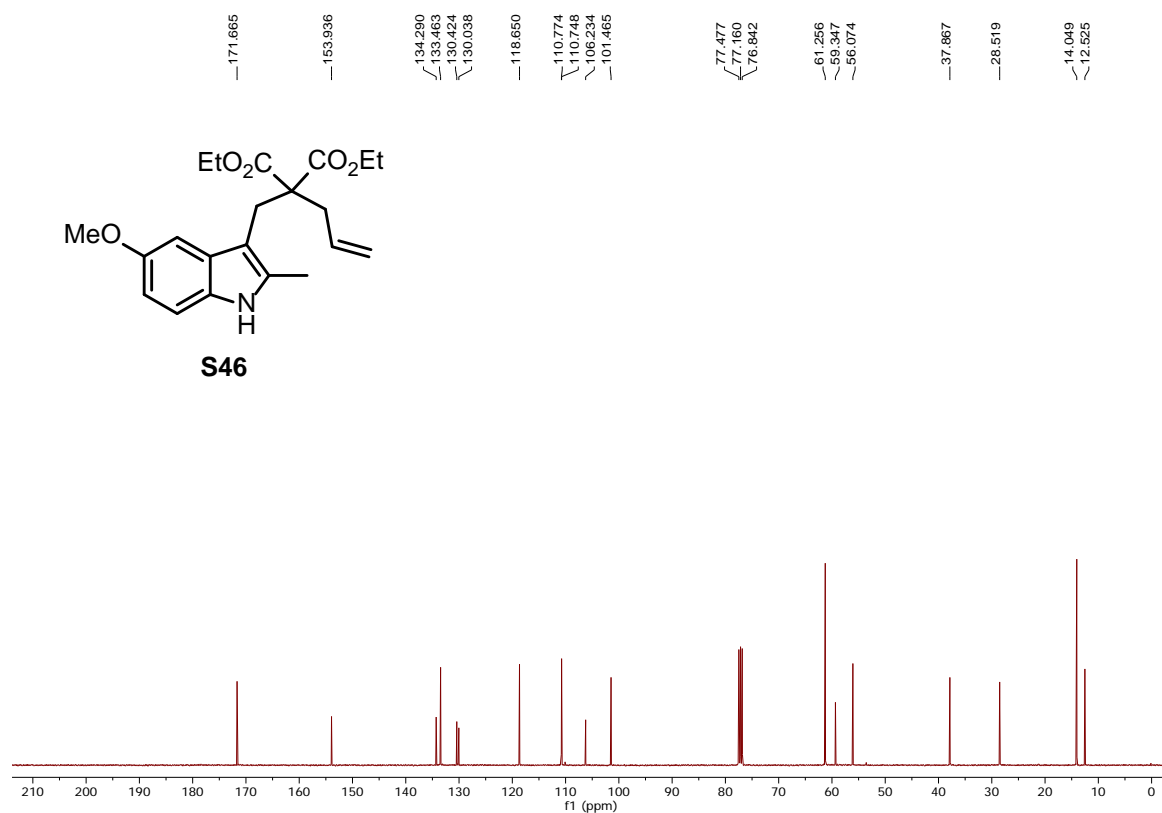

# <sup>1</sup>H NMR (400 MHz, Chloroform-*d*)

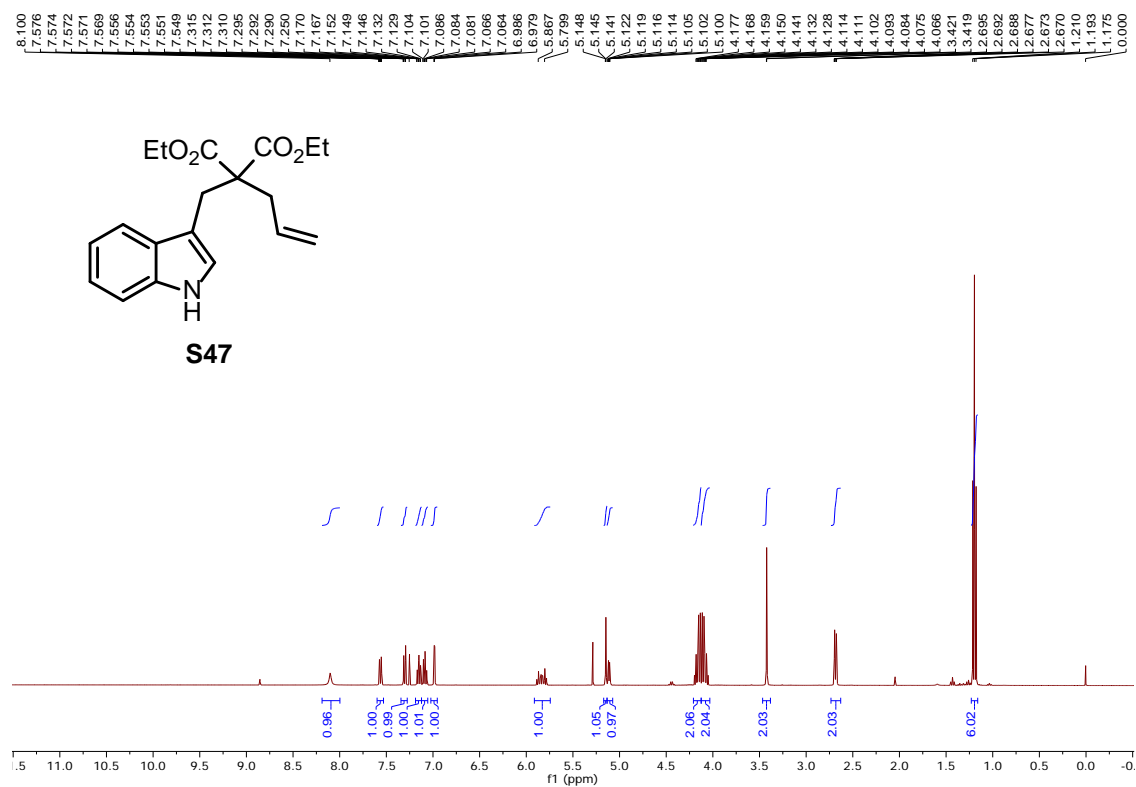

# <sup>13</sup>C NMR (101 MHz, Chloroform-*d*)

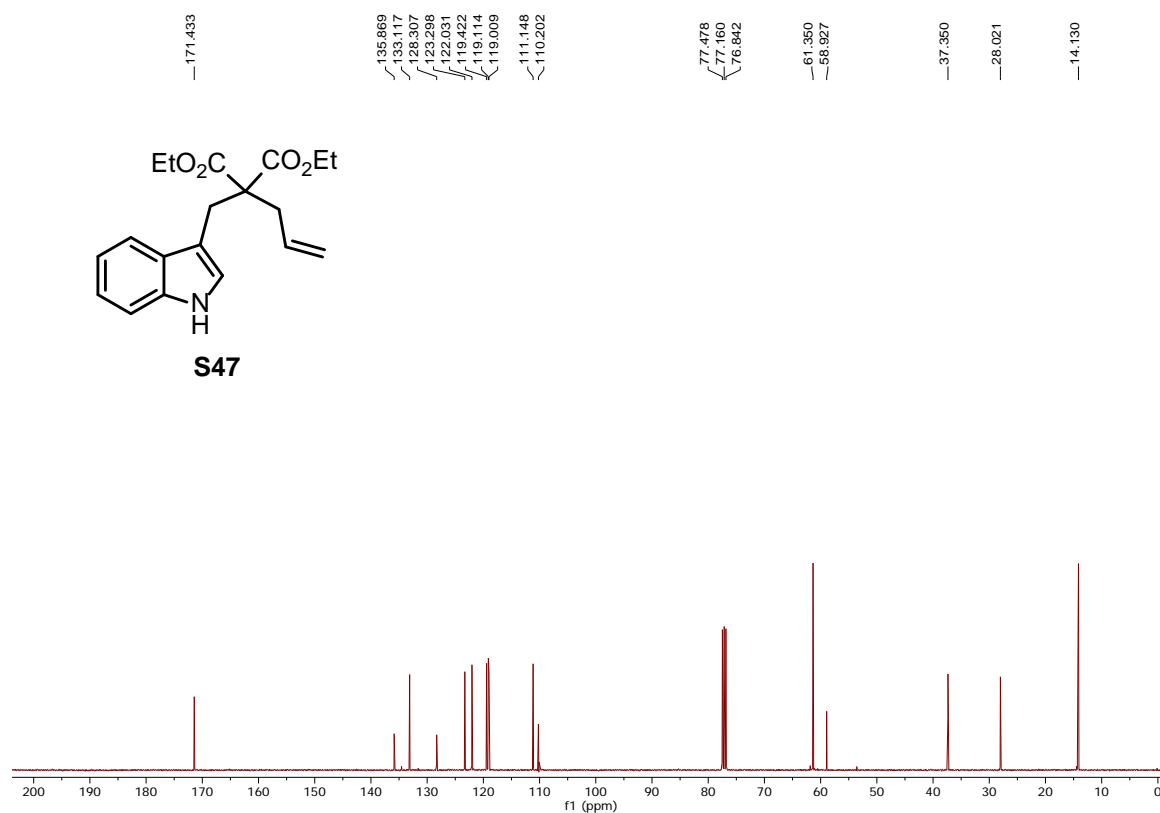



# <sup>1</sup>H NMR (400 MHz, Chloroform-*d*)

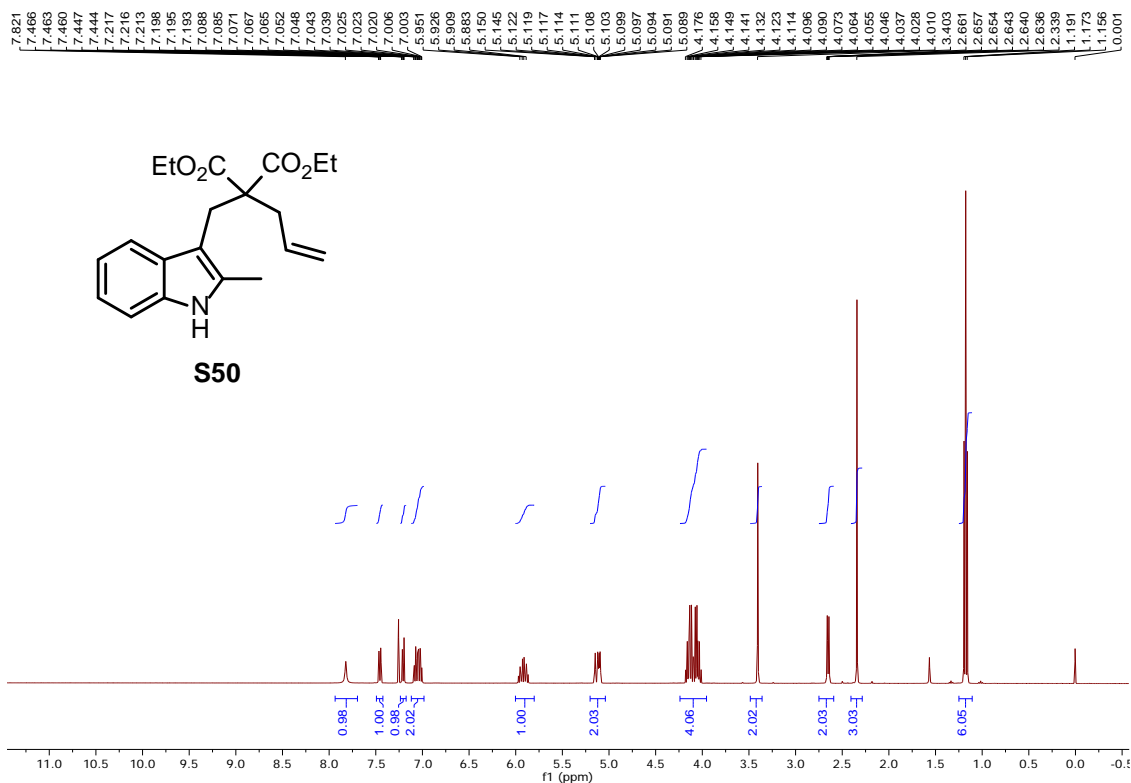

# <sup>13</sup>C NMR (101 MHz, Chloroform-*d*)

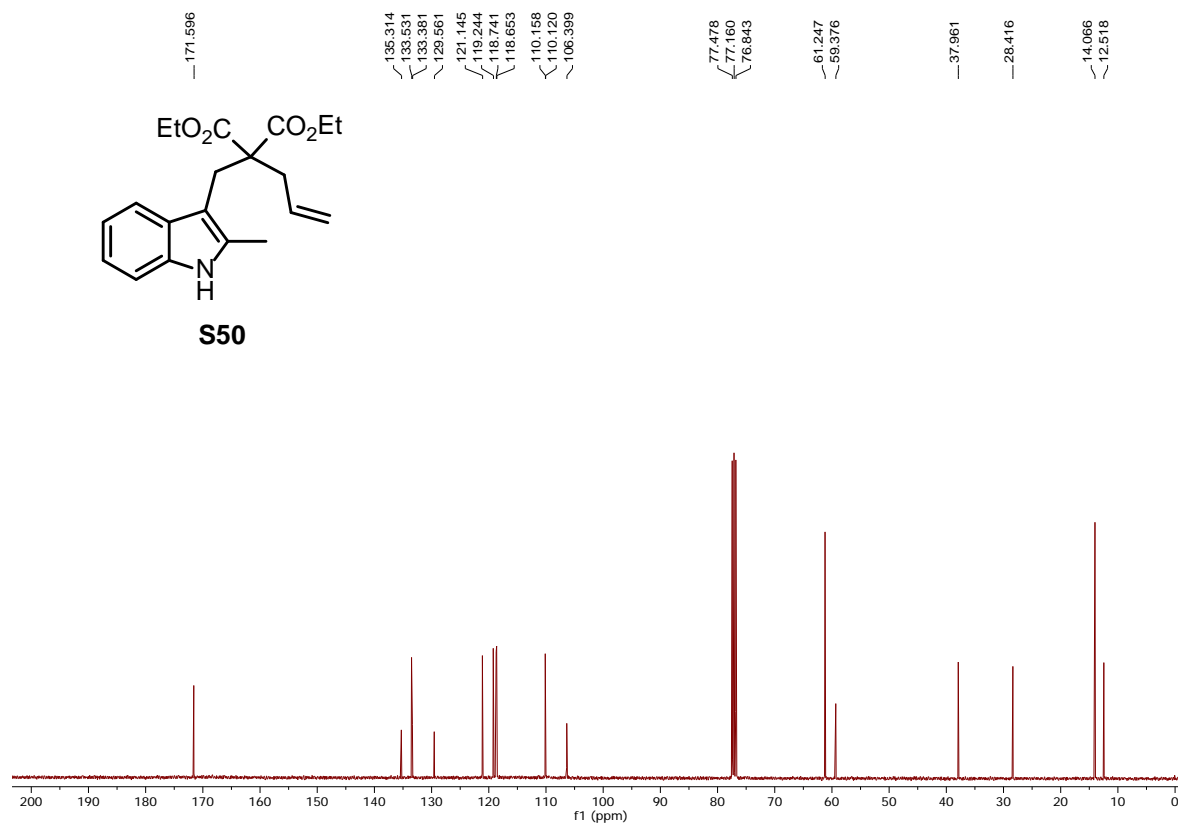

# <sup>1</sup>H NMR (400 MHz, Chloroform-*d*)

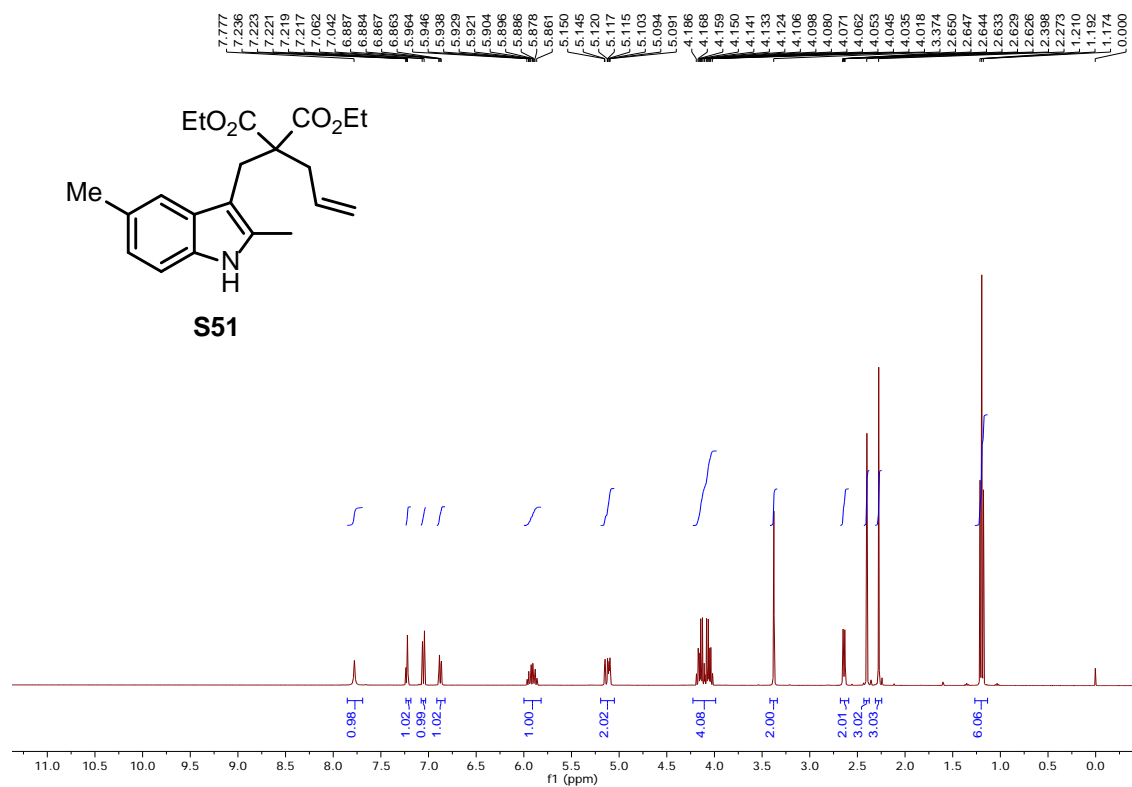

# <sup>13</sup>C NMR (101 MHz, Chloroform-*d*)

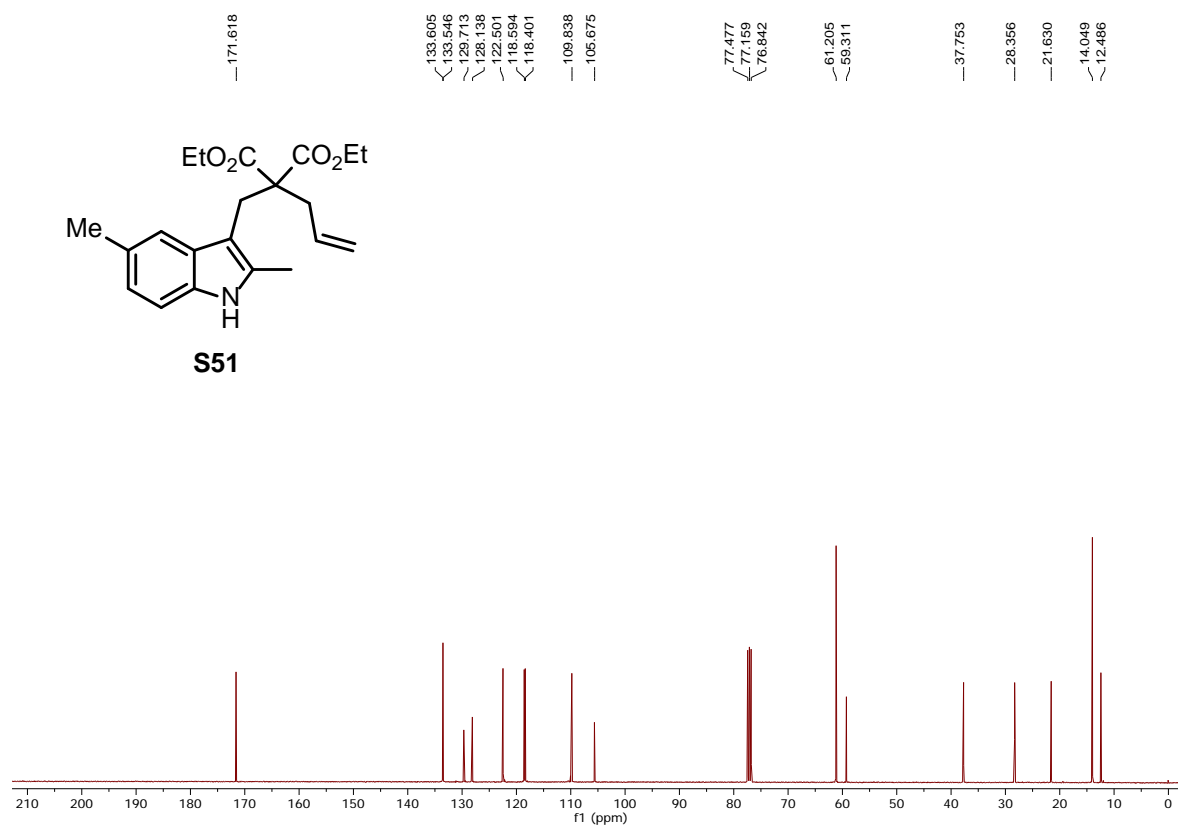

# <sup>1</sup>H NMR (400 MHz, Chloroform-*d*)

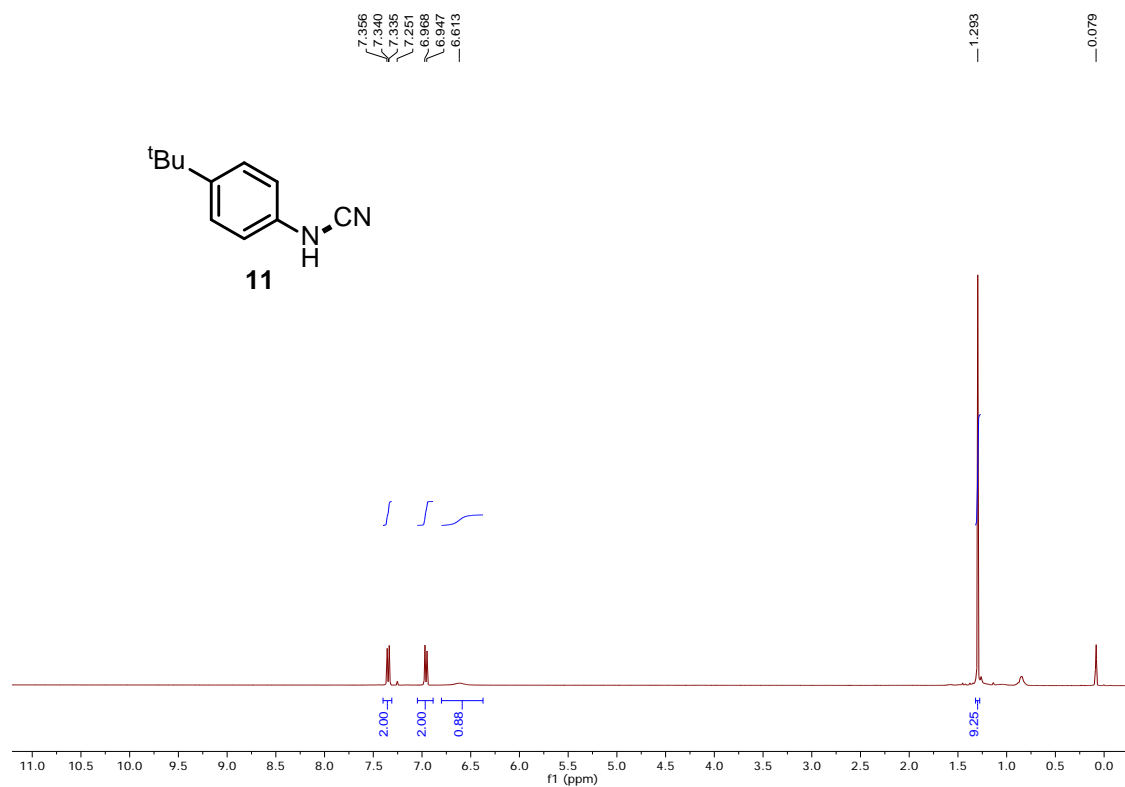

# <sup>13</sup>C NMR (101 MHz, Chloroform-*d*)

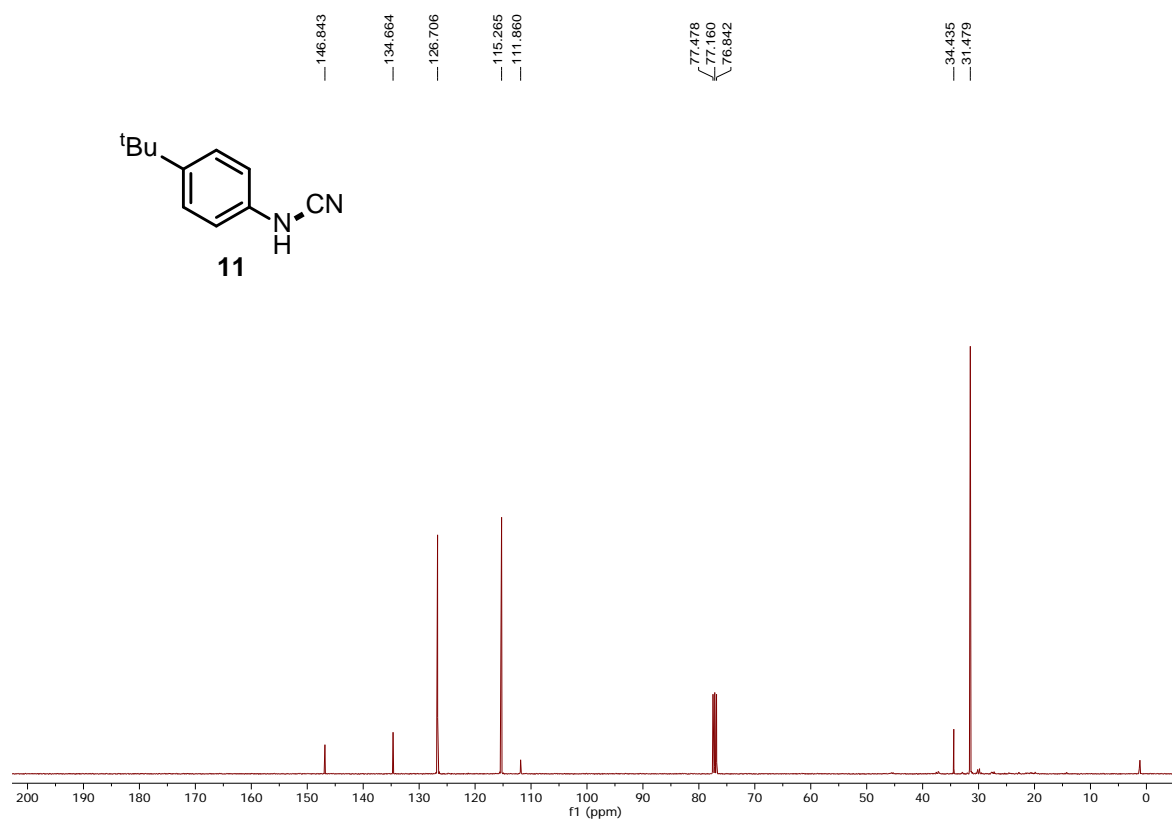

# <sup>1</sup>H NMR (300 MHz, Chloroform-*d*)

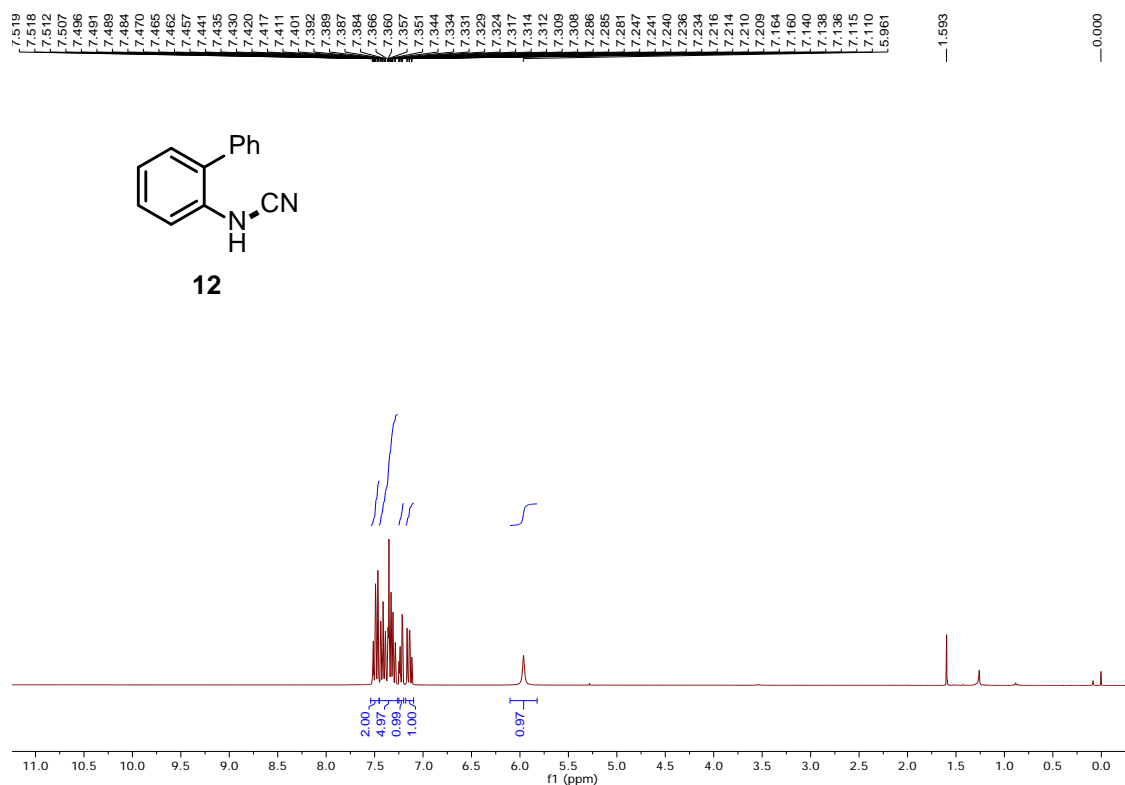

# <sup>13</sup>C NMR (75 MHz, Chloroform-*d*)

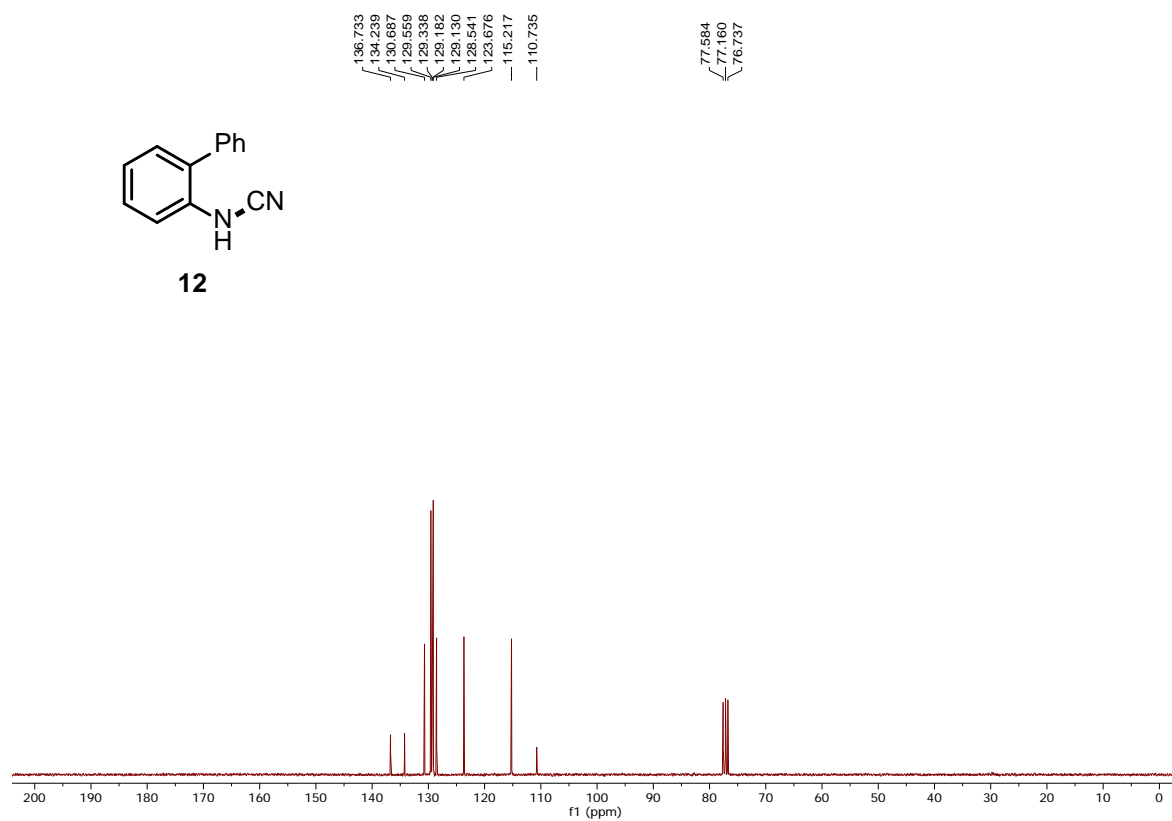

# <sup>1</sup>H NMR (300 MHz, Chloroform-*d*)

7.446  
7.437  
7.430  
7.417  
7.413  
7.410  
7.407  
7.394  
7.385  
7.376  
7.287  
7.283  
7.279  
7.270  
7.265  
7.261  
7.256  
7.241  
7.234  
7.224

—0.000

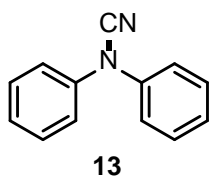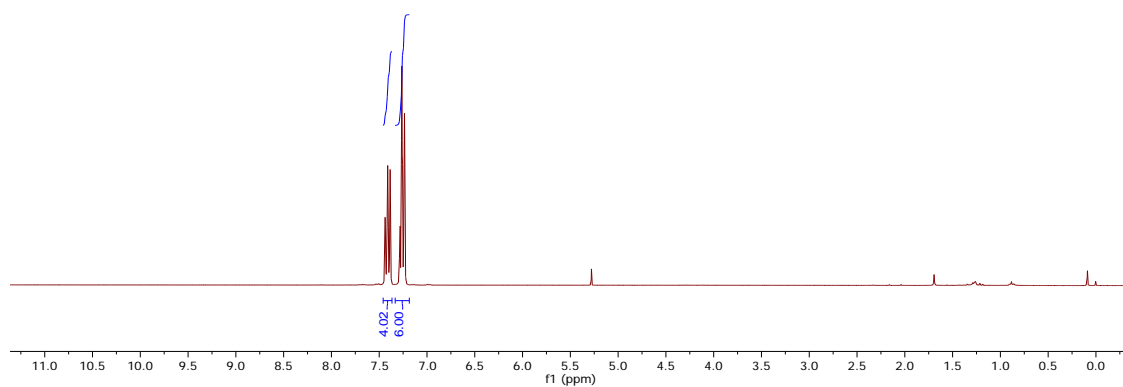

# <sup>13</sup>C NMR (75 MHz, Chloroform-*d*)

139.185  
129.970  
126.404  
121.428  
112.703

77.584  
77.159  
76.736

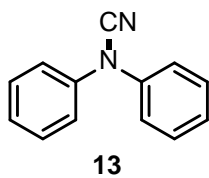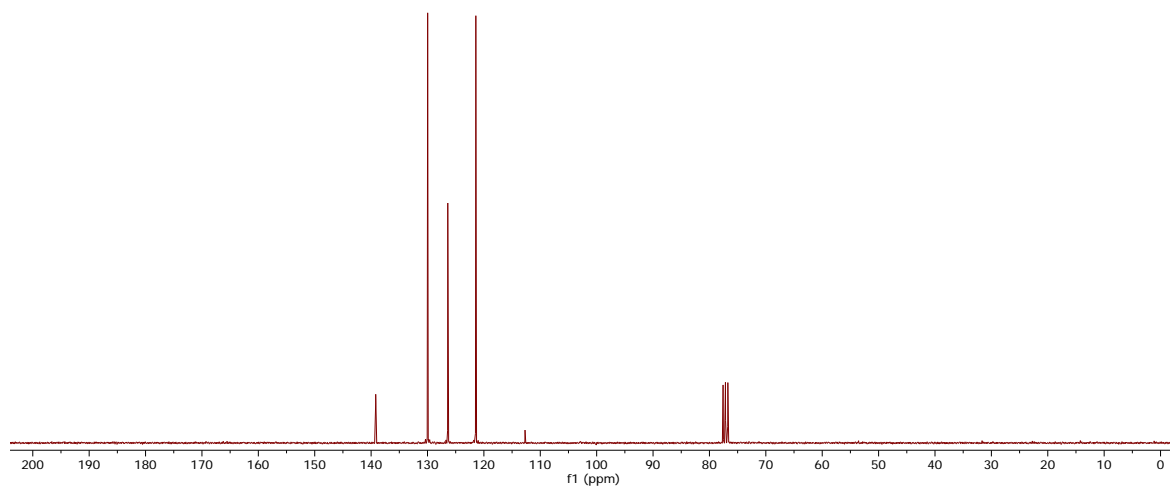

# <sup>1</sup>H NMR (300 MHz, Chloroform-d)

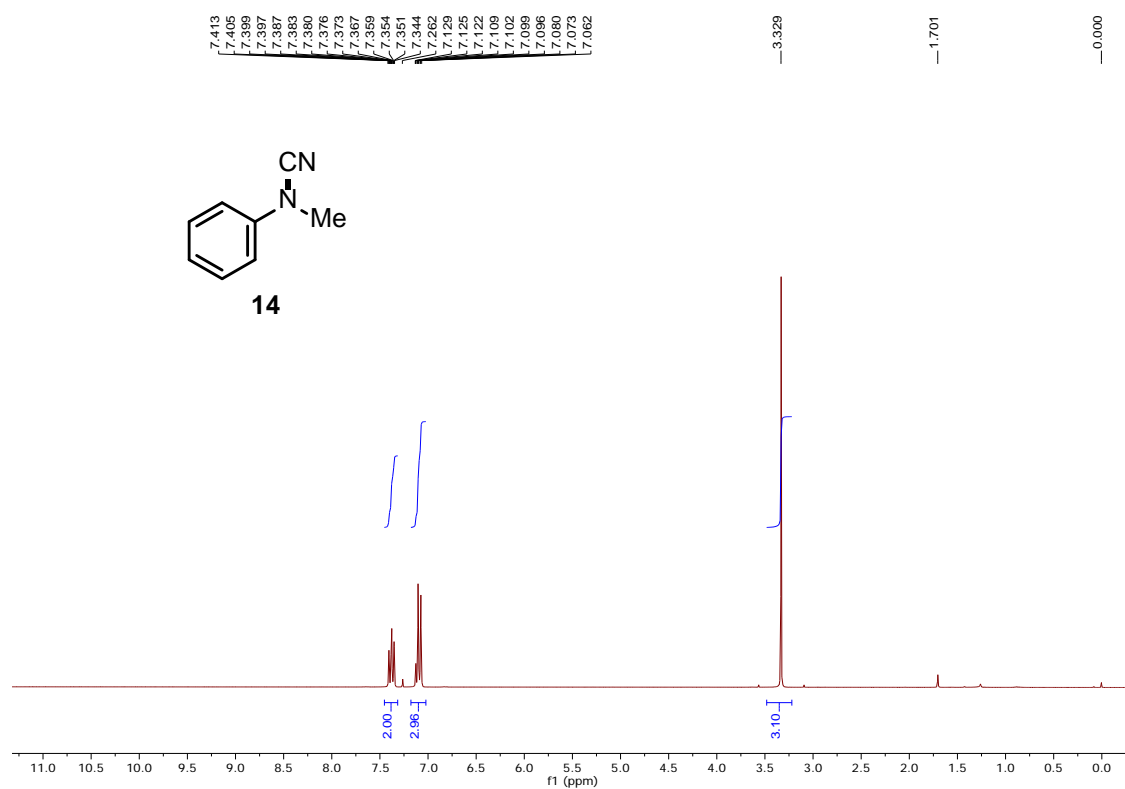

# <sup>13</sup>C NMR (75 MHz, Chloroform-d)

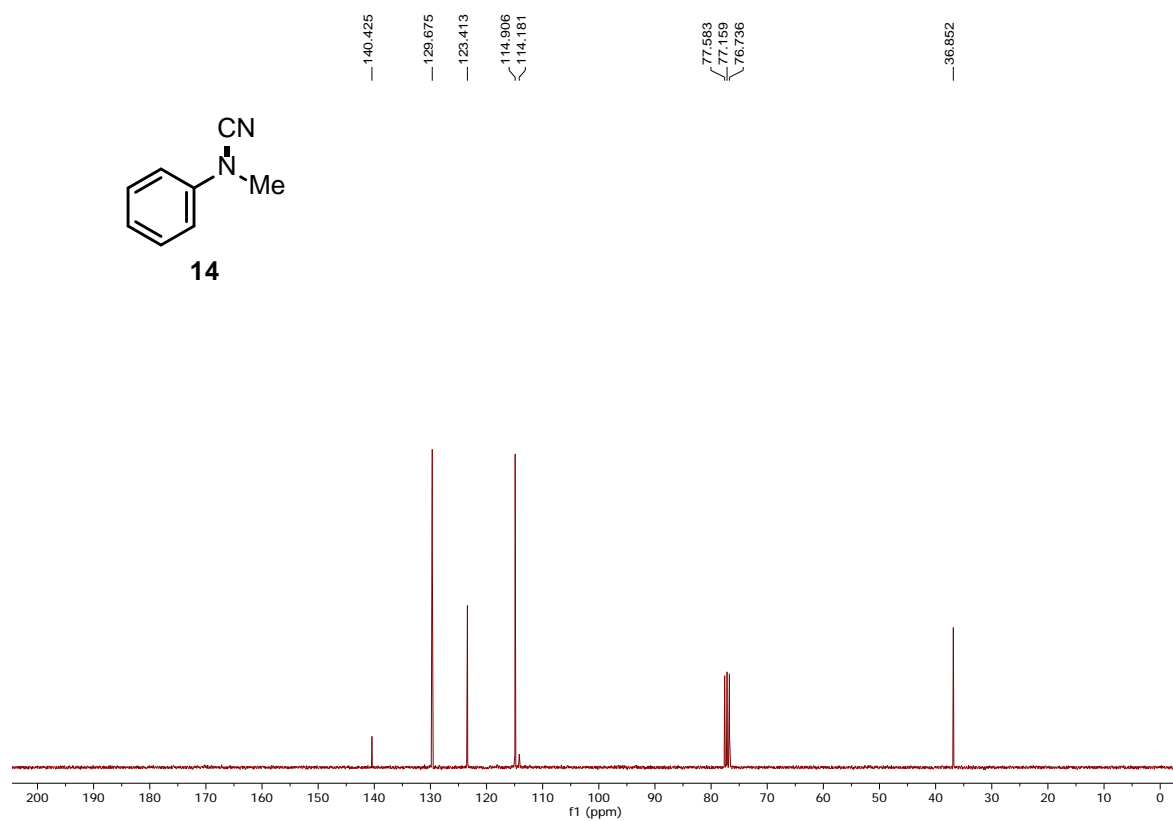

# <sup>1</sup>H NMR (300 MHz, Chloroform-*d*)

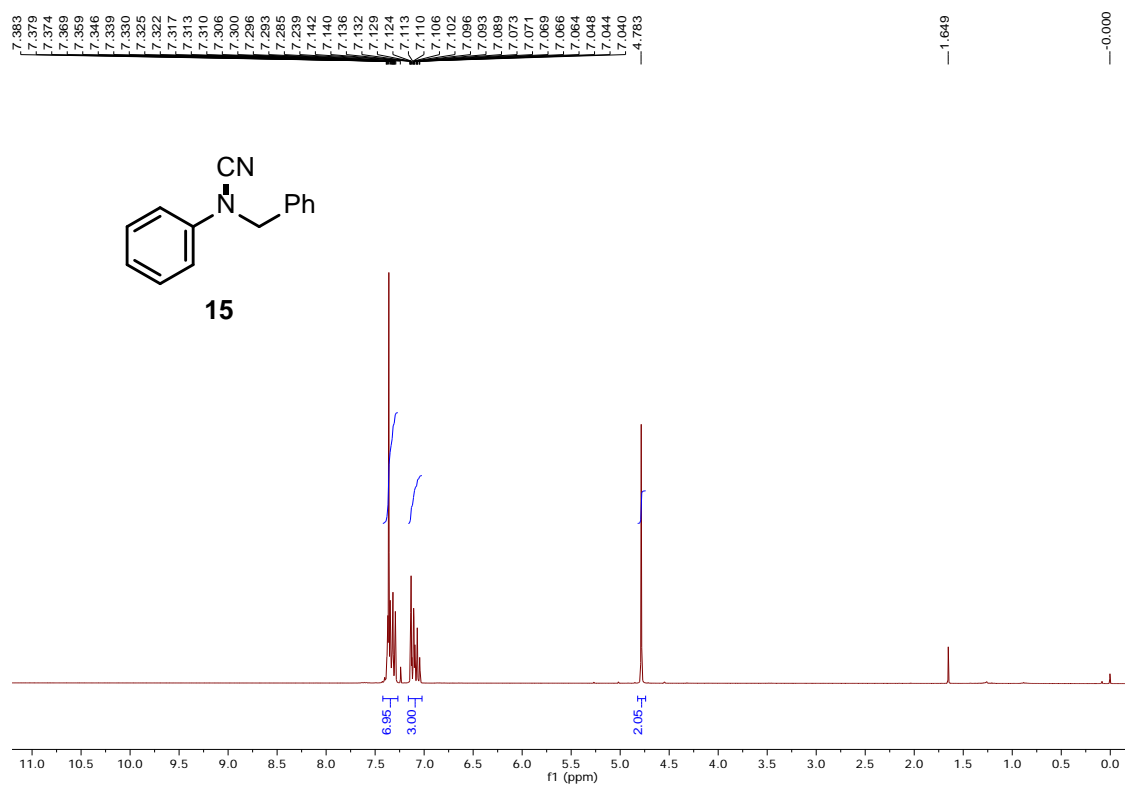

# <sup>13</sup>C NMR (75 MHz, Chloroform-*d*)

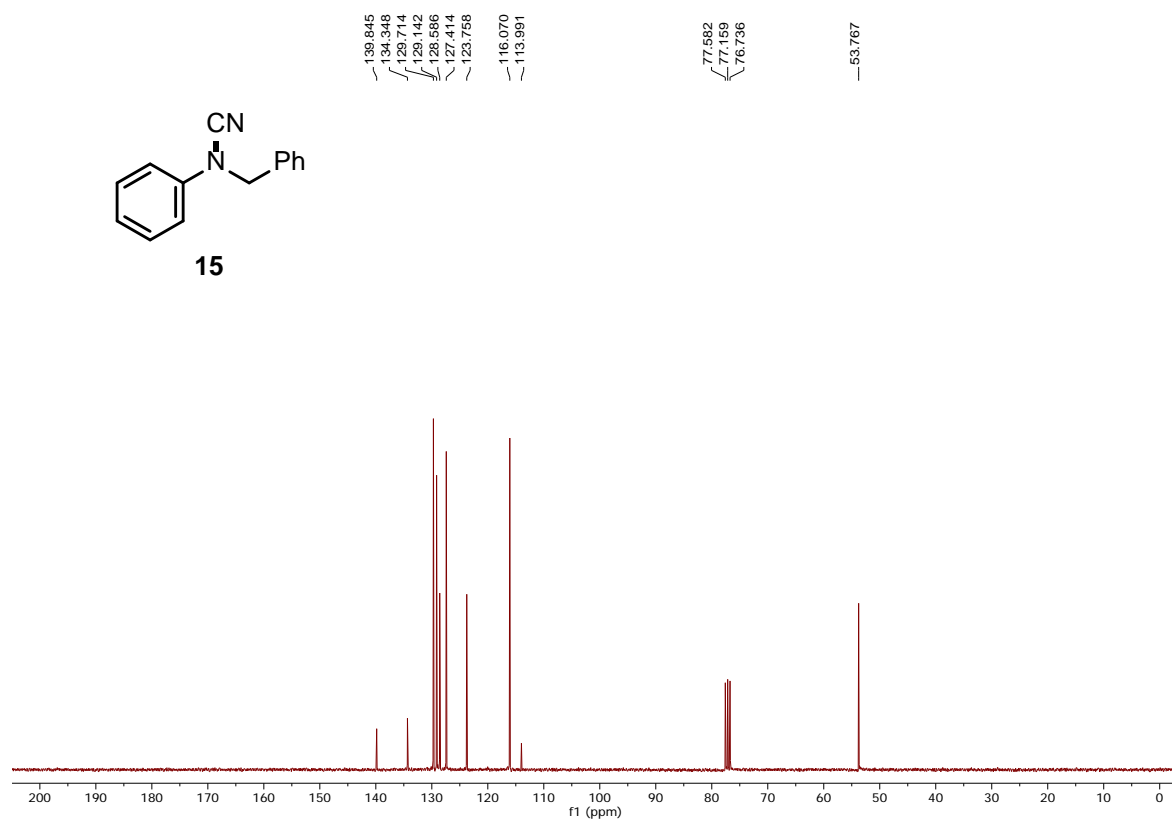

# <sup>1</sup>H NMR (300 MHz, Chloroform-*d*)

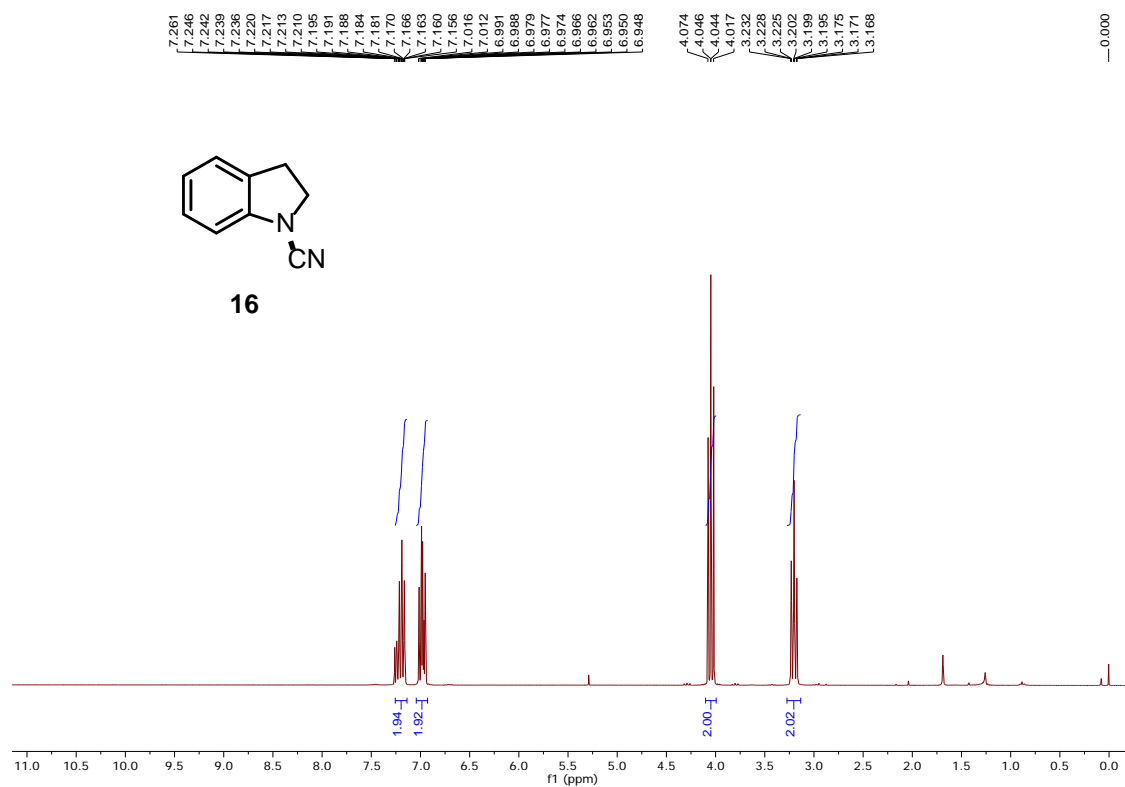

# <sup>13</sup>C NMR (75 MHz, Chloroform-*d*)

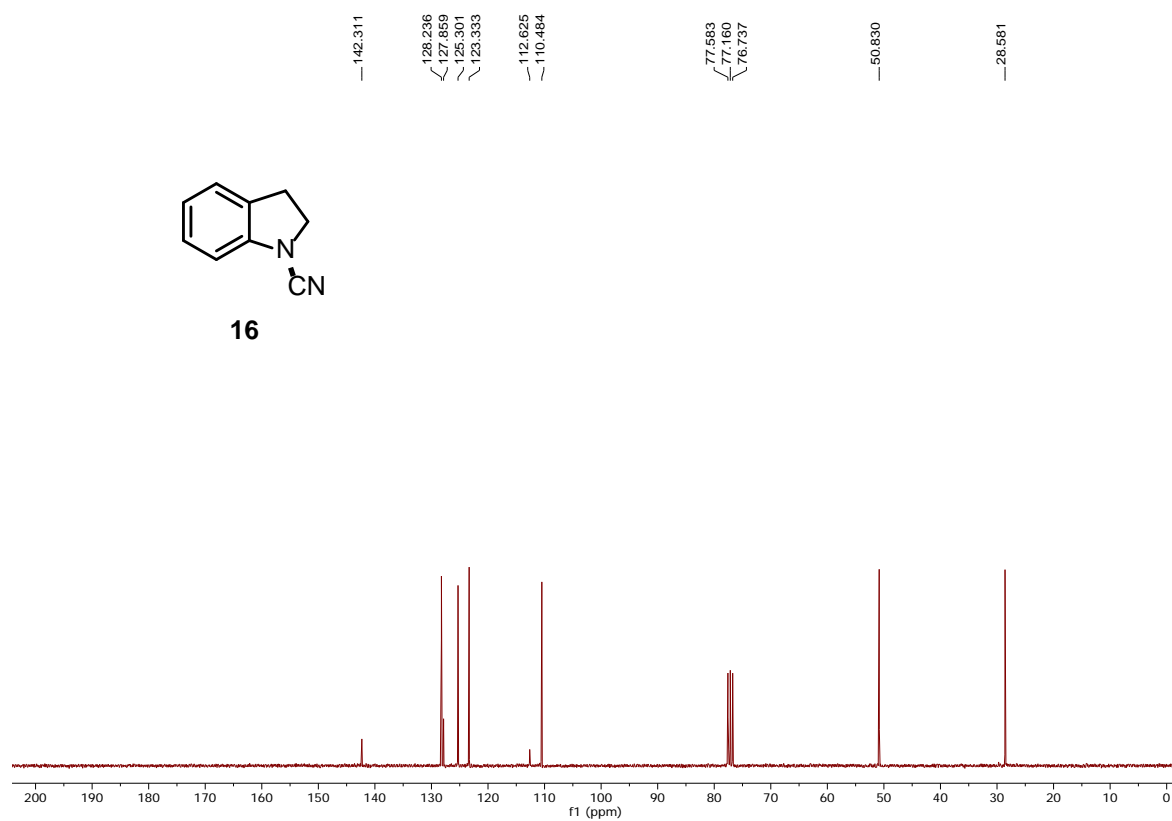



# <sup>1</sup>H NMR (300 MHz, Chloroform-*d*)

7.261  
7.258  
7.228  
7.226  
7.223  
7.220  
7.206  
7.200  
7.198  
7.196  
7.193  
7.182  
7.175  
7.172  
7.155  
7.147  
7.090  
7.087  
7.085  
7.079  
7.076  
7.065  
7.061  
7.058  
7.055  
6.984  
6.979  
6.976  
6.964  
6.958  
6.956  
6.939  
6.931

-0.000

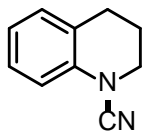

17

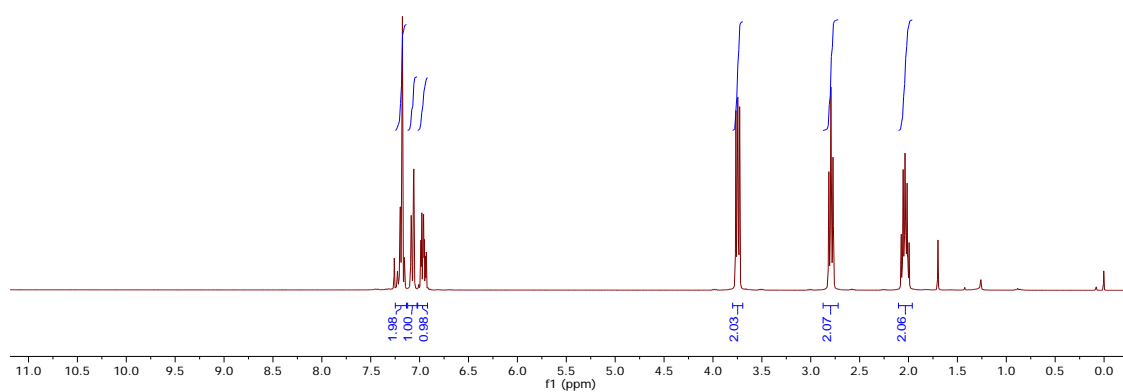

# <sup>13</sup>C NMR (75 MHz, Chloroform-*d*)

135.616  
129.823  
127.660  
124.008  
122.849  
115.672  
113.811

77.586  
77.161  
76.737

48.632

26.268  
21.053

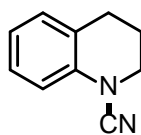

17

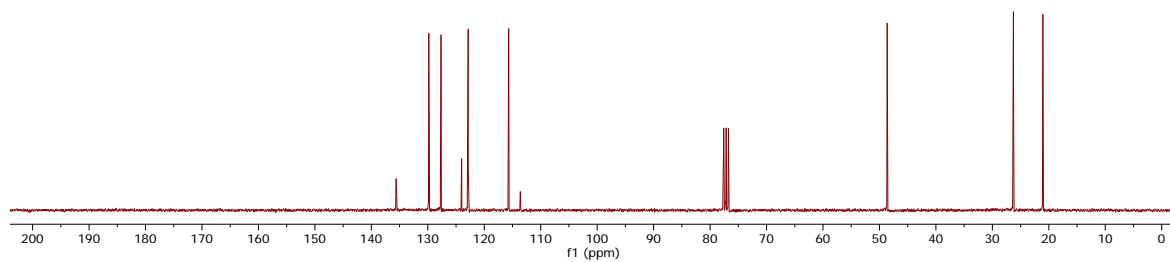

# <sup>1</sup>H NMR (300 MHz, Chloroform-*d*)

7.404  
7.400  
7.377  
7.373  
7.321  
7.318  
7.315  
7.313  
7.298  
7.294  
7.291  
7.288  
7.270  
7.264  
7.262  
7.245  
7.226  
7.223  
7.218  
7.198  
7.194  
7.192  
7.190  
7.166  
7.162  
7.142  
7.138  
7.118  
7.113

—4.039

—1.626

—0.081  
—0.000

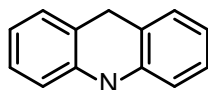

**18**

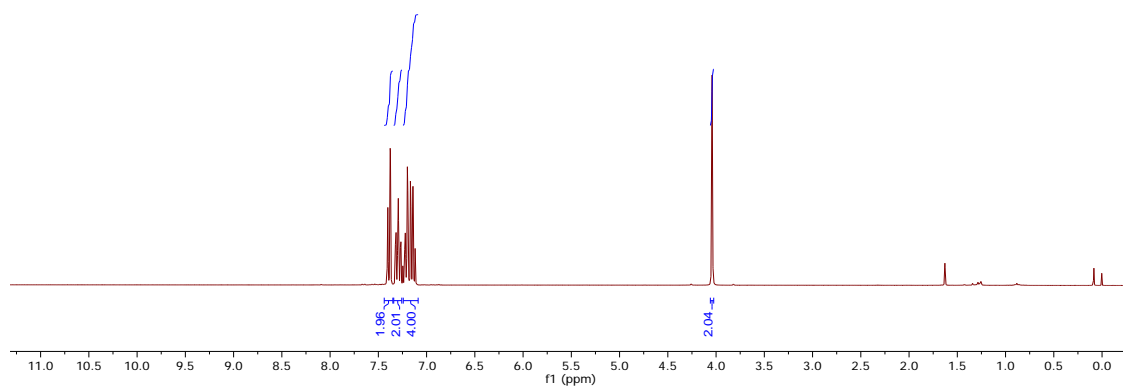

# <sup>13</sup>C NMR (75 MHz, Chloroform-*d*)

134.550  
128.988  
127.872  
125.281  
123.341  
115.828  
108.374

77.682  
77.159  
76.736

—30.608

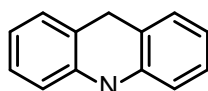

**18**

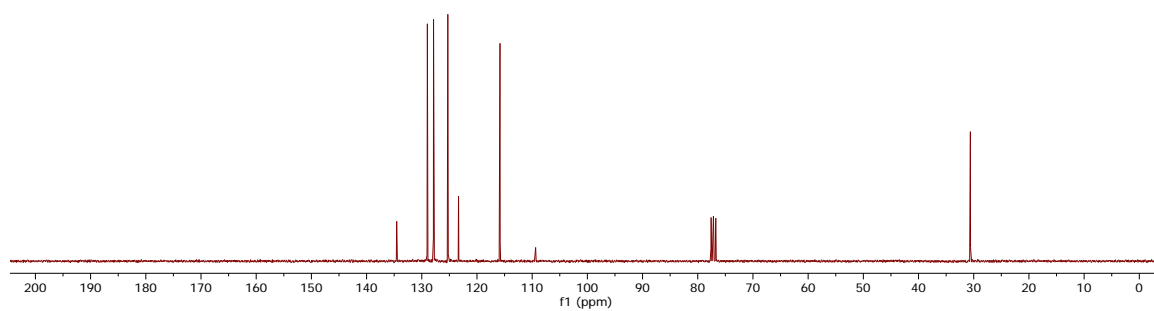

# <sup>1</sup>H NMR (300 MHz, Chloroform-*d*)

7.256  
7.102  
7.091  
7.083  
7.076  
7.074  
7.069  
7.059  
7.047  
7.039  
7.031  
7.023  
7.018  
7.015  
7.006  
7.004  
6.995  
6.991  
6.987  
6.979  
6.970  
6.894  
6.887  
6.874  
6.865  
6.860  
6.857  
6.849  
6.842  
6.830

— 1.619

— 0.000

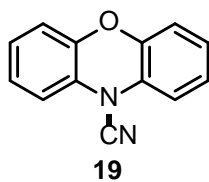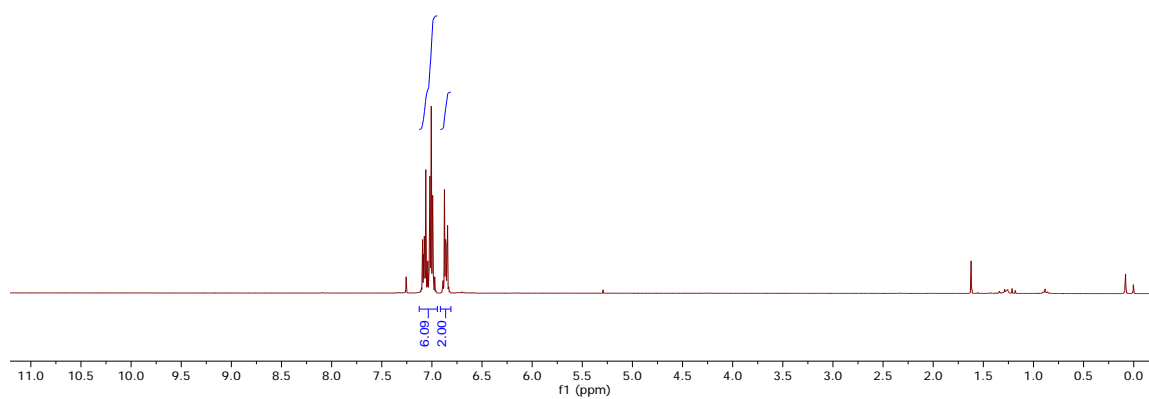

# <sup>13</sup>C NMR (75 MHz, Chloroform-*d*)

— 143.469

126.312

124.290

123.874

117.030

115.656

— 107.228

77.583

77.160

76.737

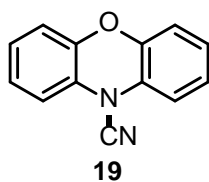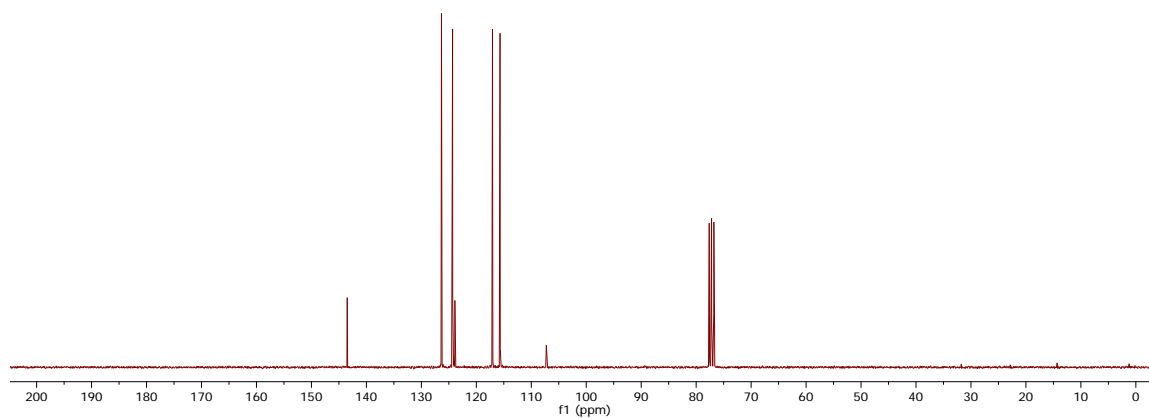

# <sup>1</sup>H NMR (300 MHz, Chloroform-*d*)

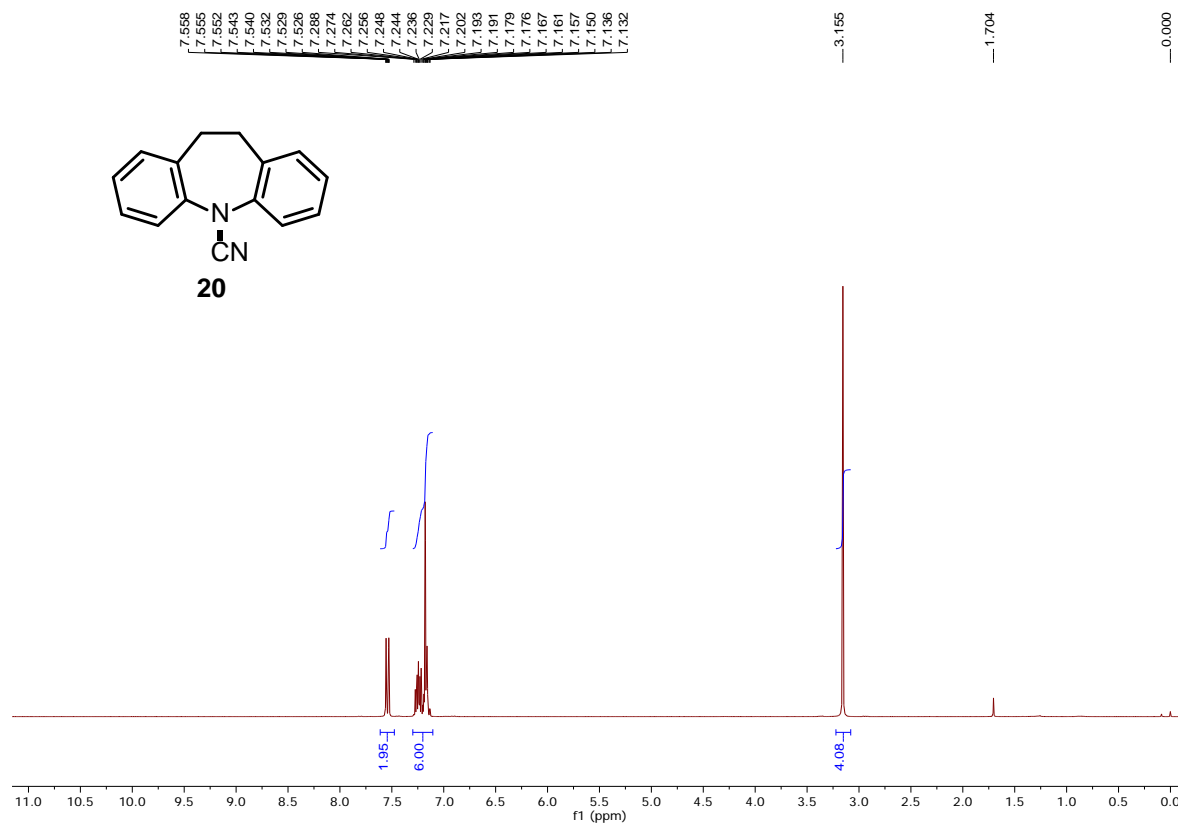

# <sup>13</sup>C NMR (75 MHz, Chloroform-*d*)

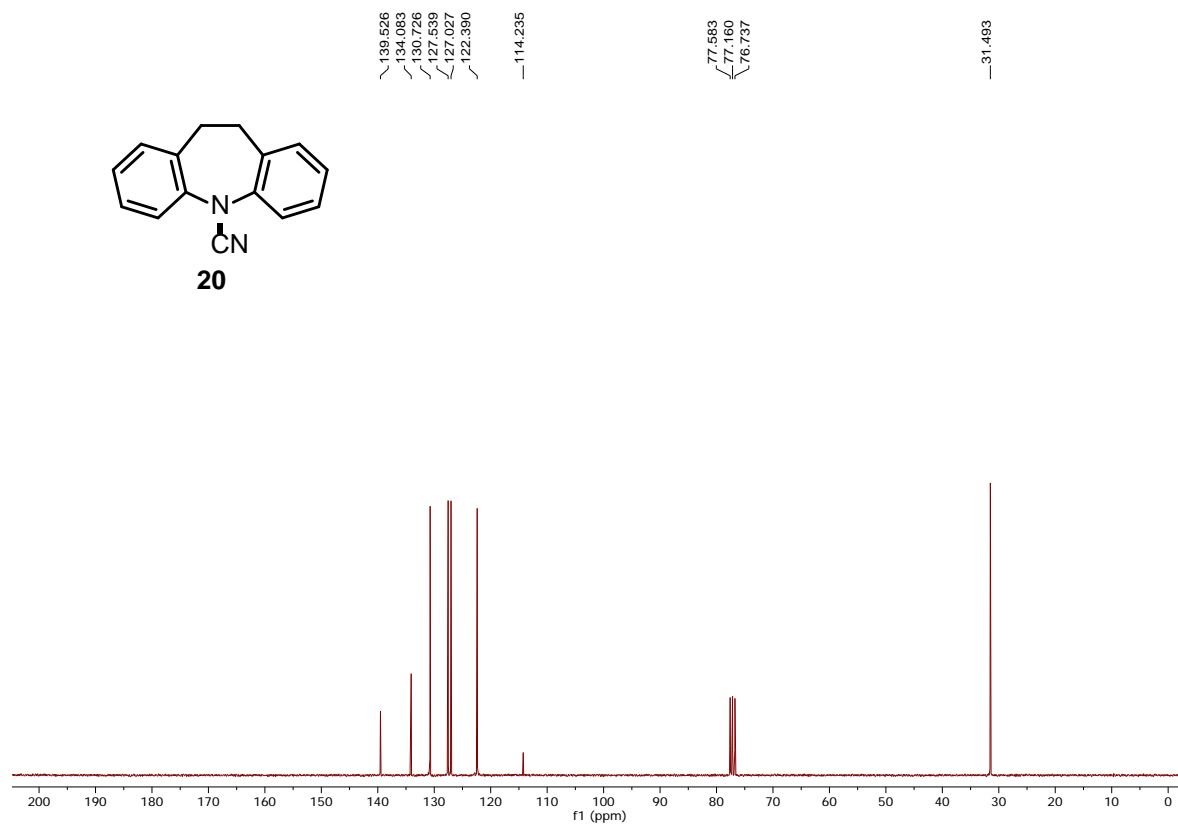

# <sup>1</sup>H NMR (300 MHz, Chloroform-*d*)

7.489  
7.485  
7.462  
7.458  
7.397  
7.391  
7.374  
7.368  
7.364  
7.347  
7.341  
7.264  
7.259  
7.248  
7.238  
7.224  
7.214  
7.210  
7.199  
7.192  
7.173  
7.167  
6.740  
6.728

— 1.694

— 0.000

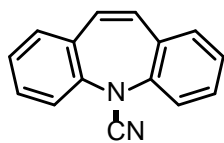

21

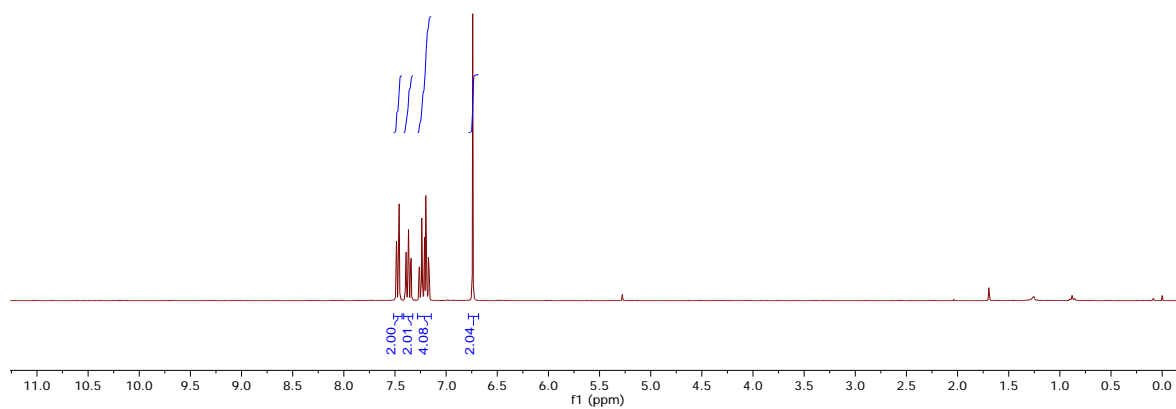

# <sup>13</sup>C NMR (75 MHz, Chloroform-*d*)

140.835  
132.381  
131.110  
130.239  
130.078  
127.595  
122.905  
114.587

77.583  
77.160  
76.736

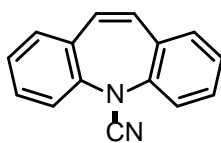

21

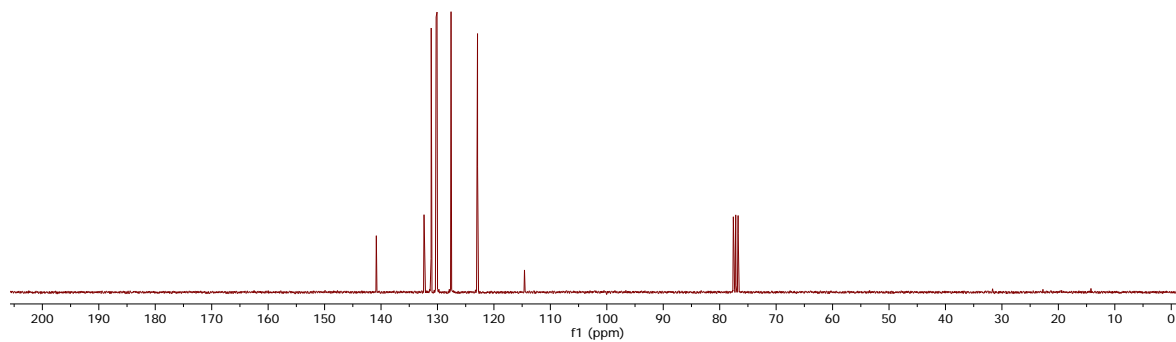

# <sup>1</sup>H NMR (300 MHz, Chloroform-*d*)

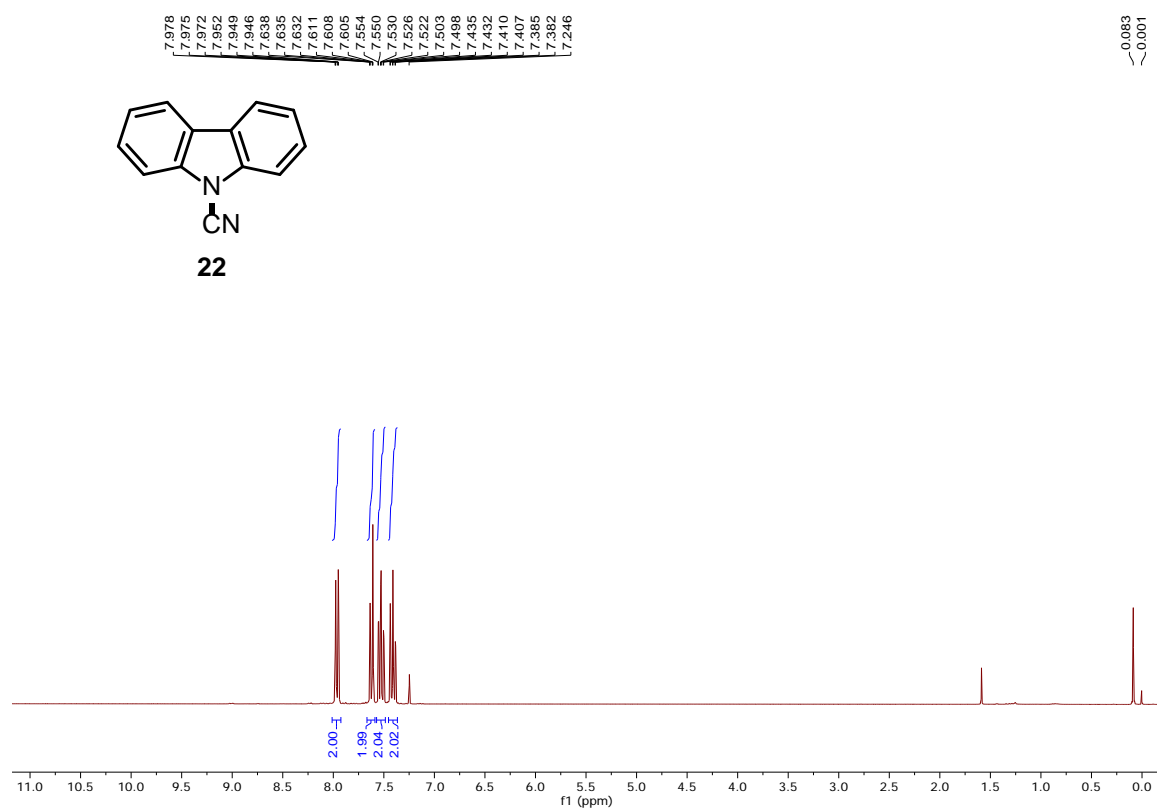

# <sup>13</sup>C NMR (75 MHz, Chloroform-*d*)

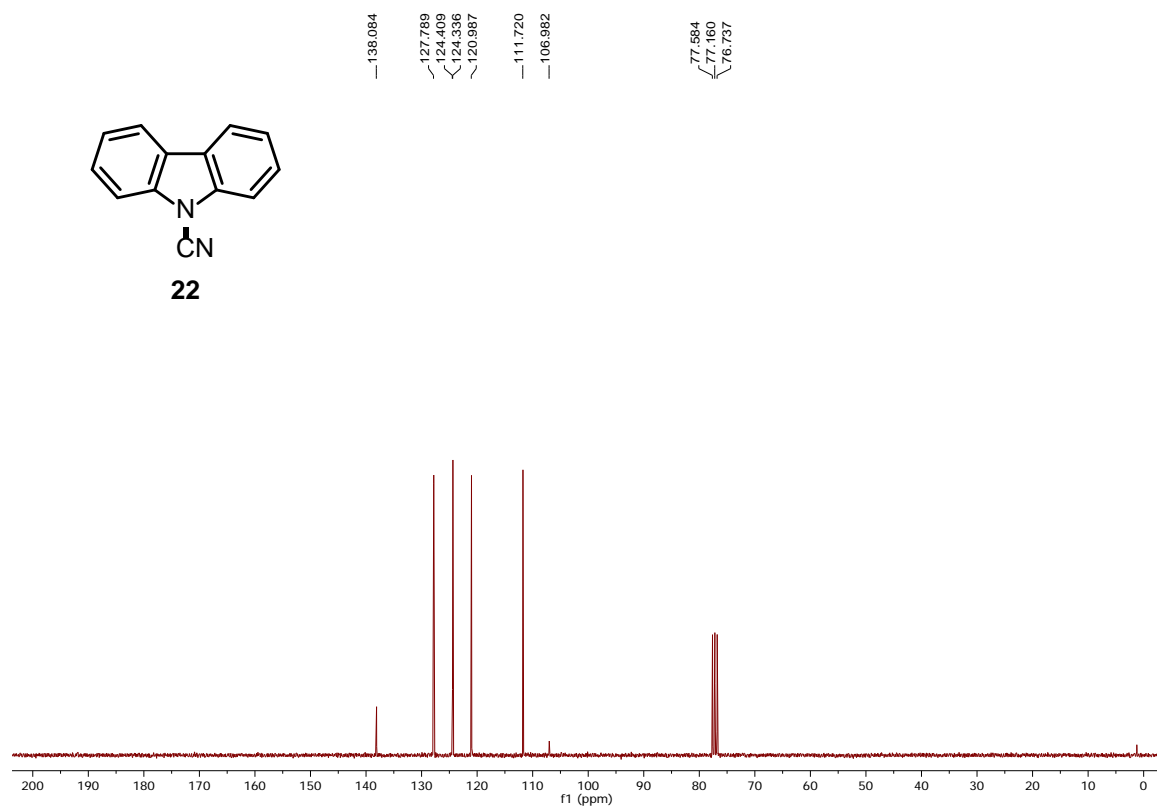

# <sup>1</sup>H NMR (300 MHz, Chloroform-*d*)

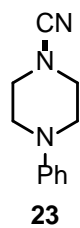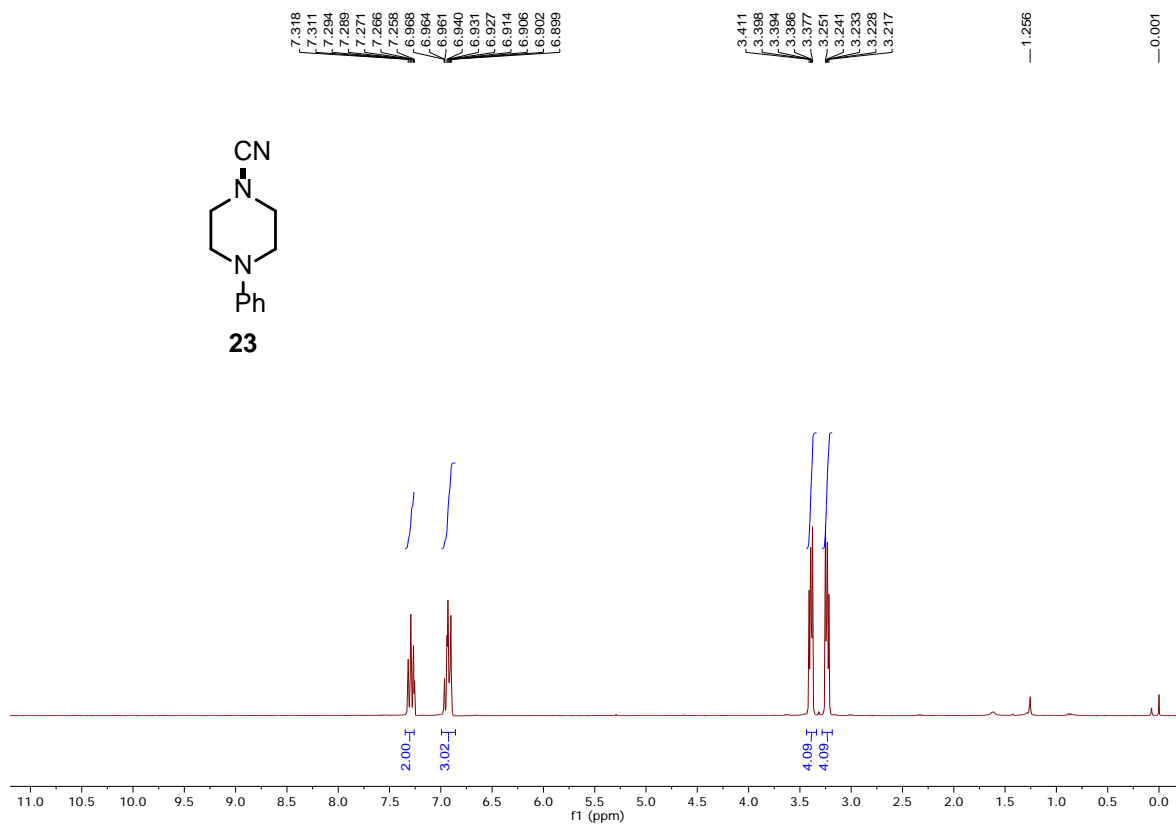

# <sup>13</sup>C NMR (75 MHz, Chloroform-*d*)

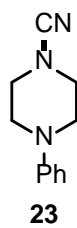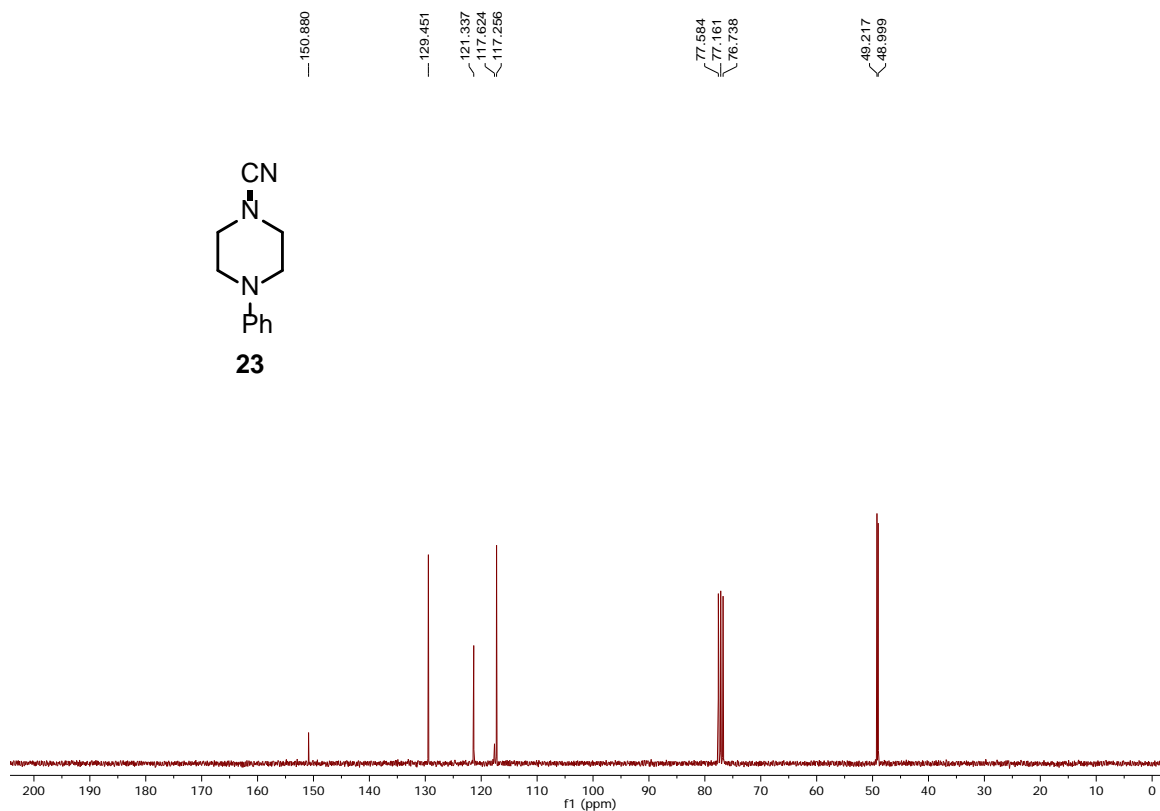

# <sup>1</sup>H NMR (300 MHz, Chloroform-d)

8.241  
8.238  
8.235  
8.232  
8.213  
8.210  
8.206  
8.203  
7.966  
7.963  
7.959  
7.939  
7.935  
7.932  
7.921  
7.915  
7.910  
7.895  
7.890  
7.886  
7.708  
7.704  
7.685  
7.680  
7.675  
7.657  
7.652  
7.622  
7.618  
7.599  
7.595  
7.591  
7.572  
7.568  
7.506  
7.482  
7.479  
7.465  
7.240

— 1.573

— 0.084  
— 0.001

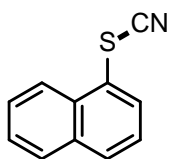

24

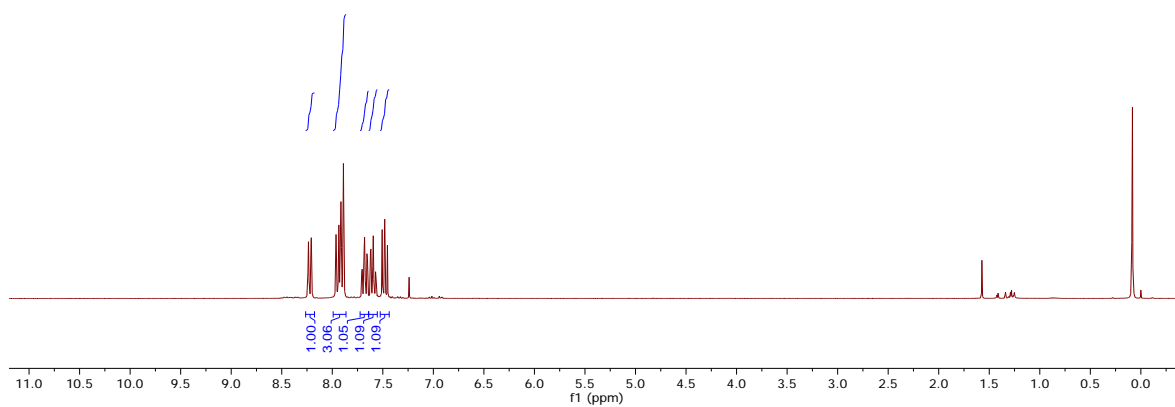

# <sup>13</sup>C NMR (75 MHz, Chloroform-d)

134.451  
132.500  
132.317  
131.676  
129.104  
128.250  
127.336  
125.993  
124.338  
120.865  
— 110.769

77.584  
77.160  
76.736

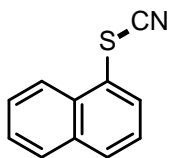

24

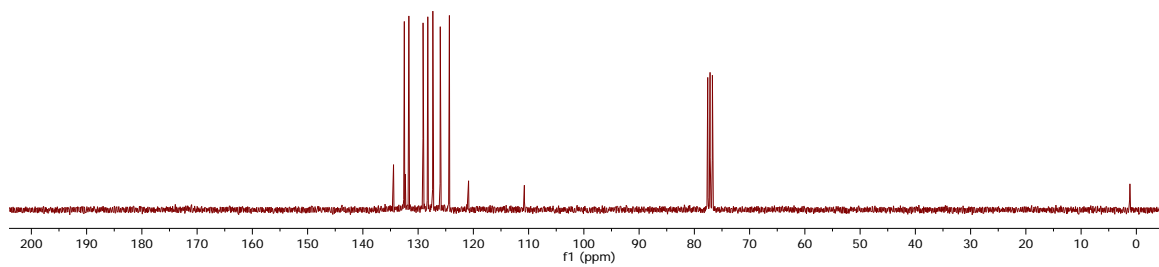



# <sup>1</sup>H NMR (300 MHz, Chloroform-*d*)

7.734  
7.729  
7.707  
7.702  
7.629  
7.625  
7.603  
7.598  
7.465  
7.460  
7.439  
7.435  
7.413  
7.409  
7.285  
7.280  
7.261  
7.259  
7.254  
7.233  
7.228

— 1.575

— 0.074  
— 0.001

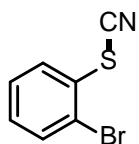

25

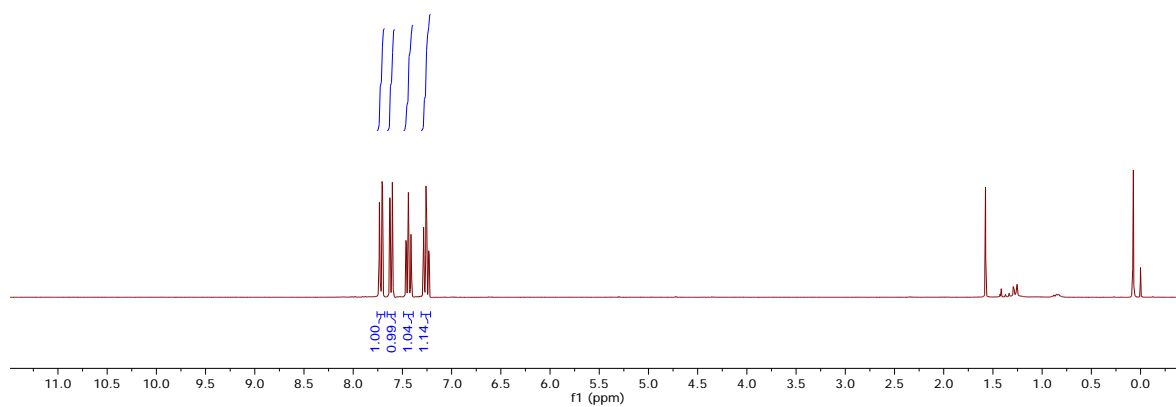

# <sup>13</sup>C NMR (75 MHz, Chloroform-*d*)

133.692  
130.198  
129.557  
129.188  
127.272  
121.897

— 109.721

77.565  
77.161  
76.737

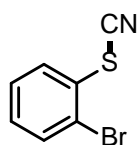

25

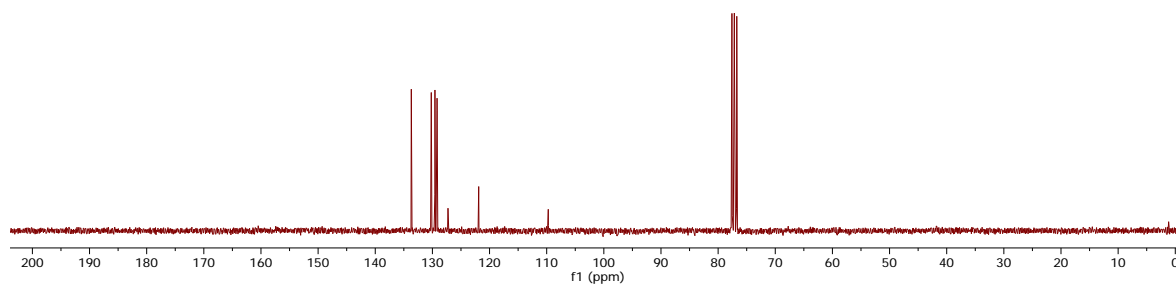

# <sup>1</sup>H NMR (300 MHz, Chloroform-*d*)

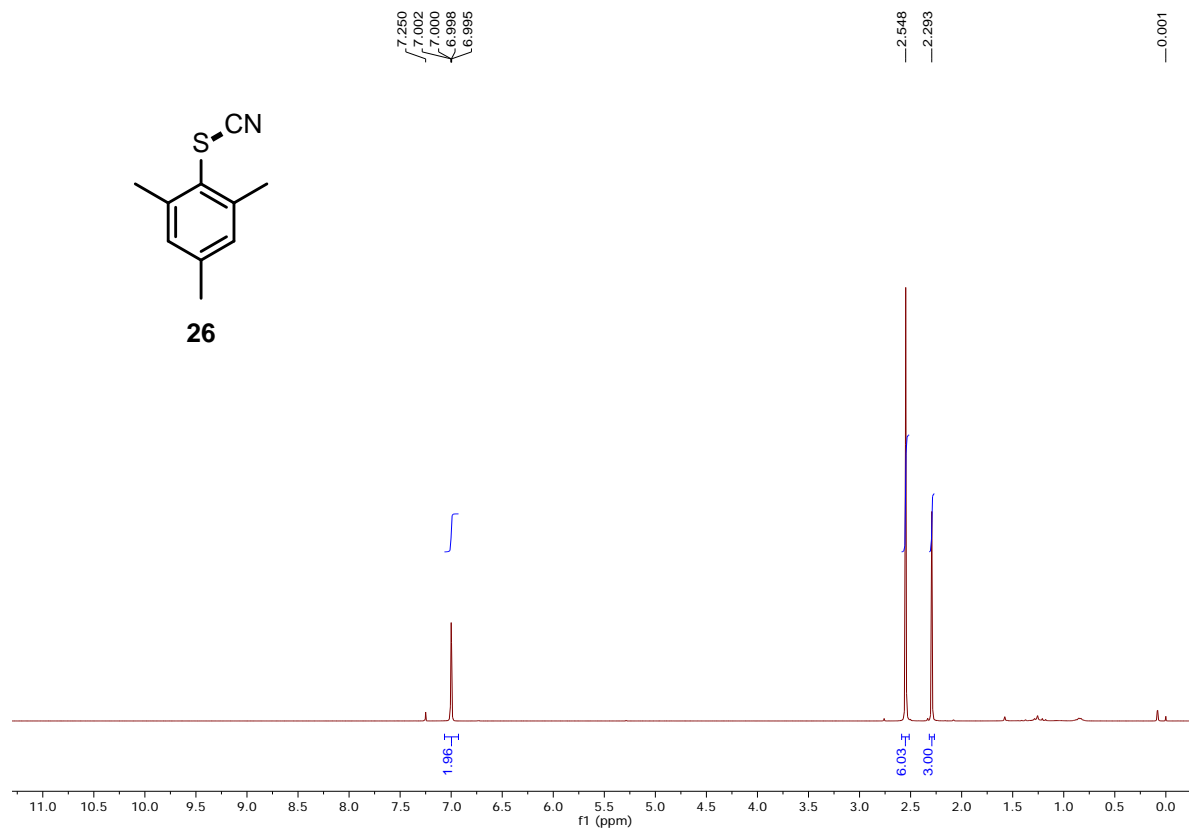

# <sup>13</sup>C NMR (75 MHz, Chloroform-*d*)

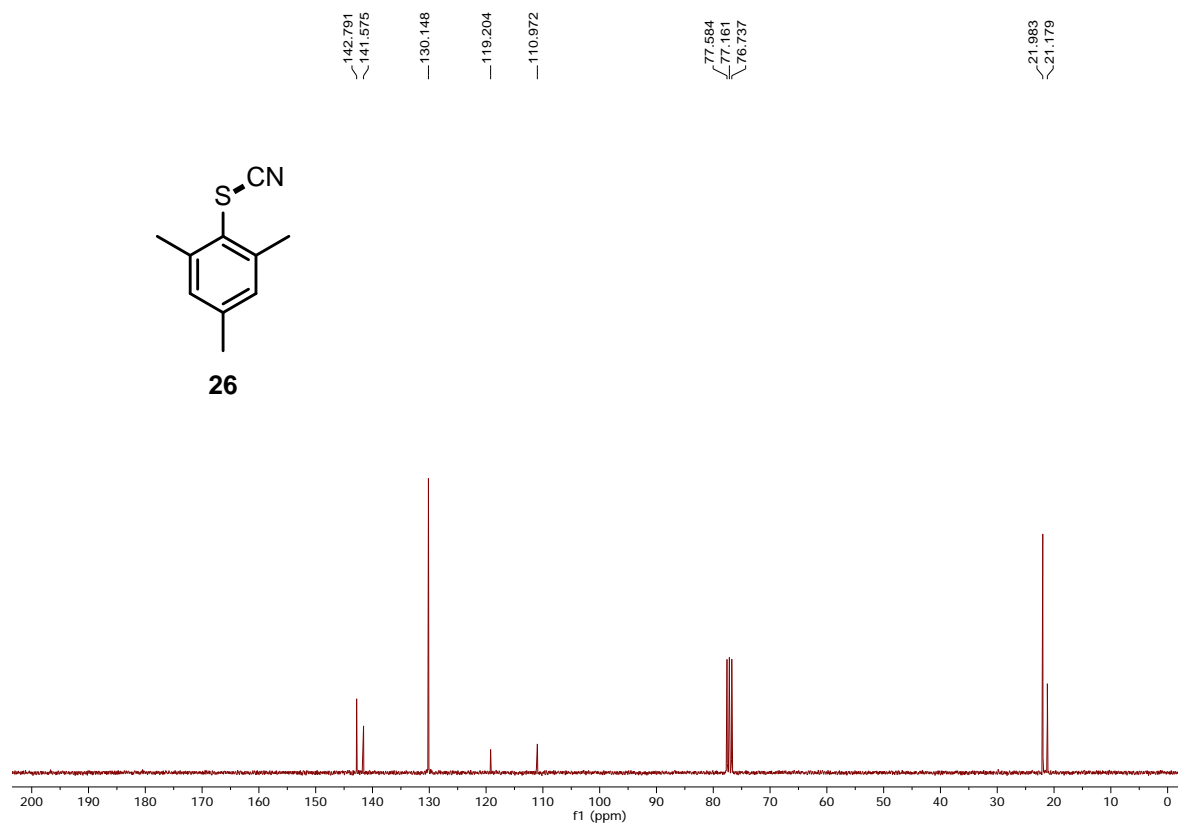

# <sup>1</sup>H NMR (300 MHz, Chloroform-*d*)

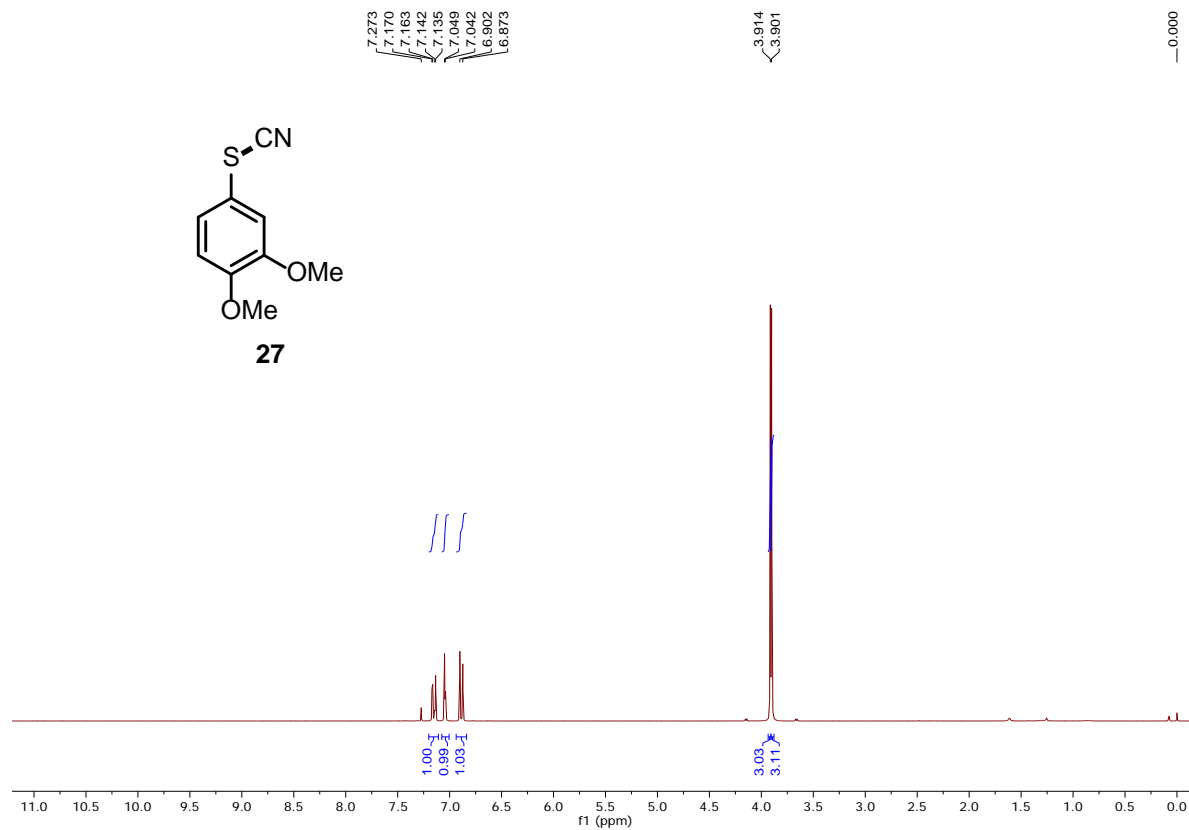

# <sup>13</sup>C NMR (75 MHz, Chloroform-*d*)

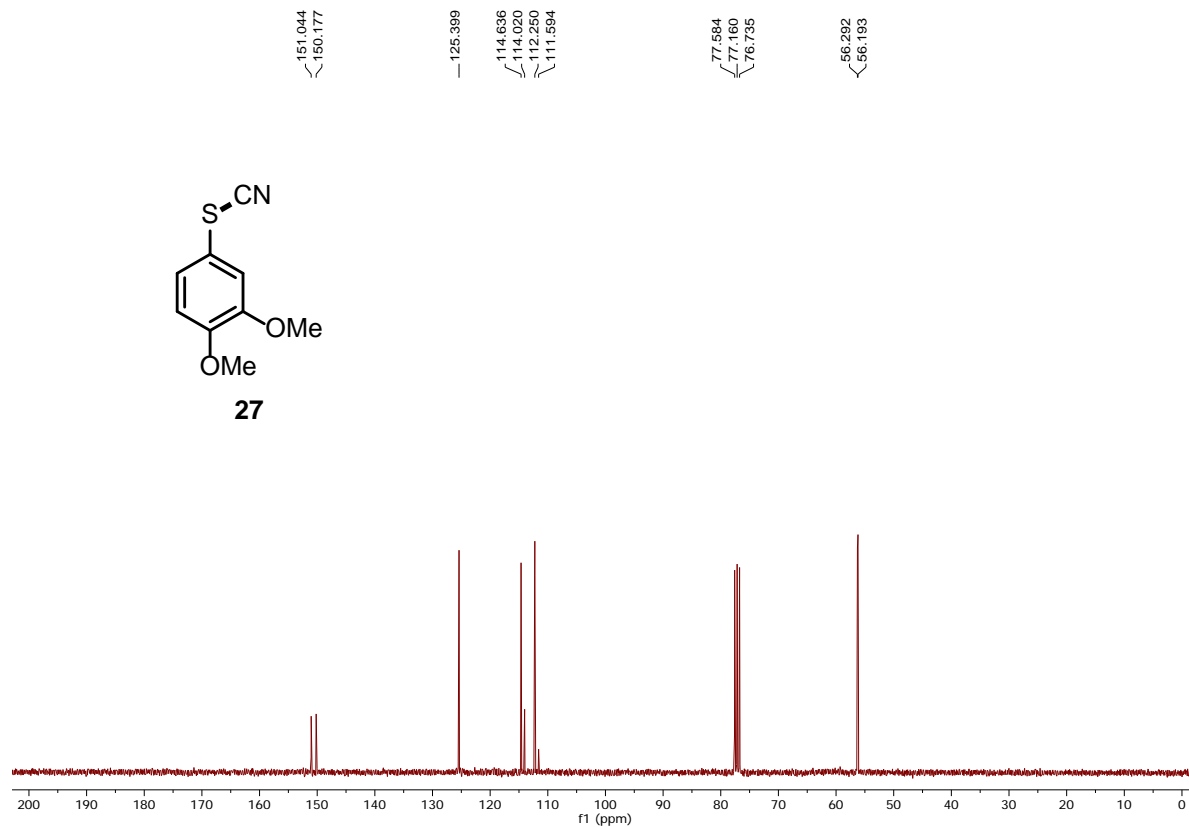

# <sup>1</sup>H NMR (300 MHz, Chloroform-*d*)

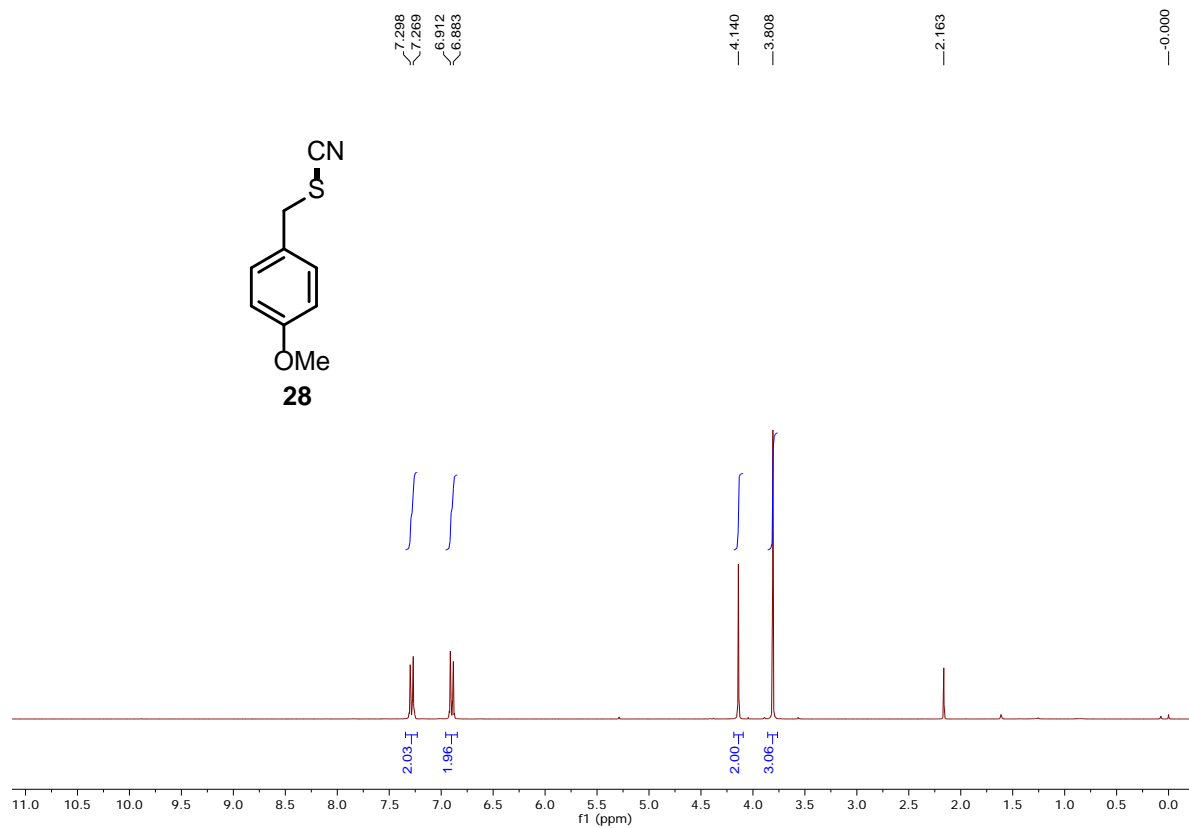

# <sup>13</sup>C NMR (75 MHz, Chloroform-*d*)

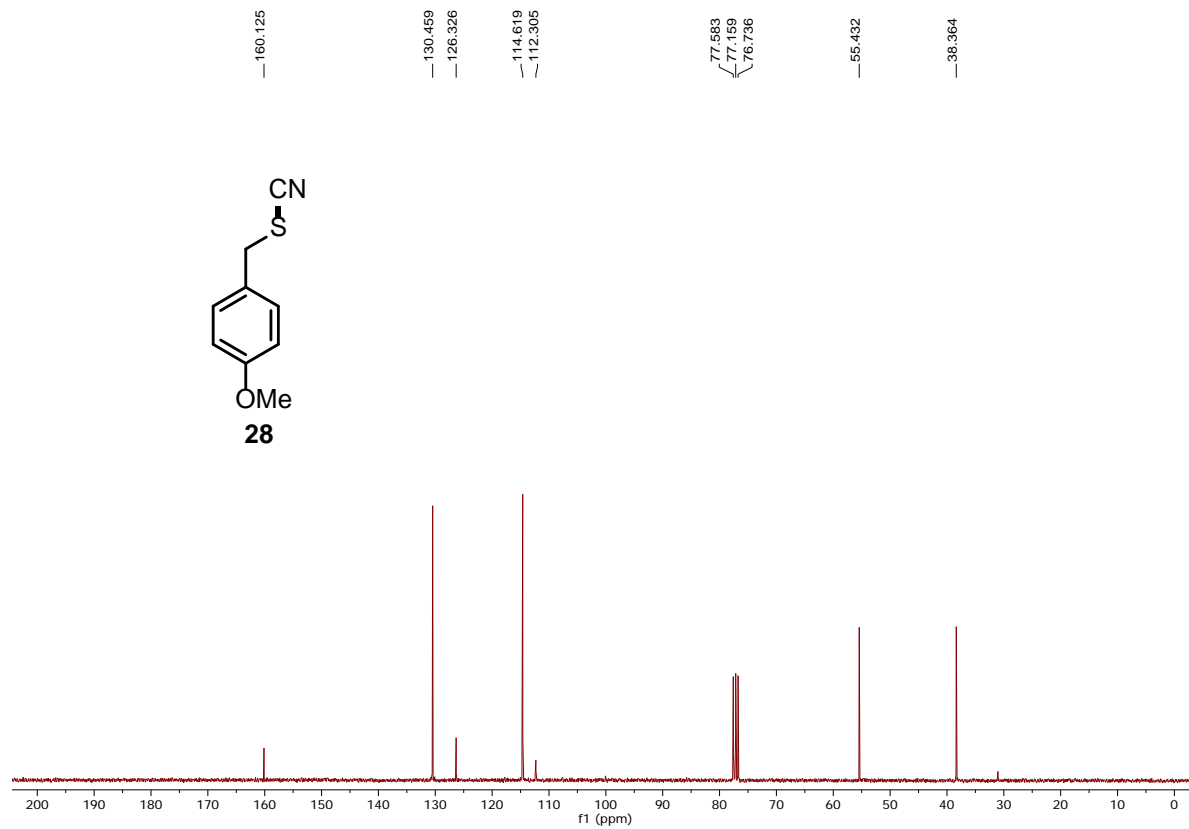

# <sup>1</sup>H NMR (300 MHz, Chloroform-*d*)

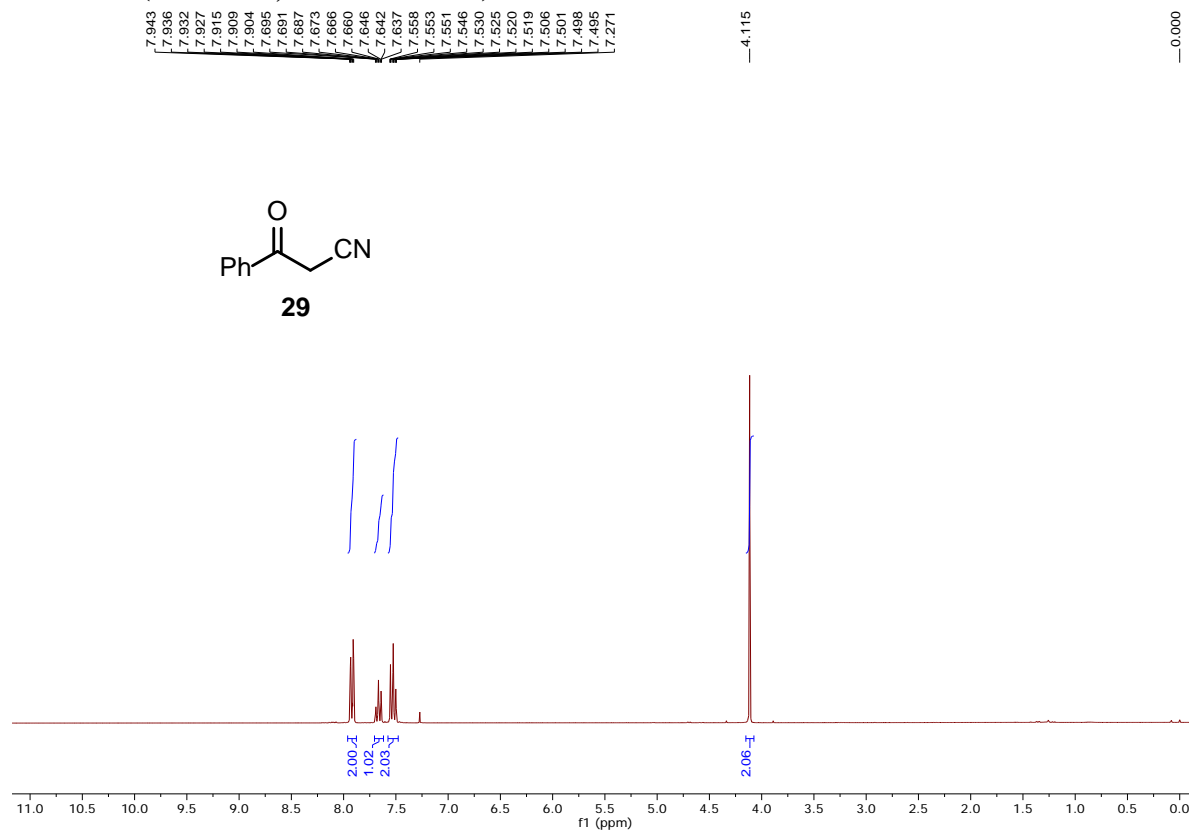

# <sup>13</sup>C NMR (75 MHz, Chloroform-*d*)

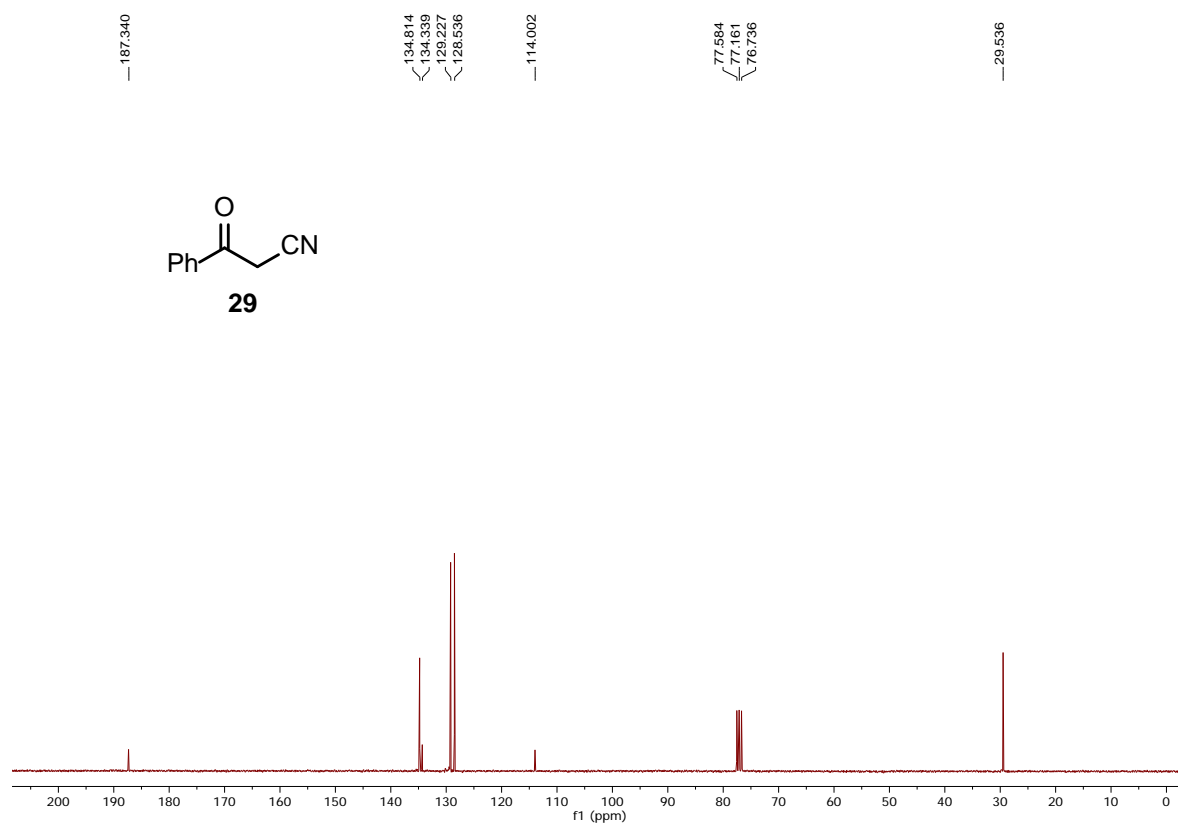

# <sup>1</sup>H NMR (300 MHz, Chloroform-*d*)

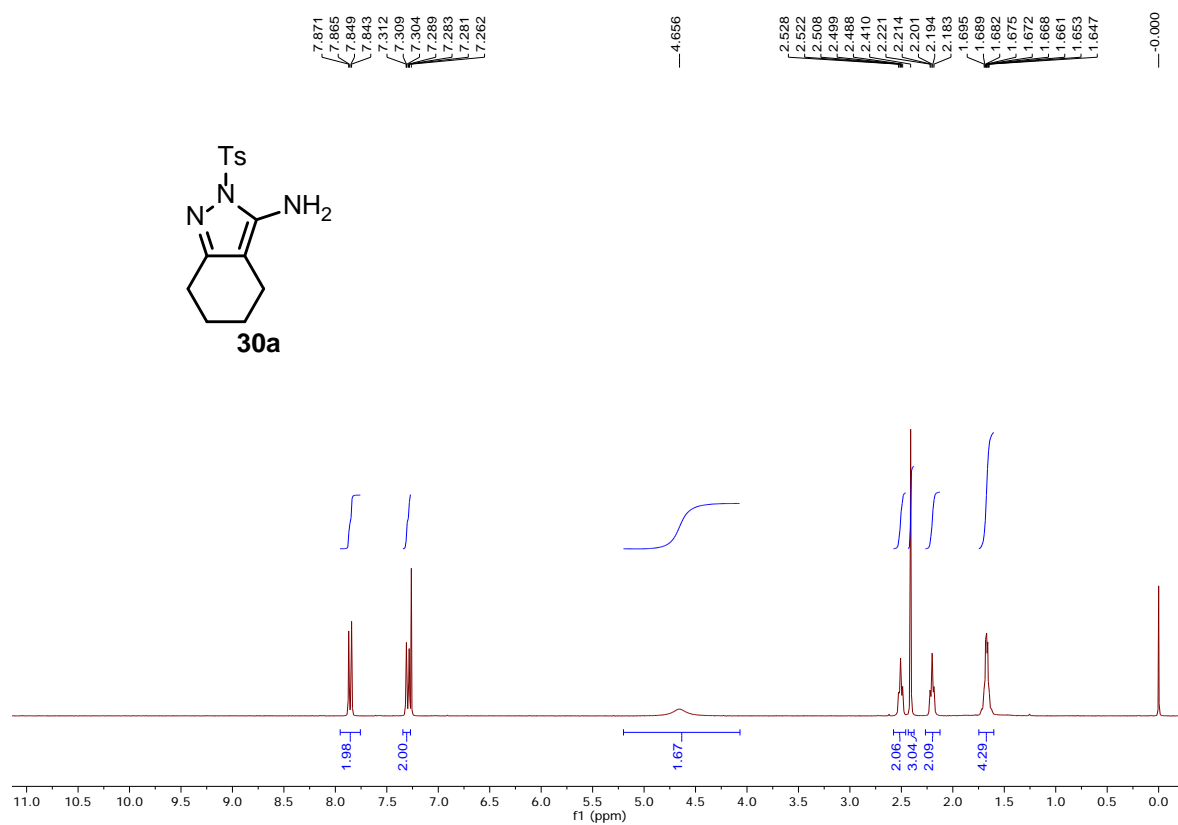

# <sup>13</sup>C NMR (75 MHz, Chloroform-*d*)

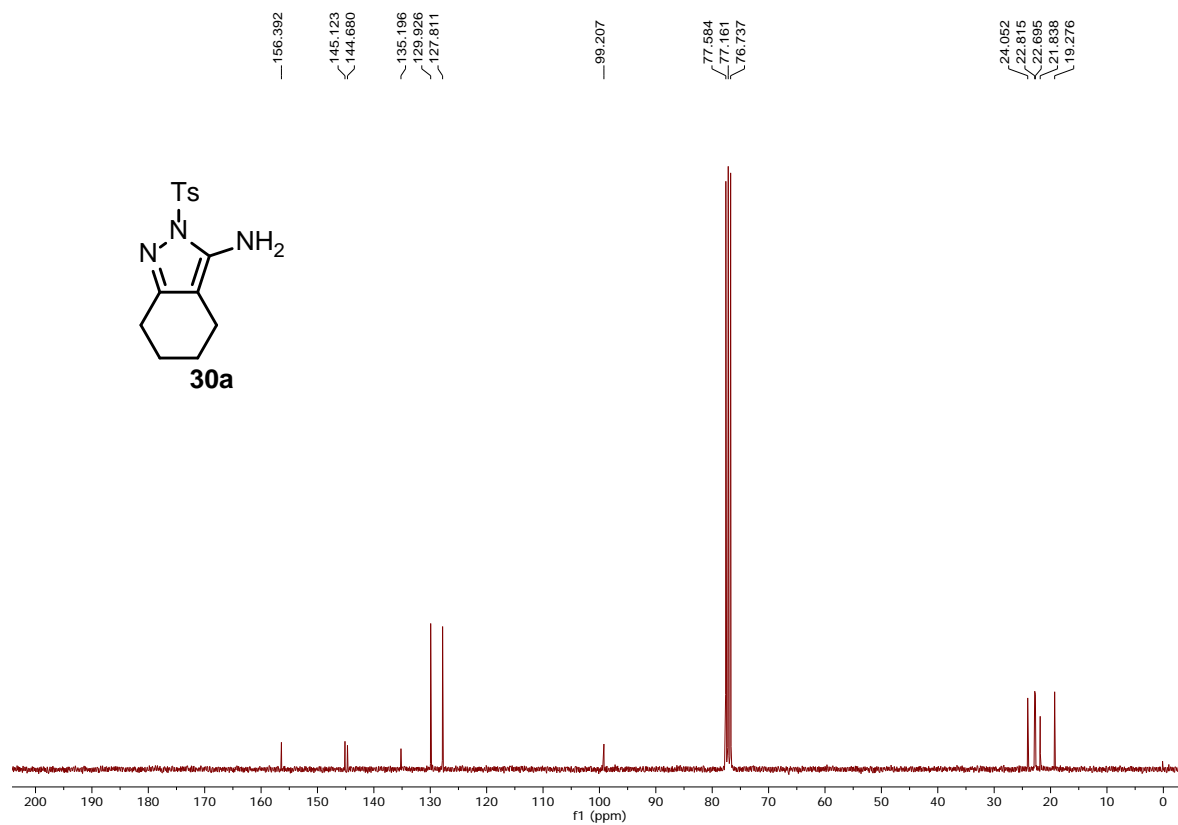

# <sup>1</sup>H NMR (300 MHz, Chloroform-*d*)

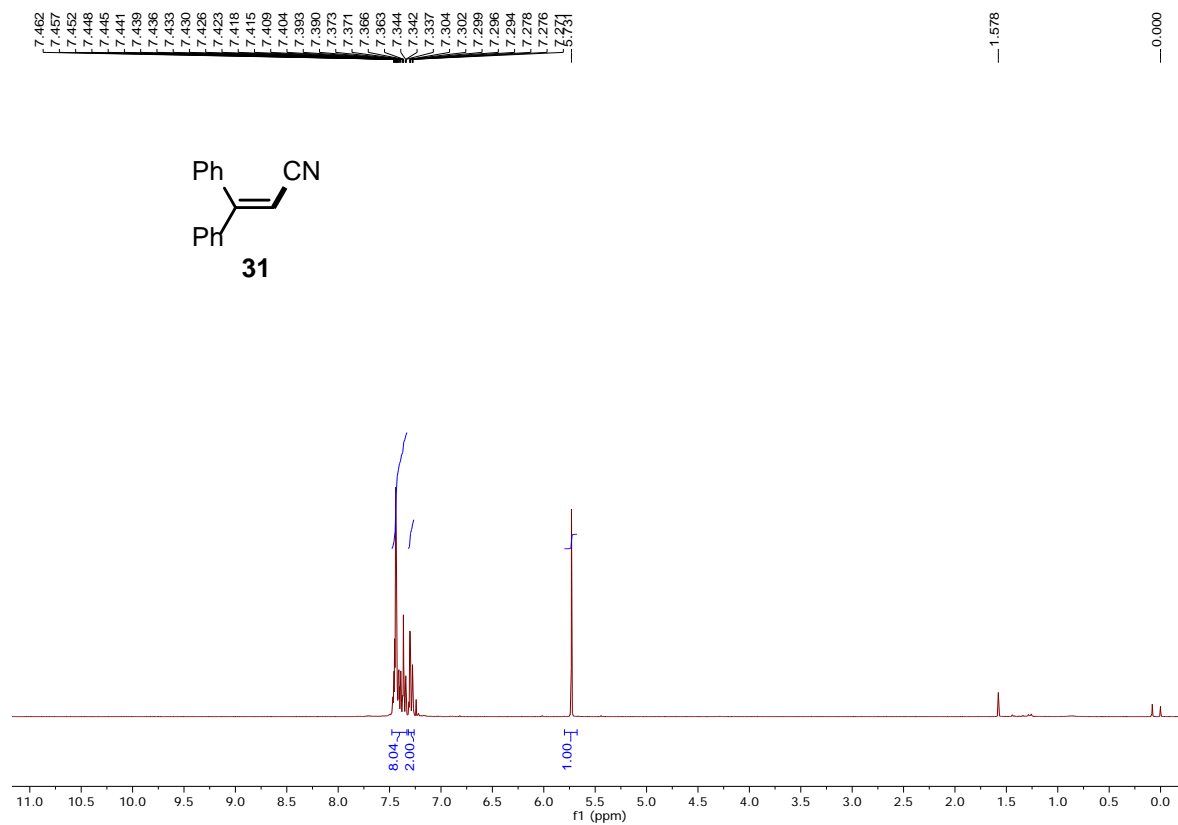

# <sup>13</sup>C NMR (75 MHz, Chloroform-*d*)

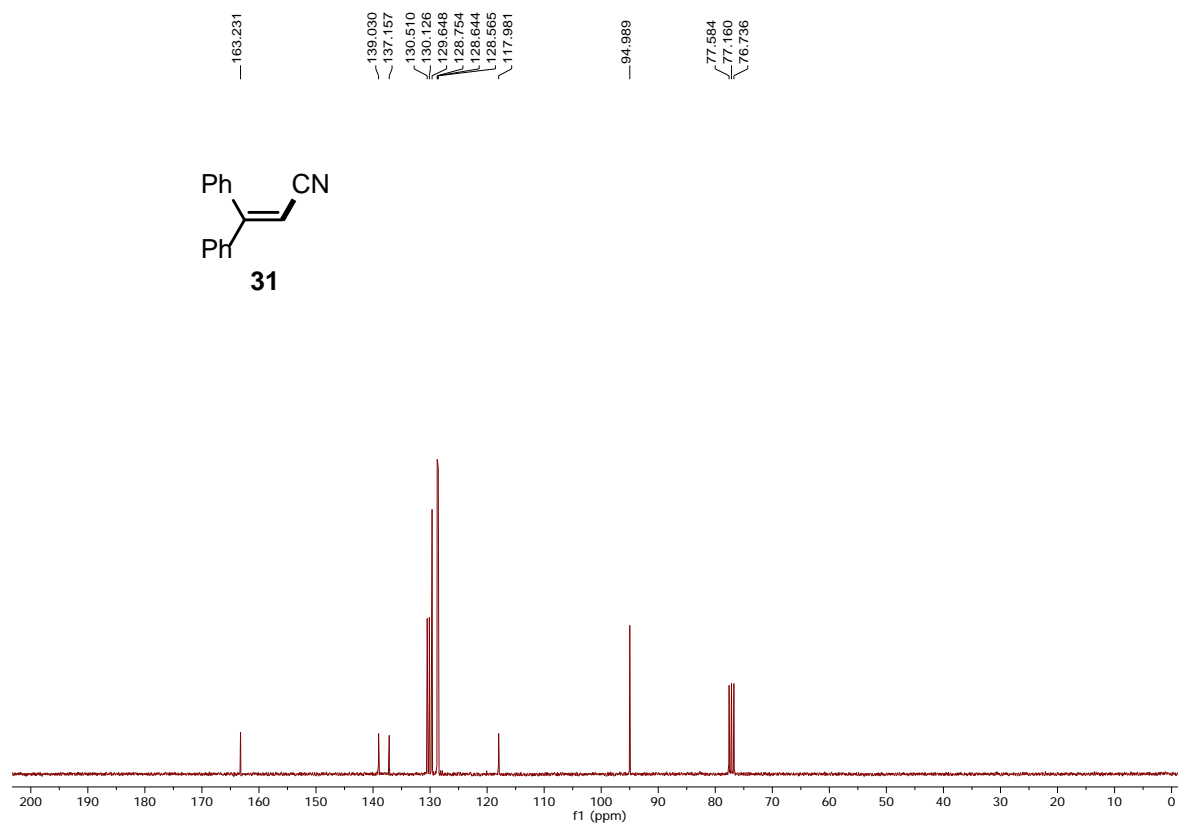

# <sup>1</sup>H NMR (300 MHz, Chloroform-*d*)

7.443  
7.424  
7.419  
7.414  
7.404  
7.396  
7.393  
7.389  
7.385  
7.382  
7.377  
7.367  
7.363  
7.359  
7.354  
7.351  
7.348  
7.344  
7.339  
7.338  
7.008  
7.003  
6.999  
6.993  
6.922  
6.916  
6.909  
6.903  
6.267  
6.263  
6.254

— 1.525

— 0.000

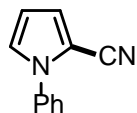

32

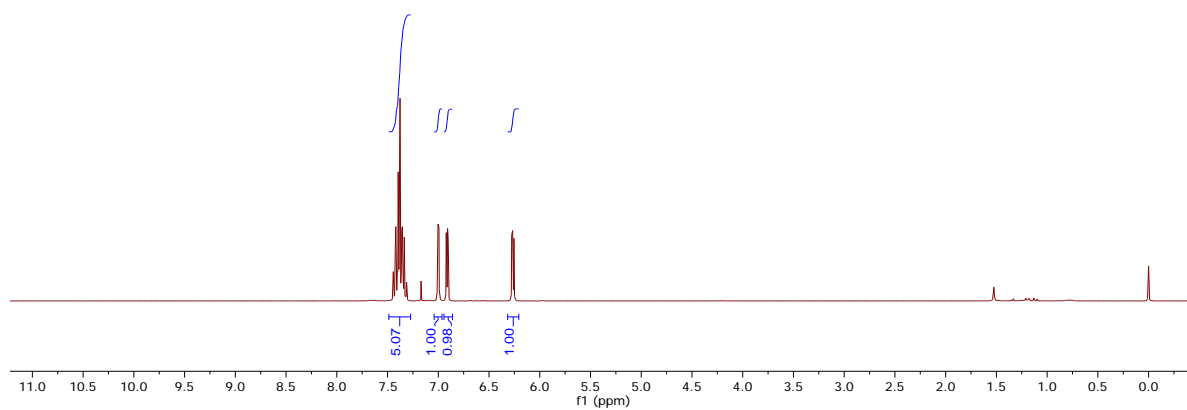

# <sup>13</sup>C NMR (75 MHz, Chloroform-*d*)

138.301  
128.777  
128.441  
127.062  
124.257  
122.340  
113.942  
110.745  
104.119

77.584  
77.161  
76.736

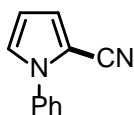

32

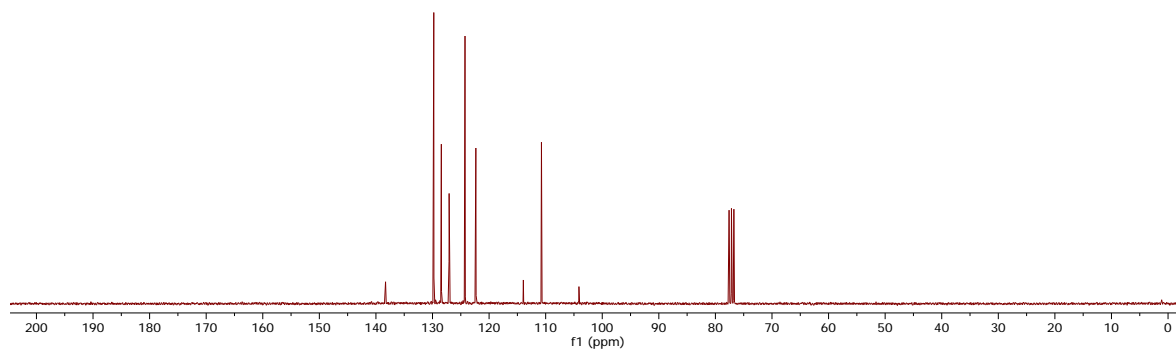



# <sup>1</sup>H NMR (300 MHz, Chloroform-*d*)

7.834  
7.832  
7.822  
7.816  
7.810  
7.804  
7.801  
7.791  
7.783  
7.600  
7.596  
7.593  
7.590  
7.579  
7.576  
7.571  
7.565  
7.554  
7.548  
7.544  
7.539  
7.523  
7.520  
7.513  
7.508  
7.504  
7.501  
7.489  
7.481  
7.469  
7.466  
7.460  
7.476  
7.474  
7.471  
7.459  
7.453  
7.449  
7.449  
7.365  
7.362  
7.350  
7.341  
7.339  
7.331  
7.328  
7.319  
7.245

— 1.621

— 0.000

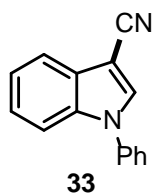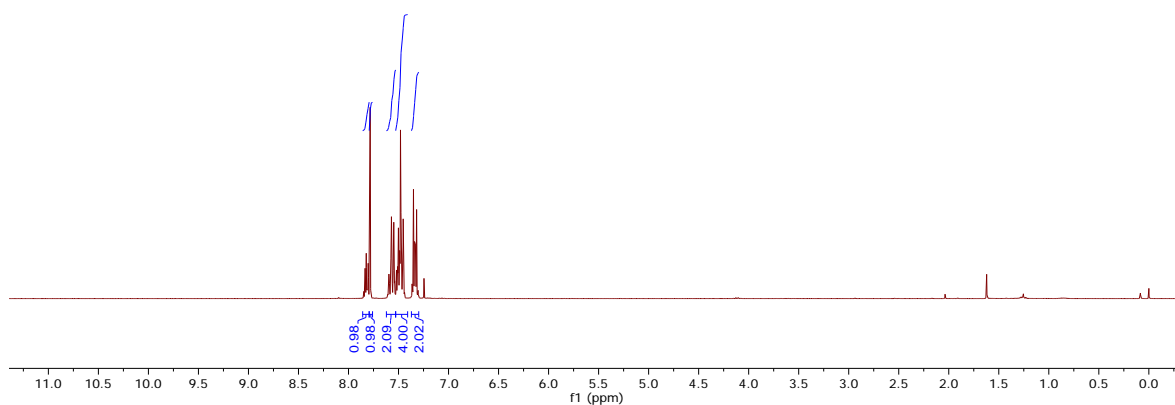

# <sup>13</sup>C NMR (75 MHz, Chloroform-*d*)

137.895  
135.867  
134.728  
130.128  
128.480  
128.041  
124.950  
124.632  
122.895  
120.110  
115.620  
111.630

— 88.191

77.584  
77.160  
76.737

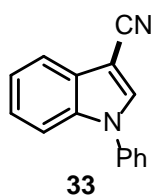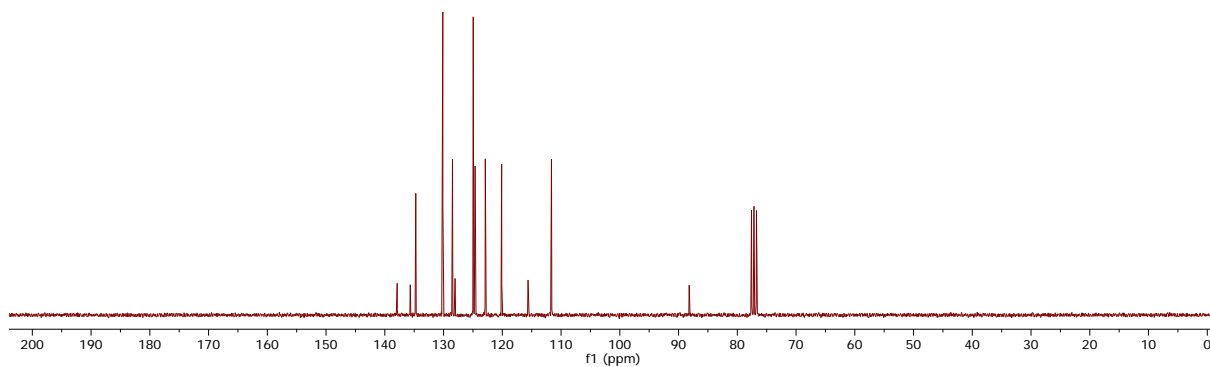

# <sup>1</sup>H NMR (300 MHz, Chloroform-*d*)

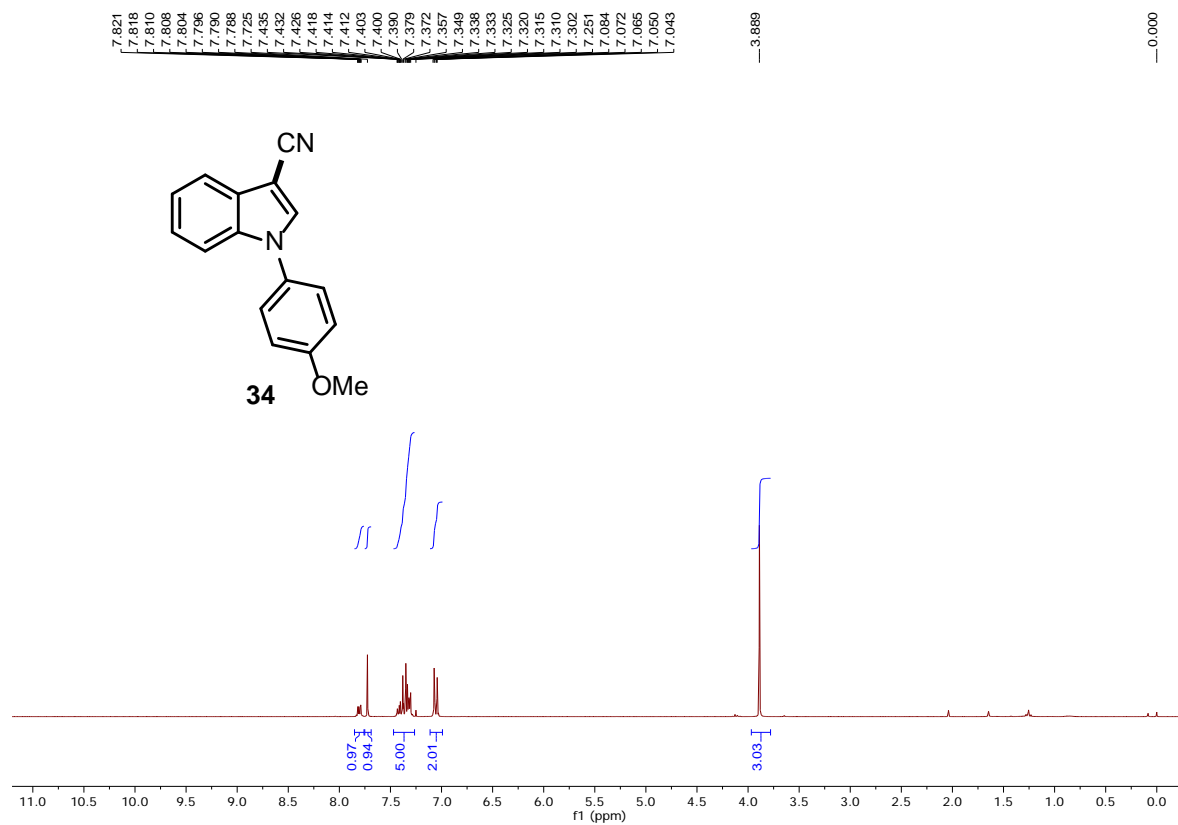

# <sup>13</sup>C NMR (75 MHz, Chloroform-*d*)

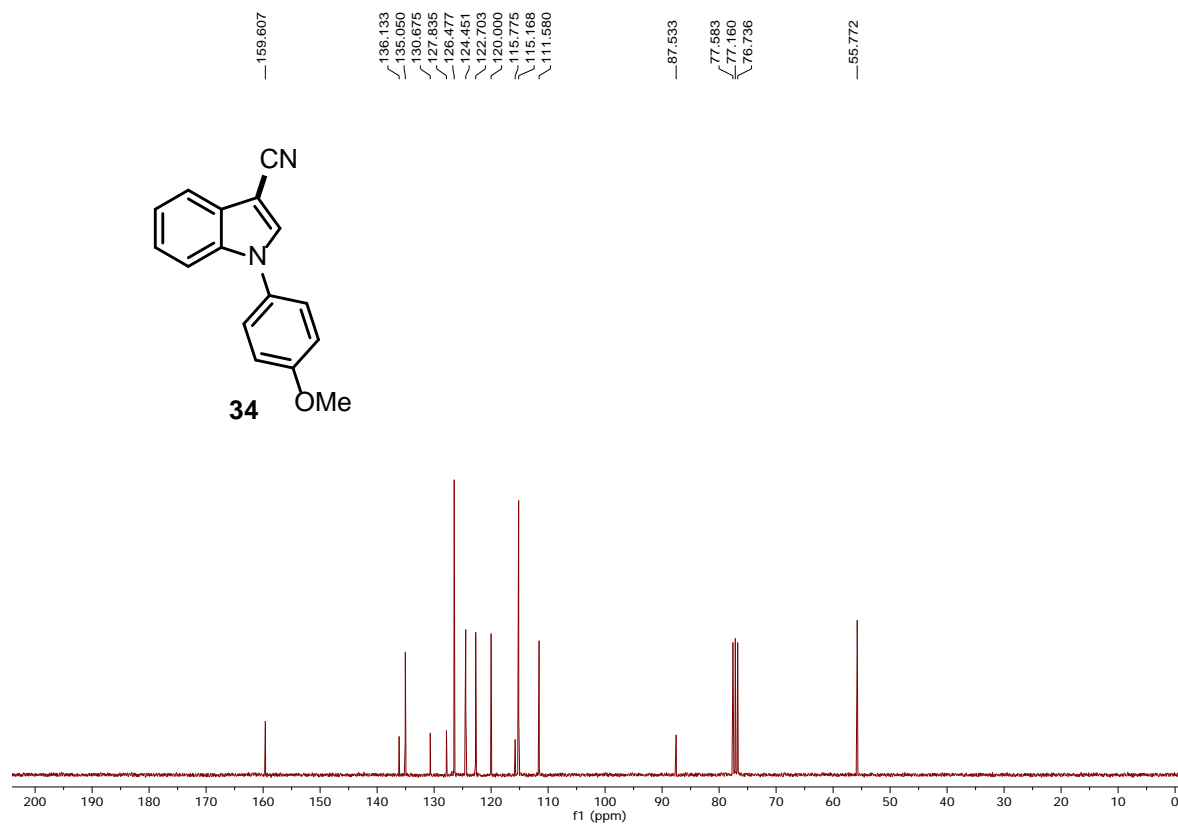

# <sup>1</sup>H NMR (300 MHz, Chloroform-*d*)

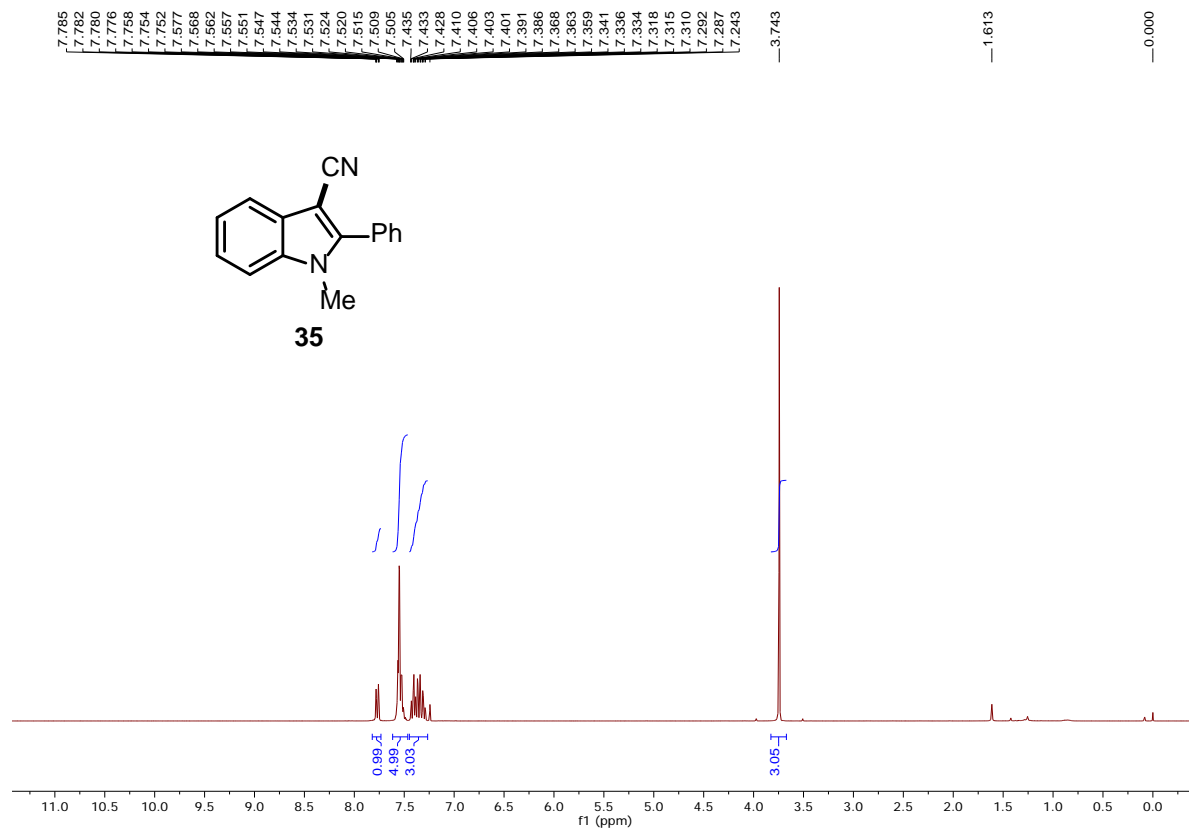

# <sup>13</sup>C NMR (75 MHz, Chloroform-*d*)

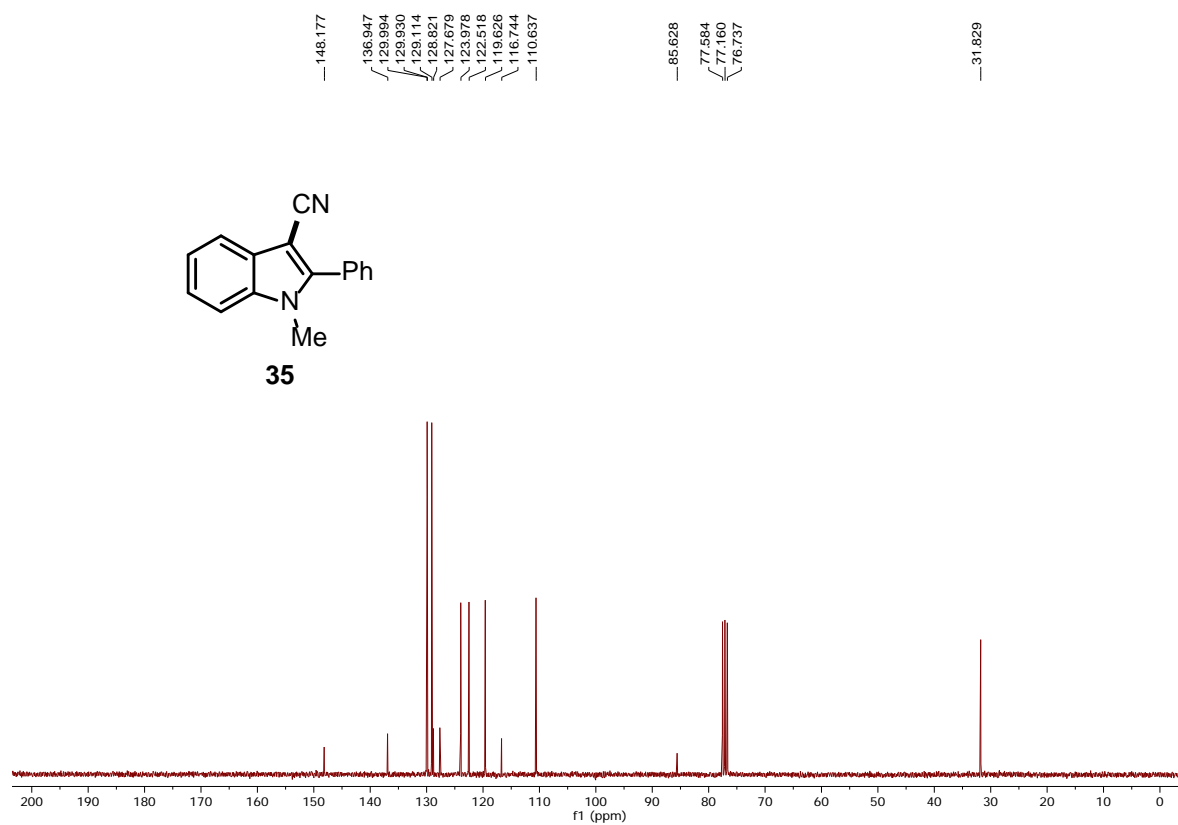

**<sup>1</sup>H NMR (300 MHz, Chloroform-*d*)**

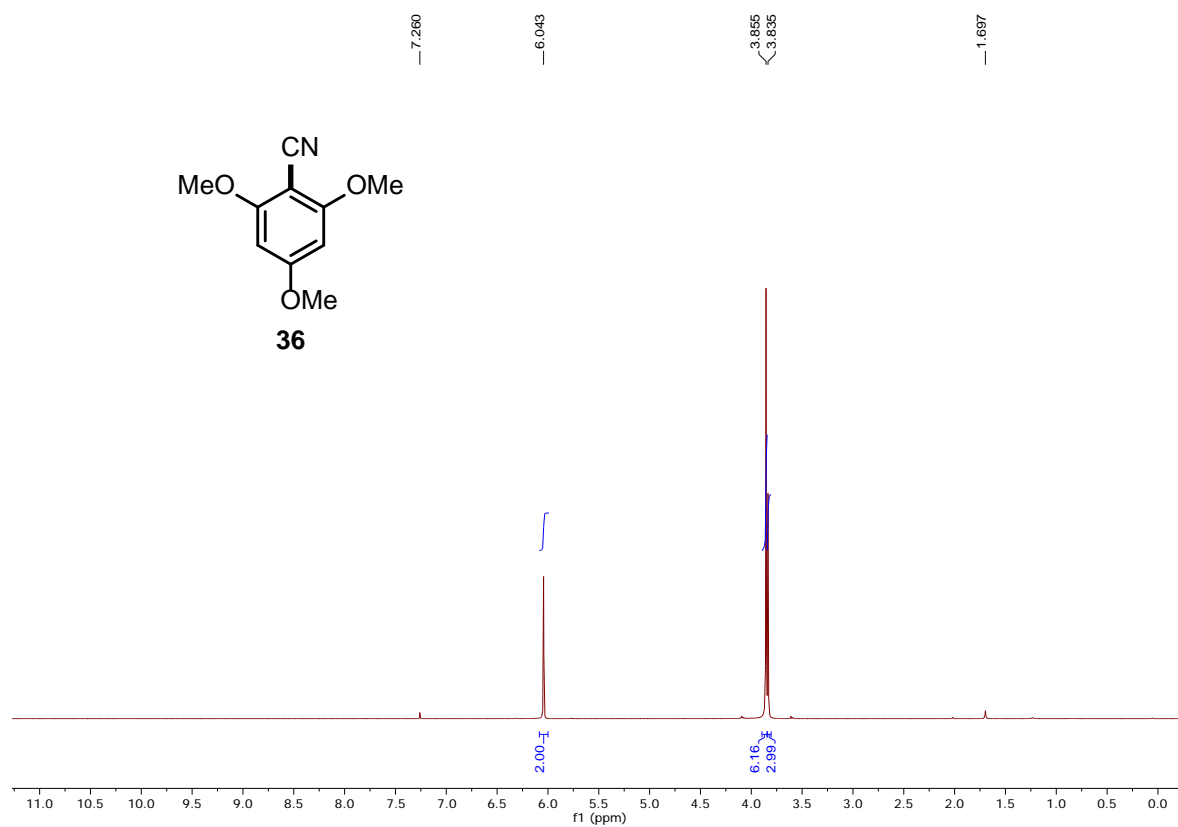

**<sup>13</sup>C NMR (75 MHz, Chloroform-*d*)**

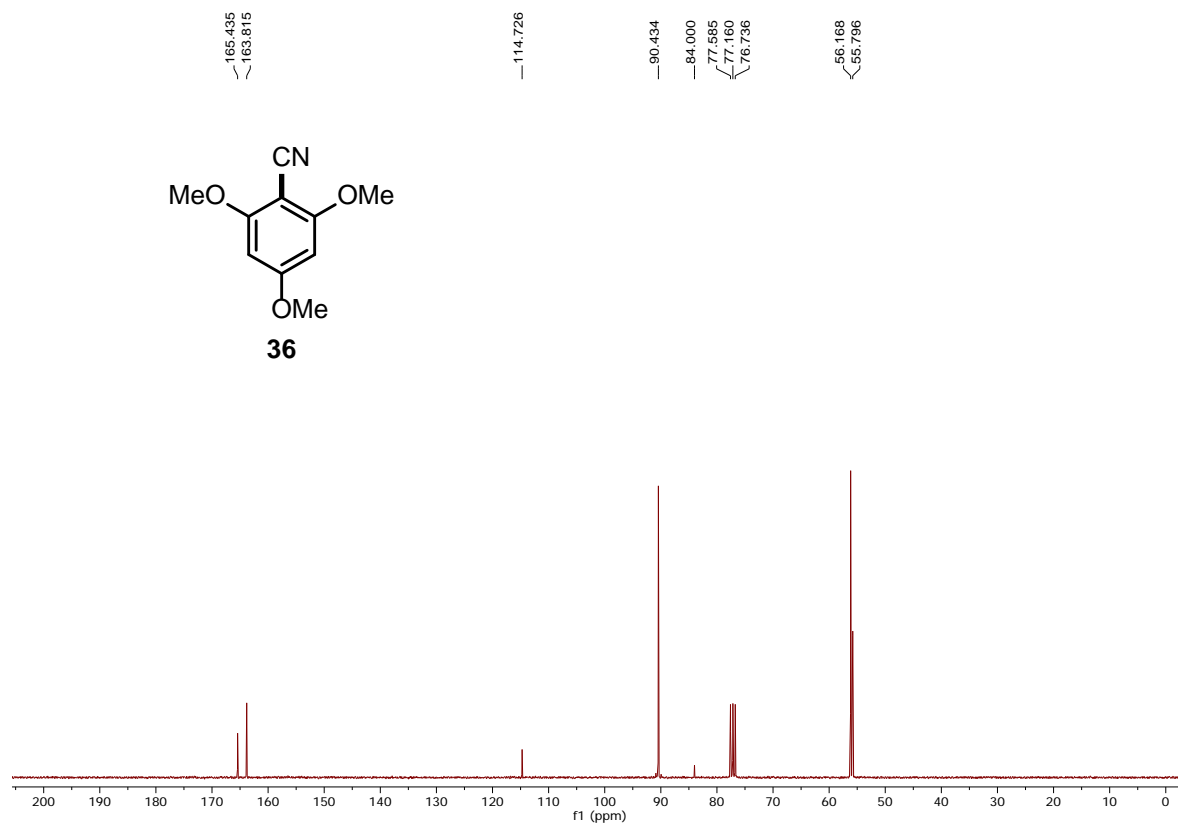

# <sup>1</sup>H NMR (300 MHz, Chloroform-*d*)

7.425  
7.418  
7.402  
7.395  
7.357  
7.336  
7.330  
7.326  
7.312  
7.306  
7.304  
7.253  
7.183  
7.179  
7.162  
7.157  
7.153  
7.151  
7.134  
7.129  
7.125  
6.971  
6.964  
6.948  
6.941

—0.000

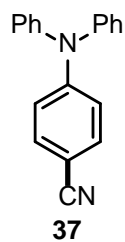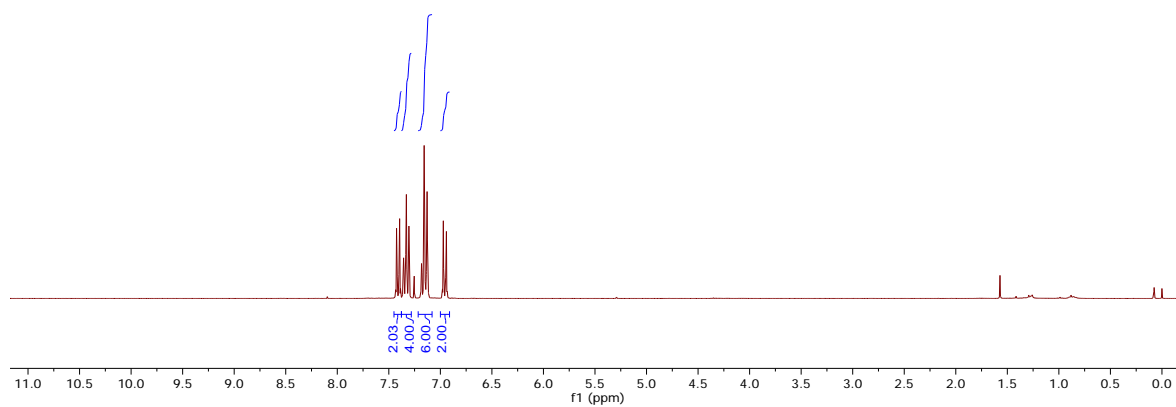

# <sup>13</sup>C NMR (75 MHz, Chloroform-*d*)

151.723  
146.088  
133.304  
128.911  
126.295  
125.269  
119.821  
102.619  
77.584  
77.161  
76.737

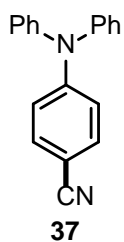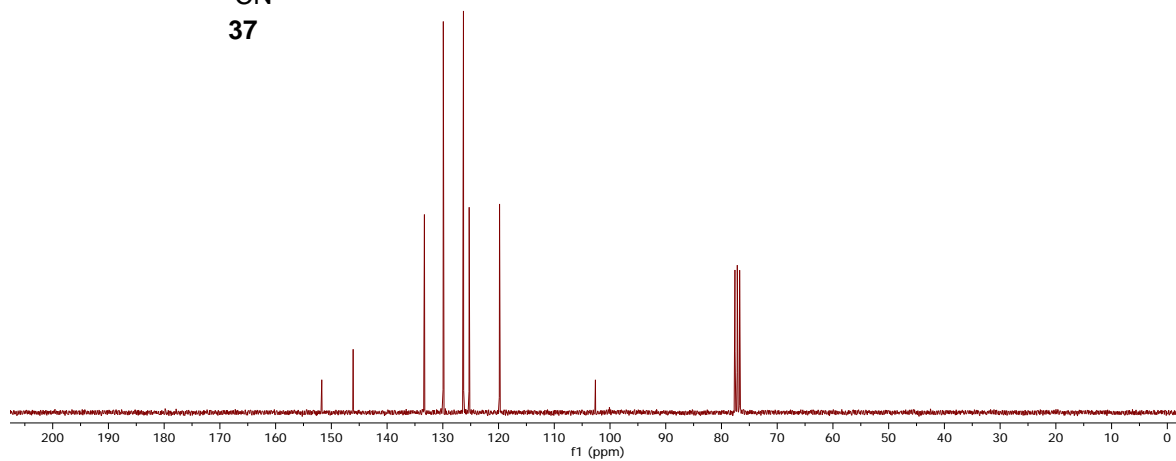

# <sup>1</sup>H NMR (400 MHz, Chloroform-*d*)

8.954  
8.827  
8.663  
8.365  
8.342  
8.060  
8.038  
8.029  
8.007  
7.985  
7.651  
7.635  
7.632  
7.628  
7.613  
7.530  
7.514  
7.499  
7.494  
7.489  
7.483  
7.478  
7.470  
7.461  
7.454  
7.260

-1.562

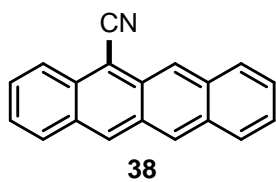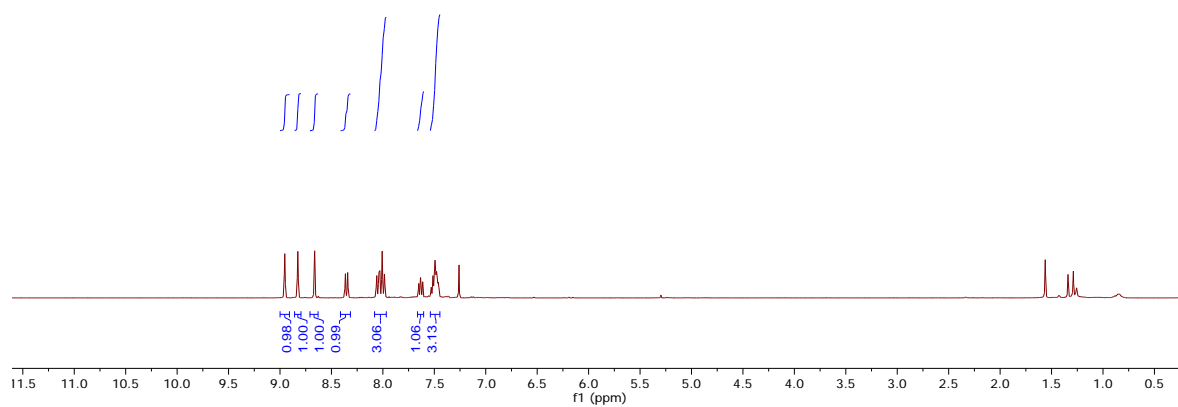

# <sup>13</sup>C NMR (101 MHz, Chloroform-*d*)

134.468  
133.462  
133.431  
131.983  
130.340  
130.299  
129.287  
128.905  
128.540  
128.318  
128.006  
127.179  
126.392  
125.954  
125.431  
123.921  
117.937

-104.895

77.478  
77.161  
76.843

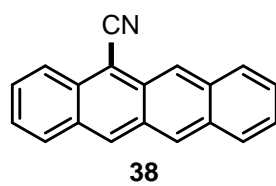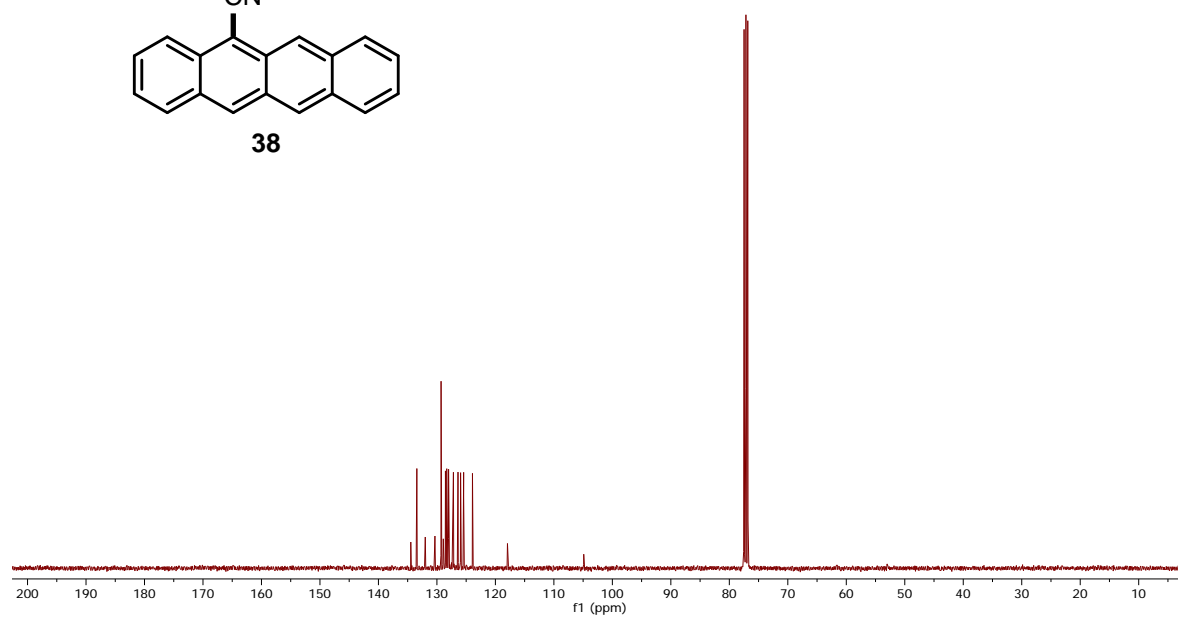

# <sup>1</sup>H NMR (300 MHz, Methylene Chloride-d<sub>2</sub>)

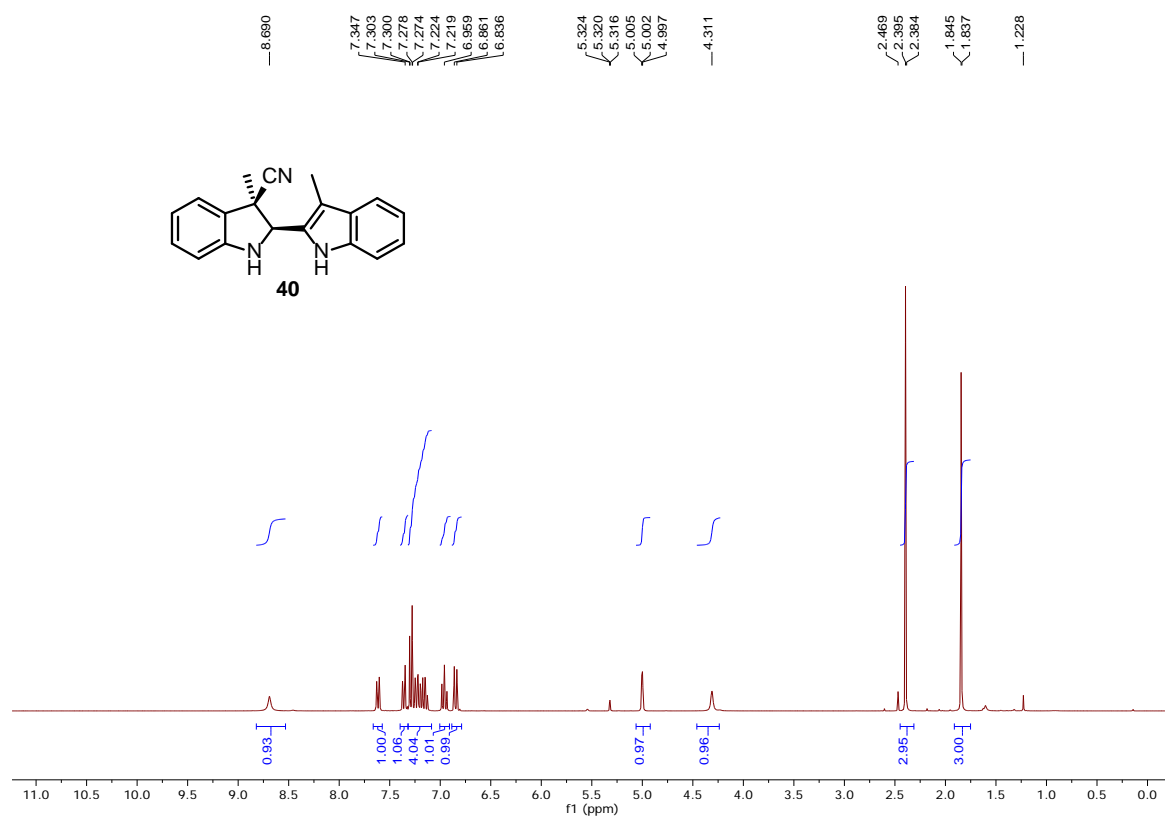

# <sup>13</sup>C NMR (75 MHz, Methylene Chloride-d<sub>2</sub>)

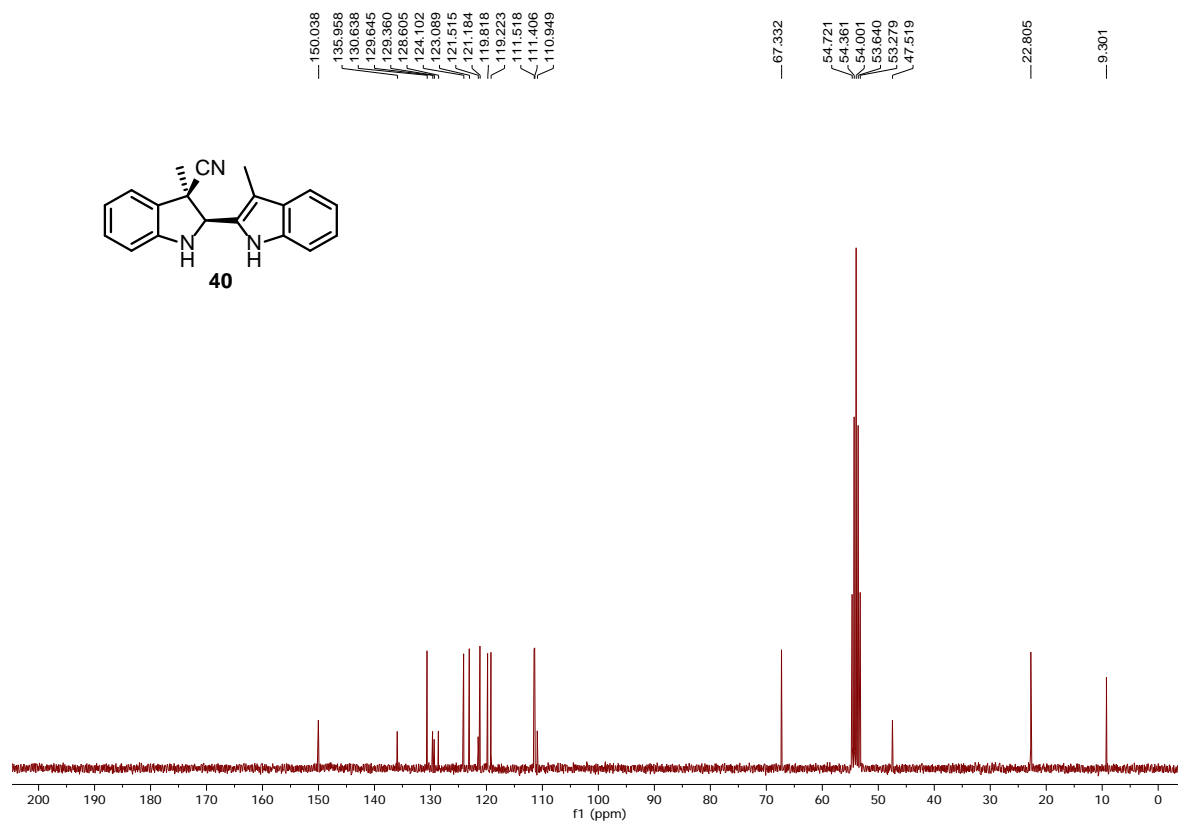

# <sup>1</sup>H NMR (400 MHz, Chloroform-*d*)

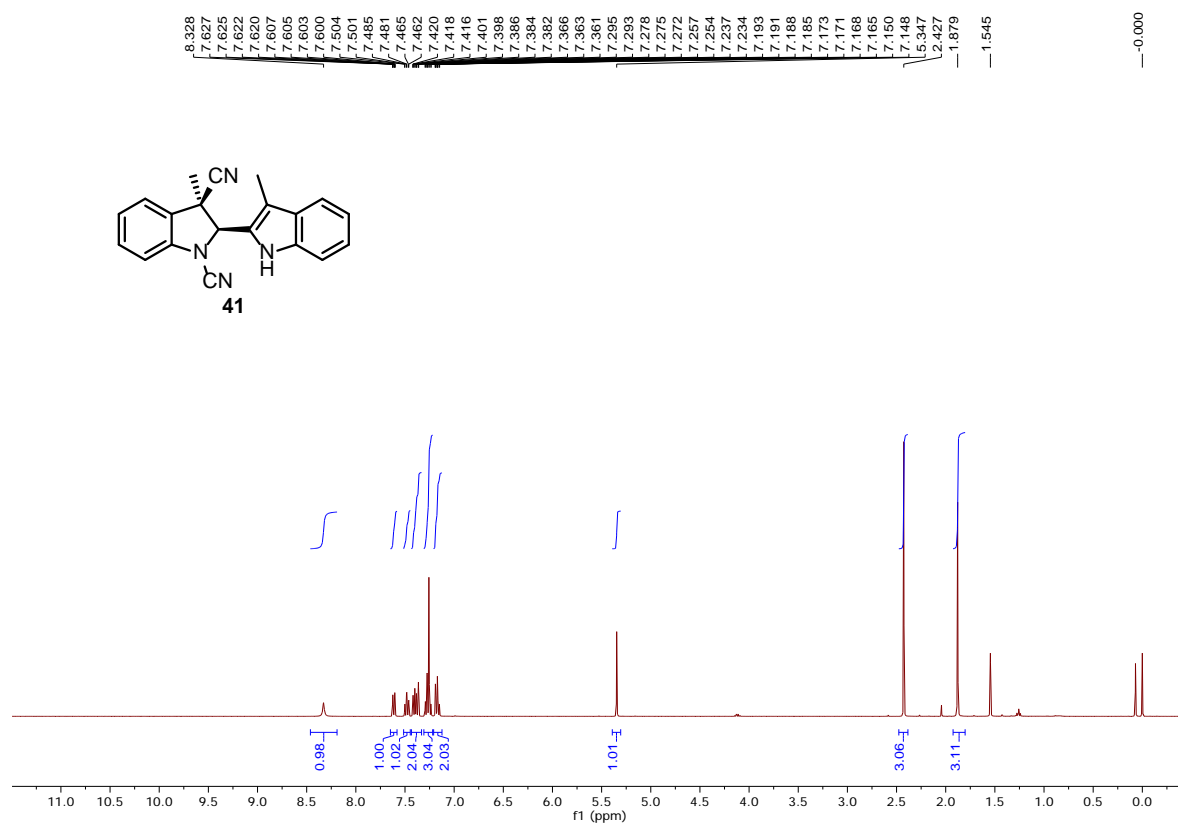

# <sup>13</sup>C NMR (101 MHz, Chloroform-*d*)

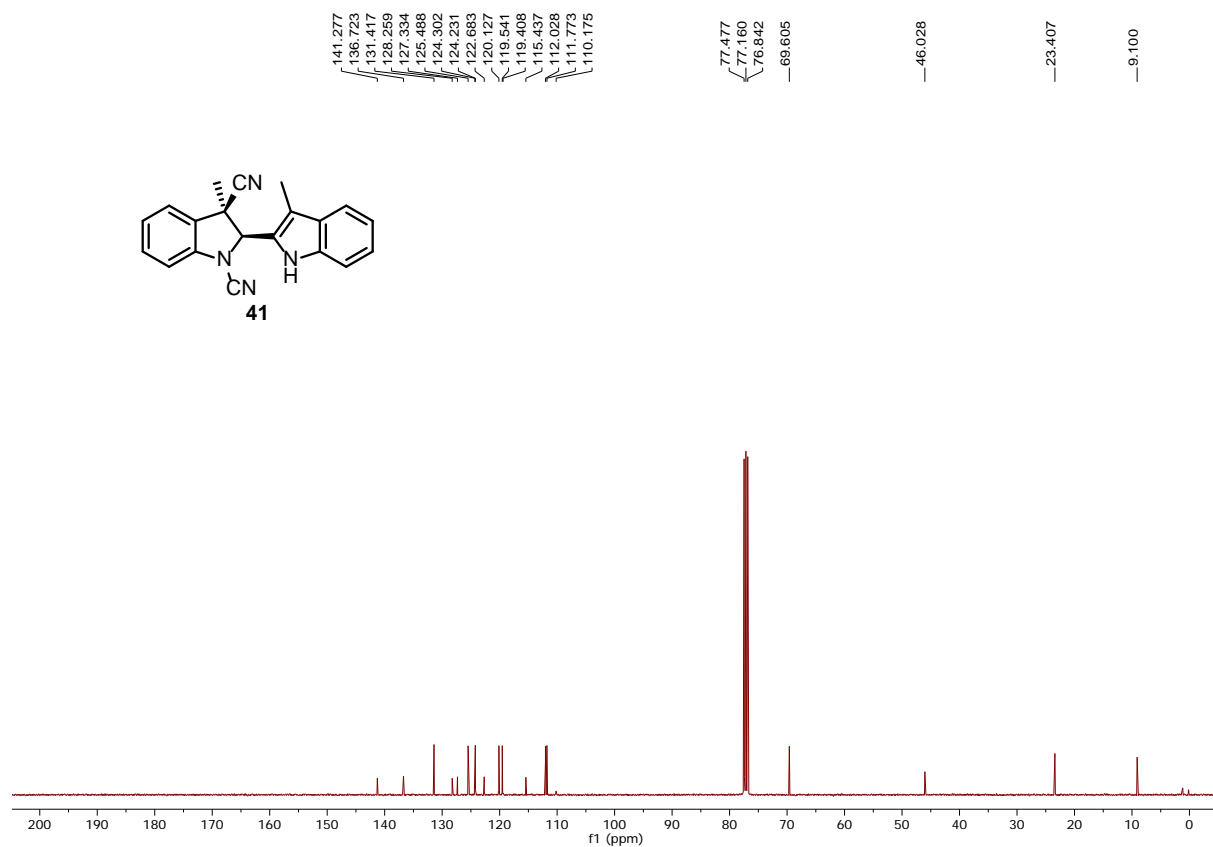



# <sup>1</sup>H NMR (400 MHz, Chloroform-*d*)

7.650  
7.648  
7.646  
7.630  
7.628  
7.626  
7.567  
7.565  
7.562  
7.548  
7.546  
7.544  
7.474  
7.471  
7.455  
7.452  
7.436  
7.433  
7.333  
7.330  
7.314  
7.311  
7.285  
7.292  
7.273  
3.042  
3.011  
3.008  
3.005  
3.002  
2.999  
2.996  
2.893  
2.879  
2.860  
2.846  
2.841  
2.835  
2.827  
2.812  
2.808  
2.801  
2.334  
2.325  
2.286  
2.271  
2.106  
2.098  
2.073  
2.064  
2.028  
1.987  
1.958  
1.956  
1.952  
1.949  
1.942  
1.906  
1.576  
1.522  
1.521  
1.489  
1.465  
1.281  
1.257  
1.246  
1.223  
1.214  
0.000

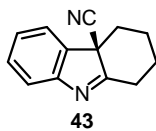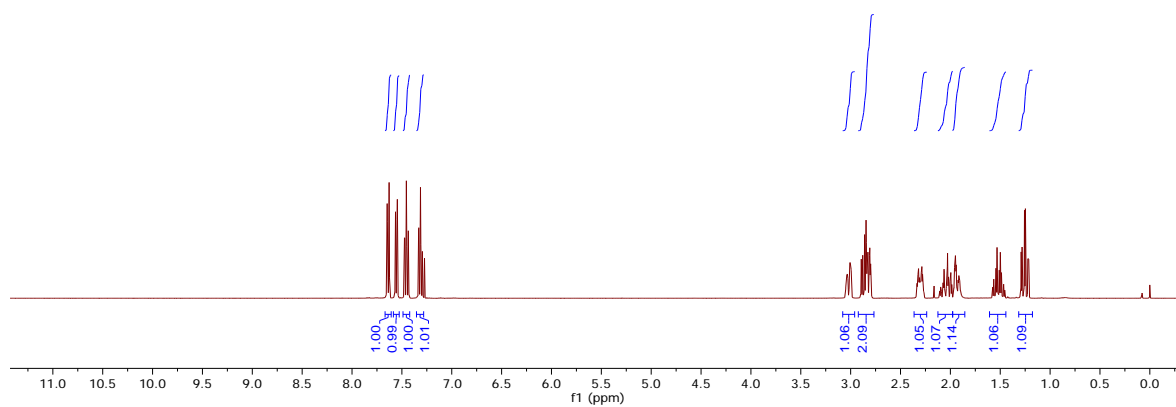

# <sup>13</sup>C NMR (101 MHz, Chloroform-*d*)

178.562  
155.129  
137.158  
128.997  
126.598  
122.674  
121.274  
117.566  
77.478  
77.161  
76.843  
51.877  
39.171  
30.173  
28.368  
22.421

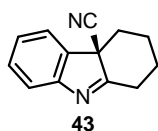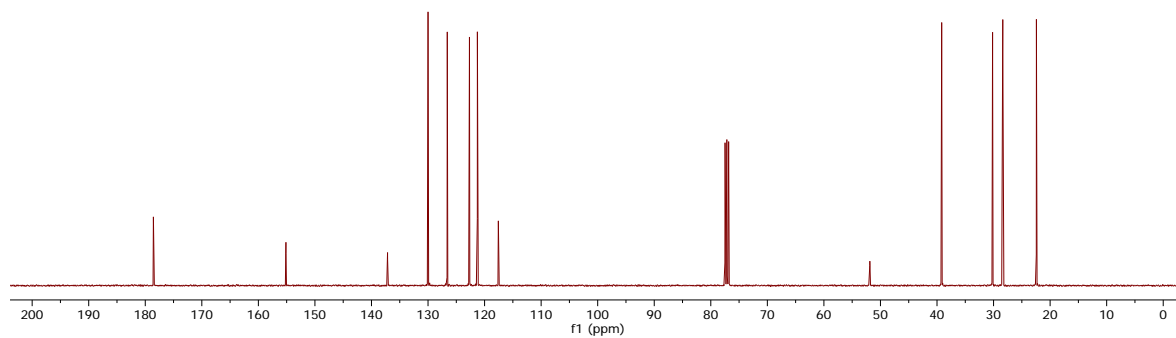

# <sup>1</sup>H NMR (400 MHz, Chloroform-*d*)

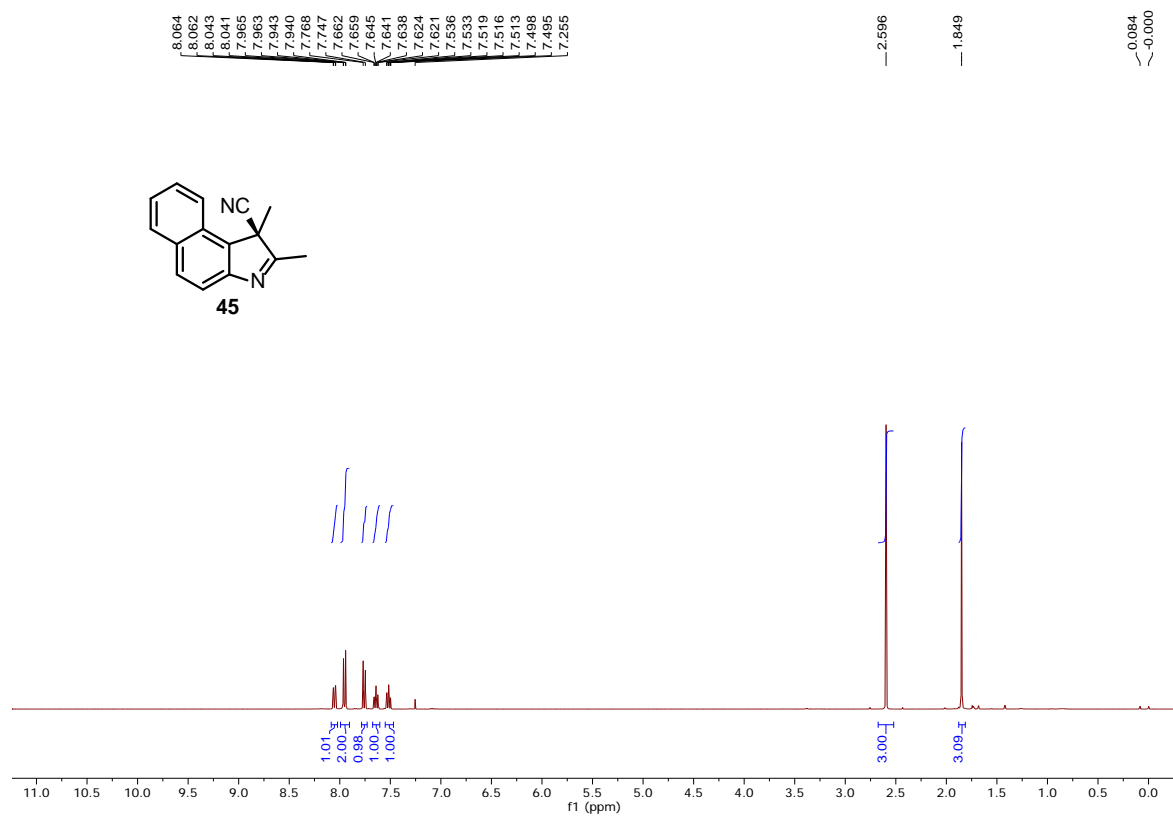

# <sup>13</sup>C NMR (101 MHz, Chloroform-*d*)

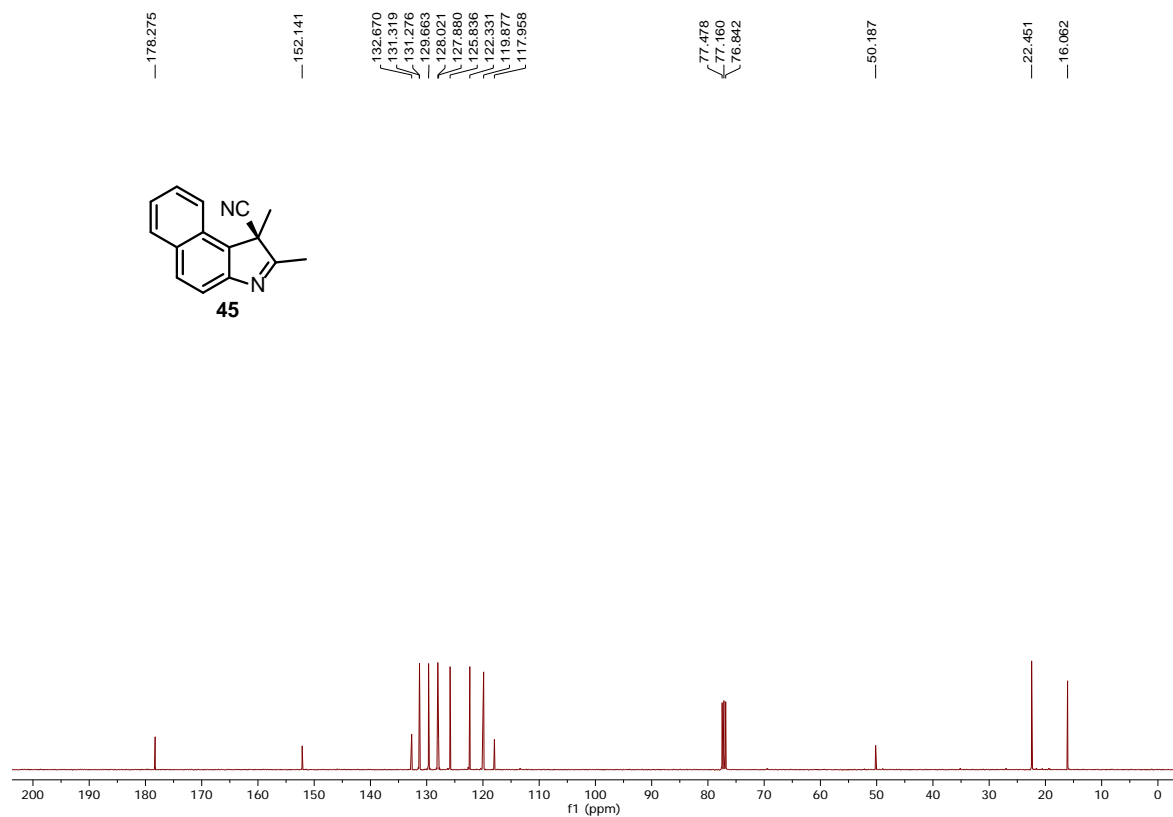

# <sup>1</sup>H NMR (400 MHz, Chloroform-*d*)

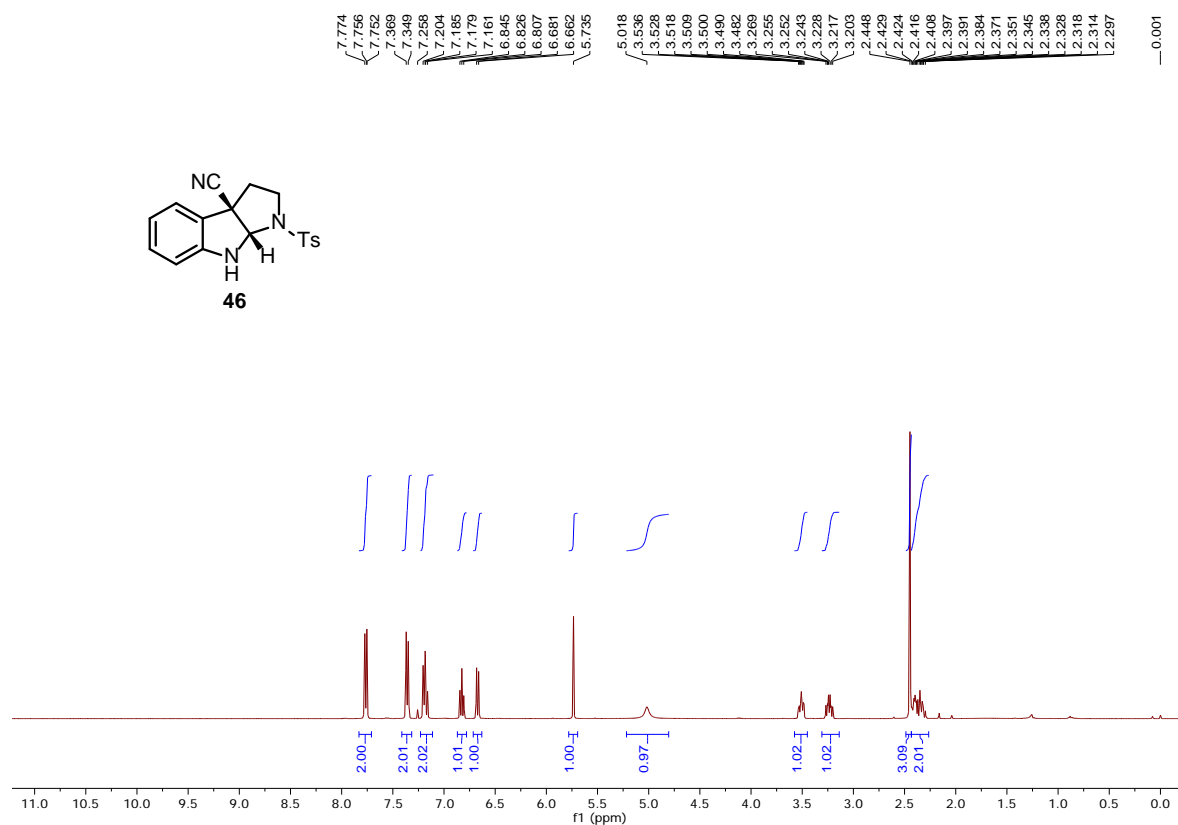

# <sup>13</sup>C NMR (101 MHz, Chloroform-*d*)

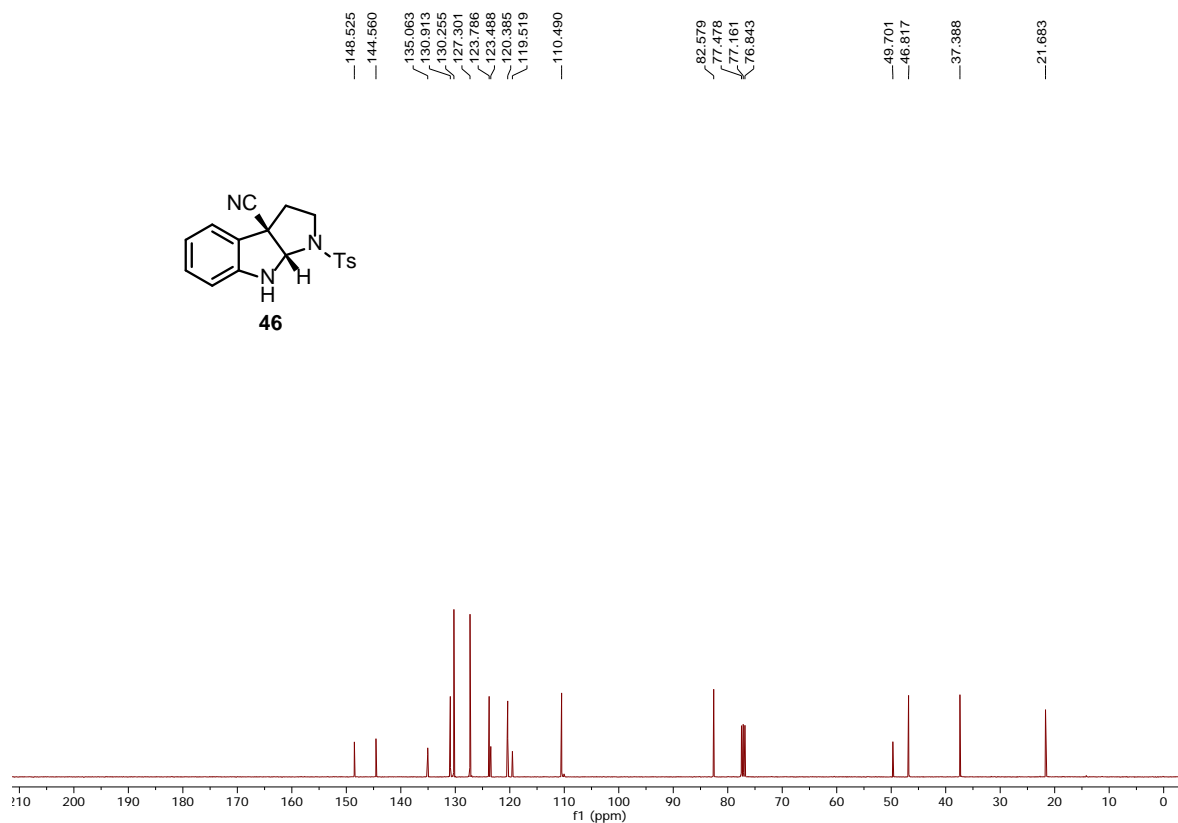

# <sup>1</sup>H NMR (400 MHz, Chloroform-*d*)

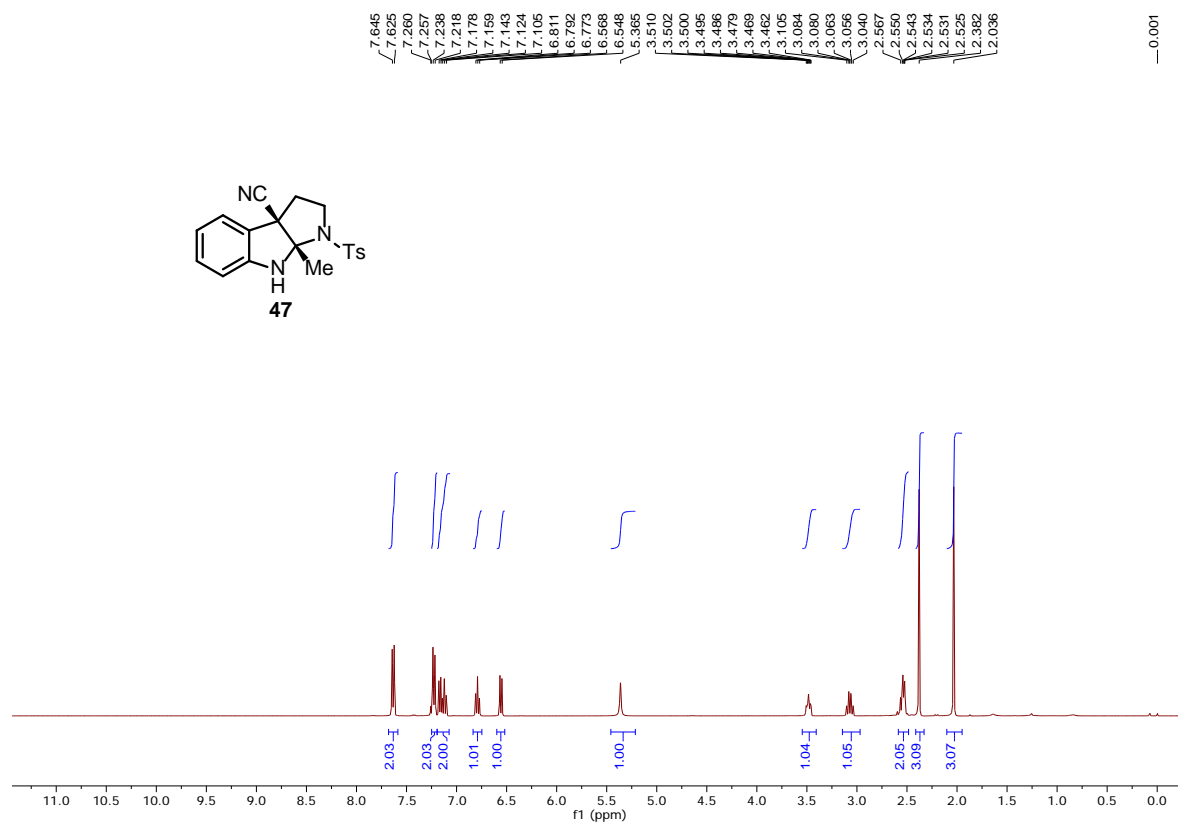

# <sup>13</sup>C NMR (101 MHz, Chloroform-*d*)

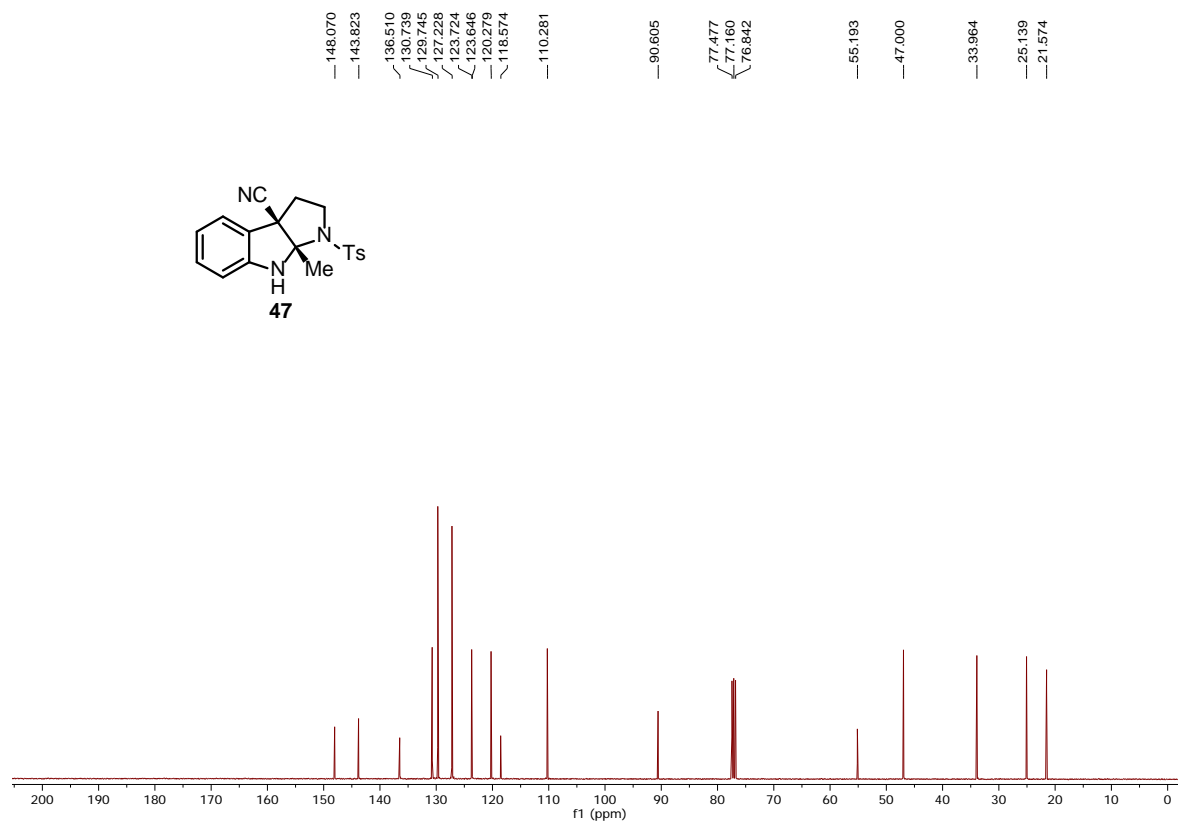

# <sup>1</sup>H NMR (300 MHz, Chloroform-*d*)

7.813  
7.807  
7.792  
7.785  
7.778  
7.410  
7.407  
7.405  
7.401  
7.387  
7.381  
7.378  
7.260  
7.232  
7.228  
7.206  
7.202  
7.180  
7.176  
7.127  
7.125  
7.123  
7.121  
7.102  
7.100  
7.098  
7.096  
6.745  
6.742  
6.721  
6.717  
6.696  
6.692  
6.664  
6.643  
6.638  
5.845  
3.683  
3.678  
3.675  
3.670  
3.668  
3.663  
3.651  
3.645  
3.643  
3.159  
3.140  
3.122  
3.117  
3.104  
3.098  
3.080  
3.062  
3.009  
2.466  
2.213  
2.202  
2.179  
2.173  
2.171  
2.162  
2.160  
2.159  
1.897  
1.872  
1.860  
1.855  
1.836  
1.830  
1.818  
1.794  
0.000

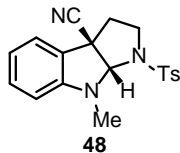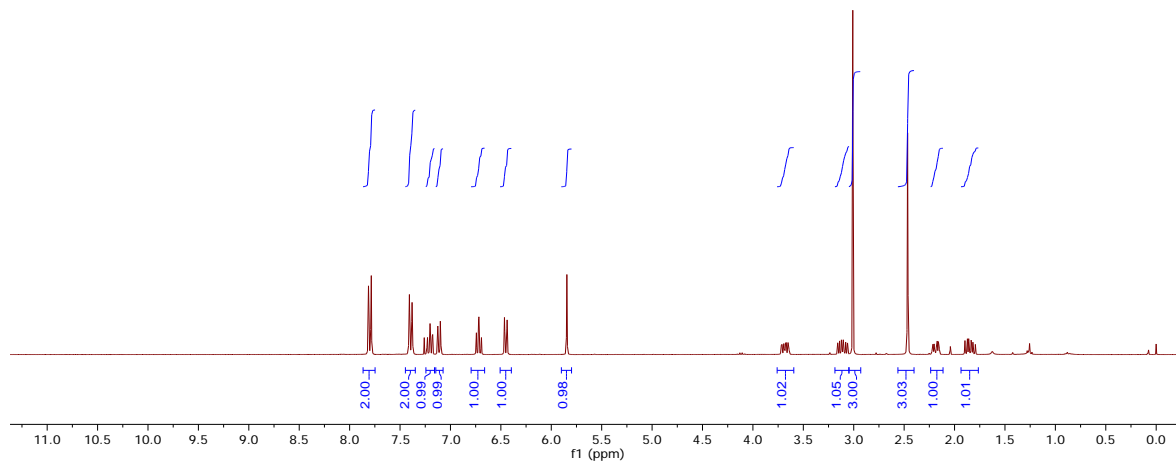

# <sup>13</sup>C NMR (75 MHz, Chloroform-*d*)

149.916  
144.750  
135.503  
131.008  
130.452  
127.378  
123.686  
123.486  
119.782  
118.647  
106.871  
88.737  
77.583  
77.160  
76.737  
48.682  
47.422  
39.074  
31.138  
21.739

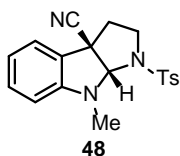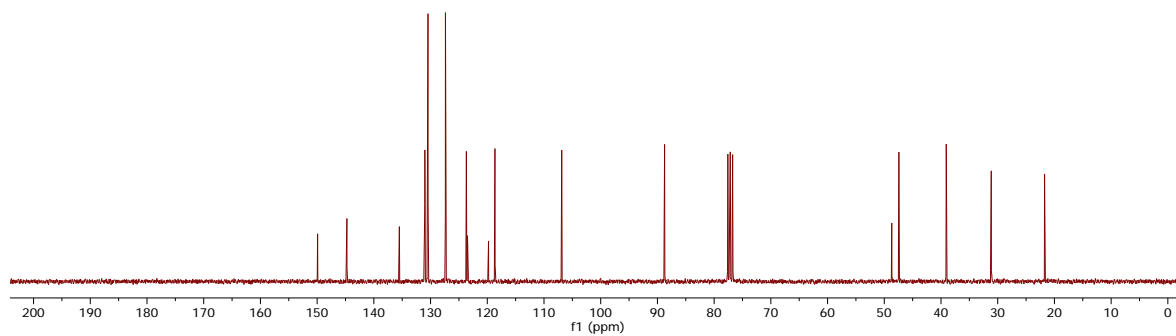

# <sup>1</sup>H NMR (400 MHz, DMSO-d<sub>6</sub>, 100 °C)

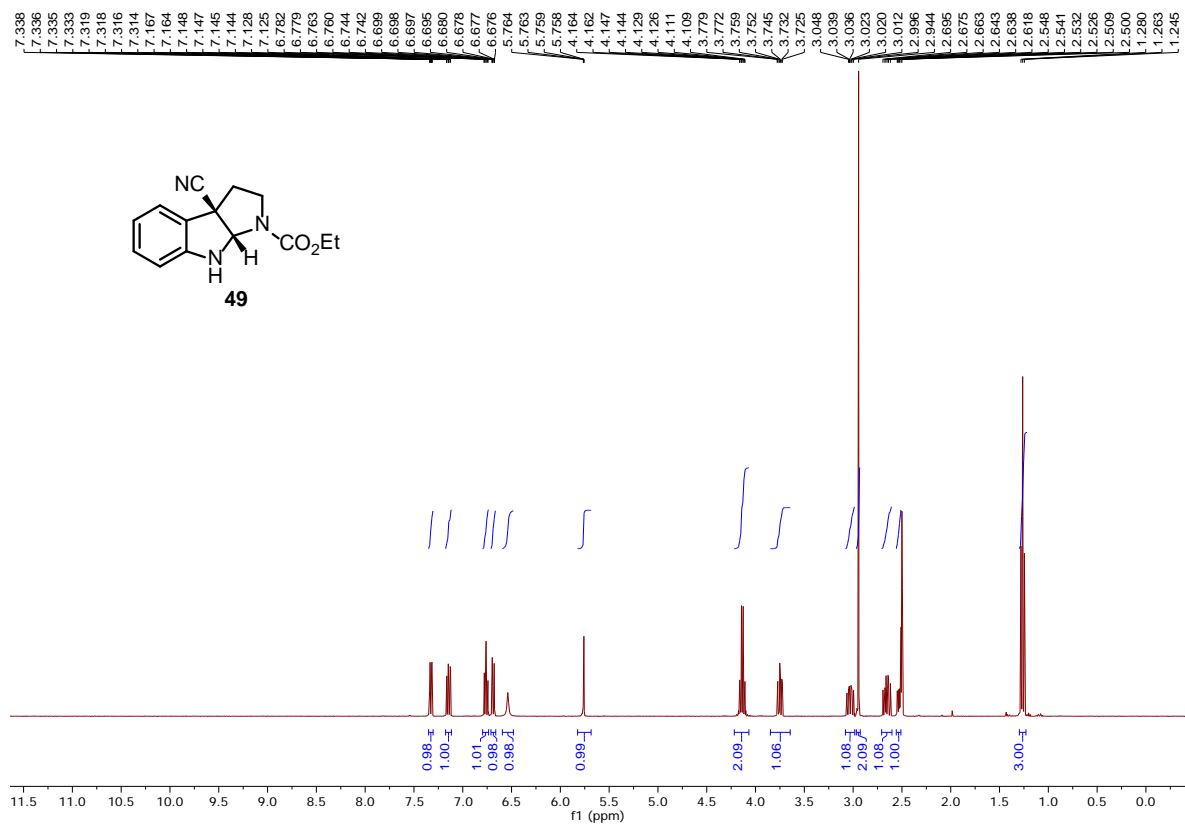

# <sup>13</sup>C NMR (101 MHz, DMSO-d<sub>6</sub>, 100 °C)

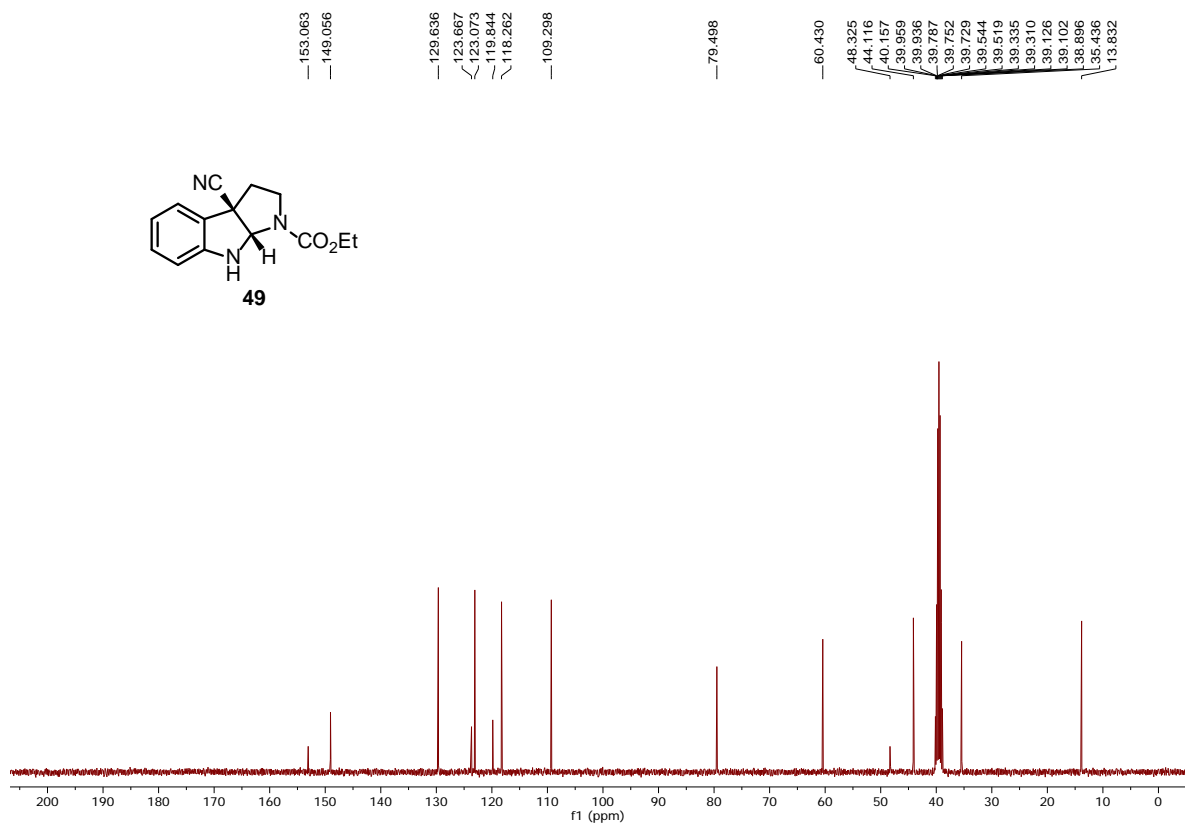

# <sup>1</sup>H NMR (400 MHz, DMSO-d<sub>6</sub>, 100 °C)

7.384  
7.381  
7.366  
7.362  
7.320  
7.317  
7.313  
7.301  
7.298  
7.296  
7.285  
7.280  
7.245  
7.242  
7.230  
7.225  
7.215  
7.210  
7.108  
7.103  
7.087  
7.083  
7.067  
7.064  
6.767  
6.764  
6.748  
6.746  
6.729  
6.727  
6.268  
6.248  
4.910  
4.867  
4.696  
4.653  
4.052  
4.044  
4.040  
4.035  
4.022  
4.017  
4.005  
3.999  
3.987  
3.789  
3.777  
3.774  
3.762  
3.752  
3.746  
3.735  
3.203  
3.182  
3.176  
3.162  
3.157  
3.153  
3.135  
2.953  
2.856  
2.648  
2.639  
2.630  
2.619  
2.500  
2.005  
1.185  
1.167  
1.149

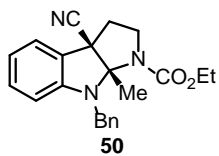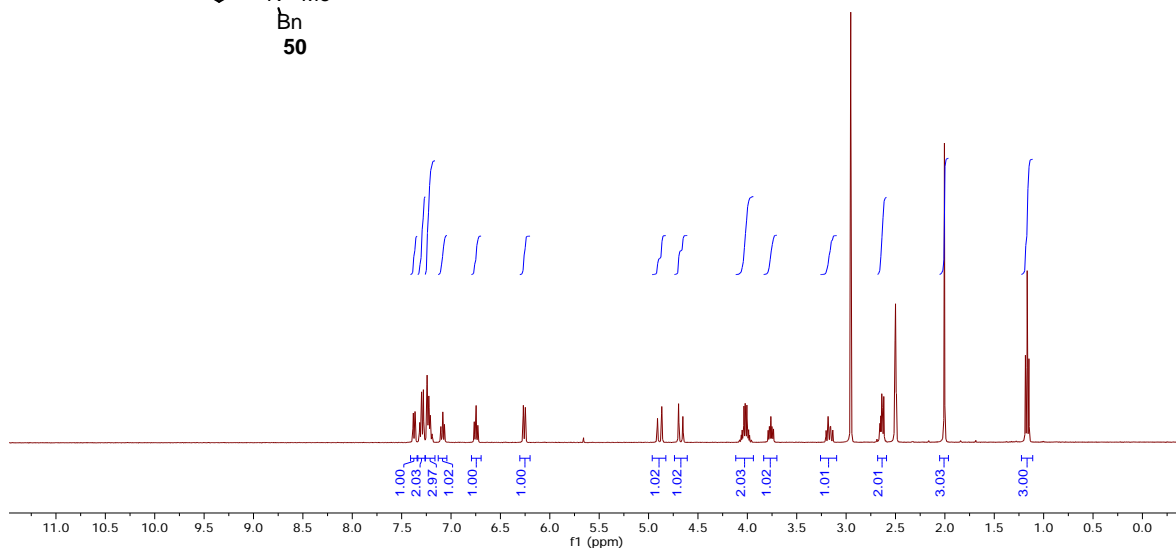

# <sup>13</sup>C NMR (101 MHz, DMSO-d<sub>6</sub>, 100 °C)

153.133  
147.833  
138.471  
129.719  
127.775  
126.018  
125.615  
123.380  
122.820  
118.565  
117.773  
107.187  
89.670  
60.212  
54.829  
46.447  
45.750  
39.521  
32.160  
19.251  
13.656

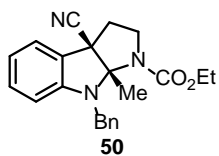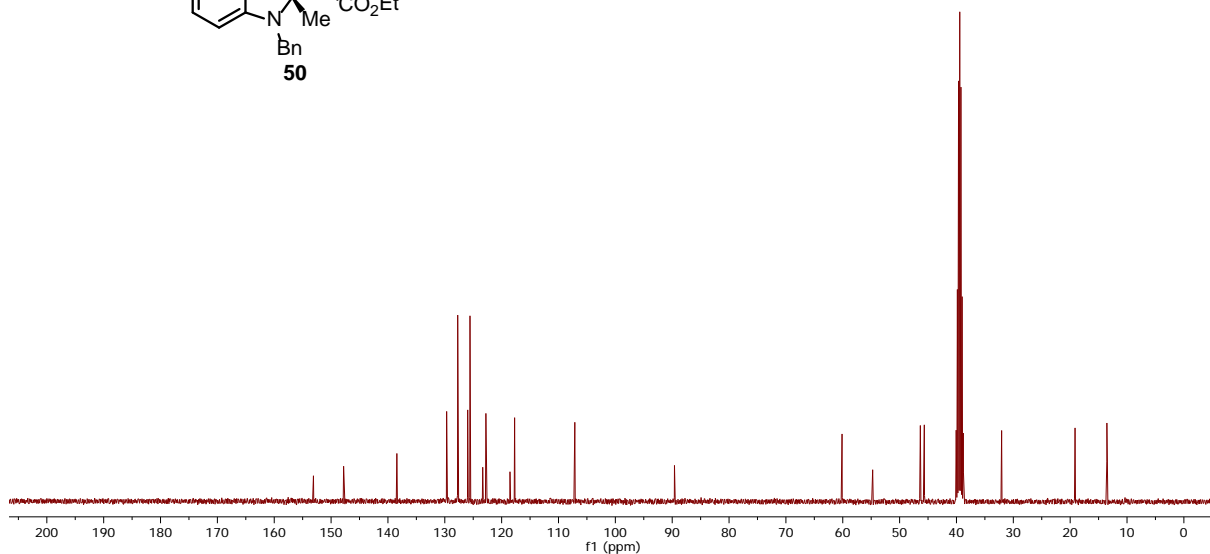

# <sup>1</sup>H NMR (400 MHz, DMSO-*d*<sub>6</sub>, 100 °C)

7.356  
7.354  
7.353  
7.351  
7.350  
7.337  
7.336  
7.334  
7.332  
7.331  
7.165  
7.162  
7.147  
7.146  
7.144  
7.142  
7.137  
7.134  
6.794  
6.791  
6.775  
6.772  
6.756  
6.754  
6.733  
6.732  
6.731  
6.729  
6.714  
6.712  
6.711  
6.710  
6.504  
4.122  
4.104  
4.087  
4.089  
3.639  
3.633  
3.620  
3.613  
3.606  
3.594  
3.587  
3.078  
3.062  
3.053  
3.052  
3.036  
3.035  
3.027  
3.010  
2.945  
2.942  
2.641  
2.639  
2.634  
2.633  
2.624  
2.622  
2.621  
2.617  
2.616  
2.602  
2.596  
2.576  
2.500  
1.861  
1.234  
1.216  
1.199

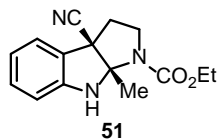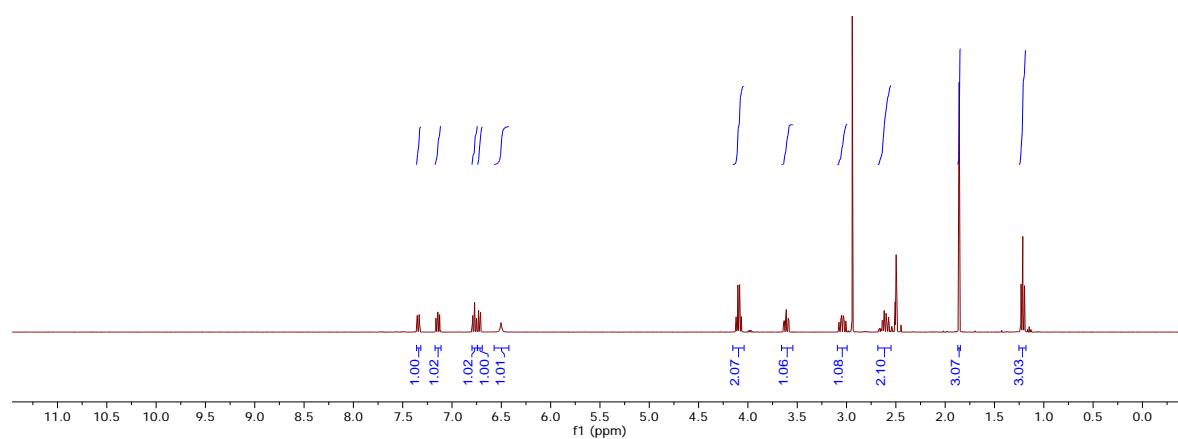

# <sup>13</sup>C NMR (101 MHz, DMSO-*d*<sub>6</sub>, 100 °C)

152.655  
148.464  
129.641  
123.750  
123.203  
118.634  
118.392  
109.471  
86.453  
60.061  
53.715  
44.894  
39.621  
31.670  
21.702  
13.767

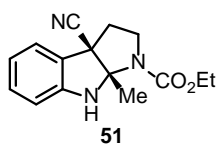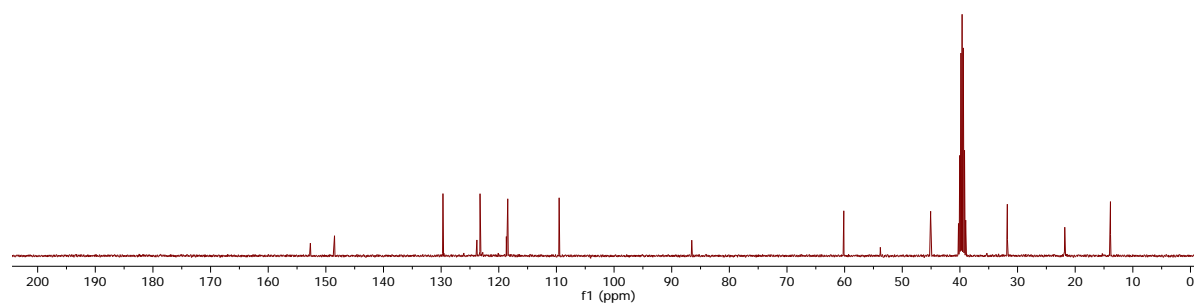



# <sup>1</sup>H NMR (400 MHz, DMSO-d<sub>6</sub>, 100 °C)

7.426  
7.414  
7.410  
7.406  
7.402  
7.399  
7.387  
7.384  
7.382  
7.378  
7.367  
7.364  
7.362  
7.346  
7.347  
7.344  
7.342  
7.341  
7.330  
7.328  
7.327  
7.325  
7.324  
7.173  
7.169  
7.154  
7.153  
7.151  
7.150  
7.134  
7.131  
6.792  
6.779  
6.770  
6.754  
6.754  
6.752  
6.706  
6.705  
6.702  
6.687  
6.685  
6.682  
5.823  
5.822  
5.818  
5.817  
5.185  
5.156  
5.154  
5.124  
3.830  
3.824  
3.811  
3.804  
3.797  
3.783  
3.777  
3.082  
3.067  
2.956  
2.698  
2.687  
2.667  
2.662  
2.642  
2.510  
2.505  
2.500  
2.495  
2.491

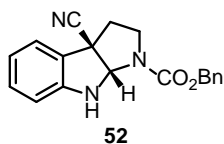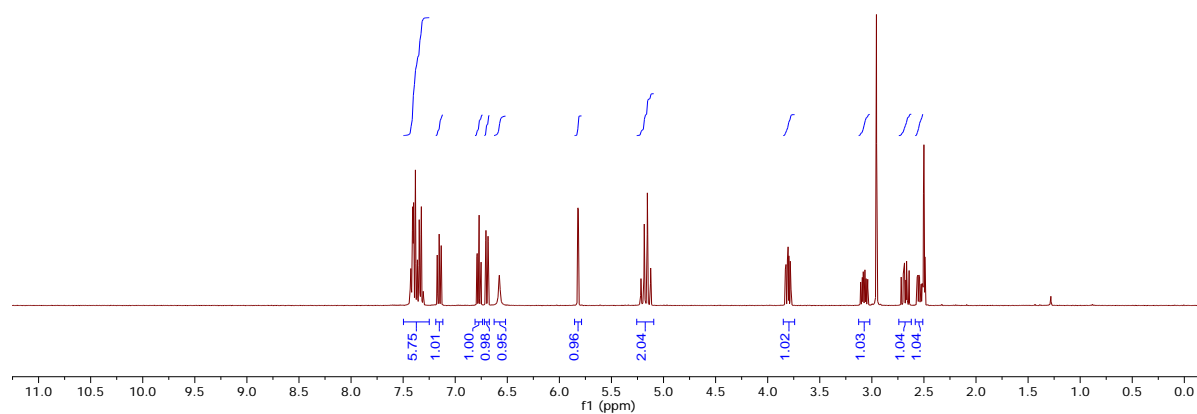

# <sup>13</sup>C NMR (101 MHz, DMSO-d<sub>6</sub>, 100 °C)

152.905  
149.024  
136.146  
129.653  
127.766  
127.227  
126.967  
123.689  
123.080  
119.789  
118.352  
109.379  
79.579  
65.987  
48.373  
44.249  
38.520  
35.423

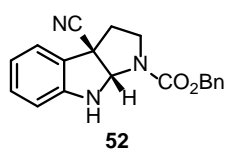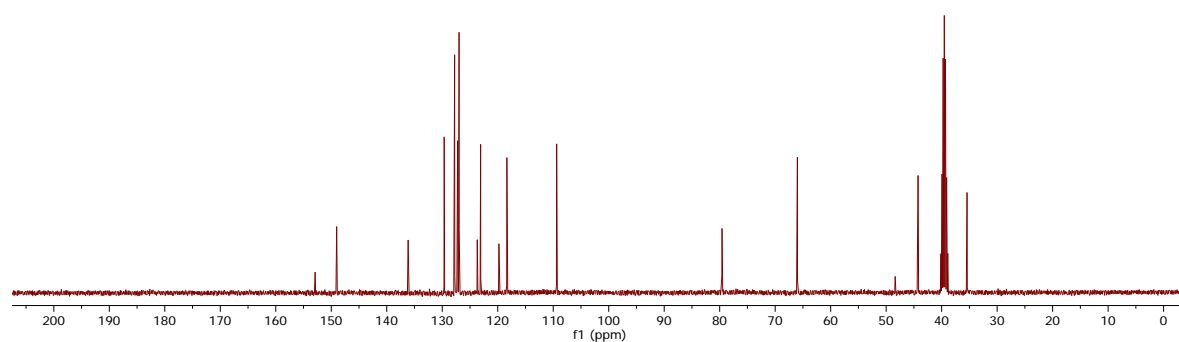

# <sup>1</sup>H NMR (400 MHz, DMSO-*d*<sub>6</sub>, 100 °C)

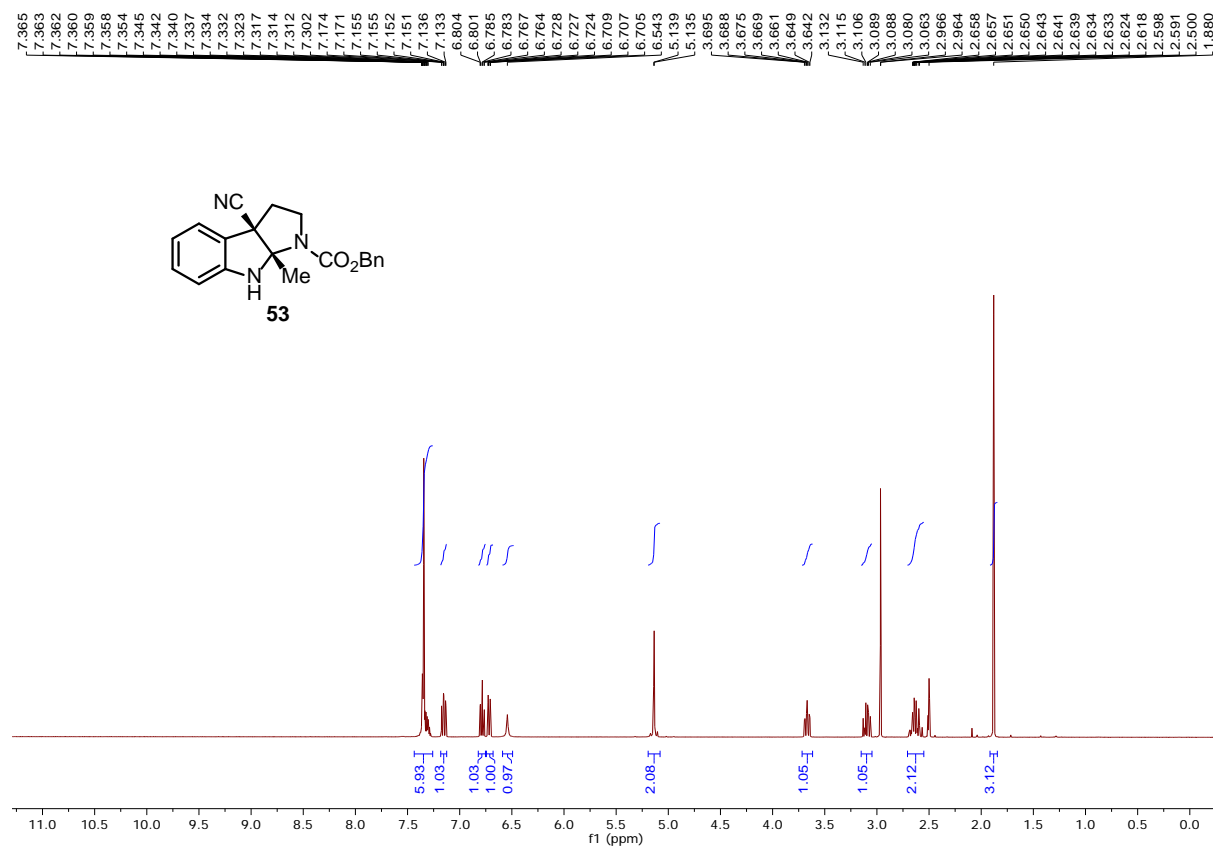

# <sup>13</sup>C NMR (101 MHz, DMSO-*d*<sub>6</sub>, 100 °C)

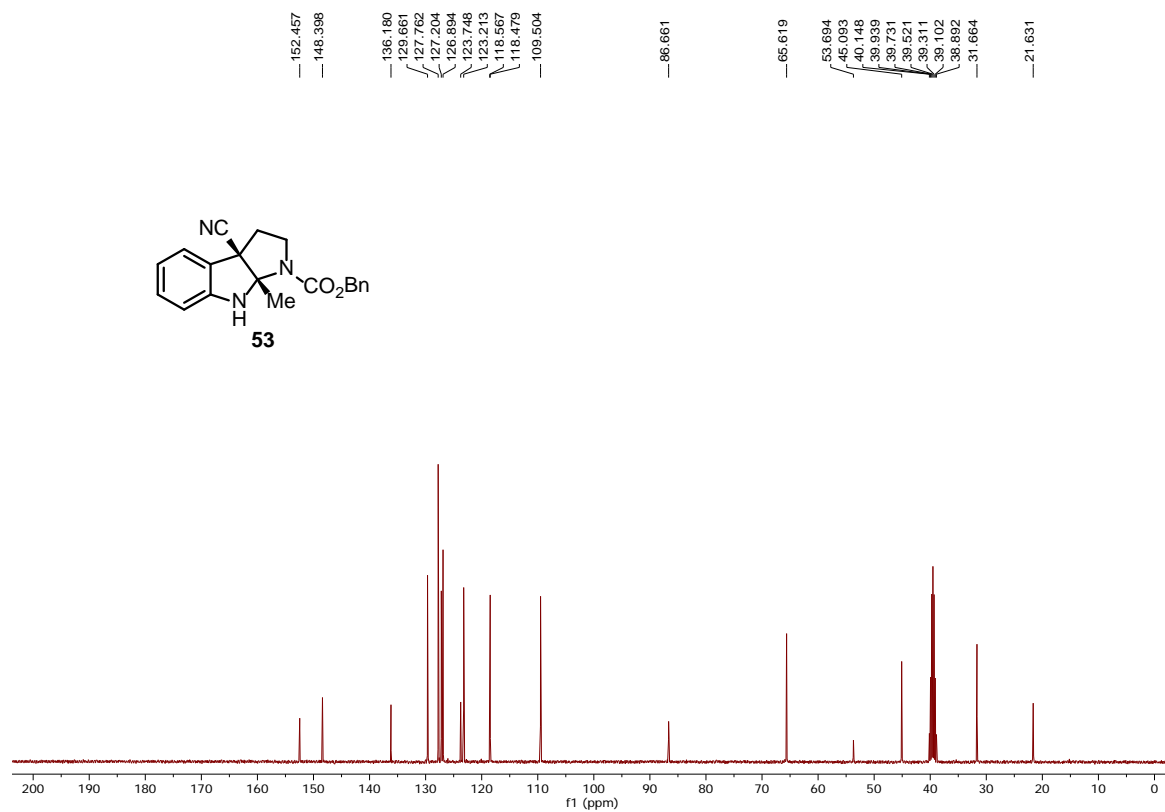

# <sup>1</sup>H NMR (400 MHz, DMSO-d<sub>6</sub>, 100 °C)

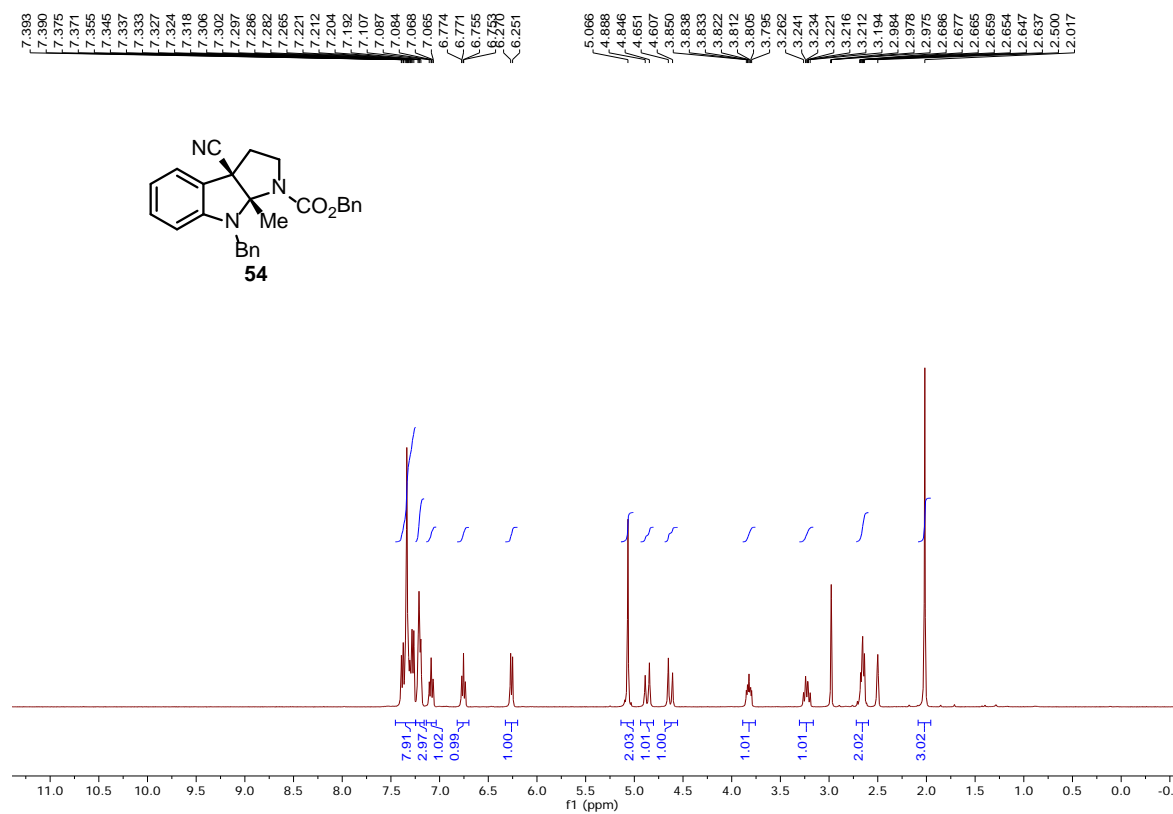

# <sup>13</sup>C NMR (101 MHz, DMSO-d<sub>6</sub>, 100 °C)

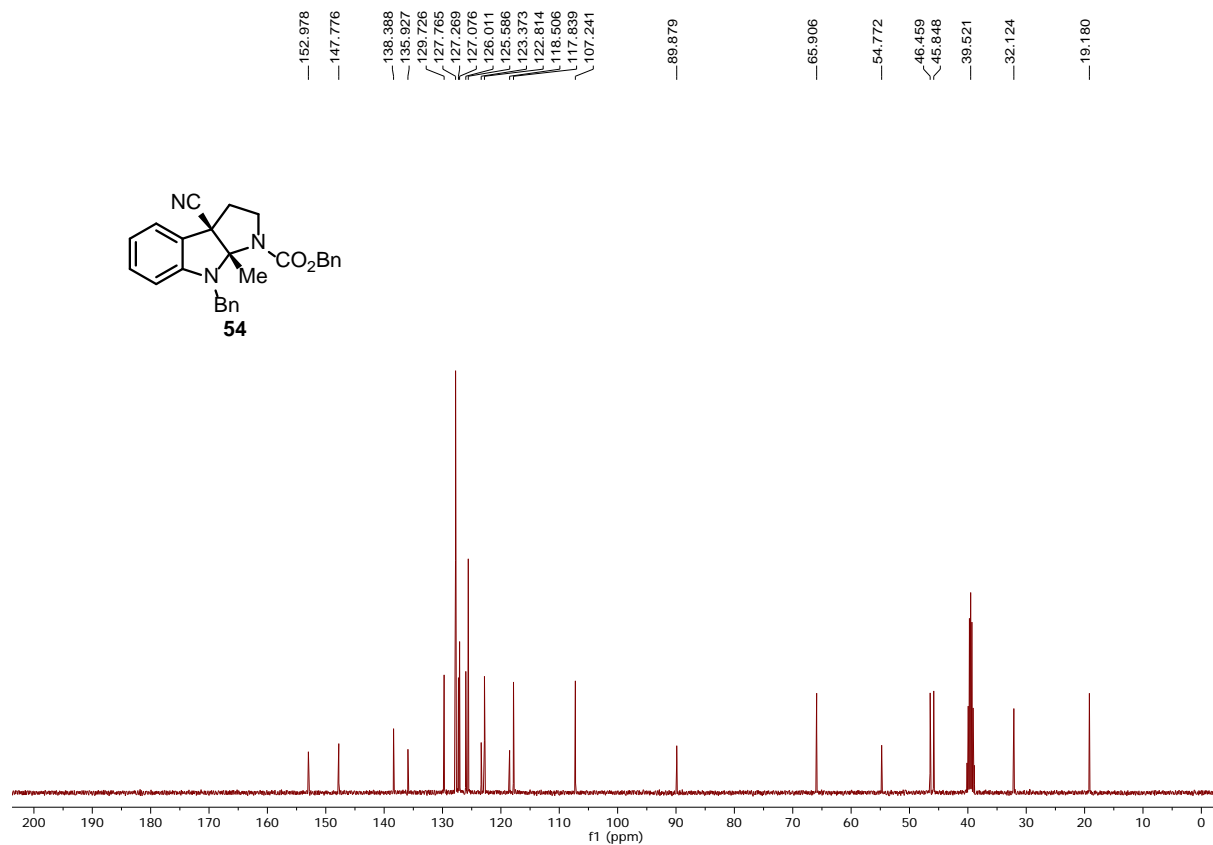

# <sup>1</sup>H NMR (400 MHz, Chloroform-*d*)

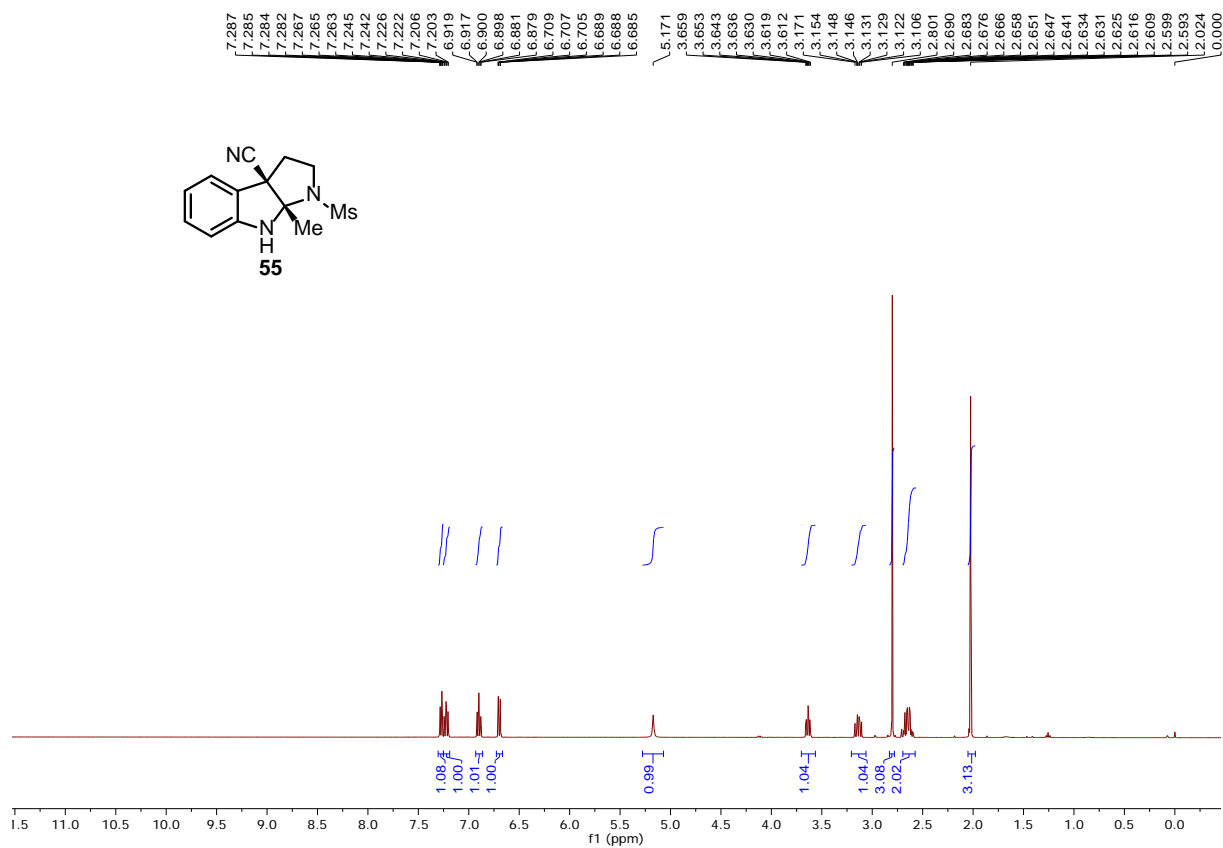

# <sup>13</sup>C NMR (101 MHz, Chloroform-*d*)

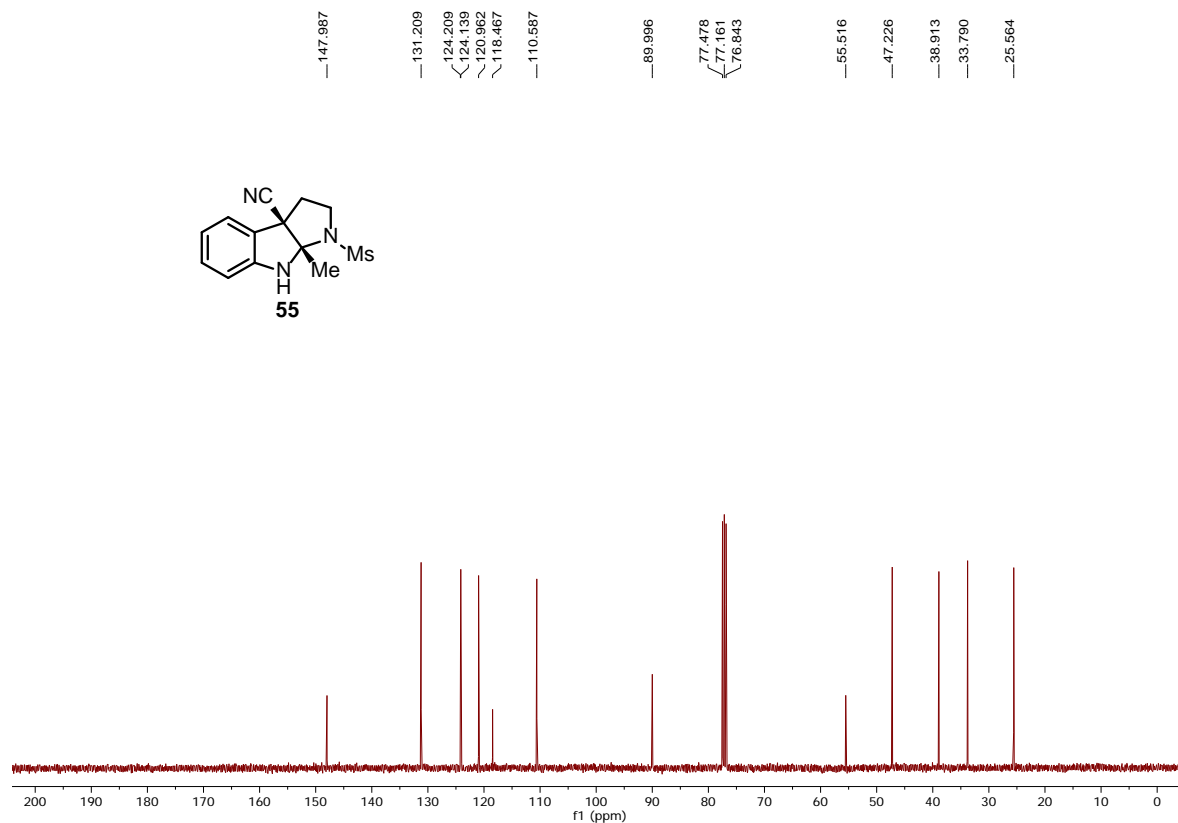

# <sup>1</sup>H NMR (300 MHz, Chloroform-*d*)

7.296  
7.271  
7.259  
7.194  
7.190  
7.169  
7.165  
7.143  
7.139  
6.863  
6.860  
6.838  
6.835  
6.813  
6.809  
6.645  
6.619  
6.012  
6.004

4.748  
4.135  
4.130  
4.113  
4.110  
4.105  
4.089  
4.081  
4.075  
3.671  
3.654  
3.640  
3.634  
3.624  
3.617  
3.604  
3.588  
2.735  
2.710  
2.697  
2.683  
2.672  
2.657  
2.653  
2.633  
2.476  
2.471  
2.459  
2.454  
2.435  
2.430  
2.419  
2.414  
1.645  
0.001

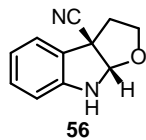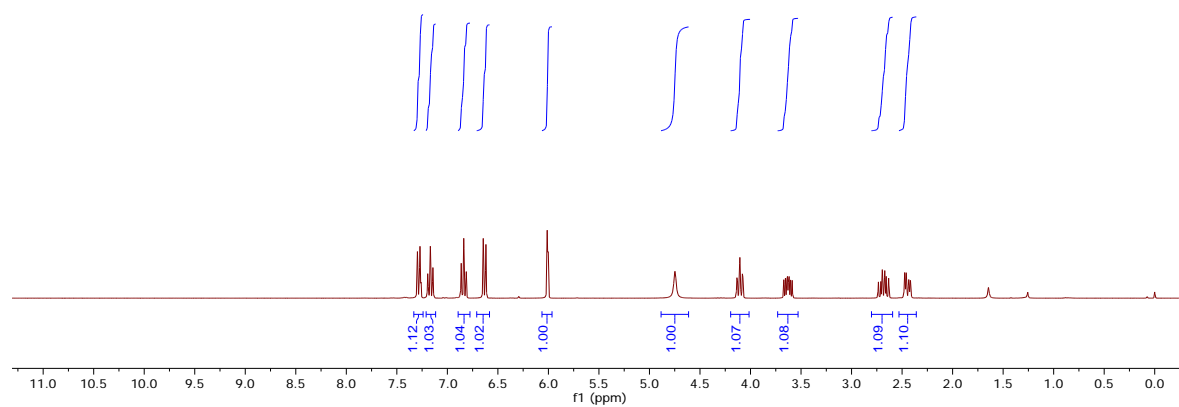

# <sup>13</sup>C NMR (75 MHz, Chloroform-*d*)

148.956  
130.539  
124.672  
124.501  
120.793  
120.215  
109.378  
97.558  
77.584  
77.161  
76.736  
66.543  
49.762  
40.848

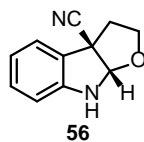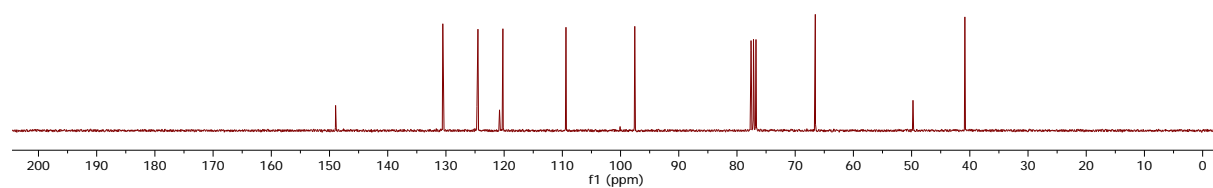

### <sup>1</sup>H NMR (400 MHz, Chloroform-*d*)

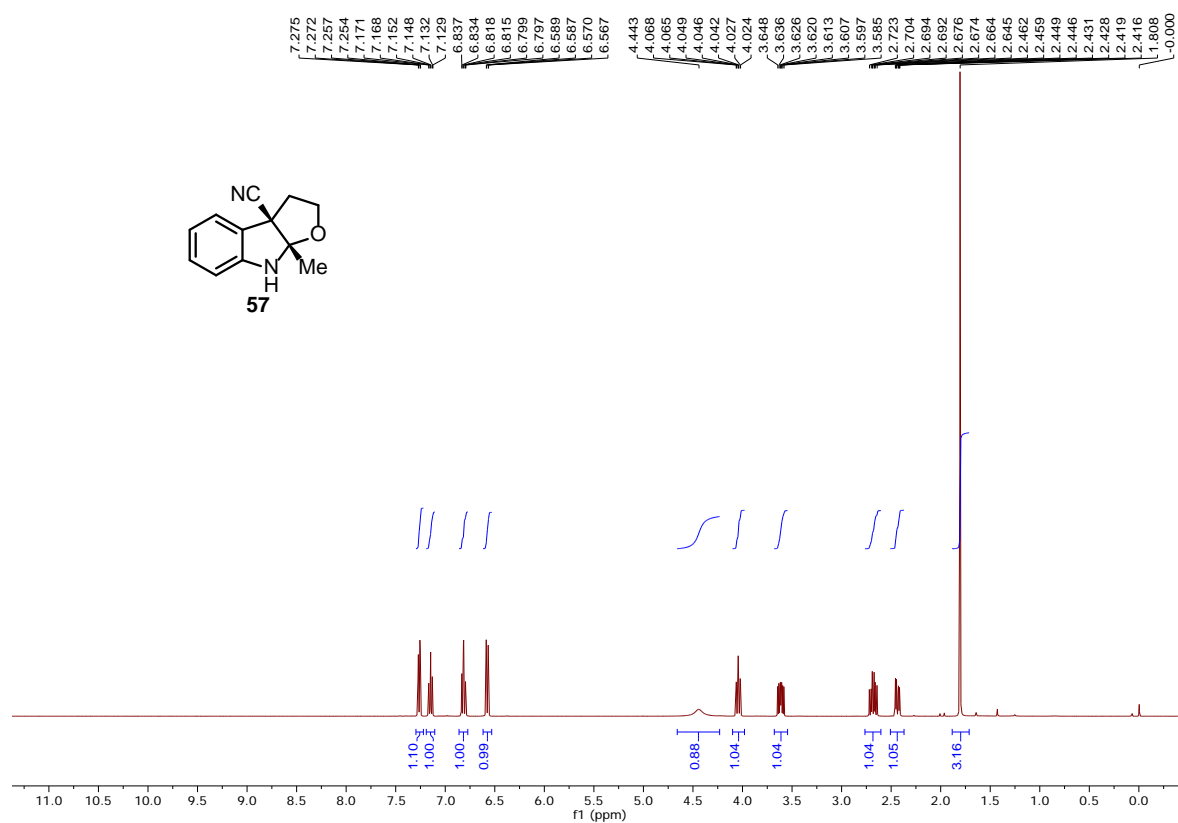

### <sup>13</sup>C NMR (101 MHz, Chloroform-*d*)

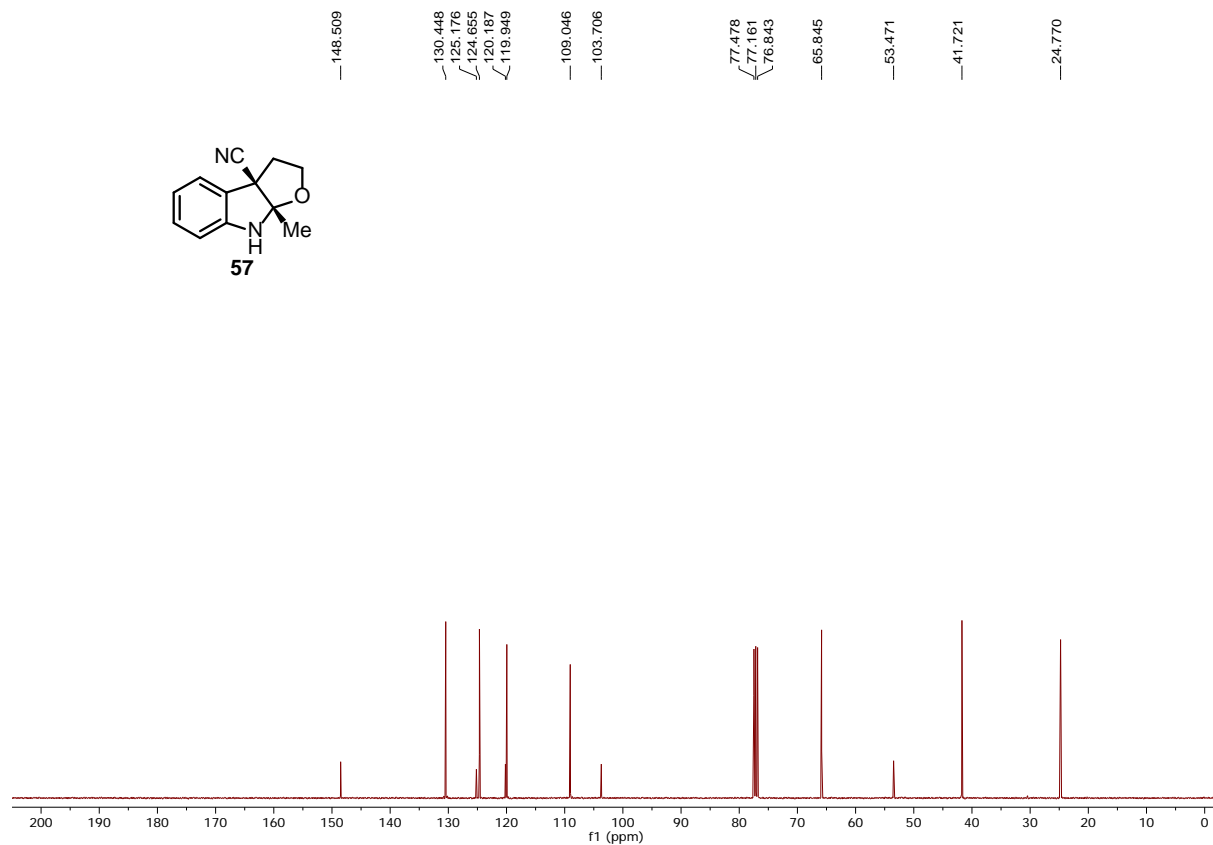

# <sup>1</sup>H NMR (400 MHz, Chloroform-*d*)

7.622  
7.617  
7.607  
7.602  
7.598  
7.590  
7.435  
7.431  
7.427  
7.422  
7.413  
7.402  
7.396  
7.384  
7.380  
7.368  
7.363  
7.257  
7.254  
7.238  
7.235  
7.233  
7.221  
7.218  
7.202  
7.189  
7.182  
7.179  
6.867  
6.864  
6.848  
6.845  
6.829  
6.827  
6.683  
6.663  
4.790  
4.335  
4.318  
4.315  
4.312  
4.285  
3.826  
3.814  
3.803  
3.796  
3.792  
3.784  
3.774  
3.762  
2.797  
2.778  
2.766  
2.748  
2.736  
2.718  
2.594  
2.522  
2.503  
2.482

— 0.000

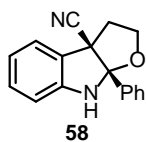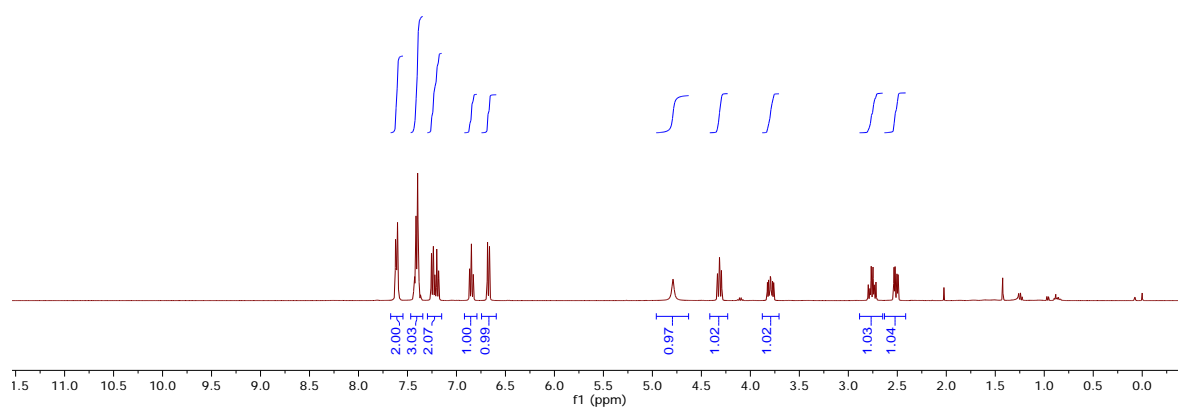

# <sup>13</sup>C NMR (101 MHz, Chloroform-*d*)

149.193  
139.209  
130.555  
129.510  
128.594  
126.623  
124.774  
124.169  
120.094  
119.573  
108.716  
106.389  
77.478  
77.161  
76.843  
67.027  
56.770  
41.076

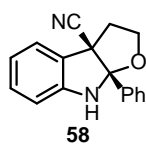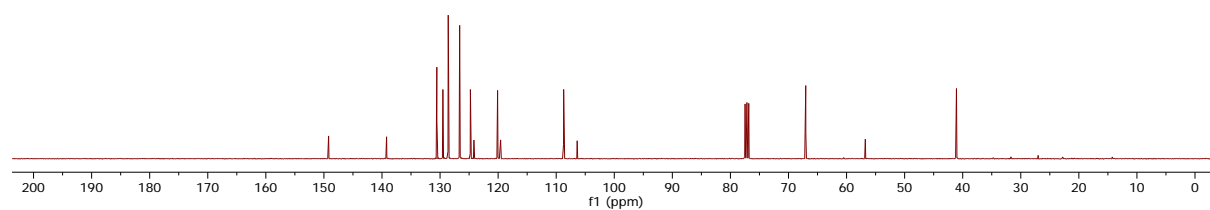

# <sup>1</sup>H NMR (400 MHz, Chloroform-*d*)

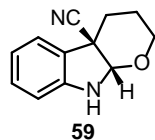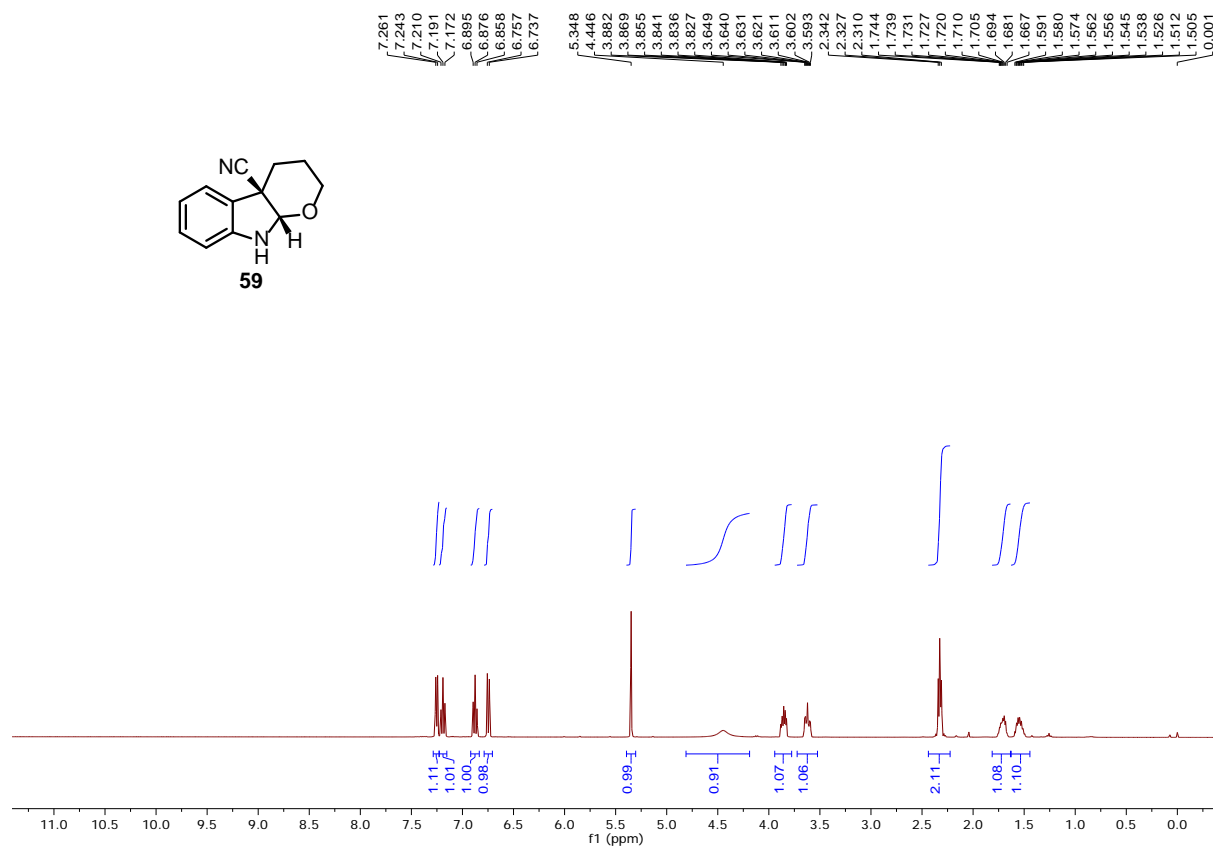

# <sup>13</sup>C NMR (101 MHz, Chloroform-*d*)

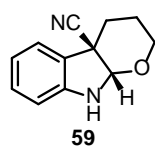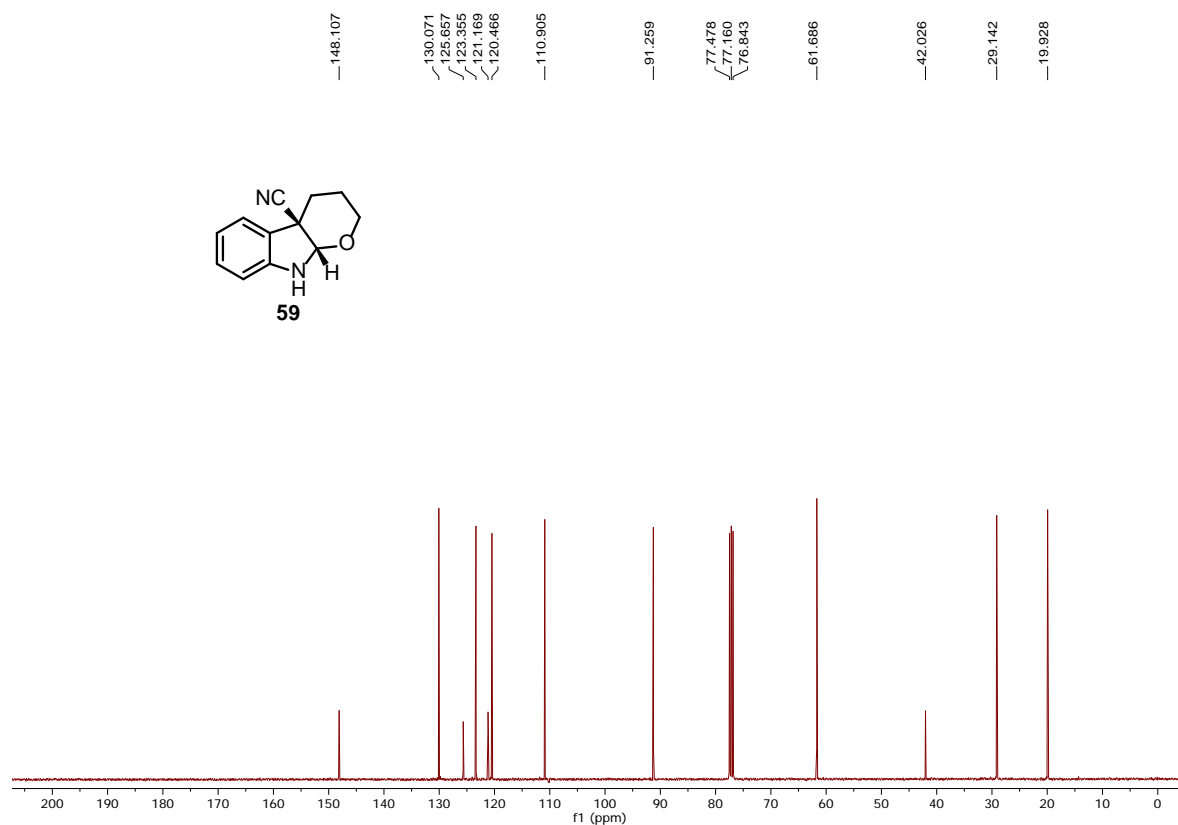



# <sup>1</sup>H NMR (400 MHz, Chloroform-*d*)

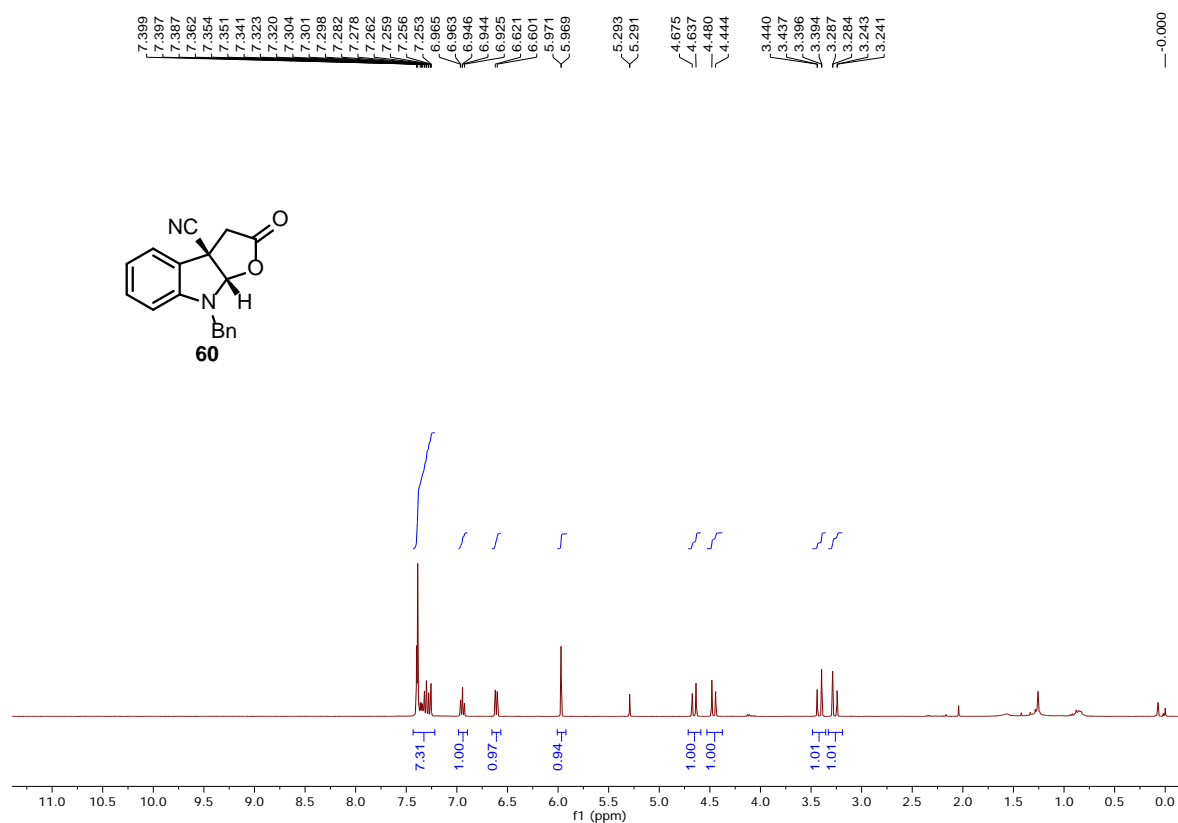

# <sup>13</sup>C NMR (101 MHz, Chloroform-*d*)

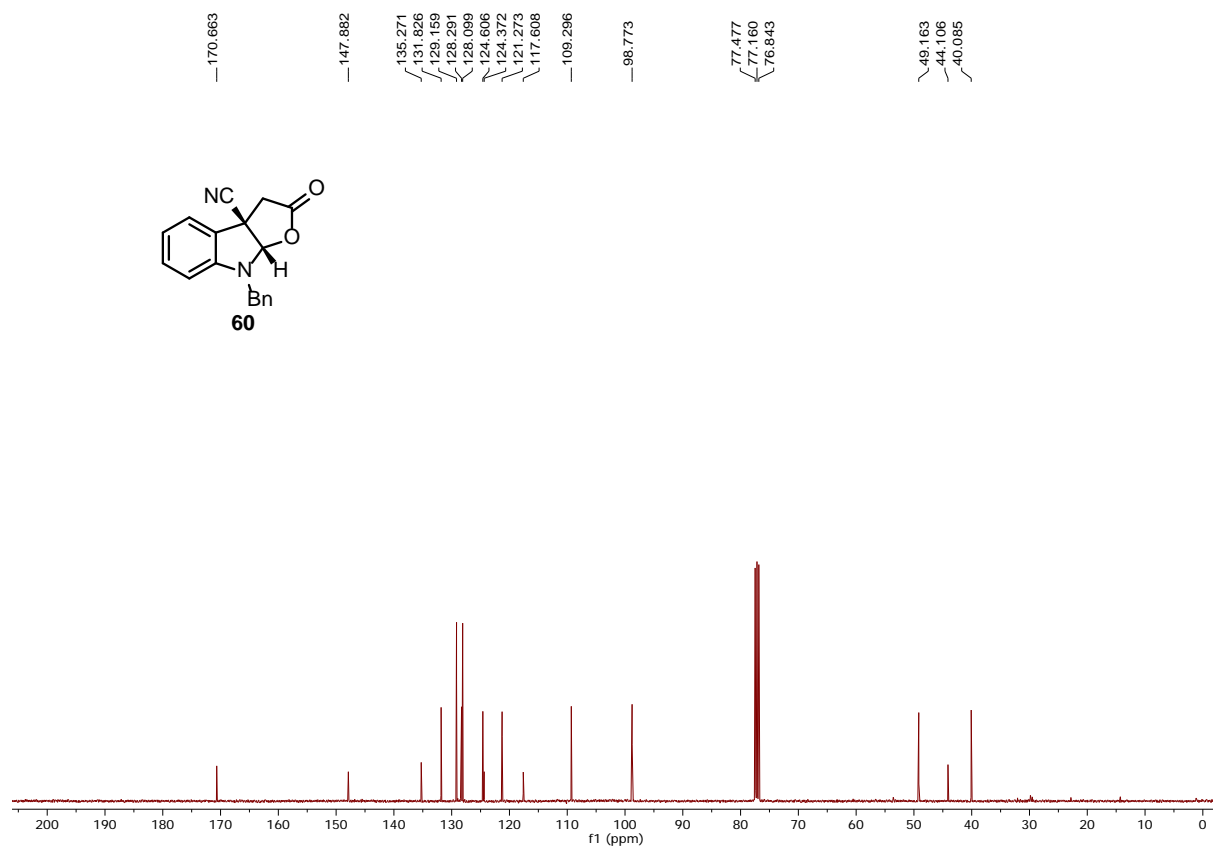

# <sup>1</sup>H NMR (400 MHz, Chloroform-*d*)

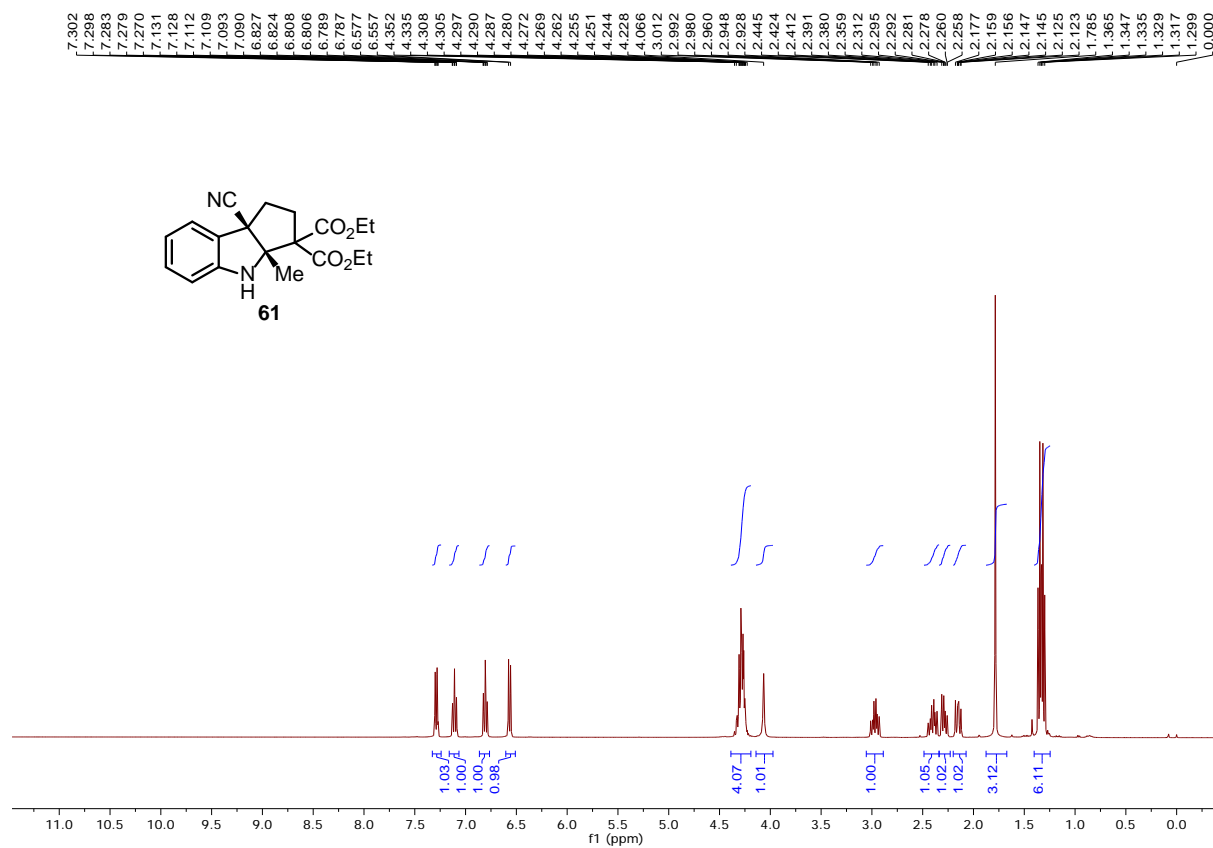

# <sup>13</sup>C NMR (101 MHz, Chloroform-*d*)

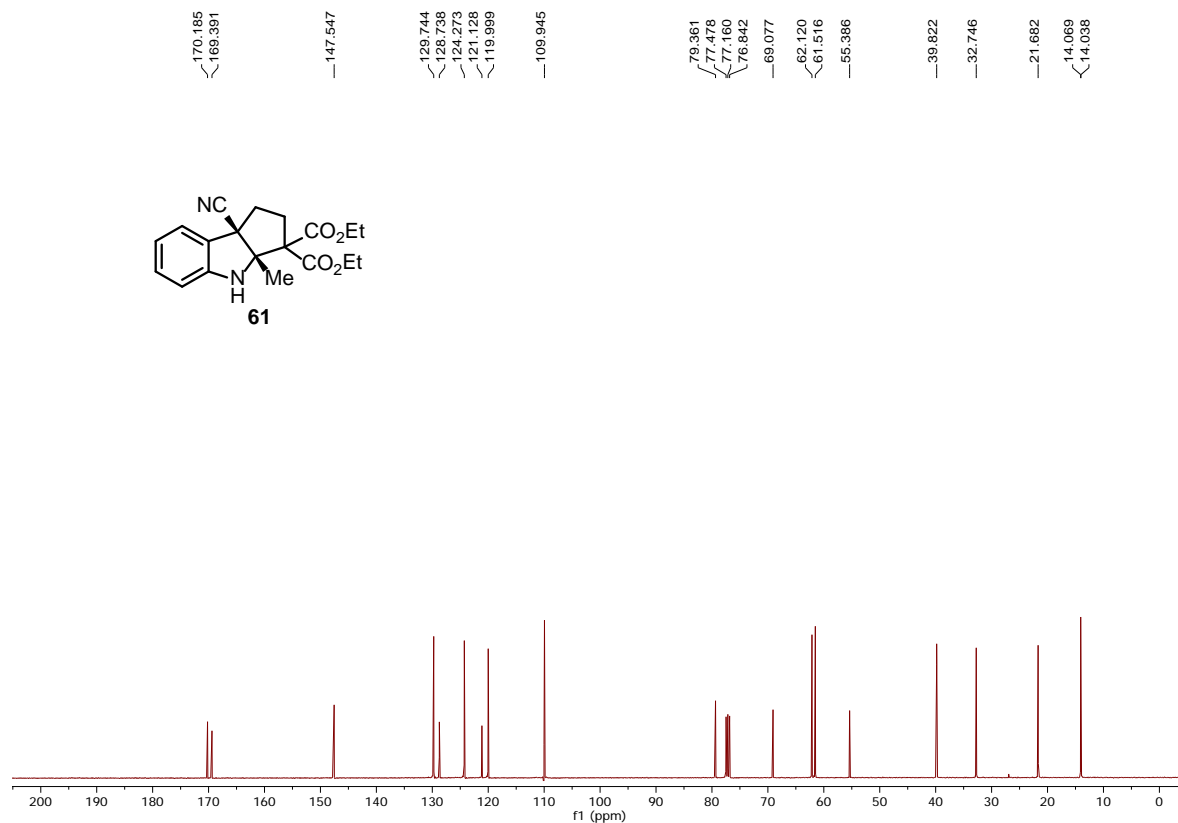

# <sup>1</sup>H NMR (400 MHz, Chloroform-*d*)

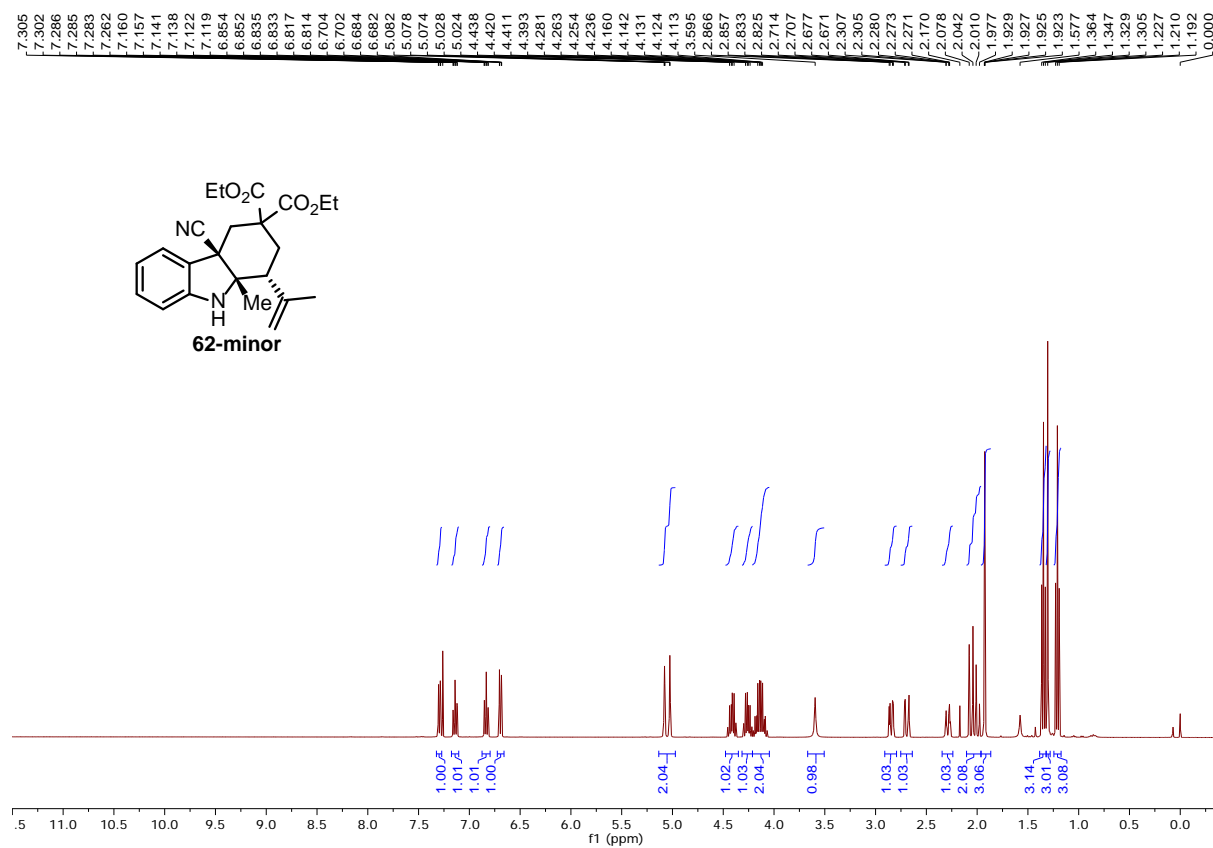

# <sup>13</sup>C NMR (101 MHz, Chloroform-*d*)

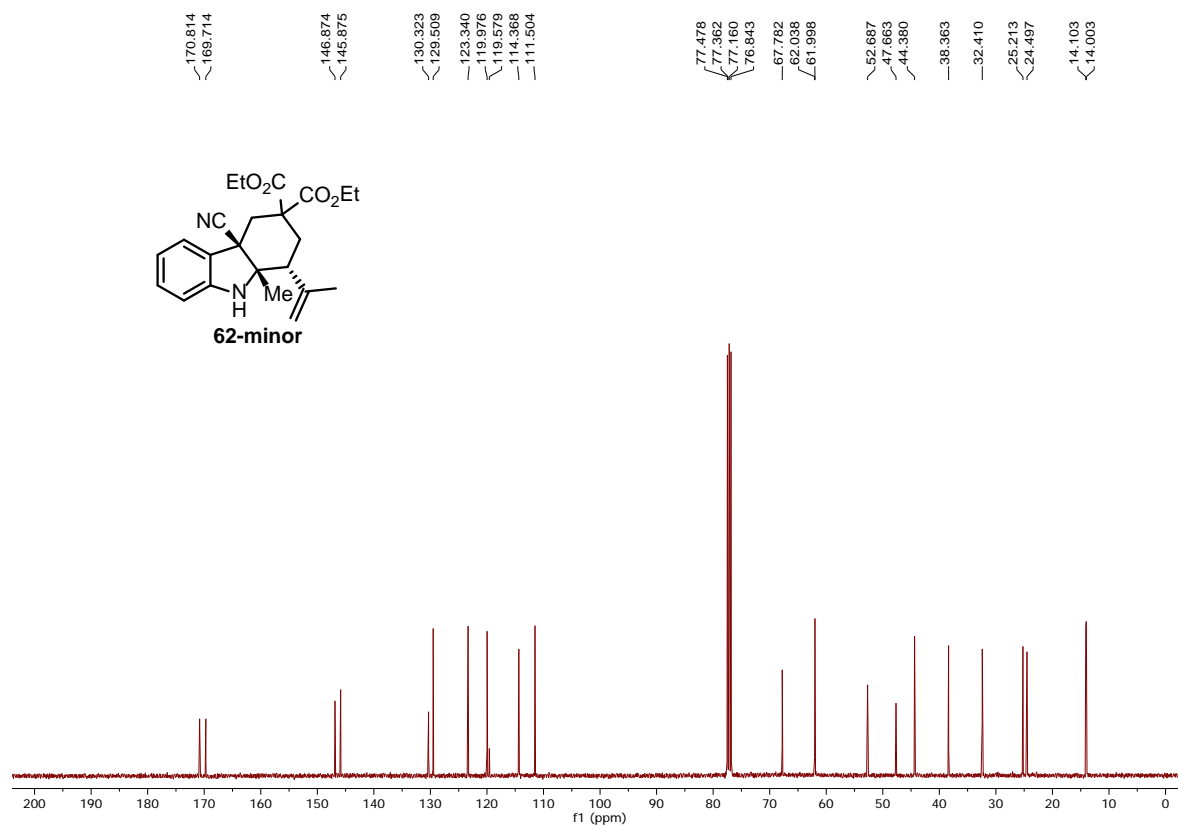

# <sup>1</sup>H NMR (400 MHz, Chloroform-d)

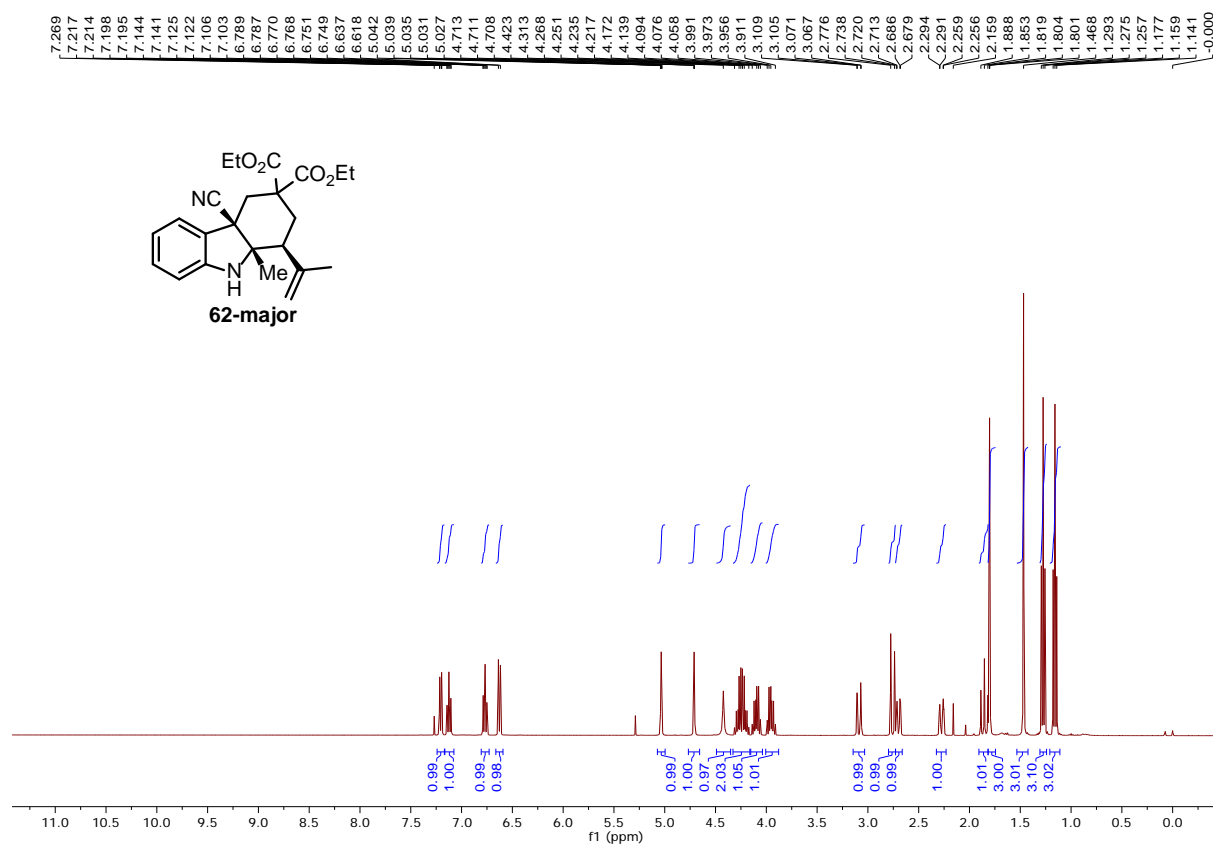

# <sup>13</sup>C NMR (101 MHz, Chloroform-d)

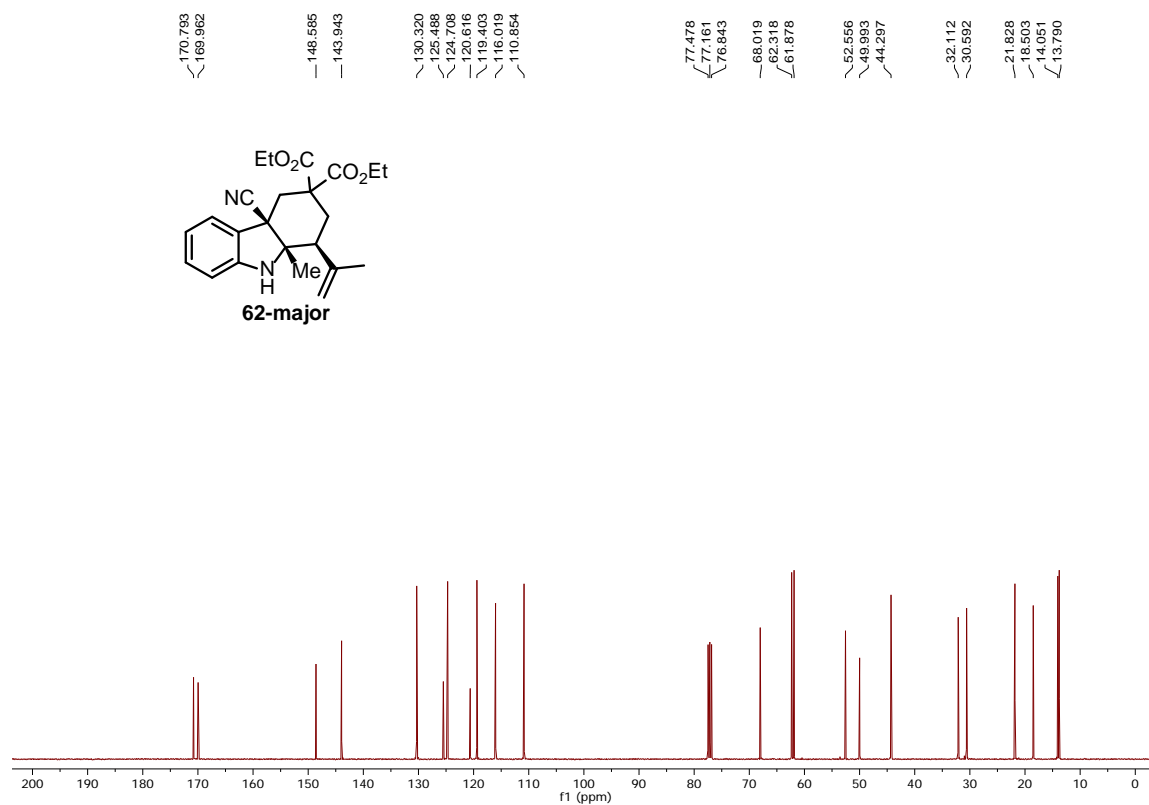

# <sup>1</sup>H NMR (400 MHz, Chloroform-*d*)

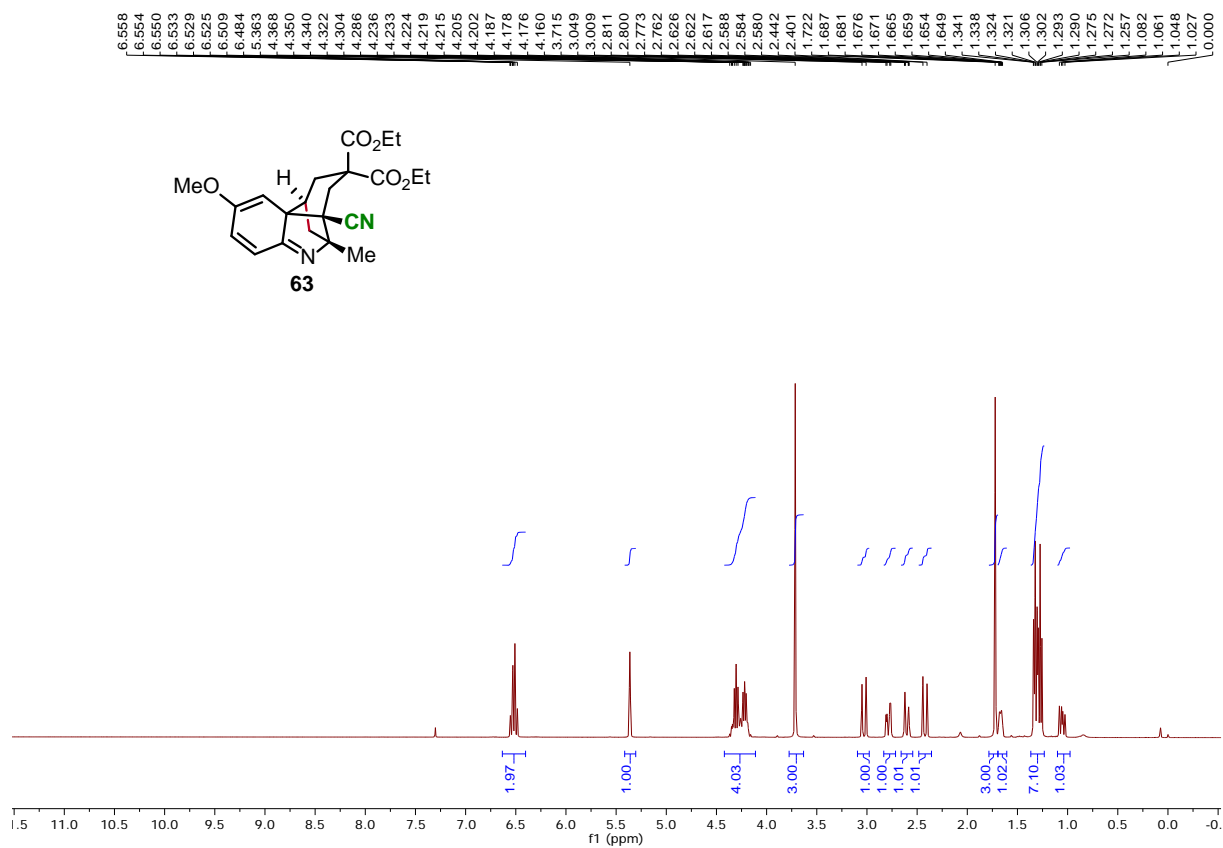

# <sup>13</sup>C NMR (101 MHz, Chloroform-*d*)

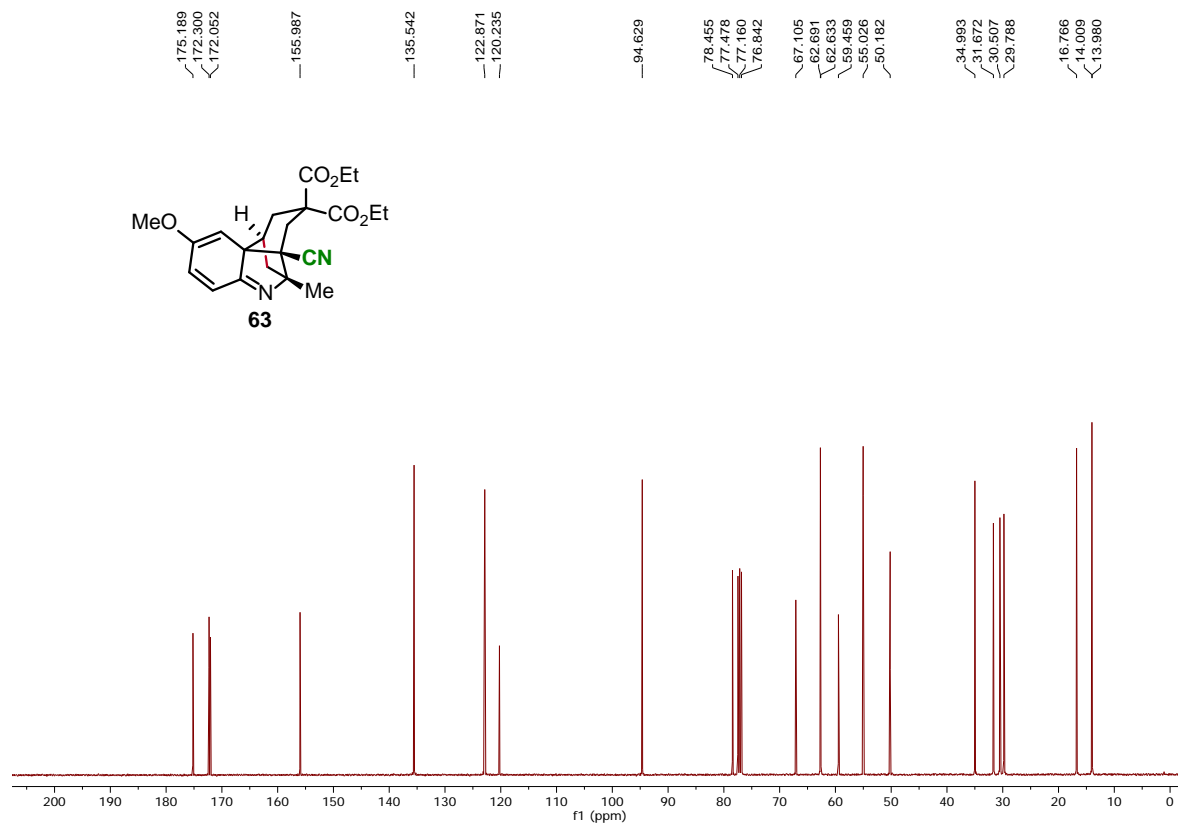

# <sup>1</sup>H NMR (400 MHz, Chloroform-d)

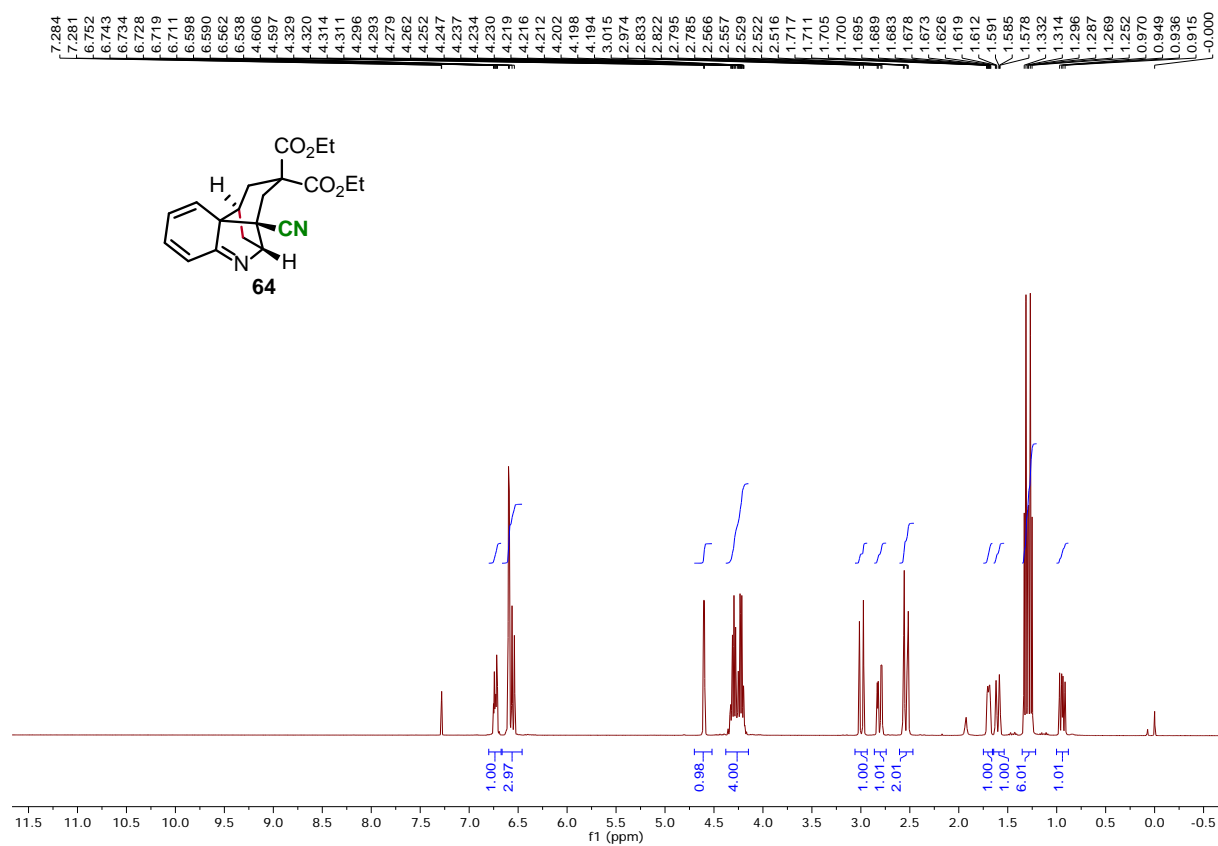

# <sup>13</sup>C NMR (101 MHz, Chloroform-d)

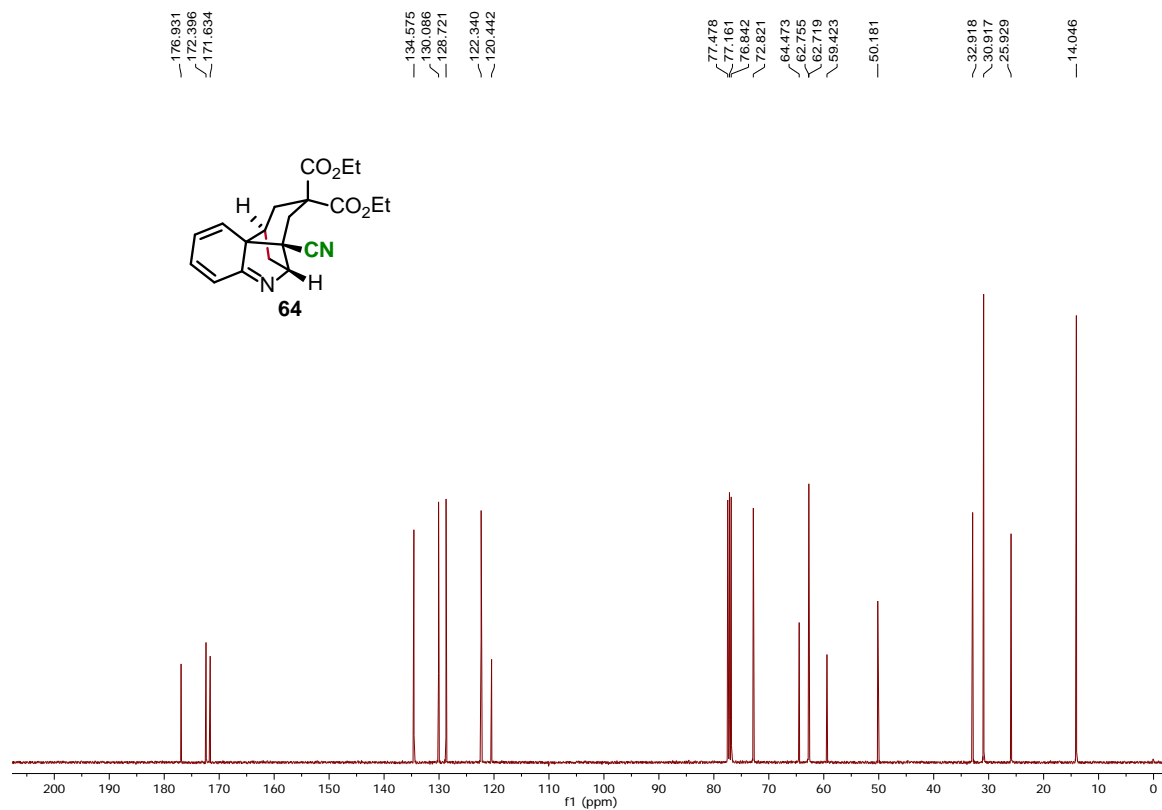

# <sup>1</sup>H NMR (400 MHz, Chloroform-*d*)

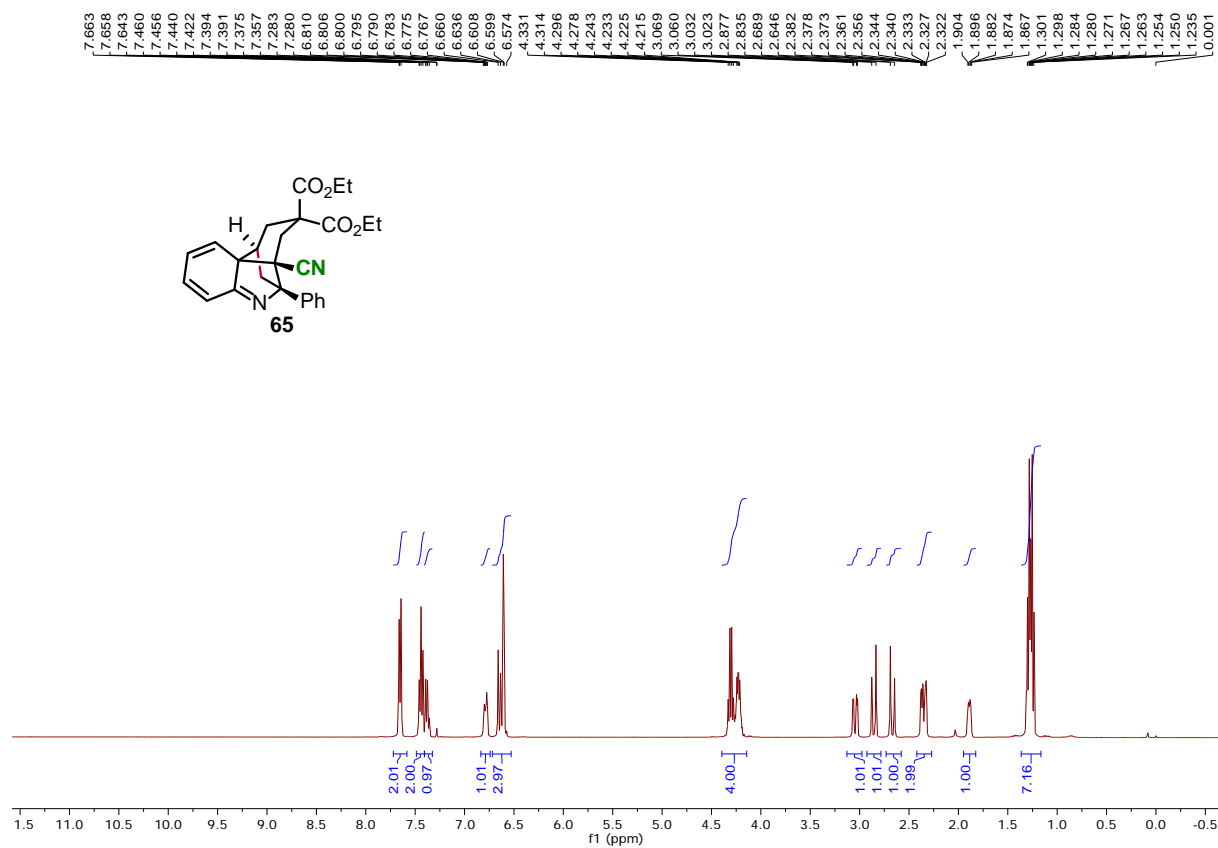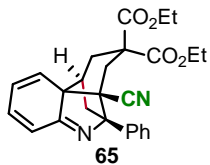

# <sup>13</sup>C NMR (101 MHz, Chloroform-*d*)

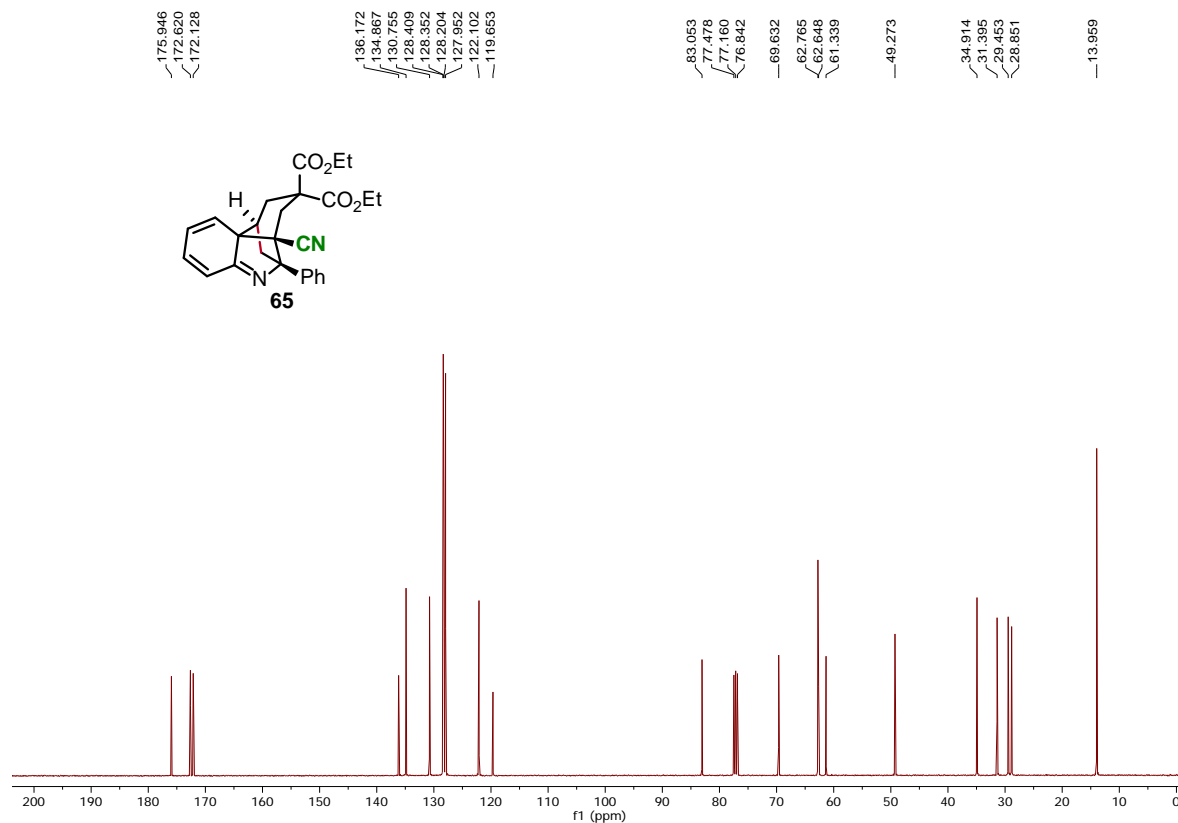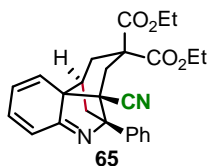

# <sup>1</sup>H NMR (400 MHz, Chloroform-*d*)

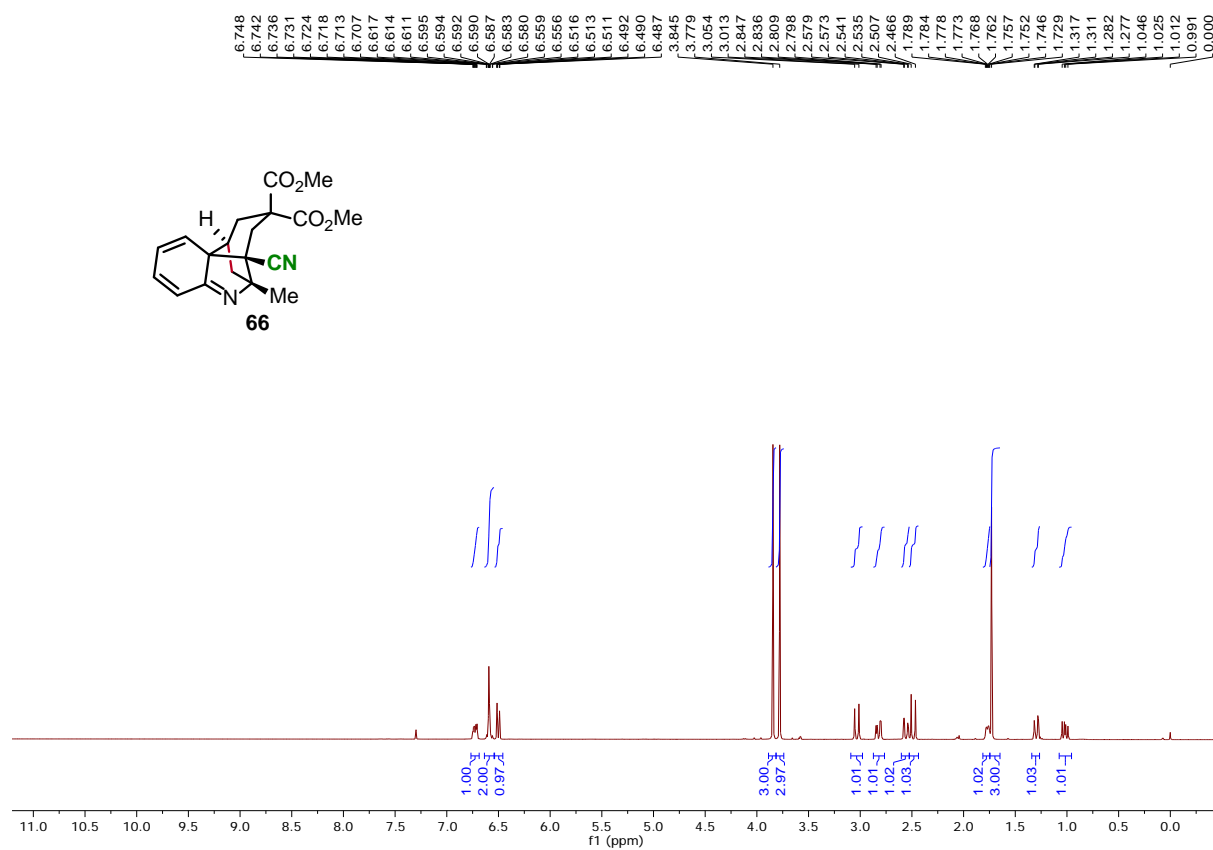

# <sup>13</sup>C NMR (101 MHz, Chloroform-*d*)

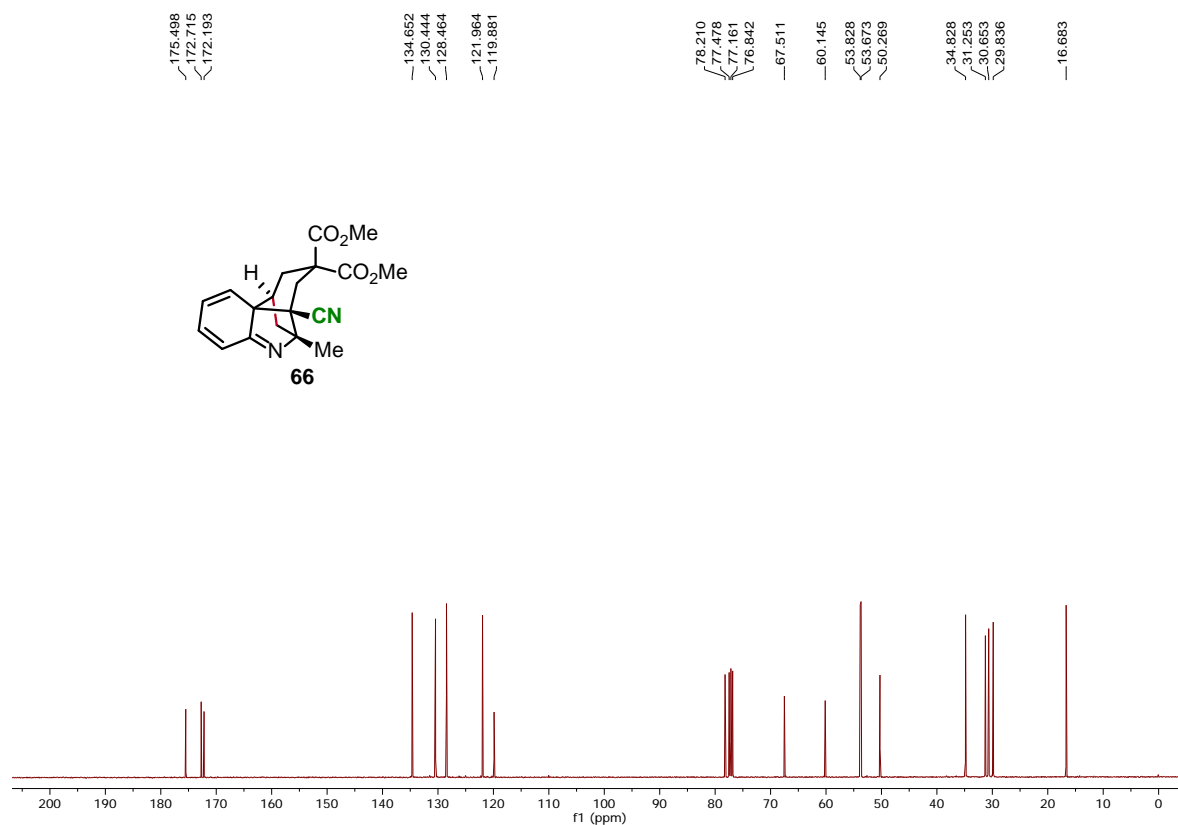



# <sup>1</sup>H NMR (400 MHz, Chloroform-*d*)

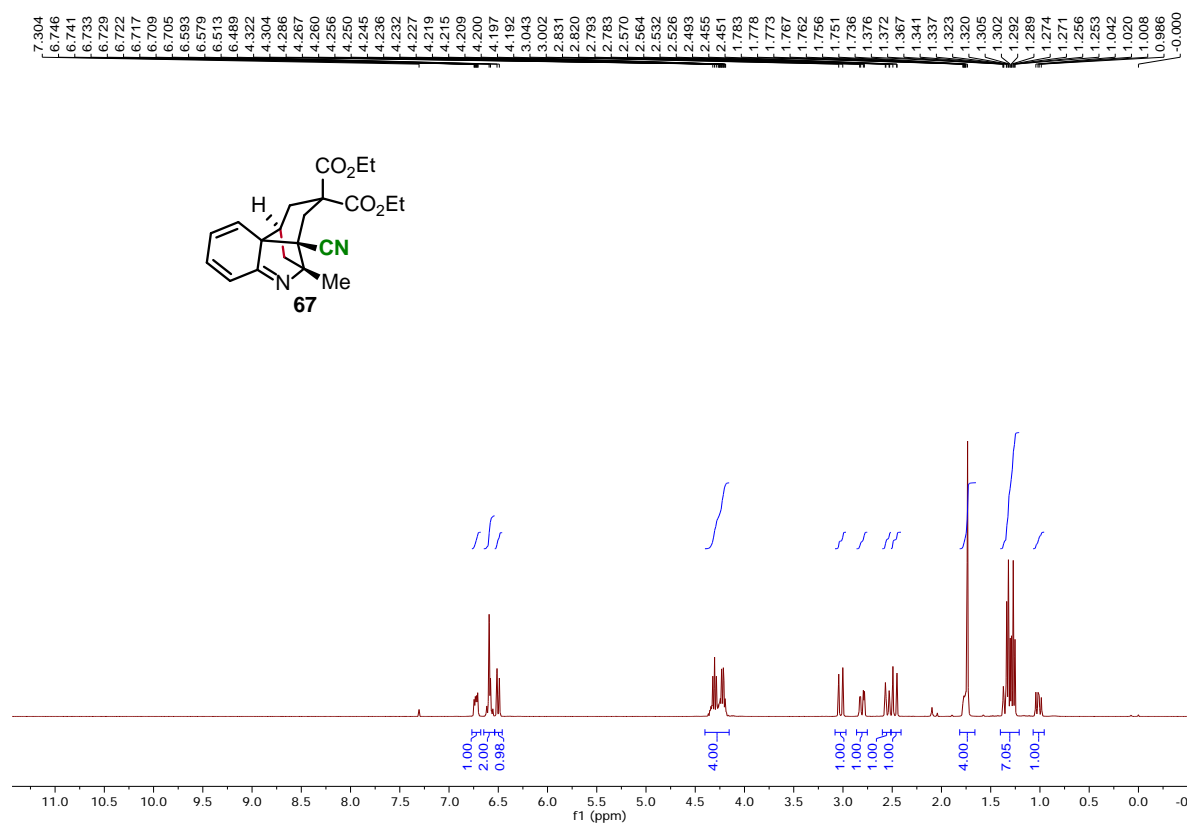

# <sup>13</sup>C NMR (101 MHz, Chloroform-*d*)

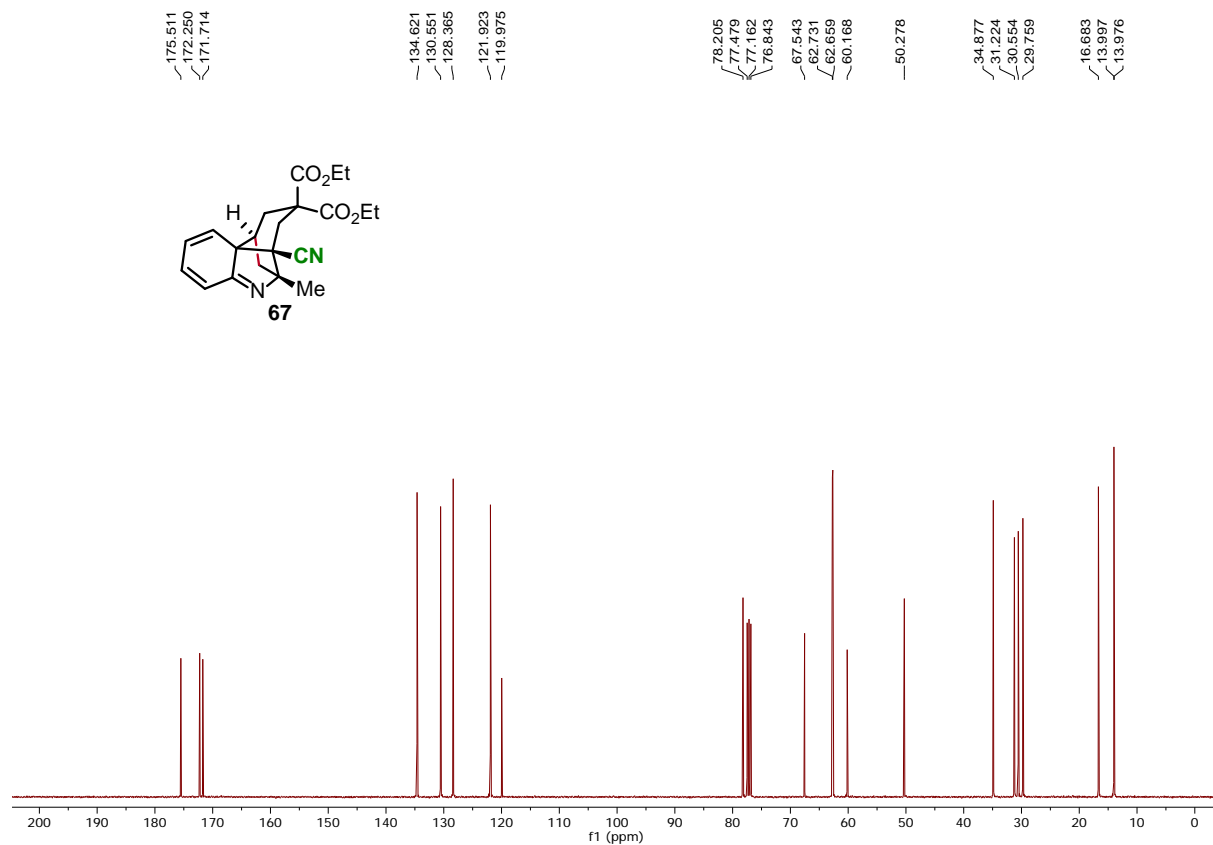

# <sup>1</sup>H NMR (400 MHz, Chloroform-*d*)

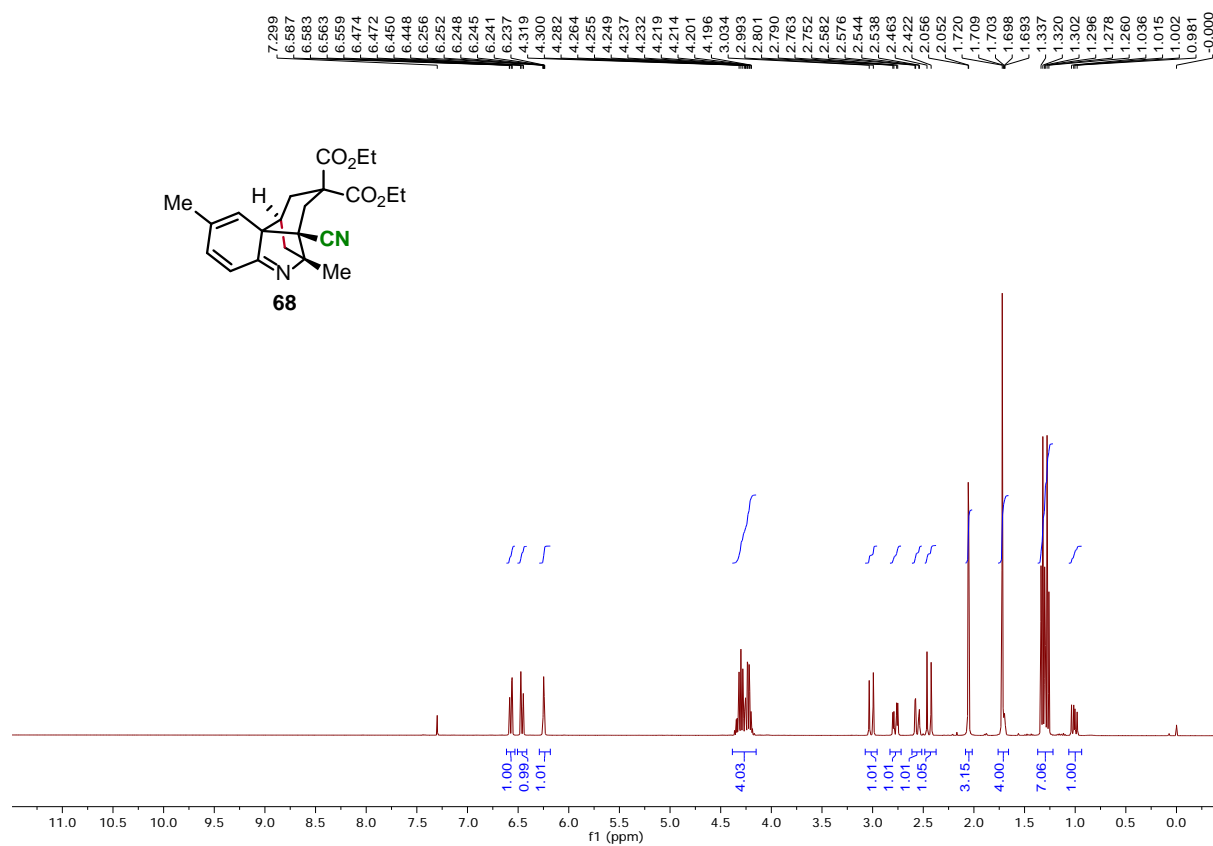

# <sup>13</sup>C NMR (101 MHz, Chloroform-*d*)

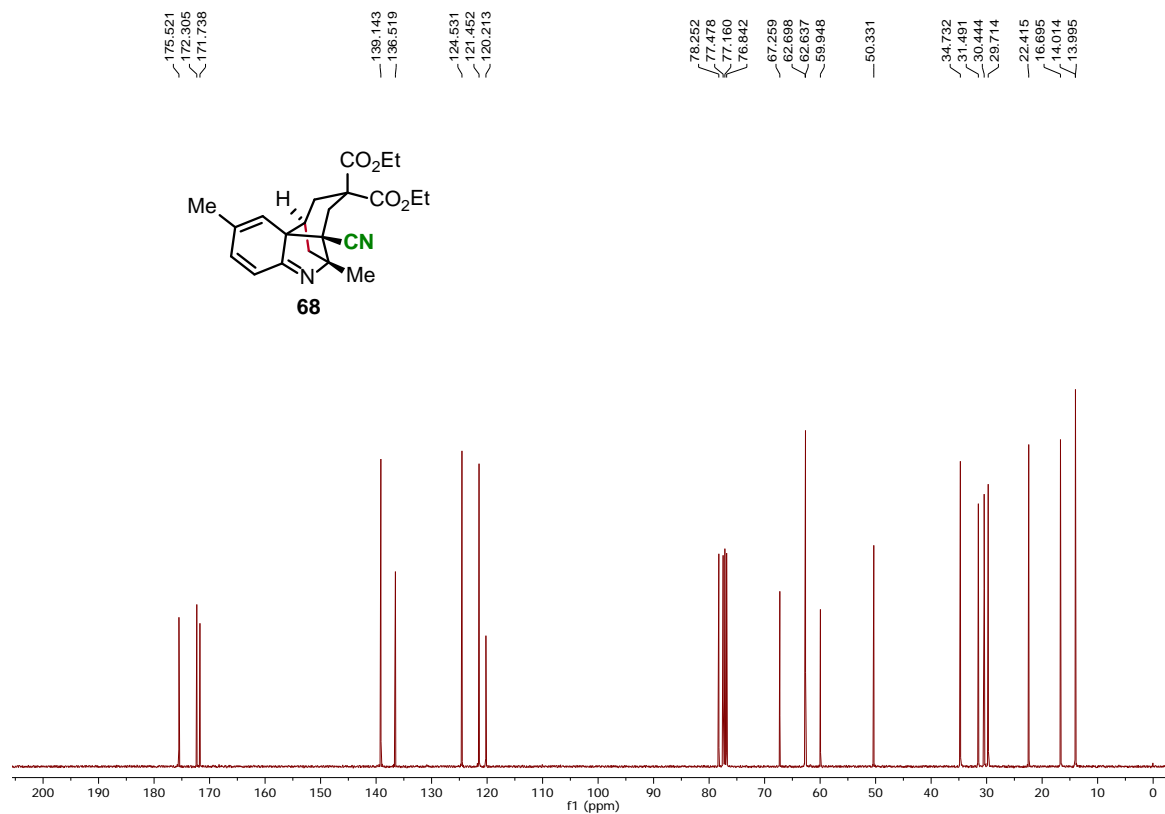

# <sup>1</sup>H NMR (400 MHz, Chloroform-*d*)

8.002  
7.983  
7.463  
7.460  
7.444  
7.441  
7.425  
7.422  
7.319  
7.316  
7.300  
7.297  
7.281  
7.278  
7.266  
7.076  
7.072  
7.065  
7.055  
7.046  
7.041  
7.031  
7.028  
7.024  
6.970  
6.951  
6.938  
6.933  
6.679  
6.661  
6.657  
6.563  
6.539  
6.528  
6.204  
6.078  
4.065  
4.054  
4.042

2.751  
2.728  
2.718  
2.694

1.822  
1.810  
1.790  
1.783

-0.974

-0.001

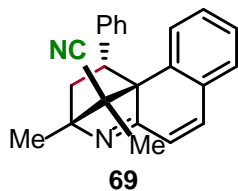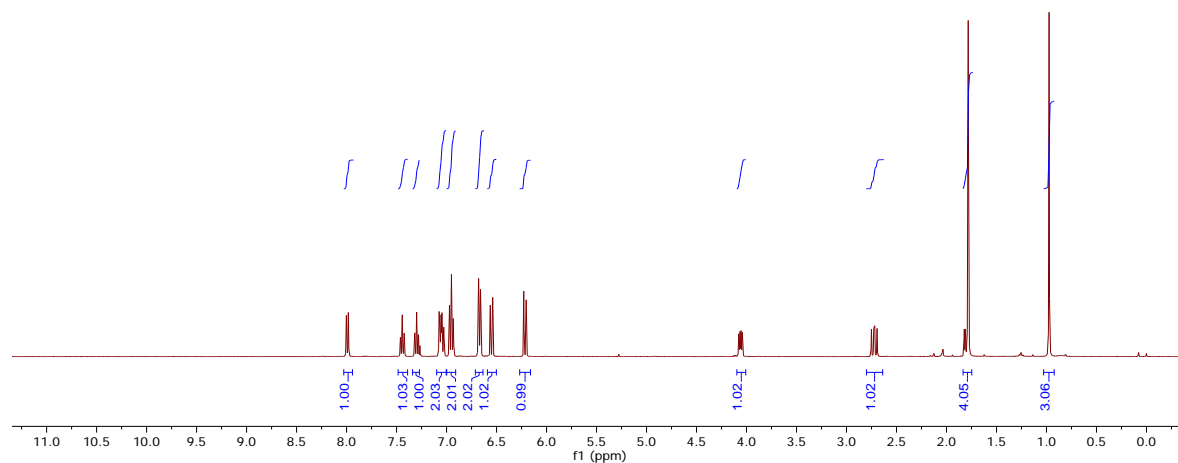

# <sup>13</sup>C NMR (101 MHz, Chloroform-*d*)

173.022

139.084  
137.142  
135.268  
133.506  
129.383  
129.059  
128.223  
127.995  
127.476  
127.059  
125.843  
122.335  
121.832

77.904  
77.478  
77.160  
76.842

67.457  
63.080

50.973

34.751

16.815  
13.579

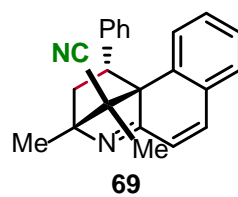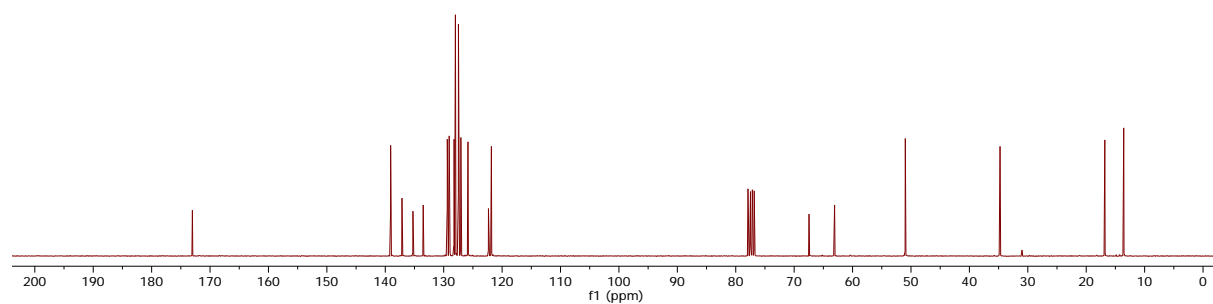

# <sup>1</sup>H NMR (400 MHz, Chloroform-*d*)

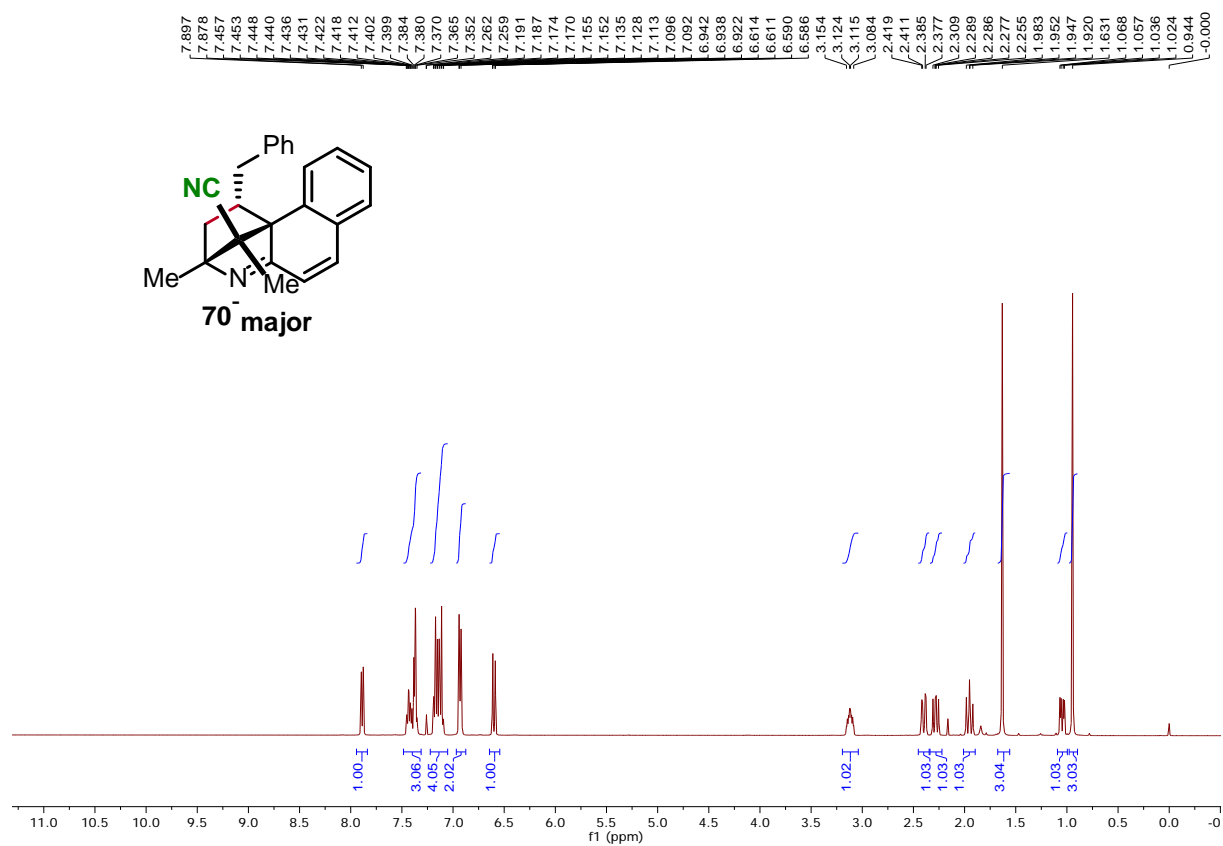

# <sup>13</sup>C NMR (101 MHz, Chloroform-*d*)

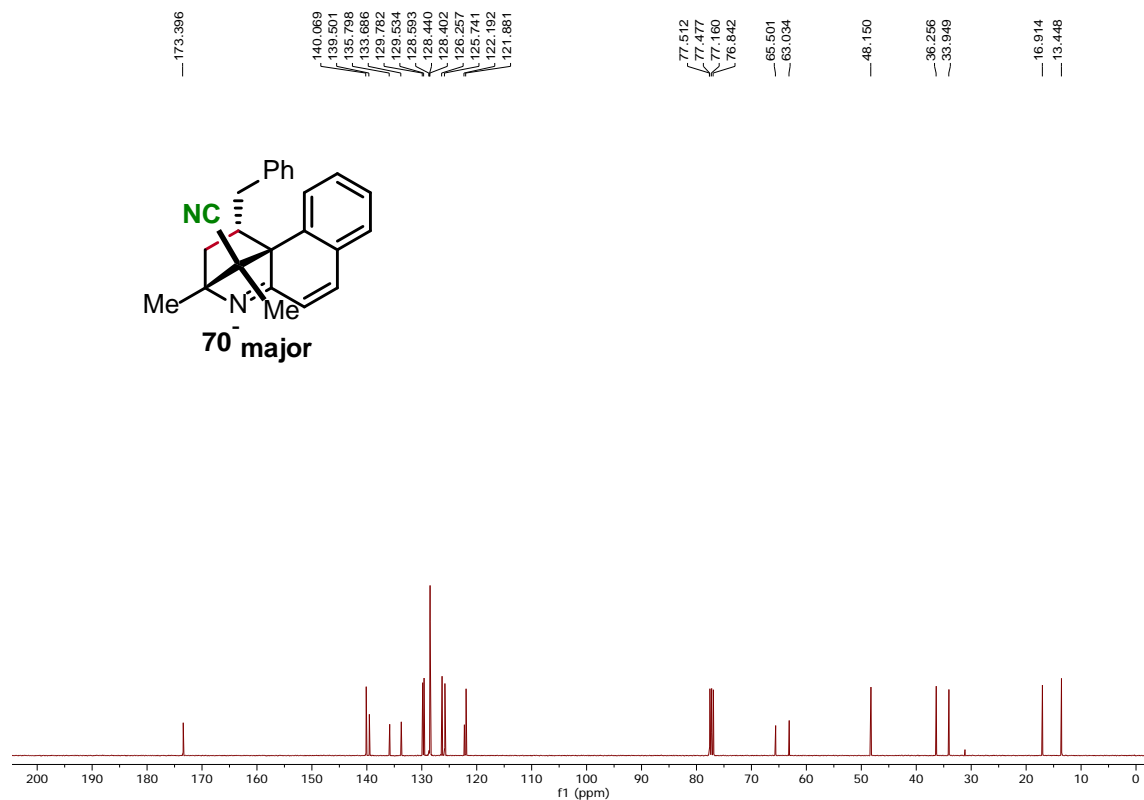

# <sup>1</sup>H NMR (400 MHz, Chloroform-d)

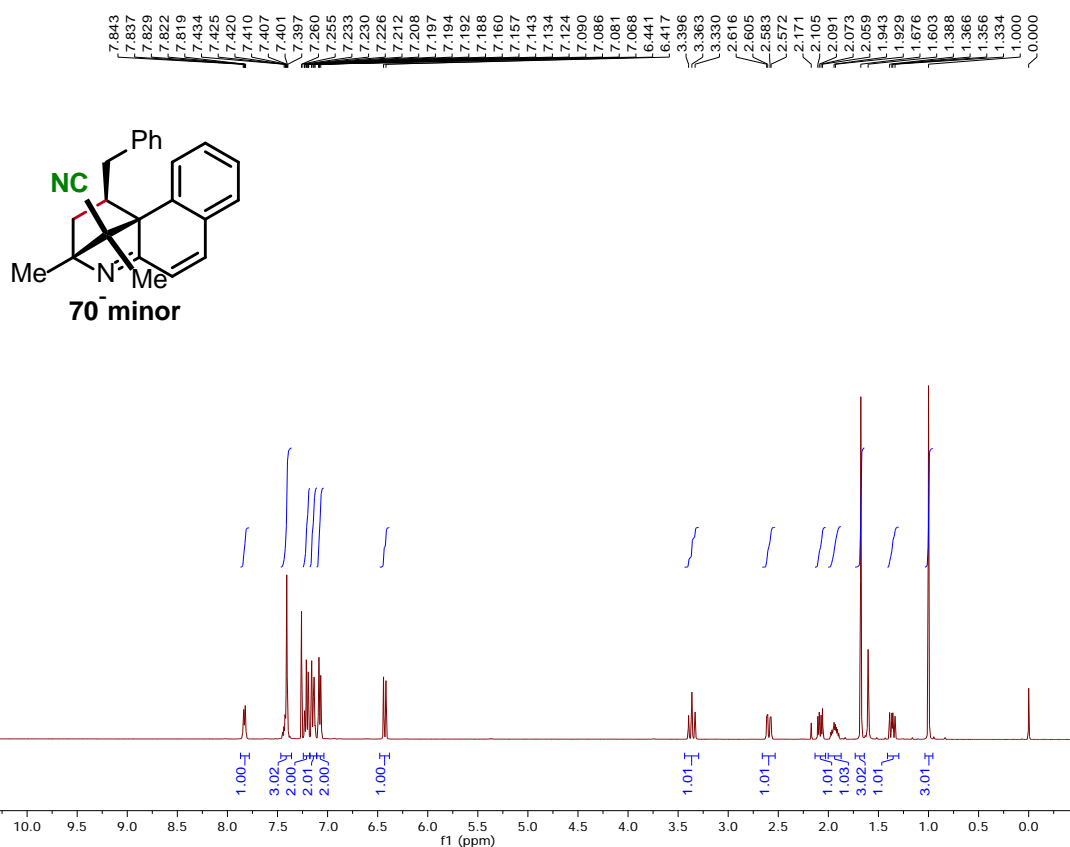

# <sup>13</sup>C NMR (101 MHz, Chloroform-d)

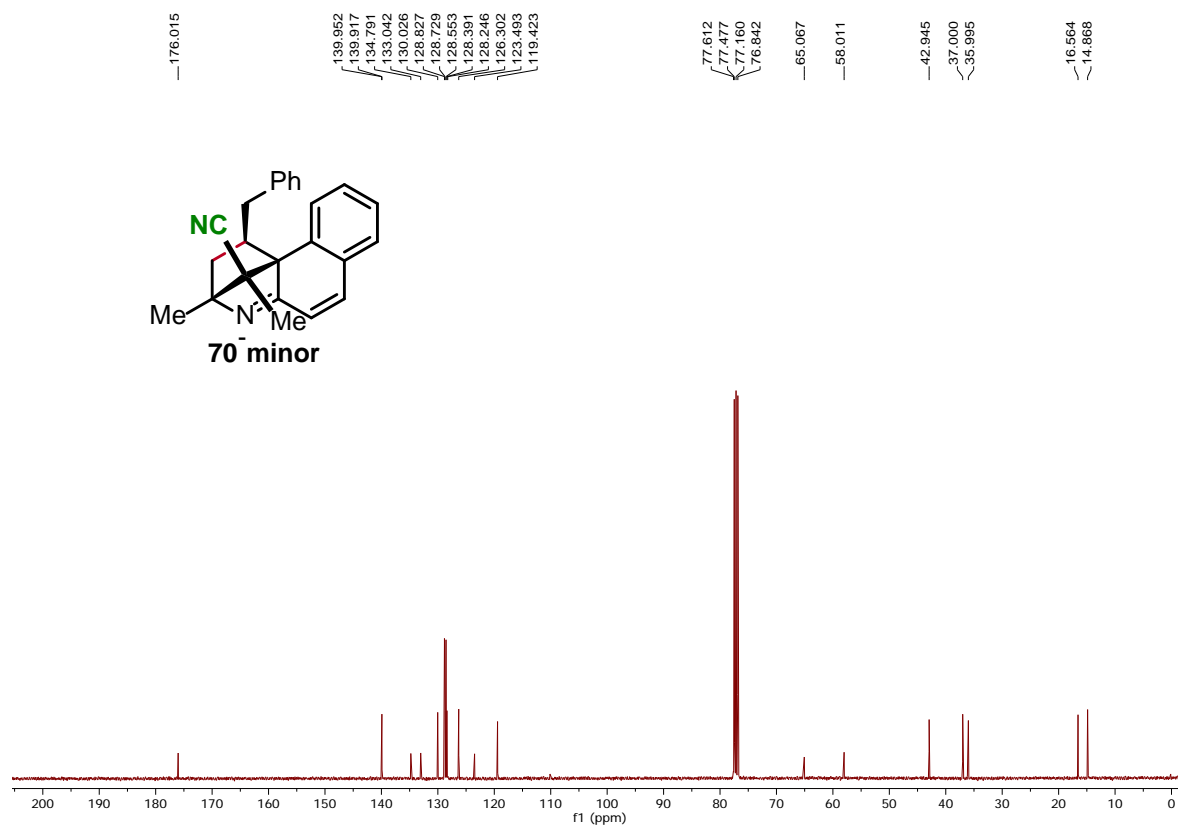

Supplement: ANIE-58-9496-s001.pdf [file ANIE-58-9496-s001.pdf]
